# Supplementary material for: HPV Integration in HNSCC Correlates with Survival Outcomes, Immune Response Signatures, and Candidate Drivers
Source: Oxford University Press journal article supplement (doi:10.1158/1541-7786.mcr-17-0153), 2017-09-19
Supplement: 180810_2_supp_4242490_gvg62w.xlsx [file 180810_2_supp_4242490_gvg62w.xlsx]

## Sheet: hpv_integr_newdb_4_go_kegg
For manuscript: HPV integration in head and neck cancer correlates with survival and suggests candidate drivers.
Lada A. Koneva, Yanxiao Zhang, Shama Virani, Pelle B. Hall, Jonathan B. McHugh, Douglas B. Chepeha, Gregory T.Wolf, Thomas E. Carey, Laura S. Rozek, Maureen A. Sartor
Table S4. GO terms and KEGG pathways enriched for genes differentially expressed between integration-positive and integration-negative HNC tumors.
Id	name	ConceptType	#Genes	<=500?	Coeff	OddsRatio	P-Value	FDR	Direction	SigGenes
GO:0002250	adaptive immune response	GOBP	323	yes	-0.234472	0.790988	9.22e-25	9.89e-22	down	972, 100423062, 301, 3383, 1075, 3659, 214, 3572, 4791, 53833, 7128, 51752, 1739, 127544, 55611, 1604, 7186, 5971, 55061, 5788, 64167, 5585, 920, 3265, 9466, 6363, 5817, 29108, 3635, 958, 973, 3718, 23180, 355, 11119, 57823, 5293, 8915, 925, 54440, 23308, 3717, 2534, 56940, 926, 51010, 9025, 924, 962, 923, 23411, 64005, 6693, 3426, 54923, 90865, 3662, 7454, 939, 8832, 118460, 27040, 1880, 50943, …
GO:0071593	lymphocyte aggregation	GOBP	477	yes	-0.21407	0.807292	1.49e-23	9.66e-21	down	972, 301, 3383, 3936, 7412, 3659, 678, 2885, 207, 3572, 53833, 3620, 1739, 11151, 51043, 3965, 79109, 6352, 1604, 7186, 4690, 5880, 5971, 5058, 5788, 4860, 1051, 920, 5295, 101, 6363, 441478, 9020, 29108, 596, 8764, 5075, 1021, 253260, 57580, 3718, 8324, 3683, 355, 916, 11119, 81704, 5293, 8915, 914, 925, 54440, 23308, 3071, 2534, 9308, 23210, 8456, 1794, 56940, 926, 6932, 55636, 9306, 3932, 4602…
GO:0042110	T cell activation	GOBP	475	yes	-0.214217	0.807173	1.5e-23	9.66e-21	down	972, 301, 3383, 3936, 7412, 3659, 678, 2885, 207, 3572, 53833, 3620, 1739, 11151, 51043, 3965, 79109, 6352, 1604, 7186, 4690, 5880, 5971, 5058, 5788, 4860, 1051, 920, 5295, 101, 6363, 441478, 9020, 29108, 596, 8764, 5075, 1021, 253260, 57580, 3718, 8324, 3683, 355, 916, 11119, 81704, 5293, 8915, 914, 925, 54440, 23308, 3071, 2534, 9308, 23210, 8456, 1794, 56940, 926, 6932, 55636, 9306, 3932, 4602…
GO:0070489	T cell aggregation	GOBP	475	yes	-0.214217	0.807173	1.5e-23	9.66e-21	down	972, 301, 3383, 3936, 7412, 3659, 678, 2885, 207, 3572, 53833, 3620, 1739, 11151, 51043, 3965, 79109, 6352, 1604, 7186, 4690, 5880, 5971, 5058, 5788, 4860, 1051, 920, 5295, 101, 6363, 441478, 9020, 29108, 596, 8764, 5075, 1021, 253260, 57580, 3718, 8324, 3683, 355, 916, 11119, 81704, 5293, 8915, 914, 925, 54440, 23308, 3071, 2534, 9308, 23210, 8456, 1794, 56940, 926, 6932, 55636, 9306, 3932, 4602…
GO:0070486	leukocyte aggregation	GOBP	484	yes	-0.209117	0.8113	1.45e-22	7.2e-20	down	972, 301, 960, 3383, 3936, 7412, 3659, 678, 2885, 207, 3572, 53833, 3620, 1739, 11151, 51043, 3965, 79109, 6352, 1604, 7186, 4690, 5880, 5971, 5058, 5788, 4860, 1051, 920, 5295, 101, 6363, 441478, 9020, 29108, 596, 8764, 5075, 1021, 253260, 57580, 3718, 8324, 3683, 355, 916, 11119, 81704, 5293, 8915, 914, 925, 54440, 23308, 3071, 2534, 9308, 23210, 8456, 1794, 56940, 926, 6932, 55636, 9306, 3932,…
GO:0051249	regulation of lymphocyte activation	GOBP	406	yes	-0.215515	0.806126	4.43e-22	1.9e-19	down	972, 100423062, 301, 4323, 7412, 3659, 678, 2885, 207, 3572, 53833, 3620, 7128, 1739, 11151, 51043, 3965, 79109, 6352, 1604, 7186, 4690, 5880, 5058, 5788, 4860, 1051, 5585, 920, 5295, 9466, 101, 6363, 441478, 9020, 29108, 148022, 3398, 51237, 596, 8764, 3635, 253260, 958, 3718, 558, 355, 916, 472, 8915, 914, 54440, 23308, 3071, 2534, 9308, 286410, 8456, 56940, 51010, 9306, 3932, 4602, 923, 7301, …
GO:0050865	regulation of cell activation	GOBP	493	yes	-0.197842	0.820499	1.14e-20	4.07e-18	down	972, 100423062, 301, 4323, 8543, 7412, 3659, 678, 2885, 207, 3572, 53833, 3620, 7128, 29, 5359, 1739, 11151, 51043, 3965, 79109, 6352, 6813, 1604, 7186, 4690, 727897, 5880, 5058, 5788, 4860, 1051, 5585, 920, 5295, 9466, 101, 6363, 6542, 441478, 9020, 29108, 148022, 3398, 51237, 5341, 596, 8764, 3635, 253260, 6665, 958, 114897, 3718, 558, 355, 916, 472, 8915, 914, 54440, 23308, 3071, 3717, 2534, 9…
GO:0030098	lymphocyte differentiation	GOBP	298	yes	-0.220588	0.802047	2.55e-20	8.21e-18	down	972, 301, 4323, 56262, 7412, 3659, 678, 51043, 3965, 3516, 5971, 5788, 4860, 920, 5295, 101, 6363, 441478, 3398, 596, 3635, 5075, 1021, 57580, 973, 3718, 8324, 558, 355, 916, 472, 5293, 914, 925, 54440, 3071, 9308, 23210, 286410, 8456, 6688, 10320, 1794, 6932, 55636, 3932, 4602, 28514, 7301, 6693, 3815, 915, 3662, 939, 150372, 1236, 1880, 5734, 10461, 50943, 7409, 7535, 6935, 7292, 5452, 9452, 36…
GO:0002694	regulation of leukocyte activation	GOBP	460	yes	-0.198679	0.819813	6.87e-20	2.01e-17	down	972, 100423062, 301, 4323, 7412, 3659, 678, 2885, 207, 3572, 53833, 3620, 7128, 29, 5359, 1739, 11151, 51043, 3965, 79109, 6352, 6813, 1604, 7186, 4690, 727897, 5880, 5058, 5788, 4860, 1051, 5585, 920, 5295, 9466, 101, 6363, 6542, 441478, 9020, 29108, 148022, 3398, 51237, 596, 8764, 3635, 253260, 958, 3718, 558, 355, 916, 472, 8915, 914, 54440, 23308, 3071, 2534, 9308, 286410, 8456, 56940, 27342,…
GO:0042113	B cell activation	GOBP	216	yes	-0.236403	0.789462	2.4e-19	6.73e-17	down	972, 100423062, 4323, 56262, 7412, 678, 7128, 3516, 5788, 5585, 5295, 9466, 148022, 3398, 51237, 596, 3635, 958, 973, 3718, 355, 472, 8935, 5293, 54440, 23308, 3071, 286410, 931, 51010, 9025, 28514, 57181, 3815, 374403, 939, 150372, 118460, 1880, 50943, 7535, 5579, 7292, 5452, 9452, 3676, 974, 3981, 10673, 64092, 11314, 1380, 10538, 3575, 695, 1493, 84174, 1235, 3569, 940, 54900, 89780, 7293, 643…
GO:0098641	cadherin binding involved in cell-cell adhesion	GOMF	272	yes	0.315851	1.37143	3.22e-18	4.7e-16	up	2810, 226, 3728, 301, 7534, 6282, 1981, 6152, 64855, 50848, 3655, 5052, 7458, 999, 5493, 1192, 3898, 7529, 5901, 9689, 2194, 2017, 829, 11187, 2125, 8428, 10755, 1983, 9588, 57142, 10694, 6520, 6455, 85377, 9531, 5861, 11135, 10226, 9414, 5756, 9208, 5214, 6712, 10611, 7082, 10652, 29766, 9748, 6386, 10848, 1739, 4646, 10006, 83939, 5902, 2011, 2801, 8607, 55324, 10598, 4690, 11313, 10938, 2036, …
GO:0004896	cytokine receptor activity	GOMF	96	yes	-0.294302	0.745052	5.02e-18	6.37e-16	down	972, 960, 3459, 7850, 3572, 53833, 3460, 7852, 2152, 3561, 9466, 1439, 3560, 3977, 3587, 3455, 3570, 1234, 1236, 50615, 10663, 58985, 3559, 400935, 5618, 3590, 3575, 2833, 1235, 3594, 8809, 643, 729230, 10148, 8808, 1233, 1271, 1524, 116379, 3579, 2322, 1237, 2826, 133396, 3577, 2829
GO:0098632	protein binding involved in cell-cell adhesion	GOMF	282	yes	0.310526	1.36414	5.34e-18	6.37e-16	up	2810, 226, 3728, 301, 7534, 6282, 1981, 6152, 64855, 50848, 3655, 5052, 7458, 999, 5493, 1192, 3898, 7529, 5901, 9689, 2194, 2017, 829, 11187, 2125, 8428, 10755, 1983, 9588, 57142, 10694, 6520, 6455, 85377, 9531, 5861, 11135, 10226, 9414, 5756, 9208, 5214, 6712, 10611, 7082, 10652, 29766, 9748, 6386, 10848, 1739, 4646, 10006, 83939, 5902, 2011, 2801, 8607, 55324, 10598, 4690, 11313, 10938, 2036, …
GO:0009897	external side of plasma membrane	GOCC	183	yes	-0.228618	0.795632	1.72e-17	1.25e-15	down	972, 100423062, 301, 6382, 5034, 928, 3655, 1889, 3685, 3383, 1048, 4283, 7412, 3949, 214, 3572, 4059, 2152, 3561, 5788, 10630, 920, 19, 8764, 8692, 3560, 958, 973, 355, 916, 6338, 914, 925, 9308, 926, 6402, 931, 2686, 3682, 4897, 6693, 3815, 7018, 1234, 1946, 3902, 939, 1236, 6340, 921, 3604, 974, 2323, 146760, 948, 3559, 2678, 3575, 4684, 969, 2833, 79679, 1493, 930, 5133, 3569, 940, 3594, 2985…
GO:0098631	protein binding involved in cell adhesion	GOMF	287	yes	0.305453	1.35724	1.32e-17	1.45e-15	up	2810, 226, 3728, 301, 7534, 6282, 1981, 6152, 64855, 50848, 3655, 5052, 7458, 999, 5493, 1192, 3898, 7529, 5901, 9689, 2194, 2017, 829, 11187, 2125, 8428, 10755, 1983, 9588, 57142, 10694, 6520, 6455, 85377, 9531, 5861, 11135, 10226, 9414, 5756, 9208, 5214, 6712, 10611, 7082, 10652, 29766, 9748, 6386, 10848, 1739, 4646, 10006, 83939, 5902, 2011, 2801, 8607, 55324, 10598, 4690, 11313, 10938, 2036, …
GO:0045296	cadherin binding	GOMF	291	yes	0.303891	1.35512	1.61e-17	1.63e-15	up	2810, 226, 3728, 301, 7534, 6282, 1981, 6152, 64855, 50848, 3655, 5052, 7458, 999, 5493, 1192, 3898, 7529, 5901, 9689, 2194, 2017, 829, 11187, 2125, 8428, 10755, 1983, 9588, 57142, 10694, 6520, 6455, 85377, 9531, 5861, 11135, 10226, 9414, 5756, 9208, 5214, 6712, 10611, 7082, 10652, 29766, 9748, 6386, 10848, 1739, 4646, 10006, 83939, 5902, 2011, 2801, 8607, 55324, 10598, 4690, 11313, 10938, 2036, …
GO:0051251	positive regulation of lymphocyte activation	GOBP	269	yes	-0.218386	0.803815	1.5e-17	3.58e-15	down	972, 100423062, 301, 4323, 7412, 2885, 207, 3572, 11151, 3965, 79109, 6352, 1604, 7186, 4690, 5058, 5788, 4860, 920, 5295, 101, 6363, 9020, 29108, 148022, 596, 8764, 3635, 253260, 958, 3718, 558, 916, 8915, 54440, 23308, 3071, 2534, 9308, 286410, 51010, 3932, 4602, 923, 57181, 6693, 64926, 1326, 915, 939, 118460, 1236, 1880, 50943, 7409, 7535, 921, 7292, 919, 3600, 2323, 10673, 3559, 3575, 695, 7…
GO:0050867	positive regulation of cell activation	GOBP	301	yes	-0.209127	0.811292	3.5e-17	7.51e-15	down	972, 100423062, 301, 4323, 7412, 2885, 207, 3572, 11151, 3965, 79109, 6352, 1604, 7186, 4690, 5058, 5788, 4860, 920, 5295, 101, 6363, 9020, 29108, 148022, 5341, 596, 8764, 3635, 253260, 6665, 958, 3718, 558, 916, 8915, 914, 54440, 23308, 3071, 3717, 2534, 9308, 286410, 51010, 3932, 4602, 923, 57181, 6693, 2150, 64926, 1326, 915, 90865, 939, 118460, 1236, 1880, 50943, 7409, 7535, 921, 7292, 919, 3…
GO:0002696	positive regulation of leukocyte activation	GOBP	291	yes	-0.207145	0.812902	2.11e-16	4.12e-14	down	972, 100423062, 301, 4323, 7412, 2885, 207, 3572, 11151, 3965, 79109, 6352, 1604, 7186, 4690, 5058, 5788, 4860, 920, 5295, 101, 6363, 9020, 29108, 148022, 596, 8764, 3635, 253260, 958, 3718, 558, 916, 8915, 914, 54440, 23308, 3071, 2534, 9308, 286410, 51010, 3932, 4602, 923, 57181, 6693, 2150, 64926, 1326, 915, 90865, 939, 118460, 1236, 1880, 50943, 7409, 7535, 921, 7292, 919, 3600, 2268, 2323, 1…
hsa04060	Cytokine-cytokine receptor interaction	KEGG	197	yes	-0.240047	0.786591	3.11e-16	6.66e-14	down	4283, 3459, 7850, 7132, 3572, 4055, 53833, 3460, 8795, 7852, 3561, 6364, 6352, 7133, 4804, 4254, 4233, 6363, 1436, 1435, 8764, 1439, 3560, 3977, 958, 355, 2321, 3587, 5156, 650, 4050, 3455, 3570, 55504, 3815, 92, 1234, 939, 1236, 50615, 8793, 7292, 3604, 10663, 3600, 2323, 10673, 58985, 9966, 3559, 5618, 3590, 3575, 2833, 1235, 3569, 3594, 8809, 7293, 51561, 643, 29949, 23529, 970, 8771, 3625, 14…
GO:0042254	ribosome biogenesis	GOBP	451	yes	0.284329	1.32887	3.65e-16	6.72e-14	up	6152, 6165, 11224, 5901, 8780, 9775, 1736, 83939, 23481, 55341, 55651, 29889, 54606, 65083, 55661, 114049, 51081, 55226, 4839, 51068, 55505, 84864, 23560, 51119, 55052, 23160, 84916, 54552, 10199, 51118, 88745, 79066, 54913, 10436, 54881, 51388, 92856, 23016, 27042, 23404, 79080, 11056, 79863, 705, 51491, 84946, 55636, 51010, 9136, 55759, 51093, 85865, 23411, 404672, 11340, 112479, 10438, 55794, …
GO:0005913	cell-cell adherens junction	GOCC	320	yes	0.269353	1.30912	3.49e-15	1.4e-13	up	2810, 226, 3728, 301, 7534, 6282, 1981, 6152, 64855, 50848, 3655, 5052, 7458, 999, 5493, 1192, 1674, 3898, 7529, 5901, 9689, 2194, 2017, 829, 11187, 2125, 8428, 10755, 1983, 9588, 57142, 2697, 10694, 6520, 9231, 81607, 6455, 85377, 9531, 5861, 11135, 10226, 9414, 5756, 9208, 5214, 6712, 10611, 7082, 10652, 29766, 9748, 6386, 10848, 1739, 4646, 10006, 83939, 5902, 2011, 2801, 8607, 55324, 10598, 4…
GO:1903039	positive regulation of leukocyte cell-cell adhesion	GOBP	219	yes	-0.220937	0.801767	1.16e-15	1.96e-13	down	972, 301, 960, 7412, 2885, 207, 3572, 11151, 3965, 79109, 2113, 6352, 1604, 7186, 4690, 5058, 5788, 4860, 920, 5295, 101, 6363, 9020, 29108, 8764, 253260, 3718, 916, 8915, 54440, 23308, 3071, 2534, 9308, 3932, 4602, 923, 6693, 64926, 1326, 915, 1236, 50943, 7409, 7535, 921, 7292, 919, 3600, 3676, 10673, 3559, 3575, 79679, 1493, 55423, 5133, 3569, 940, 3594, 29851, 51561, 917, 6504, 7124, 3574, 72…
GO:0002521	leukocyte differentiation	GOBP	468	yes	-0.176708	0.838024	1.25e-15	2.02e-13	down	972, 301, 4323, 3428, 4057, 10537, 56262, 7412, 3659, 678, 4609, 4055, 4318, 23028, 51043, 3965, 10221, 3516, 7071, 5971, 5788, 4860, 1051, 760, 920, 4254, 5295, 101, 6363, 1436, 1435, 441478, 3398, 596, 3635, 5075, 1021, 6237, 57580, 973, 3718, 8324, 558, 355, 916, 472, 9770, 5293, 914, 925, 84293, 54440, 3071, 2719, 9308, 23210, 286410, 8456, 6688, 10320, 1794, 6932, 55636, 3932, 4602, 28514, 2…
GO:0032943	mononuclear cell proliferation	GOBP	236	yes	-0.212768	0.808344	1.26e-15	2.02e-13	down	972, 301, 7412, 3659, 3572, 53833, 3620, 1739, 11151, 3965, 6352, 1604, 4690, 5880, 5788, 4860, 1051, 5585, 920, 6363, 1435, 29108, 148022, 51237, 596, 3251, 8764, 3635, 958, 973, 3718, 916, 11119, 472, 81704, 54440, 23308, 3071, 2534, 1794, 931, 923, 57181, 6693, 10385, 64926, 1880, 50943, 7535, 7292, 3600, 26279, 10673, 8654, 3559, 11314, 1380, 114836, 7940, 3575, 11326, 79679, 1493, 26191, 356…
GO:0050863	regulation of T cell activation	GOBP	309	yes	-0.202128	0.81699	1.33e-15	2.09e-13	down	972, 301, 7412, 3659, 2885, 207, 3572, 53833, 3620, 1739, 11151, 51043, 3965, 79109, 6352, 1604, 7186, 4690, 5880, 5058, 5788, 4860, 1051, 920, 5295, 101, 6363, 441478, 9020, 29108, 8764, 253260, 3718, 916, 8915, 914, 54440, 23308, 3071, 2534, 9308, 8456, 56940, 9306, 3932, 4602, 923, 6693, 10385, 64926, 1326, 915, 3902, 3662, 201633, 1236, 27040, 50943, 7409, 7535, 921, 6935, 7292, 919, 3600, 26…
GO:0050870	positive regulation of T cell activation	GOBP	212	yes	-0.222622	0.800418	1.55e-15	2.37e-13	down	972, 301, 7412, 2885, 207, 3572, 11151, 3965, 79109, 6352, 1604, 7186, 4690, 5058, 5788, 4860, 920, 5295, 101, 6363, 9020, 29108, 8764, 253260, 3718, 916, 8915, 54440, 23308, 3071, 2534, 9308, 3932, 4602, 923, 6693, 64926, 1326, 915, 1236, 50943, 7409, 7535, 921, 7292, 919, 3600, 10673, 3559, 3575, 79679, 1493, 55423, 5133, 3569, 940, 3594, 29851, 51561, 917, 6504, 3574, 729230, 9402, 10148, 8808…
GO:0046651	lymphocyte proliferation	GOBP	233	yes	-0.212302	0.808721	1.97e-15	2.95e-13	down	972, 301, 7412, 3659, 3572, 53833, 3620, 1739, 11151, 3965, 6352, 1604, 4690, 5880, 5788, 4860, 1051, 5585, 920, 6363, 29108, 148022, 51237, 596, 3251, 8764, 3635, 958, 973, 3718, 916, 11119, 472, 81704, 54440, 23308, 3071, 2534, 1794, 931, 923, 57181, 6693, 10385, 64926, 1880, 50943, 7535, 7292, 3600, 26279, 10673, 8654, 3559, 11314, 1380, 114836, 7940, 3575, 11326, 79679, 1493, 26191, 3569, 940…
GO:1903037	regulation of leukocyte cell-cell adhesion	GOBP	322	yes	-0.197655	0.820653	2.91e-15	4.26e-13	down	972, 301, 960, 9314, 7412, 3659, 2885, 207, 3572, 53833, 3620, 1739, 11151, 51043, 3965, 79109, 2113, 6352, 1604, 7186, 4690, 5880, 5058, 5788, 4860, 1051, 920, 5295, 101, 6363, 441478, 9020, 29108, 8764, 253260, 3718, 916, 8915, 914, 54440, 23308, 3071, 2534, 9308, 8456, 56940, 9306, 3932, 4602, 923, 6693, 10385, 64926, 1326, 915, 3902, 3662, 201633, 1236, 27040, 50943, 7409, 7535, 921, 6935, 72…
GO:0070663	regulation of leukocyte proliferation	GOBP	196	yes	-0.221991	0.800922	3.63e-15	5.2e-13	down	972, 301, 2950, 7412, 3659, 3572, 53833, 3620, 7128, 1739, 11151, 3965, 6352, 1604, 4690, 5880, 5788, 4860, 1051, 5585, 920, 4254, 6363, 1435, 29108, 148022, 51237, 596, 8764, 3635, 958, 3718, 916, 472, 54440, 23308, 3071, 923, 57181, 6693, 10385, 64926, 1880, 50943, 7535, 7292, 3600, 2323, 26279, 10673, 8654, 3559, 11314, 7940, 11326, 79679, 1493, 26191, 3569, 940, 3594, 89780, 7293, 51561, 2280…
GO:0070661	leukocyte proliferation	GOBP	251	yes	-0.206306	0.813584	4.92e-15	6.88e-13	down	972, 301, 2950, 7412, 3659, 3572, 53833, 3620, 7128, 1739, 11151, 3965, 6352, 1604, 4690, 5880, 5788, 4860, 1051, 5585, 920, 4254, 6363, 1435, 29108, 148022, 51237, 596, 3251, 8764, 3635, 958, 973, 3718, 916, 11119, 472, 81704, 54440, 23308, 3071, 2534, 1794, 931, 923, 57181, 6693, 10385, 3815, 2150, 64926, 90865, 1880, 50943, 7535, 7292, 3600, 2323, 26279, 10673, 8654, 3559, 11314, 1380, 114836,…
GO:0022409	positive regulation of cell-cell adhesion	GOBP	240	yes	-0.211029	0.80975	5.55e-15	7.6e-13	down	972, 301, 960, 3655, 7412, 2885, 207, 3572, 11151, 3965, 79109, 2113, 6352, 1604, 7186, 4690, 5058, 5788, 5420, 4860, 8613, 920, 5295, 101, 6363, 9020, 29108, 8764, 253260, 3718, 916, 8915, 54440, 23308, 3071, 2534, 9308, 4092, 3932, 4602, 923, 6693, 64926, 1326, 915, 10272, 1236, 50943, 7409, 7535, 921, 7292, 919, 3600, 3676, 10673, 3559, 5345, 3575, 79679, 1493, 55423, 5133, 3569, 940, 3594, 29…
GO:0070665	positive regulation of leukocyte proliferation	GOBP	124	yes	-0.245331	0.782445	9.35e-15	1.25e-12	down	972, 301, 7412, 3572, 11151, 3965, 6352, 1604, 4690, 5788, 4860, 920, 4254, 6363, 1435, 29108, 148022, 596, 958, 3718, 916, 54440, 23308, 3071, 923, 57181, 6693, 64926, 1880, 50943, 7535, 7292, 3600, 2323, 10673, 3559, 79679, 3569, 940, 3594, 89780, 7293, 51561, 23529, 6504, 4773, 3574, 729230, 10148, 11148, 941, 959, 115650, 3592, 6375
GO:0032944	regulation of mononuclear cell proliferation	GOBP	188	yes	-0.221812	0.801066	9.51e-15	1.25e-12	down	972, 301, 7412, 3659, 3572, 53833, 3620, 1739, 11151, 3965, 6352, 1604, 4690, 5880, 5788, 4860, 1051, 5585, 920, 6363, 1435, 29108, 148022, 51237, 596, 8764, 3635, 958, 3718, 916, 472, 54440, 23308, 3071, 923, 57181, 6693, 10385, 64926, 1880, 50943, 7535, 7292, 3600, 26279, 10673, 8654, 3559, 11314, 7940, 11326, 79679, 1493, 26191, 3569, 940, 3594, 89780, 7293, 51561, 22806, 23529, 6504, 4773, 35…
GO:0030217	T cell differentiation	GOBP	209	yes	-0.214214	0.807176	9.88e-15	1.27e-12	down	972, 301, 3659, 678, 51043, 3965, 5971, 5788, 4860, 920, 101, 6363, 441478, 596, 5075, 1021, 57580, 3718, 8324, 355, 916, 5293, 914, 925, 54440, 3071, 9308, 23210, 8456, 1794, 6932, 55636, 3932, 4602, 6693, 3815, 915, 3662, 1236, 1880, 5734, 50943, 7409, 7535, 6935, 7292, 3600, 26279, 3981, 8325, 3559, 3702, 84524, 114836, 399, 10538, 3575, 1493, 26191, 1235, 3569, 940, 3594, 8809, 51561, 4063, 3…
GO:0050670	regulation of lymphocyte proliferation	GOBP	186	yes	-0.220214	0.802347	2.1e-14	2.55e-12	down	972, 301, 7412, 3659, 3572, 53833, 3620, 1739, 11151, 3965, 6352, 1604, 4690, 5880, 5788, 4860, 1051, 5585, 920, 6363, 29108, 148022, 51237, 596, 8764, 3635, 958, 3718, 916, 472, 54440, 23308, 3071, 923, 57181, 6693, 10385, 64926, 1880, 50943, 7535, 7292, 3600, 26279, 10673, 8654, 3559, 11314, 7940, 11326, 79679, 1493, 26191, 3569, 940, 3594, 89780, 7293, 51561, 22806, 23529, 6504, 4773, 3574, 72…
GO:0032946	positive regulation of mononuclear cell proliferation	GOBP	121	yes	-0.243369	0.783982	3.82e-14	4.55e-12	down	972, 301, 7412, 3572, 11151, 3965, 6352, 1604, 4690, 5788, 4860, 920, 6363, 1435, 29108, 148022, 596, 958, 3718, 916, 54440, 23308, 3071, 923, 57181, 6693, 64926, 1880, 50943, 7535, 7292, 3600, 10673, 3559, 79679, 3569, 940, 3594, 89780, 7293, 51561, 23529, 6504, 4773, 3574, 729230, 10148, 11148, 941, 959, 115650, 3592, 6375
hsa04514	Cell adhesion molecules (CAMs)	KEGG	102	yes	-0.259828	0.771184	9.45e-14	1.01e-11	down	6382, 50848, 3655, 999, 3685, 3383, 7412, 214, 3689, 5788, 4756, 920, 5817, 958, 3683, 914, 925, 6404, 23308, 100506658, 3385, 926, 3684, 6402, 5797, 4897, 3695, 923, 6693, 26047, 3676, 933, 7122, 4684, 23114, 8506, 1493, 5133, 940, 29851, 137075, 3384, 6900, 9378, 941, 23562, 959, 8516, 10666, 54413, 1002
GO:0050671	positive regulation of lymphocyte proliferation	GOBP	119	yes	-0.241561	0.785401	9.3e-14	1.09e-11	down	972, 301, 7412, 3572, 11151, 3965, 6352, 1604, 4690, 5788, 4860, 920, 6363, 29108, 148022, 596, 958, 3718, 916, 54440, 23308, 3071, 923, 57181, 6693, 64926, 1880, 50943, 7535, 7292, 3600, 10673, 3559, 79679, 3569, 940, 3594, 89780, 7293, 51561, 23529, 6504, 4773, 3574, 729230, 10148, 11148, 941, 959, 115650, 3592, 6375
GO:0022407	regulation of cell-cell adhesion	GOBP	390	yes	-0.176576	0.838135	2.34e-13	2.56e-11	down	972, 301, 960, 3655, 999, 9314, 7412, 3659, 2885, 207, 3572, 5747, 53833, 3620, 1739, 11151, 51043, 3965, 79109, 2113, 6352, 1604, 7186, 4690, 5880, 5058, 5788, 5420, 4860, 1051, 2049, 8613, 920, 5295, 23560, 101, 6363, 441478, 9020, 29108, 8764, 253260, 114897, 3718, 916, 83706, 8915, 914, 54440, 23308, 3071, 3717, 2534, 9308, 8456, 56940, 4092, 9306, 3932, 4602, 923, 6693, 10385, 64926, 1326, 1…
GO:0050864	regulation of B cell activation	GOBP	103	yes	-0.244201	0.783331	3.26e-13	3.5e-11	down	972, 100423062, 4323, 678, 7128, 5788, 5585, 9466, 148022, 3398, 51237, 596, 3635, 958, 355, 472, 54440, 3071, 286410, 51010, 57181, 374403, 939, 150372, 118460, 1880, 50943, 7535, 7292, 10673, 64092, 11314, 695, 1493, 84174, 3569, 940, 89780, 7293, 22806, 23529, 200558, 4773, 3574, 30009, 23495, 115650
GO:0098552	side of membrane	GOCC	345	yes	-0.164515	0.848305	3.93e-12	9.53e-11	down	972, 3728, 100423062, 301, 6382, 5034, 928, 6277, 488, 3655, 6892, 1889, 999, 10134, 3685, 3383, 1048, 4283, 7412, 3949, 214, 3572, 2773, 4059, 7803, 5747, 5127, 7297, 1739, 2769, 2152, 3561, 2787, 7186, 5788, 5996, 10630, 10188, 920, 2768, 1828, 19, 622, 2770, 8764, 8692, 3560, 958, 973, 3718, 355, 916, 9462, 6338, 1917, 3055, 914, 925, 3717, 2534, 9308, 408, 8514, 5997, 926, 6402, 931, 2686, 36…
GO:0002460	adaptive immune response based on somatic recombination of immune receptors built from immunoglobulin superfamily domains	GOBP	213	yes	-0.199257	0.819339	2.57e-12	2.64e-10	down	972, 100423062, 301, 3383, 1075, 4791, 53833, 7128, 1739, 1604, 7186, 5971, 55061, 5788, 5585, 920, 3265, 9466, 6363, 5817, 3635, 958, 3718, 23180, 355, 8915, 925, 54440, 56940, 51010, 9025, 64005, 6693, 3426, 90865, 3662, 7454, 939, 118460, 50943, 7292, 5452, 89857, 3981, 10673, 10333, 727, 730, 1380, 114836, 10538, 3575, 695, 135250, 84174, 1235, 3569, 940, 3594, 3077, 8809, 733, 51561, 4063, 6…
GO:0045058	T cell selection	GOBP	40	yes	-0.297525	0.742654	4.93e-12	4.88e-10	down	972, 920, 596, 355, 916, 8456, 1794, 6693, 915, 3662, 1236, 50943, 7535, 3600, 114836, 10538, 3569, 940, 3594, 51561, 4063, 387357, 8995
GO:0042102	positive regulation of T cell proliferation	GOBP	87	yes	-0.247374	0.780849	5.13e-12	5e-10	down	301, 7412, 3572, 11151, 3965, 6352, 1604, 4690, 5788, 4860, 920, 6363, 29108, 3718, 916, 54440, 23308, 3071, 923, 6693, 64926, 50943, 7535, 7292, 3600, 10673, 3559, 79679, 3569, 940, 3594, 51561, 6504, 729230, 10148, 11148, 941, 959, 115650, 3592, 6375
GO:0016072	rRNA metabolic process	GOBP	369	yes	0.260554	1.29765	8.47e-12	7.46e-10	up	6152, 6165, 11224, 8780, 9775, 1736, 23481, 55651, 54606, 65083, 55661, 114049, 55226, 4839, 55505, 23560, 51119, 23160, 84916, 10199, 51118, 88745, 79066, 54913, 10436, 54881, 92856, 23016, 27042, 23404, 79080, 11056, 79863, 705, 84946, 55636, 51010, 9136, 55759, 51093, 23411, 404672, 11340, 112479, 10438, 118460, 64282, 10799, 63899, 10595
GO:0046631	alpha-beta T cell activation	GOBP	118	yes	-0.232441	0.792597	9.45e-12	8.22e-10	down	301, 3659, 51043, 3965, 1604, 5971, 4860, 1051, 6363, 596, 8764, 5075, 3718, 916, 54440, 3071, 9308, 1794, 6932, 4602, 64926, 3662, 1880, 5734, 50943, 7535, 7292, 3600, 26279, 3702, 11314, 114836, 10538, 3569, 940, 3594, 3077, 8809, 51561, 4063, 944, 8320, 729230, 2529, 10148, 941, 2841, 3592, 6375, 8995
GO:0042098	T cell proliferation	GOBP	163	yes	-0.210037	0.810555	1.01e-11	8.68e-10	down	301, 7412, 3659, 3572, 53833, 3620, 1739, 11151, 3965, 6352, 1604, 4690, 5880, 5788, 4860, 1051, 920, 6363, 29108, 8764, 3718, 916, 11119, 81704, 54440, 23308, 3071, 2534, 1794, 923, 6693, 10385, 64926, 50943, 7535, 7292, 3600, 26279, 10673, 8654, 3559, 11326, 79679, 1493, 3569, 940, 3594, 5294, 7293, 51561, 6556, 6504, 729230, 10148, 8740, 11148, 2796, 941, 959, 115650, 3592, 6375, 8995
GO:0006364	rRNA processing	GOBP	361	yes	0.259157	1.29584	1.56e-11	1.3e-09	up	6152, 6165, 11224, 8780, 9775, 1736, 23481, 55651, 54606, 65083, 55661, 114049, 55226, 4839, 55505, 23560, 51119, 23160, 84916, 10199, 51118, 88745, 79066, 54913, 10436, 54881, 92856, 23016, 27042, 23404, 79080, 11056, 79863, 705, 84946, 55636, 51010, 9136, 55759, 51093, 23411, 404672, 11340, 112479, 10438, 118460, 64282, 10799, 63899
GO:0098797	plasma membrane protein complex	GOCC	460	yes	-0.149648	0.861011	8.57e-11	1.56e-09	down	972, 3728, 1173, 3655, 483, 999, 2706, 801, 3685, 2017, 2697, 7412, 23603, 1212, 2885, 214, 3572, 2773, 8837, 6464, 6386, 10804, 1739, 1175, 3689, 2769, 7205, 2787, 7186, 4756, 10188, 20, 920, 2768, 101, 9779, 6844, 1536, 2770, 1439, 958, 1756, 973, 3683, 355, 916, 143098, 8915, 925, 5142, 408, 8514, 650, 7097, 10345, 926, 3684, 3667, 4092, 3570, 3682, 134957, 3695, 923, 9424, 54331, 26047, 7018,…
GO:0050853	B cell receptor signaling pathway	GOBP	48	yes	-0.282655	0.75378	2e-11	1.65e-09	down	100423062, 9564, 5788, 596, 973, 23180, 5293, 3071, 3932, 9404, 57181, 54923, 150372, 7535, 5579, 974, 89857, 11314, 695, 1493, 930, 26191, 4773, 640, 26228
hsa05340	Primary immunodeficiency	KEGG	33	yes	-0.309927	0.733501	2.39e-11	1.7e-09	down	3561, 5993, 5788, 920, 958, 973, 3718, 916, 4261, 925, 926, 3932, 915, 7535, 3575, 695, 930, 29851, 23495, 959, 115650, 57379
GO:0032729	positive regulation of interferon-gamma production	GOBP	55	yes	-0.270017	0.763367	2.14e-11	1.75e-09	down	3965, 3265, 9466, 29108, 916, 914, 54440, 5142, 3394, 7292, 114836, 26191, 3594, 8809, 51561, 6556, 3670, 6504, 7124, 51284, 729230, 10148, 54106, 4049, 10666, 115650, 3592, 7294, 353376
GO:0042129	regulation of T cell proliferation	GOBP	137	yes	-0.216122	0.805637	3.87e-11	3.08e-09	down	301, 7412, 3659, 3572, 53833, 3620, 1739, 11151, 3965, 6352, 1604, 4690, 5880, 5788, 4860, 1051, 920, 6363, 29108, 8764, 3718, 916, 54440, 23308, 3071, 923, 6693, 10385, 64926, 50943, 7535, 7292, 3600, 26279, 10673, 8654, 3559, 11326, 79679, 1493, 3569, 940, 3594, 51561, 6504, 729230, 10148, 11148, 2796, 941, 959, 115650, 3592, 6375, 8995
GO:0098798	mitochondrial protein complex	GOCC	204	yes	0.307453	1.35996	1.83e-10	3.26e-09	up	518, 56901, 4710, 10476, 9868, 10105, 4711, 10452, 9551, 93974, 4719, 29796, 401505, 9556, 100287932, 4702, 10440, 55967, 10845, 80273, 1737, 90550, 4731, 4718, 55013, 26521, 139322, 51103
GO:0045785	positive regulation of cell adhesion	GOBP	371	yes	-0.161551	0.850823	6.28e-11	4.87e-09	down	972, 301, 960, 3655, 6281, 3685, 7412, 2885, 207, 3572, 9806, 1307, 2932, 11151, 3965, 2199, 79109, 2113, 6352, 4814, 1604, 7186, 3611, 4690, 5058, 5788, 5420, 4860, 25930, 8613, 920, 5295, 51144, 5764, 101, 6363, 1435, 9020, 29108, 8764, 1021, 253260, 10551, 57580, 3718, 916, 29984, 8915, 54440, 23308, 3071, 3717, 2534, 9308, 5795, 6809, 4092, 3932, 4602, 923, 6693, 64926, 1326, 915, 10272, 1236…
hsa04640	Hematopoietic cell lineage	KEGG	68	yes	-0.25164	0.777524	2.88e-10	1.54e-08	down	928, 960, 3655, 7850, 1604, 920, 4254, 1436, 1435, 916, 914, 925, 951, 926, 3684, 931, 3570, 924, 3815, 915, 921, 3676, 2323, 933, 948, 4311, 3559, 1380, 3590, 909, 3575, 930, 3569, 917, 1440, 7124, 3574, 2208, 913, 2811, 2322
GO:0001819	positive regulation of cytokine production	GOBP	438	yes	-0.15587	0.855671	2.51e-10	1.84e-08	down	972, 301, 2547, 3428, 330, 3065, 3659, 3091, 3572, 4791, 53833, 9208, 3620, 340061, 4790, 3965, 6364, 5603, 7186, 10564, 79792, 1051, 920, 170506, 5295, 3265, 9466, 5437, 101, 6363, 1436, 1536, 55773, 10555, 29108, 148022, 22861, 8764, 8692, 27297, 958, 5610, 916, 1545, 8915, 914, 54440, 3717, 5142, 9308, 7097, 4050, 3570, 3394, 63940, 923, 22900, 6693, 2150, 7100, 90865, 3662, 201633, 150372, 12…
GO:0005759	mitochondrial matrix	GOCC	454	yes	0.193158	1.21307	1.88e-09	3.01e-08	up	292, 4170, 37, 7417, 4191, 217, 3735, 2806, 7157, 6464, 2617, 11222, 4942, 10105, 51021, 3336, 2108, 85476, 6182, 4719, 25828, 79586, 51081, 5625, 23203, 57129, 64960, 501, 2744, 84532, 6742, 10531, 1593, 55052, 205, 211, 51116, 84706, 622, 80308, 56945, 6183, 7298, 55157, 51218, 2232, 10845, 54948, 80273, 1737, 219927, 80222, 54949, 124454, 8803, 25902, 11112, 92399, 25996, 118487, 91574, 5888, …
GO:0001533	cornified envelope	GOCC	31	yes	0.480865	1.61747	1.97e-09	3.04e-08	up	301, 6699, 6698, 6700, 2125, 7051, 6704, 6703, 84518, 8796, 1041, 6705, 6706, 1474, 6701, 353133, 163778
GO:0032655	regulation of interleukin-12 production	GOBP	49	yes	-0.266231	0.766262	5.63e-10	3.73e-08	down	3659, 3620, 4790, 3965, 6363, 958, 3718, 7097, 4050, 11213, 3394, 201633, 1236, 7292, 3604, 948, 51561, 3670, 6504, 54106, 959
GO:0030183	B cell differentiation	GOBP	94	yes	-0.224132	0.79921	6.73e-10	4.29e-08	down	4323, 56262, 7412, 678, 3516, 5295, 3398, 596, 3635, 973, 3718, 472, 3071, 286410, 28514, 3815, 939, 150372, 1880, 7535, 5452, 9452, 3676, 974, 1380, 695, 22806, 23529, 959, 2322, 1015, 57379
GO:0032649	regulation of interferon-gamma production	GOBP	85	yes	-0.233262	0.791946	7.19e-10	4.54e-08	down	53833, 3965, 3265, 9466, 29108, 558, 916, 914, 54440, 5142, 3394, 90865, 1236, 50943, 7292, 10225, 114836, 26191, 3594, 8809, 51561, 6556, 3670, 6504, 7124, 51284, 729230, 10148, 54106, 4049, 10666, 115650, 3592, 6375, 7294, 353376
GO:0031294	lymphocyte costimulation	GOBP	65	yes	-0.24541	0.782383	7.43e-10	4.55e-08	down	2885, 207, 79109, 5058, 920, 5295, 6363, 9020, 8764, 253260, 916, 23308, 2534, 3932, 6693, 1326, 915, 1236, 7409, 921, 7292, 919, 10673, 1493, 5133, 940, 29851, 917, 9402, 8740, 11148, 151888, 941, 959, 115650, 5063
GO:0031295	T cell costimulation	GOBP	65	yes	-0.24541	0.782383	7.43e-10	4.55e-08	down	2885, 207, 79109, 5058, 920, 5295, 6363, 9020, 8764, 253260, 916, 23308, 2534, 3932, 6693, 1326, 915, 1236, 7409, 921, 7292, 919, 10673, 1493, 5133, 940, 29851, 917, 9402, 8740, 11148, 151888, 941, 959, 115650, 5063
GO:0032615	interleukin-12 production	GOBP	51	yes	-0.259337	0.771563	1.67e-09	9.84e-08	down	3659, 3620, 4790, 3965, 6363, 958, 3718, 7097, 4050, 11213, 3394, 201633, 1236, 7292, 3604, 948, 51561, 3670, 6504, 54106, 959
GO:0002263	cell activation involved in immune response	GOBP	209	yes	-0.180078	0.835205	2.06e-09	1.2e-07	down	301, 3383, 3936, 29, 11151, 3965, 56892, 6813, 5880, 5971, 9466, 6363, 6844, 29108, 148022, 958, 3718, 3683, 5293, 1794, 27342, 51010, 57102, 4602, 9025, 28514, 3815, 2150, 90865, 3662, 8832, 118460, 27040, 1880, 5734, 50943, 7535, 54518, 7292, 9452, 2268, 3981, 11314, 114836, 10538, 695, 1235, 3569, 940, 3594, 8809, 5294, 51561, 4064, 2624, 4063, 6556, 23529, 200558, 6504, 2205, 8320, 729230, 15…
GO:0002757	immune response-activating signal transduction	GOBP	475	yes	-0.141537	0.868023	2.43e-09	1.38e-07	down	71, 100423062, 1508, 3320, 5708, 330, 4057, 4792, 10318, 10787, 29979, 3659, 2885, 4620, 10552, 5700, 10197, 5747, 5707, 7128, 5359, 5686, 5641, 5713, 3689, 10006, 4790, 5717, 7334, 4690, 5971, 5058, 7410, 9564, 5788, 920, 5295, 3265, 7456, 101, 5718, 5716, 4214, 148022, 596, 3635, 7867, 973, 23180, 2533, 916, 11119, 10454, 8935, 5293, 8915, 3055, 26999, 5567, 3071, 2534, 3937, 5142, 5795, 7097, …
GO:0098800	inner mitochondrial membrane protein complex	GOCC	166	yes	0.308405	1.36125	9.96e-09	1.48e-07	up	518, 56901, 4710, 10476, 10105, 4711, 9551, 93974, 4719, 29796, 9556, 100287932, 4702, 10440, 55967, 80273, 90550, 4731, 4718, 55013, 139322, 51103
GO:0030431	sleep	GOBP	22	yes	-0.311067	0.732665	3.59e-09	2.01e-07	down	8863, 5730, 1737, 2903, 6770, 3569, 5021, 3737, 51738
GO:0002237	response to molecule of bacterial origin	GOBP	302	yes	-0.156796	0.854879	3.74e-09	2.08e-07	down	2950, 4057, 4792, 9516, 3065, 3383, 4283, 7412, 207, 6278, 7132, 4055, 4791, 3620, 7128, 7082, 29, 8795, 10804, 9536, 4790, 3965, 10221, 6364, 6352, 1604, 5467, 7133, 1051, 4804, 19, 29108, 148022, 8764, 1439, 7867, 958, 558, 355, 8915, 59307, 3055, 3587, 3717, 5142, 4257, 7097, 3656, 57088, 11213, 3394, 8106, 923, 1234, 7100, 939, 1236, 5734, 8793, 7292, 3604, 7096, 10225, 6770, 10333, 948, 2706…
GO:0032609	interferon-gamma production	GOBP	97	yes	-0.219729	0.802736	4.61e-09	2.54e-07	down	53833, 3965, 3265, 9466, 29108, 558, 916, 11119, 914, 54440, 5142, 3394, 2150, 90865, 1236, 50943, 7292, 10225, 3702, 114836, 79679, 26191, 3594, 8809, 51561, 6556, 3670, 6504, 7124, 51284, 8320, 729230, 10148, 54106, 4049, 10666, 115650, 3592, 6375, 7294, 353376
GO:0002366	leukocyte activation involved in immune response	GOBP	207	yes	-0.177418	0.83743	5.27e-09	2.85e-07	down	301, 3383, 3936, 29, 11151, 3965, 6813, 5880, 5971, 9466, 6363, 6844, 29108, 148022, 958, 3718, 3683, 5293, 1794, 27342, 51010, 57102, 4602, 9025, 28514, 3815, 2150, 90865, 3662, 8832, 118460, 27040, 1880, 5734, 50943, 7535, 54518, 7292, 9452, 2268, 3981, 11314, 114836, 10538, 695, 1235, 3569, 940, 3594, 8809, 5294, 51561, 4064, 2624, 4063, 6556, 23529, 200558, 6504, 2205, 8320, 729230, 1524, 300…
GO:0046632	alpha-beta T cell differentiation	GOBP	88	yes	-0.224571	0.798859	5.9e-09	3.11e-07	down	301, 3659, 51043, 3965, 5971, 4860, 6363, 596, 5075, 3718, 54440, 3071, 9308, 6932, 4602, 3662, 1880, 5734, 50943, 7535, 7292, 26279, 3702, 114836, 10538, 3569, 3594, 8809, 51561, 4063, 944, 8320, 2529, 941, 2841, 8995
GO:0098802	plasma membrane receptor complex	GOCC	172	yes	-0.184283	0.831701	2.46e-08	3.53e-07	down	3655, 3685, 214, 3572, 6386, 1739, 3689, 7205, 7186, 920, 1439, 958, 973, 3683, 916, 8915, 925, 650, 7097, 926, 3684, 3667, 3570, 3682, 134957, 3695, 923, 7018, 915, 2903, 7535, 54518, 2550, 919, 3676, 974, 7096, 2906, 10333, 3569, 3594, 3077, 126129, 22941, 917, 27092, 658, 50852, 1271, 1139, 8516, 9568, 1740, 8973, 1137
GO:0031424	keratinization	GOBP	33	yes	0.451266	1.5703	7.93e-09	4.08e-07	up	3868, 2810, 5493, 6699, 6698, 6700, 2125, 7051, 6704, 6703, 84518, 84283, 6705, 6706, 7062, 6701, 3849, 353133, 163778
hsa03008	Ribosome biogenesis in eukaryotes	KEGG	69	yes	0.398475	1.48955	1.27e-08	5.18e-07	up	5901, 1460, 1736, 55341, 55651, 29889, 65083, 55226, 51068, 55505, 23560, 51119, 23160, 84916, 54552, 10199, 54913, 10436, 10248, 92856, 25996, 1459, 10799
hsa04672	Intestinal immune network for IgA production	KEGG	27	yes	-0.289506	0.748633	1.75e-08	5.34e-07	down	4055, 7852, 9020, 958, 23308, 3695, 3600, 3676, 10673, 3569, 940, 29851, 608, 23495, 941, 959, 115650, 2826, 57379
GO:0043383	negative T cell selection	GOBP	10	yes	-0.360401	0.697396	1.4e-08	6.98e-07	down	972, 355, 916, 1794, 6693, 1236, 7535, 940, 387357
GO:0032496	response to lipopolysaccharide	GOBP	282	yes	-0.153587	0.857626	1.87e-08	9.13e-07	down	2950, 4057, 4792, 9516, 3065, 3383, 4283, 7412, 207, 6278, 7132, 4055, 4791, 3620, 7128, 7082, 29, 8795, 10804, 9536, 4790, 3965, 10221, 6364, 6352, 1604, 5467, 7133, 1051, 4804, 19, 29108, 148022, 8764, 1439, 7867, 958, 558, 355, 59307, 3055, 3587, 3717, 5142, 4257, 7097, 3656, 57088, 11213, 3394, 8106, 923, 1234, 7100, 939, 1236, 5734, 8793, 7292, 3604, 10225, 6770, 948, 27063, 26191, 3569, 729…
GO:0002706	regulation of lymphocyte mediated immunity	GOBP	110	yes	-0.20703	0.812995	2.26e-08	1.07e-06	down	53833, 3965, 7186, 5788, 6318, 9466, 5817, 958, 54440, 56940, 51010, 6693, 3902, 7454, 118460, 50943, 7409, 7292, 10225, 114836, 3575, 695, 3569, 940, 3594, 3077, 4068, 51561, 23529, 200558, 6504, 7124, 2205, 56253, 2208, 146850, 30009, 4049, 10666, 259197, 3592, 117157, 6375
GO:0060326	cell chemotaxis	GOBP	267	yes	-0.165468	0.847497	2.29e-08	1.08e-06	down	972, 301, 2950, 4283, 7412, 6278, 3689, 7852, 11151, 3965, 6364, 6352, 5880, 9564, 79148, 4233, 101, 51119, 8394, 79902, 6363, 1435, 57449, 8829, 11240, 1839, 57580, 9037, 5293, 2321, 3071, 3603, 5142, 5156, 3570, 1907, 7984, 63940, 3815, 2150, 1234, 1236, 4856, 1880, 120425, 7409, 9732, 2247, 51411, 2246, 57118, 727, 2833, 9420, 6283, 1235, 3569, 2047, 5294, 51561, 643, 5587, 54210, 729230, 6357…
GO:0006091	generation of precursor metabolites and energy	GOBP	438	yes	0.200372	1.22186	2.37e-08	1.1e-06	up	2597, 226, 7167, 5230, 6774, 5500, 801, 5223, 37, 4191, 54205, 3091, 4609, 207, 3572, 3099, 4710, 5214, 9611, 5209, 2932, 10105, 4711, 1534, 5836, 7360, 2997, 93974, 2108, 5467, 4719, 9238, 29796, 4204, 2026, 5257, 2992, 57017, 4702, 55967, 2232, 10063, 664, 1737, 54949, 8803, 4731, 7262, 4718, 3667, 5208, 51167, 60493, 5255, 5210, 9945, 51103, 5507, 89801, 5167, 9365, 648791, 130752
GO:0042100	B cell proliferation	GOBP	69	yes	-0.232624	0.792451	2.4e-08	1.11e-06	down	972, 5788, 5585, 148022, 51237, 596, 3635, 958, 973, 472, 54440, 3071, 931, 57181, 1880, 10673, 11314, 1380, 3575, 1493, 89780, 7293, 4064, 22806, 23529, 4773, 3574, 23495, 959, 115650
GO:0002697	regulation of immune effector process	GOBP	312	yes	-0.151241	0.85964	2.78e-08	1.25e-06	down	972, 301, 7009, 1173, 375, 330, 162, 53833, 7128, 340061, 29, 1175, 3965, 6813, 1604, 7186, 5880, 55061, 5788, 6318, 5585, 920, 9466, 6363, 54476, 10053, 51606, 5817, 29108, 51237, 8764, 1174, 958, 3718, 5610, 60489, 8915, 3055, 54440, 2534, 5627, 1794, 56940, 27342, 926, 11213, 51010, 57102, 3932, 4602, 6693, 3426, 2150, 5650, 200316, 3902, 90865, 3662, 7454, 8832, 118460, 50943, 7409, 7535, 984…
GO:0050920	regulation of chemotaxis	GOBP	183	yes	-0.178052	0.836899	3.26e-08	1.46e-06	down	972, 2950, 5361, 4283, 6278, 6091, 7852, 2152, 3965, 6352, 5880, 79148, 54910, 1954, 4233, 6363, 1435, 8829, 11240, 57556, 9037, 3071, 3603, 5156, 6809, 3570, 1907, 63940, 10154, 2150, 1236, 4856, 1880, 285, 2247, 2246, 57118, 727, 6092, 1235, 3569, 89780, 9048, 51561, 5587, 223117, 729230, 1233, 8740, 3579, 57715, 2841, 26228, 4908, 3592, 9723, 6375, 8995, 55079
GO:0043235	receptor complex	GOCC	305	yes	-0.146561	0.863673	1.17e-07	1.65e-06	down	972, 960, 3655, 5361, 3685, 4915, 3949, 214, 7132, 3572, 6386, 1739, 3689, 7205, 7186, 920, 8829, 1439, 3977, 958, 973, 3683, 916, 8915, 925, 2321, 650, 7097, 926, 3684, 3667, 3570, 3682, 134957, 3695, 923, 10154, 7018, 92, 915, 10267, 2903, 7535, 54518, 2550, 919, 3676, 974, 7096, 2906, 10333, 1380, 83416, 4306, 3569, 5979, 3594, 3077, 126129, 22941, 917, 27092, 51284, 91355, 658, 50852, 1271, 1…
GO:0045060	negative thymic T cell selection	GOBP	9	yes	-0.363257	0.695408	3.85e-08	1.71e-06	down	972, 355, 916, 1794, 6693, 1236, 7535, 940
GO:0009161	ribonucleoside monophosphate metabolic process	GOBP	369	yes	0.215513	1.2405	4.11e-08	1.8e-06	up	2597, 226, 7167, 5230, 6774, 5223, 518, 54205, 3091, 2987, 8833, 3099, 9414, 4710, 523, 10476, 5214, 9611, 5209, 1739, 10105, 4711, 9551, 353, 93974, 4625, 4719, 7372, 29796, 4204, 2026, 205, 11164, 57017, 4702, 3251, 55967, 272, 7378, 260425, 54949, 4731, 4718, 5208, 4907, 5210, 1497, 51103, 122622, 5158, 4355, 1723, 1740, 525
GO:0032653	regulation of interleukin-10 production	GOBP	41	yes	-0.260355	0.770778	4.27e-08	1.86e-06	down	53833, 3620, 3965, 28951, 29108, 3718, 54440, 9308, 7097, 28514, 3662, 201633, 50943, 7292, 3604, 940, 51561, 54106, 959, 6375
GO:0045061	thymic T cell selection	GOBP	19	yes	-0.308829	0.734307	5.37e-08	2.29e-06	down	972, 355, 916, 8456, 1794, 6693, 915, 1236, 7535, 940
GO:0005031	tumor necrosis factor-activated receptor activity	GOMF	25	yes	-0.295952	0.743823	3.51e-08	2.31e-06	down	7132, 4055, 8795, 7133, 4804, 8764, 958, 355, 55504, 939, 8793, 3604, 7293, 8771
GO:0005035	death receptor activity	GOMF	26	yes	-0.295952	0.743823	3.51e-08	2.31e-06	down	7132, 4055, 8795, 7133, 4804, 8764, 958, 355, 55504, 939, 8793, 3604, 7293, 8771
GO:0042088	T-helper 1 type immune response	GOBP	38	yes	-0.26728	0.765459	6.63e-08	2.77e-06	down	301, 5971, 3265, 9466, 6363, 3718, 90865, 7292, 10333, 3594, 8809, 51561, 6556, 6504, 729230, 10148, 941, 6375
GO:0002819	regulation of adaptive immune response	GOBP	126	yes	-0.194675	0.823102	6.88e-08	2.85e-06	down	301, 3659, 3572, 53833, 7128, 7186, 5788, 5585, 920, 9466, 6363, 5817, 29108, 958, 3718, 54440, 56940, 51010, 962, 23411, 6693, 90865, 7454, 118460, 50943, 7292, 10673, 64092, 3575, 695, 3569, 940, 3594, 3077, 246, 51561, 6556, 23529, 200558, 6504, 7124, 2205, 729230, 2208, 30009, 4049, 941, 10666, 115650, 259197, 3592, 6375, 8995
GO:0045619	regulation of lymphocyte differentiation	GOBP	128	yes	-0.190724	0.826361	6.91e-08	2.85e-06	down	972, 301, 4323, 3659, 678, 51043, 3965, 4860, 101, 6363, 441478, 3398, 3635, 3718, 558, 355, 914, 54440, 3071, 9308, 286410, 8456, 4602, 3662, 939, 150372, 50943, 7535, 6935, 7292, 3600, 2323, 3559, 84524, 3575, 695, 1493, 3569, 940, 3594, 51561, 22806, 3574, 8808, 146850, 941, 3592, 8995
GO:0006415	translational termination	GOBP	106	yes	0.302966	1.35387	7.43e-08	3.05e-06	up	11222, 327, 51021, 6182, 51073, 51081, 57129, 64960, 55052, 64928, 56945, 6183, 55239, 54948, 219927, 92399, 118487, 65080, 54534, 10884, 91574, 3396, 26589, 10240
GO:0042101	T cell receptor complex	GOCC	25	yes	-0.2973	0.742821	2.46e-07	3.34e-06	down	214, 920, 916, 8915, 925, 926, 923, 915, 7535, 54518, 919, 917, 50852
GO:0050900	leukocyte migration	GOBP	397	yes	-0.139332	0.869939	8.43e-08	3.44e-06	down	972, 301, 960, 50848, 3655, 483, 8140, 3685, 3383, 4283, 6520, 7412, 2885, 6278, 1893, 4318, 6464, 29, 3689, 7852, 11151, 3965, 6364, 6352, 4312, 5880, 5420, 79148, 50512, 4254, 5295, 3265, 101, 51119, 79902, 6363, 1435, 29108, 8764, 3635, 11240, 57580, 3683, 81704, 5293, 3055, 914, 6404, 2321, 3071, 3603, 2534, 5142, 5627, 27342, 3684, 6402, 3570, 1907, 7984, 63940, 3932, 962, 3695, 64005, 6693,…
GO:0032543	mitochondrial translation	GOBP	143	yes	0.289448	1.33569	8.89e-08	3.6e-06	up	11222, 51021, 85476, 6182, 51073, 51081, 57129, 64960, 55052, 51116, 64928, 56945, 6183, 55157, 4528, 54948, 219927, 80222, 124454, 92399, 118487, 65080, 54534, 10884, 91574, 3396, 26589, 84769, 10240
GO:0001637	G-protein coupled chemoattractant receptor activity	GOMF	30	yes	-0.308656	0.734434	7.03e-08	4.2e-06	down	7852, 1234, 1236, 10663, 2833, 1235, 643, 729230, 1233, 1524, 3579, 1237, 2826, 3577, 2829
GO:0004950	chemokine receptor activity	GOMF	30	yes	-0.308656	0.734434	7.03e-08	4.2e-06	down	7852, 1234, 1236, 10663, 2833, 1235, 643, 729230, 1233, 1524, 3579, 1237, 2826, 3577, 2829
GO:0044452	nucleolar part	GOCC	69	yes	0.341744	1.4074	3.44e-07	4.59e-06	up	1736, 23481, 55651, 65083, 55505, 5437, 23160, 84916, 10199, 10248, 92856, 51547, 9136, 55759, 10799, 10849
GO:0001959	regulation of cytokine-mediated signaling pathway	GOBP	123	yes	-0.189497	0.827375	1.16e-07	4.59e-06	down	972, 2950, 330, 11140, 3459, 3091, 7850, 7132, 6091, 8887, 1893, 3460, 7128, 7297, 9021, 6352, 7186, 5788, 1435, 10555, 29108, 11240, 7185, 558, 11274, 7444, 59307, 3717, 3656, 27342, 3455, 11213, 8651, 25999, 6586, 2150, 3569, 7124, 171392, 5468, 117854, 260434, 26228, 7294, 353376
GO:0050851	antigen receptor-mediated signaling pathway	GOBP	213	yes	-0.164386	0.848415	1.31e-07	5.14e-06	down	100423062, 5708, 4792, 5700, 10197, 5707, 5686, 5713, 4790, 5717, 7334, 4690, 5058, 9564, 5788, 920, 5295, 3265, 5718, 5716, 596, 3635, 973, 23180, 2533, 916, 11119, 5293, 8915, 3071, 2534, 3937, 5142, 5795, 56940, 3932, 9404, 57181, 54923, 915, 7454, 150372, 1236, 27040, 50943, 7535, 5579, 919, 974, 89857, 3702, 11314, 695, 1493, 930, 84174, 26191, 940, 54900, 917, 53347, 4773, 387357, 640, 9402…
GO:0035094	response to nicotine	GOBP	37	yes	-0.263859	0.768082	1.34e-07	5.22e-06	down	7412, 4790, 596, 6770, 23657, 7124, 1268, 1139, 8973, 1137
GO:0008320	protein transmembrane transporter activity	GOMF	27	yes	0.492481	1.63637	1.08e-07	5.9e-06	up	4170, 5901, 9868, 10452, 10204, 100287932, 4891, 10440, 23480, 563
GO:0070125	mitochondrial translational elongation	GOBP	86	yes	0.315513	1.37096	1.57e-07	6.08e-06	up	11222, 51021, 85476, 6182, 51073, 51081, 57129, 64960, 55052, 64928, 56945, 6183, 54948, 219927, 118487, 65080, 54534, 10884, 3396, 26589, 10240
GO:0002449	lymphocyte mediated immunity	GOBP	205	yes	-0.163776	0.848932	1.75e-07	6.74e-06	down	972, 100423062, 10383, 5052, 3383, 1075, 53833, 1739, 11151, 3965, 1604, 7186, 55061, 5788, 6318, 9466, 5817, 3635, 958, 23180, 355, 57823, 8915, 925, 54440, 56940, 51010, 9025, 64005, 6693, 3426, 3902, 7454, 939, 118460, 50943, 7409, 7292, 5452, 10225, 3981, 80328, 727, 730, 1380, 114836, 10538, 3575, 695, 135250, 84174, 1235, 3569, 940, 3594, 3077, 733, 4068, 51561, 6556, 23529, 200558, 6504, 7…
GO:0009123	nucleoside monophosphate metabolic process	GOBP	381	yes	0.202389	1.22432	1.87e-07	7.11e-06	up	2597, 226, 7167, 5230, 6774, 5223, 518, 54205, 3091, 2987, 8833, 3099, 9414, 4710, 523, 10476, 5214, 9611, 5209, 1739, 10105, 4711, 9551, 353, 93974, 4625, 4719, 7372, 29796, 4204, 2026, 205, 11164, 57017, 4702, 3251, 55967, 7298, 272, 7378, 260425, 54949, 4731, 4718, 5208, 4907, 5210, 1497, 51103, 122622, 5158, 4355, 1723, 56953, 1740, 525
GO:0005216	ion channel activity	GOMF	466	yes	-0.145685	0.86443	1.62e-07	8.2e-06	down	1192, 9635, 801, 7417, 3685, 56262, 6337, 2568, 1739, 309, 6509, 5310, 54499, 23258, 1536, 57620, 80228, 6338, 90550, 53826, 357, 8514, 83988, 338440, 80131, 9424, 3708, 55129, 1193, 115019, 2903, 6340, 51063, 51393, 125111, 782, 3772, 3749, 84329, 2906, 6263, 8645, 57156, 486, 79041, 63895, 94015, 55503, 30818, 255231, 3750, 27092, 3786, 3762, 23416, 121601, 54831, 8989, 54207, 3779, 3768, 3738,…
GO:0015980	energy derivation by oxidation of organic compounds	GOBP	334	yes	0.212008	1.23616	2.18e-07	8.2e-06	up	5500, 801, 37, 4191, 54205, 3091, 4609, 207, 3572, 4710, 2932, 4711, 5836, 7360, 2997, 2108, 4719, 9238, 29796, 4204, 5257, 2992, 57017, 4702, 55967, 664, 1737, 54949, 8803, 4731, 7262, 4718, 3667, 60493, 5255, 9945, 51103, 5507, 89801, 5167, 9365, 648791, 130752
GO:0005840	ribosome	GOCC	264	yes	0.210163	1.23388	6.58e-07	8.63e-06	up	6152, 6165, 11224, 27230, 6238, 6730, 11222, 51021, 1965, 4690, 23185, 6182, 29803, 51073, 51081, 57129, 64960, 55052, 51116, 64928, 56945, 6183, 5610, 54948, 219927, 200916, 118487, 65080, 54534, 10884, 91574, 3396, 26589, 10196, 84769, 10240, 26747, 63899, 83694
GO:0005261	cation channel activity	GOMF	321	yes	-0.162898	0.849678	1.92e-07	9.02e-06	down	3685, 6337, 5310, 54499, 23258, 57620, 80228, 6338, 90550, 357, 8514, 9424, 3708, 55129, 2903, 6340, 51063, 51393, 782, 3772, 3749, 84329, 6263, 8645, 57156, 79041, 55503, 30818, 255231, 3750, 27092, 3786, 3762, 23416, 8989, 54207, 3779, 3768, 3738, 9312, 6335, 1258, 3359, 3766, 1139, 3743, 3737, 55800, 9196, 8973, 56659, 3756, 30819, 1259, 343450, 778, 123041, 10021, 9629, 8913, 1137, 25769, 547…
GO:1903555	regulation of tumor necrosis factor superfamily cytokine production	GOBP	107	yes	-0.198886	0.819643	2.63e-07	9.72e-06	down	2950, 10457, 4057, 3065, 7128, 3965, 10564, 5295, 101, 6363, 1536, 55773, 29108, 148022, 558, 914, 54440, 3717, 7097, 11213, 6693, 50943, 7096, 23208, 948, 197358, 26191, 64170, 51561, 3670, 4157, 6504, 729230, 54106, 2841, 1139, 51738
GO:0002822	regulation of adaptive immune response based on somatic recombination of immune receptors built from immunoglobulin superfamily domains	GOBP	115	yes	-0.194025	0.823637	3.07e-07	1.13e-05	down	301, 53833, 7128, 7186, 5788, 5585, 920, 9466, 6363, 5817, 958, 3718, 54440, 56940, 51010, 6693, 90865, 7454, 118460, 50943, 7292, 10673, 3575, 695, 3569, 940, 3594, 3077, 51561, 6556, 23529, 200558, 6504, 7124, 2205, 729230, 2208, 30009, 4049, 941, 10666, 115650, 259197, 3592, 6375, 8995
GO:0002703	regulation of leukocyte mediated immunity	GOBP	148	yes	-0.178512	0.836514	3.09e-07	1.13e-05	down	53833, 29, 3965, 6813, 7186, 5880, 5788, 6318, 9466, 5817, 958, 3718, 54440, 56940, 27342, 51010, 57102, 6693, 2150, 3902, 7454, 8832, 118460, 50943, 7409, 7535, 7292, 10225, 2268, 11314, 114836, 3575, 695, 3569, 940, 3594, 3077, 4068, 51561, 2624, 23529, 200558, 6504, 7124, 2205, 729230, 56253, 2208, 146850, 30009, 4049, 10666, 259197, 3592, 117157, 6375
GO:0043241	protein complex disassembly	GOBP	253	yes	0.208471	1.23179	3.4e-07	1.22e-05	up	1072, 6418, 3159, 11034, 829, 8775, 5756, 6712, 5119, 29766, 11222, 2932, 57132, 9525, 27243, 327, 51021, 88, 830, 27183, 23332, 51510, 6182, 51073, 51081, 1855, 57129, 64960, 51534, 91782, 55052, 64928, 56945, 5341, 25978, 6183, 9037, 50861, 64780, 55239, 664, 54948, 219927, 92399, 118487, 65080, 54534, 10884, 11213, 91574, 3396, 6588, 26589, 2150, 57026, 10240, 442721, 146206, 57159, 89780, 712…
GO:0032984	macromolecular complex disassembly	GOBP	266	yes	0.203992	1.22629	3.55e-07	1.27e-05	up	1072, 6418, 3159, 11034, 829, 8775, 5756, 6712, 5119, 29766, 11222, 2932, 57132, 9525, 27243, 327, 51021, 88, 830, 27183, 23332, 51510, 6182, 51073, 51081, 1855, 57129, 64960, 3831, 51534, 91782, 55052, 64928, 56945, 5341, 11240, 25978, 6183, 9037, 50861, 64780, 55239, 4528, 664, 54948, 219927, 92399, 118487, 65080, 54534, 10884, 11213, 91574, 3396, 6588, 26589, 2150, 57026, 10240, 442721, 146206…
GO:0043368	positive T cell selection	GOBP	25	yes	-0.278811	0.756683	3.95e-07	1.4e-05	down	972, 596, 8456, 1794, 915, 3662, 50943, 7535, 114836, 10538, 3569, 3594, 51561, 4063, 387357, 8995
GO:1902105	regulation of leukocyte differentiation	GOBP	219	yes	-0.155602	0.8559	4.09e-07	1.44e-05	down	972, 301, 4323, 4057, 3659, 678, 4609, 51043, 3965, 10221, 7071, 4860, 1051, 760, 4254, 5295, 101, 6363, 1435, 441478, 3398, 3635, 1021, 3718, 558, 355, 9770, 914, 84293, 54440, 3071, 9308, 286410, 8456, 4602, 10272, 3662, 939, 150372, 50943, 7535, 6935, 7292, 3600, 2323, 3559, 84524, 3575, 140685, 695, 1493, 3569, 940, 3594, 51561, 2624, 54997, 22806, 7124, 171392, 3574, 8808, 146850, 941, 9290,…
GO:0006399	tRNA metabolic process	GOBP	259	yes	0.234108	1.26378	4.39e-07	1.53e-05	up	3735, 2975, 2617, 9328, 2193, 64118, 2976, 833, 55226, 10056, 24140, 26995, 79876, 112495, 55157, 54913, 10248, 23016, 23404, 1478, 80222, 124454, 10898, 51605, 51010, 80324, 7965, 115708, 11340, 79693, 4234, 9836, 27079, 123263, 10799
GO:0002443	leukocyte mediated immunity	GOBP	273	yes	-0.145616	0.864489	4.74e-07	1.65e-05	down	972, 100423062, 10383, 5052, 3383, 1075, 53833, 29, 1739, 11151, 3965, 6813, 1604, 7186, 5880, 55061, 5788, 6318, 9466, 6844, 5817, 3635, 958, 3718, 23180, 355, 57823, 5293, 8915, 925, 54440, 56940, 27342, 51010, 57102, 9025, 64005, 6693, 3426, 3815, 2150, 3902, 7454, 939, 8832, 118460, 27040, 50943, 7409, 7535, 7292, 5452, 10225, 2268, 3981, 80328, 727, 730, 11314, 1380, 114836, 10538, 3575, 695…
GO:0019724	B cell mediated immunity	GOBP	96	yes	-0.198544	0.819924	4.84e-07	1.67e-05	down	972, 100423062, 1604, 55061, 9466, 3635, 958, 355, 8915, 51010, 9025, 3426, 939, 118460, 50943, 7292, 5452, 3981, 727, 730, 1380, 10538, 695, 84174, 1235, 940, 733, 23529, 200558, 7124, 2205, 2208, 30009, 4049, 959, 10666, 6375, 10747, 57379
GO:0022838	substrate-specific channel activity	GOMF	474	yes	-0.141448	0.868101	3.91e-07	1.77e-05	down	360, 1192, 9635, 801, 7417, 3685, 56262, 6337, 2568, 1739, 309, 6509, 5310, 54499, 23258, 1536, 57620, 80228, 6338, 90550, 53826, 357, 8514, 83988, 338440, 80131, 9424, 3708, 55129, 1193, 115019, 2903, 6340, 51063, 51393, 125111, 782, 3772, 3749, 84329, 2906, 6263, 8645, 57156, 486, 79041, 63895, 94015, 55503, 30818, 362, 255231, 3750, 27092, 3786, 3762, 23416, 121601, 54831, 8989, 54207, 3779, 3…
GO:0009126	purine nucleoside monophosphate metabolic process	GOBP	355	yes	0.202256	1.22416	5.29e-07	1.81e-05	up	2597, 226, 7167, 5230, 6774, 5223, 518, 54205, 3091, 2987, 8833, 3099, 9414, 4710, 523, 10476, 5214, 9611, 5209, 1739, 10105, 4711, 9551, 353, 93974, 4625, 4719, 29796, 4204, 2026, 205, 11164, 57017, 4702, 3251, 55967, 272, 260425, 54949, 4731, 4718, 5208, 4907, 5210, 1497, 51103, 122622, 5158, 4355, 1740, 525
GO:0009167	purine ribonucleoside monophosphate metabolic process	GOBP	355	yes	0.202256	1.22416	5.29e-07	1.81e-05	up	2597, 226, 7167, 5230, 6774, 5223, 518, 54205, 3091, 2987, 8833, 3099, 9414, 4710, 523, 10476, 5214, 9611, 5209, 1739, 10105, 4711, 9551, 353, 93974, 4625, 4719, 29796, 4204, 2026, 205, 11164, 57017, 4702, 3251, 55967, 272, 260425, 54949, 4731, 4718, 5208, 4907, 5210, 1497, 51103, 122622, 5158, 4355, 1740, 525
hsa04660	T cell receptor signaling pathway	KEGG	102	yes	-0.190475	0.826567	6.87e-07	1.84e-05	down	4792, 2885, 207, 1739, 2932, 4790, 5603, 4690, 5058, 7410, 5788, 5604, 8503, 920, 5295, 3265, 9020, 56924, 916, 5293, 8915, 925, 4794, 2534, 3937, 10000, 926, 3932, 1326, 915, 27040, 7409, 7535, 919, 3702, 1493, 5133, 63928, 940, 29851, 5294, 917, 4773, 7124, 9402, 959, 5063
GO:0002285	lymphocyte activation involved in immune response	GOBP	138	yes	-0.179847	0.835398	5.41e-07	1.84e-05	down	301, 3383, 3936, 11151, 3965, 5971, 9466, 6363, 958, 3718, 3683, 51010, 4602, 9025, 28514, 2150, 3662, 118460, 1880, 5734, 50943, 54518, 7292, 9452, 3981, 114836, 10538, 1235, 3569, 940, 3594, 8809, 51561, 4064, 4063, 6556, 23529, 200558, 8320, 30009, 941, 959, 1015, 8995, 57379
GO:0050707	regulation of cytokine secretion	GOBP	130	yes	-0.180387	0.834947	5.85e-07	1.98e-05	down	301, 7850, 3965, 307, 79792, 6363, 1436, 29108, 22861, 8764, 8692, 914, 7097, 27342, 8651, 22900, 10385, 2150, 7100, 90865, 1236, 5734, 50943, 7292, 3604, 7096, 2268, 23208, 10333, 727, 79679, 26191, 3569, 81793, 6504, 7124, 117854, 56253, 260434, 54106, 2867, 3357, 283420, 3605
GO:0070126	mitochondrial translational termination	GOBP	89	yes	0.301303	1.35162	5.86e-07	1.98e-05	up	11222, 51021, 6182, 51073, 51081, 57129, 64960, 55052, 64928, 56945, 6183, 54948, 219927, 92399, 118487, 65080, 54534, 10884, 91574, 3396, 26589, 10240
GO:0002821	positive regulation of adaptive immune response	GOBP	79	yes	-0.211324	0.809512	6.19e-07	2.08e-05	down	301, 3572, 7186, 920, 9466, 6363, 5817, 29108, 958, 54440, 51010, 23411, 118460, 50943, 7292, 10673, 695, 3569, 940, 3594, 51561, 6556, 23529, 7124, 2205, 729230, 2208, 30009, 4049, 941, 10666, 115650, 259197, 3592, 6375
GO:0032735	positive regulation of interleukin-12 production	GOBP	31	yes	-0.263976	0.767992	6.37e-07	2.12e-05	down	3659, 3620, 3965, 6363, 958, 7097, 4050, 3394, 1236, 7292, 948, 51561, 3670, 54106, 959
GO:0000313	organellar ribosome	GOCC	94	yes	0.309695	1.36301	1.77e-06	2.18e-05	up	11222, 51021, 6182, 51081, 57129, 64960, 55052, 51116, 56945, 6183, 54948, 219927, 118487, 91574, 3396, 26589, 84769, 10240, 63899
GO:0005761	mitochondrial ribosome	GOCC	94	yes	0.309695	1.36301	1.77e-06	2.18e-05	up	11222, 51021, 6182, 51081, 57129, 64960, 55052, 51116, 56945, 6183, 54948, 219927, 118487, 91574, 3396, 26589, 84769, 10240, 63899
GO:0009144	purine nucleoside triphosphate metabolic process	GOBP	316	yes	0.205812	1.22852	6.78e-07	2.24e-05	up	2597, 226, 7167, 5230, 6774, 5223, 518, 54205, 3091, 2987, 2773, 3099, 4710, 523, 10476, 5214, 9611, 5209, 10105, 4711, 9551, 93974, 4625, 4719, 29796, 4204, 2026, 205, 11164, 57017, 4702, 3704, 55967, 272, 54949, 4731, 55270, 4718, 5208, 5210, 1497, 51103, 525
GO:0044455	mitochondrial membrane part	GOCC	238	yes	0.223722	1.25072	1.87e-06	2.27e-05	up	518, 56901, 4710, 10476, 4976, 9868, 10105, 4711, 10452, 9551, 93974, 4719, 29796, 401505, 9556, 100287932, 622, 4702, 10440, 55967, 23761, 664, 80273, 90550, 4731, 4718, 54968, 55013, 139322, 51103, 6770, 125965, 6663, 23098
GO:0006414	translational elongation	GOBP	137	yes	0.257167	1.29326	7e-07	2.29e-05	up	9775, 51714, 11222, 51021, 85476, 6182, 51073, 29904, 51081, 57129, 64960, 55052, 64928, 56945, 6183, 54948, 1917, 219927, 118487, 65080, 54534, 10884, 91574, 3396, 79693, 26589, 10240
GO:0070098	chemokine-mediated signaling pathway	GOBP	58	yes	-0.22298	0.800131	7e-07	2.29e-05	down	4283, 3091, 6091, 7852, 6364, 6352, 6363, 11240, 6586, 1234, 1236, 10663, 2833, 1235, 643, 729230, 6357, 1233, 1524, 3579, 1237, 2826, 6375, 6846, 10344, 3577, 2829
GO:0030684	preribosome	GOCC	76	yes	0.307088	1.35946	1.98e-06	2.36e-05	up	23481, 65083, 10199, 51118, 88745, 10436, 54881, 51388, 92856, 27042, 79080, 84946, 9136, 55759
GO:0030888	regulation of B cell proliferation	GOBP	50	yes	-0.233247	0.791958	7.33e-07	2.38e-05	down	972, 5788, 5585, 148022, 51237, 596, 3635, 958, 472, 54440, 3071, 57181, 1880, 10673, 11314, 1493, 89780, 7293, 22806, 23529, 4773, 3574, 23495, 115650
GO:0060271	cilium morphogenesis	GOBP	228	yes	-0.155332	0.856131	7.5e-07	2.41e-05	down	3911, 3983, 5108, 9114, 10938, 57216, 64422, 25930, 1874, 51382, 84747, 117178, 63917, 85014, 54874, 129880, 403, 51098, 153241, 10257, 115704, 26160, 582, 55835, 79867, 9742, 9662, 200894, 9001, 85302, 23116, 79809, 57728, 755, 80199, 79140, 57539, 54806, 79600, 27241, 138639, 79734, 91147, 55329, 80776, 84140, 8100, 79583, 25981, 91978, 23329, 55582, 79989, 54558, 5991, 199223, 10677, 79925, 64…
GO:0042273	ribosomal large subunit biogenesis	GOBP	68	yes	0.333976	1.39651	7.5e-07	2.41e-05	up	6152, 6165, 11224, 23481, 55651, 4839, 23560, 55052, 54881, 51388, 51491, 55759, 55794
GO:0016655	oxidoreductase activity, acting on NAD(P)H, quinone or similar compound as acceptor	GOMF	58	yes	0.356447	1.42825	5.53e-07	2.42e-05	up	56901, 4710, 4711, 1728, 4719, 4702, 1646, 51181, 55967, 1645, 4731, 4718, 8644, 4835
GO:0071706	tumor necrosis factor superfamily cytokine production	GOBP	111	yes	-0.191894	0.825394	7.84e-07	2.51e-05	down	2950, 10457, 4057, 3065, 7128, 3965, 10564, 5295, 101, 6363, 1536, 55773, 29108, 148022, 558, 8915, 914, 54440, 3717, 7097, 11213, 6693, 50943, 7096, 23208, 948, 197358, 26191, 64170, 51561, 3670, 4157, 6504, 729230, 54106, 2841, 1139, 51738
GO:0032680	regulation of tumor necrosis factor production	GOBP	102	yes	-0.195338	0.822556	8.21e-07	2.62e-05	down	2950, 10457, 4057, 3065, 7128, 3965, 10564, 5295, 6363, 1536, 55773, 29108, 148022, 558, 914, 54440, 3717, 7097, 11213, 6693, 50943, 7096, 23208, 948, 197358, 26191, 64170, 51561, 3670, 4157, 6504, 729230, 54106, 2841, 1139, 51738
GO:0002429	immune response-activating cell surface receptor signaling pathway	GOBP	310	yes	-0.137588	0.871458	8.31e-07	2.62e-05	down	71, 100423062, 3320, 5708, 4792, 10787, 2885, 4620, 10552, 5700, 10197, 5747, 5707, 5359, 5686, 5713, 10006, 4790, 5717, 7334, 4690, 5971, 5058, 7410, 9564, 5788, 920, 5295, 3265, 7456, 5718, 5716, 596, 3635, 973, 23180, 2533, 916, 11119, 10454, 5293, 8915, 3055, 26999, 5567, 3071, 2534, 3937, 5142, 5795, 56940, 3385, 27342, 3932, 9404, 57181, 64005, 54923, 915, 7454, 150372, 1236, 27040, 50943, …
GO:0022884	macromolecule transmembrane transporter activity	GOMF	30	yes	0.45286	1.5728	6.21e-07	2.63e-05	up	4170, 5901, 9868, 10452, 10204, 100287932, 4891, 10440, 23480, 563
GO:0050802	circadian sleep/wake cycle, sleep	GOBP	14	yes	-0.316135	0.728961	8.56e-07	2.69e-05	down	8863, 5730, 6770, 3569, 3737, 51738
GO:0048302	regulation of isotype switching to IgG isotypes	GOBP	8	yes	-0.352494	0.702933	8.89e-07	2.78e-05	down	9466, 958, 50943, 940, 30009
GO:0060759	regulation of response to cytokine stimulus	GOBP	129	yes	-0.177461	0.837394	8.99e-07	2.8e-05	down	972, 2950, 330, 9314, 11140, 3459, 3091, 83666, 7850, 7132, 6091, 8887, 1893, 3460, 7128, 7297, 9021, 6352, 7186, 5788, 1435, 10555, 29108, 11240, 7185, 558, 11274, 7444, 59307, 3717, 3656, 27342, 3455, 11213, 8651, 25999, 6586, 2150, 3569, 7124, 171392, 5468, 117854, 260434, 26228, 7294, 353376
GO:0043367	CD4-positive, alpha-beta T cell differentiation	GOBP	62	yes	-0.222177	0.800773	1e-06	3.1e-05	down	301, 51043, 3965, 5971, 6363, 5075, 3718, 54440, 3071, 9308, 4602, 3662, 1880, 5734, 50943, 7292, 26279, 114836, 10538, 3569, 3594, 8809, 51561, 4063, 2529, 941, 8995
GO:0032640	tumor necrosis factor production	GOBP	105	yes	-0.193079	0.824417	1.01e-06	3.1e-05	down	2950, 10457, 4057, 3065, 7128, 3965, 10564, 5295, 6363, 1536, 55773, 29108, 148022, 558, 914, 54440, 3717, 7097, 11213, 6693, 50943, 7096, 23208, 948, 197358, 26191, 64170, 51561, 3670, 4157, 6504, 729230, 54106, 2841, 1139, 51738
GO:0000502	proteasome complex	GOCC	136	yes	0.313051	1.36759	2.78e-06	3.22e-05	up	5708, 5887, 5886, 29979, 5700, 10197, 5707, 5686, 7979, 5713, 5717, 5718, 5716, 84262, 51377, 90637
GO:1905369	endopeptidase complex	GOCC	136	yes	0.313051	1.36759	2.78e-06	3.22e-05	up	5708, 5887, 5886, 29979, 5700, 10197, 5707, 5686, 7979, 5713, 5717, 5718, 5716, 84262, 51377, 90637
GO:0043410	positive regulation of MAPK cascade	GOBP	485	yes	-0.119273	0.887565	1.05e-06	3.23e-05	down	972, 960, 3383, 11331, 4915, 6278, 4055, 6464, 1849, 27020, 6386, 10550, 2889, 7852, 3965, 6364, 6352, 7186, 3611, 200958, 5058, 1942, 7133, 57216, 10494, 5604, 9175, 7161, 4804, 55004, 11235, 5585, 4254, 54910, 3265, 1848, 2263, 5606, 5906, 101, 6363, 1436, 9020, 7164, 4214, 29108, 8829, 817, 8764, 7867, 958, 114897, 5610, 8324, 355, 10454, 10818, 4188, 9770, 2321, 3717, 5156, 408, 650, 56940, 4…
GO:0071806	protein transmembrane transport	GOBP	65	yes	0.347322	1.41527	1.08e-06	3.29e-05	up	3320, 4170, 5901, 9868, 10452, 10204, 6729, 100287932, 10440, 23480, 83752, 80273, 9409, 563, 5191
GO:0009617	response to bacterium	GOBP	441	yes	-0.121604	0.885499	1.09e-06	3.32e-05	down	100423062, 2950, 4069, 4057, 4792, 9516, 3065, 3383, 163351, 4283, 7412, 207, 6278, 5861, 7132, 4055, 4791, 3620, 7128, 51752, 7082, 29, 8795, 10804, 9536, 85236, 4790, 3965, 10221, 6364, 6352, 3516, 1604, 727897, 79792, 5467, 7133, 55971, 1051, 4804, 920, 9466, 19, 2519, 29108, 148022, 387695, 22861, 8764, 1439, 7867, 958, 558, 355, 8915, 59307, 3055, 3587, 3717, 5142, 4257, 7097, 3656, 57088, 1…
GO:0002768	immune response-regulating cell surface receptor signaling pathway	GOBP	346	yes	-0.131576	0.876713	1.12e-06	3.38e-05	down	71, 100423062, 3320, 5708, 801, 4792, 10787, 2885, 4620, 10552, 5700, 10197, 5747, 5707, 6464, 5359, 5686, 5713, 10006, 4790, 5717, 7334, 4690, 5971, 5058, 7410, 9564, 5788, 2217, 920, 5295, 3265, 7456, 5718, 5716, 4214, 596, 3635, 958, 973, 23180, 2533, 916, 11119, 10454, 5293, 8915, 3055, 26999, 5567, 3071, 2534, 3937, 5142, 5795, 56940, 3385, 27342, 3932, 9404, 57181, 64005, 3815, 54923, 915, …
GO:1902653	secondary alcohol biosynthetic process	GOBP	58	yes	0.366057	1.44204	1.24e-06	3.74e-05	up	1718, 7555, 2222, 2224, 47, 3157, 5447, 10682, 6307, 1717, 1595, 3422, 11161, 4597, 2246, 1066
GO:0030057	desmosome	GOCC	25	yes	0.419162	1.52069	3.39e-06	3.87e-05	up	64065, 3728, 5317, 1830, 5493, 11187, 2125, 1828, 79983, 5318, 1041, 1823
GO:0009205	purine ribonucleoside triphosphate metabolic process	GOBP	309	yes	0.203665	1.22589	1.31e-06	3.88e-05	up	2597, 226, 7167, 5230, 6774, 5223, 518, 54205, 3091, 2987, 2773, 3099, 4710, 523, 10476, 5214, 9611, 5209, 10105, 4711, 9551, 93974, 4625, 4719, 29796, 4204, 2026, 205, 11164, 57017, 4702, 3704, 55967, 272, 54949, 4731, 4718, 5208, 5210, 1497, 51103, 525
GO:0070469	respiratory chain	GOCC	126	yes	0.289954	1.33637	3.63e-06	4.09e-05	up	56901, 54205, 4710, 4711, 25994, 4719, 29796, 4702, 55967, 4731, 4718, 51103
hsa04210	Apoptosis	KEGG	81	yes	-0.196915	0.821261	1.99e-06	4.72e-05	down	330, 824, 4792, 54205, 207, 7132, 8837, 7157, 8795, 4790, 7186, 8503, 5295, 9020, 596, 1439, 355, 23052, 472, 5293, 5567, 10000, 3656, 11213, 8793, 5577, 63928, 1677, 5294, 7124, 356
GO:0002274	myeloid leukocyte activation	GOBP	148	yes	-0.169133	0.844397	1.64e-06	4.82e-05	down	972, 10537, 4055, 29, 5359, 3965, 6352, 6813, 3516, 727897, 5880, 5971, 6542, 1435, 6844, 29108, 148022, 8692, 57580, 5293, 914, 3937, 23210, 6688, 7097, 1794, 27342, 57102, 1907, 4345, 3815, 2150, 90865, 3662, 8832, 27040, 7535, 10202, 7096, 2268, 2323, 10333, 11314, 399, 10538, 695, 6283, 5294, 2624, 6556, 6504, 51284, 2205, 729230, 1524, 3579, 1268, 26228, 10666, 133396, 1269
GO:0009199	ribonucleoside triphosphate metabolic process	GOBP	314	yes	0.199481	1.22077	1.73e-06	5e-05	up	2597, 226, 7167, 5230, 6774, 5223, 518, 54205, 3091, 2987, 2773, 3099, 4710, 523, 10476, 5214, 9611, 5209, 10105, 4711, 9551, 93974, 4625, 4719, 29796, 4204, 2026, 205, 11164, 57017, 4702, 3704, 55967, 272, 54949, 4731, 4718, 5208, 5210, 1497, 51103, 525
GO:0016126	sterol biosynthetic process	GOBP	66	yes	0.353037	1.42338	1.74e-06	5e-05	up	1718, 7555, 2222, 2224, 47, 3157, 5447, 10682, 6307, 1717, 1595, 3422, 11161, 4597, 51700, 2246, 1066
GO:0033077	T cell differentiation in thymus	GOBP	63	yes	-0.212187	0.808813	1.75e-06	5e-05	down	972, 678, 101, 596, 1021, 8324, 355, 916, 23210, 8456, 1794, 6693, 915, 1236, 50943, 7535, 6935, 3981, 8325, 84524, 3575, 1235, 940
GO:0071594	thymocyte aggregation	GOBP	63	yes	-0.212187	0.808813	1.75e-06	5e-05	down	972, 678, 101, 596, 1021, 8324, 355, 916, 23210, 8456, 1794, 6693, 915, 1236, 50943, 7535, 6935, 3981, 8325, 84524, 3575, 1235, 940
GO:0022410	circadian sleep/wake cycle process	GOBP	15	yes	-0.306327	0.736146	1.77e-06	5.03e-05	down	8863, 5730, 6770, 3569, 3737, 51738
GO:1902107	positive regulation of leukocyte differentiation	GOBP	124	yes	-0.179209	0.835932	1.79e-06	5.08e-05	down	972, 301, 4323, 3965, 10221, 7071, 4860, 760, 4254, 101, 6363, 1435, 3398, 3635, 558, 54440, 3071, 9308, 286410, 4602, 939, 50943, 7535, 7292, 3600, 2323, 3559, 3575, 140685, 695, 3569, 3594, 51561, 54997, 7124, 3574, 8808, 146850, 941, 8600, 3592, 50604, 3605
GO:0045333	cellular respiration	GOBP	230	yes	0.23509	1.26502	1.8e-06	5.08e-05	up	4191, 54205, 3091, 4710, 4711, 2108, 4719, 9238, 29796, 4204, 57017, 4702, 55967, 664, 1737, 54949, 8803, 4731, 4718, 60493, 51103, 130752
GO:0043624	cellular protein complex disassembly	GOBP	201	yes	0.215763	1.24081	1.84e-06	5.18e-05	up	1072, 11034, 829, 8775, 5756, 6712, 29766, 11222, 9525, 327, 51021, 88, 830, 27183, 23332, 6182, 51073, 51081, 57129, 64960, 55052, 64928, 56945, 5341, 6183, 9037, 50861, 64780, 55239, 54948, 219927, 92399, 118487, 65080, 54534, 10884, 91574, 3396, 6588, 26589, 2150, 57026, 10240, 442721, 146206, 57159, 119, 10297, 2258, 10677, 9829
GO:0050704	regulation of interleukin-1 secretion	GOBP	30	yes	-0.262413	0.769193	1.87e-06	5.23e-05	down	7850, 3965, 79792, 6363, 29108, 22861, 22900, 1236, 260434
GO:0008076	voltage-gated potassium channel complex	GOCC	66	yes	-0.207386	0.812706	5.15e-06	5.65e-05	down	801, 2017, 6844, 8514, 9424, 26047, 3749, 8506, 30818, 3750, 3786, 3762, 6616, 6900, 3779, 3738, 9312, 3743, 3737, 1740, 3756, 30819, 343450
GO:0034705	potassium channel complex	GOCC	71	yes	-0.207386	0.812706	5.15e-06	5.65e-05	down	801, 2017, 6844, 8514, 9424, 26047, 3749, 8506, 30818, 3750, 3786, 3762, 6616, 6900, 3779, 3738, 9312, 3743, 3737, 1740, 3756, 30819, 343450
GO:0050871	positive regulation of B cell activation	GOBP	67	yes	-0.211148	0.809654	2.12e-06	5.88e-05	down	972, 100423062, 4323, 5788, 148022, 596, 3635, 958, 54440, 3071, 286410, 51010, 57181, 939, 118460, 1880, 7535, 7292, 10673, 695, 3569, 940, 89780, 7293, 23529, 4773, 3574, 30009, 115650
GO:0002544	chronic inflammatory response	GOBP	21	yes	-0.280902	0.755103	2.18e-06	5.99e-05	down	2697, 7412, 3620, 7128, 9536, 6352, 1051, 50943, 7124, 1524, 4049
GO:0046034	ATP metabolic process	GOBP	289	yes	0.20756	1.23067	2.24e-06	6.12e-05	up	2597, 226, 7167, 5230, 6774, 5223, 518, 54205, 3091, 2987, 3099, 4710, 523, 10476, 5214, 9611, 5209, 10105, 4711, 9551, 93974, 4625, 4719, 29796, 4204, 2026, 205, 11164, 57017, 4702, 55967, 272, 54949, 4731, 4718, 5208, 5210, 1497, 51103, 525
GO:0030595	leukocyte chemotaxis	GOBP	201	yes	-0.160043	0.852107	2.25e-06	6.14e-05	down	972, 301, 4283, 6278, 3689, 7852, 11151, 3965, 6364, 6352, 5880, 79148, 101, 51119, 79902, 6363, 1435, 11240, 57580, 5293, 2321, 3071, 3603, 5142, 3570, 1907, 7984, 63940, 3815, 2150, 1234, 1236, 4856, 1880, 120425, 7409, 57118, 727, 2833, 9420, 6283, 1235, 3569, 5294, 51561, 643, 54210, 729230, 6357, 1524, 8740, 2867, 3579, 8600, 2841, 26228, 3592, 6375, 6846, 8995, 10344, 3577, 1269
GO:0002695	negative regulation of leukocyte activation	GOBP	132	yes	-0.174179	0.840147	2.52e-06	6.76e-05	down	972, 301, 3659, 53833, 3620, 7128, 29, 1739, 3965, 1051, 5585, 441478, 3398, 8764, 3635, 3718, 558, 355, 472, 56940, 27342, 9306, 7301, 6693, 4345, 10385, 374403, 3902, 201633, 8832, 10461, 50943, 7292, 26279, 8654, 64092, 3559, 11314, 84524, 7940, 11326, 79679, 1493, 84174, 26191, 3077, 54900, 79626, 729230, 2796, 23495, 1268, 133396, 6375, 51083, 8995, 1269
GO:0016064	immunoglobulin mediated immune response	GOBP	93	yes	-0.191083	0.826064	2.74e-06	7.24e-05	down	972, 100423062, 1604, 55061, 9466, 3635, 958, 8915, 51010, 9025, 3426, 939, 118460, 50943, 7292, 5452, 3981, 727, 730, 1380, 10538, 695, 1235, 940, 733, 23529, 200558, 7124, 2205, 2208, 30009, 4049, 959, 10666, 6375, 10747, 57379
GO:1903706	regulation of hemopoiesis	GOBP	296	yes	-0.13352	0.87501	2.82e-06	7.39e-05	down	972, 301, 4323, 4057, 4792, 3659, 678, 3091, 4609, 23028, 51043, 3965, 10221, 2113, 56892, 7071, 4860, 1051, 760, 4254, 5295, 101, 6363, 1435, 441478, 2309, 3398, 3635, 1021, 3718, 5610, 558, 355, 9770, 914, 84293, 54440, 3071, 9308, 123169, 286410, 8456, 6688, 4602, 28514, 92, 10272, 3662, 939, 150372, 50943, 7535, 6935, 7292, 3600, 2323, 3559, 84524, 3575, 140685, 695, 1493, 3569, 940, 3594, 51…
GO:0022843	voltage-gated cation channel activity	GOMF	127	yes	-0.201325	0.817646	1.89e-06	7.52e-05	down	3685, 8514, 9424, 782, 3772, 3749, 84329, 8645, 3750, 27092, 3786, 3762, 23416, 3768, 3738, 9312, 1258, 3766, 3743, 3737, 9196, 3756, 30819, 1259, 343450, 778, 10021, 8913, 54714, 2917
hsa03013	RNA transport	KEGG	133	yes	0.25274	1.28755	3.9e-06	8.35e-05	up	1981, 5901, 6613, 8662, 1983, 8668, 9669, 8761, 1964, 9775, 11171, 22916, 9939, 1965, 10189, 1207, 8669, 1977, 1978, 9688, 51068, 4686, 59343, 1967, 79902, 9470, 54913, 10248, 1917, 10289, 8891, 79023, 10799, 132430
GO:0050866	negative regulation of cell activation	GOBP	149	yes	-0.166466	0.846651	3.29e-06	8.57e-05	down	972, 301, 3659, 53833, 3620, 7128, 29, 1739, 3965, 1051, 5585, 441478, 3398, 8764, 3635, 114897, 3718, 558, 355, 472, 5156, 56940, 27342, 9306, 7301, 6693, 4345, 10385, 374403, 3902, 201633, 8832, 10461, 50943, 7292, 114757, 26279, 8654, 64092, 3559, 11314, 84524, 7940, 11326, 239, 79679, 1493, 84174, 26191, 3077, 54900, 79626, 729230, 2796, 23495, 1268, 133396, 6375, 51083, 8995, 1269
GO:0042745	circadian sleep/wake cycle	GOBP	16	yes	-0.297272	0.742842	3.42e-06	8.85e-05	down	8863, 5730, 6770, 3569, 3737, 51738
GO:0001773	myeloid dendritic cell activation	GOBP	28	yes	-0.258723	0.772037	3.46e-06	8.9e-05	down	10537, 4055, 3516, 5971, 29108, 914, 6688, 1794, 3662, 10202, 2323, 10538, 6504
GO:0016651	oxidoreductase activity, acting on NAD(P)H	GOMF	118	yes	0.287336	1.33287	2.32e-06	8.95e-05	up	56901, 4710, 64359, 53905, 4711, 5447, 50506, 1728, 4719, 84817, 1536, 4702, 1646, 27158, 51181, 55967, 1645, 4731, 51700, 4718, 51167, 8644, 4835, 653361, 606495, 654817, 654816
hsa05320	Autoimmune thyroid disease	KEGG	12	yes	-0.307746	0.735102	4.72e-06	9.18e-05	down	958, 355, 5551, 7038, 1493, 940, 356, 941, 959
GO:0051186	cofactor metabolic process	GOBP	499	yes	0.164421	1.17871	3.58e-06	9.19e-05	up	2597, 226, 7167, 5230, 6319, 6774, 7086, 5223, 3945, 9524, 8566, 2194, 4191, 10135, 3091, 3099, 47, 51629, 5214, 9611, 262, 5209, 27430, 27249, 93974, 64834, 60481, 2181, 2180, 6576, 4860, 84532, 2026, 51144, 3163, 211, 51647, 79966, 4891, 644, 57017, 51071, 80308, 55191, 1646, 57019, 27158, 51181, 4597, 7298, 55163, 1371, 8942, 84191, 3141, 1737, 8803, 1645, 25902, 5860, 8514, 5208, 55316, 7390,…
hsa00190	Oxidative phosphorylation	KEGG	113	yes	0.268138	1.30753	5.17e-06	9.21e-05	up	518, 56901, 4710, 523, 10476, 533, 9550, 4711, 9114, 9551, 4719, 29796, 51382, 51606, 4702, 55967, 10063, 4731, 4718, 125965, 245973, 525
GO:0048291	isotype switching to IgG isotypes	GOBP	9	yes	-0.333198	0.716629	3.67e-06	9.39e-05	down	9466, 958, 50943, 940, 30009
GO:0008299	isoprenoid biosynthetic process	GOBP	29	yes	0.41938	1.52102	3.7e-06	9.41e-05	up	2222, 2224, 3157, 116150, 3422, 4597, 220, 8644, 10170, 23590, 8854, 64577
GO:0002683	negative regulation of immune system process	GOBP	343	yes	-0.126389	0.881272	3.73e-06	9.44e-05	down	972, 301, 7009, 3428, 4057, 4792, 29979, 3659, 4609, 53833, 3620, 7128, 29, 1739, 3965, 10221, 1604, 5788, 79148, 1051, 6318, 5585, 4254, 5295, 9466, 441478, 148022, 3398, 8764, 3635, 1021, 11240, 3718, 5610, 558, 355, 472, 8915, 123169, 5795, 56940, 27342, 11213, 92747, 9306, 28514, 9404, 7301, 6693, 4345, 10385, 2150, 374403, 10272, 3902, 90865, 3662, 201633, 8832, 4856, 5734, 10461, 50943, 729…
GO:0060042	retina morphogenesis in camera-type eye	GOBP	38	yes	-0.24384	0.783613	3.76e-06	9.49e-05	down	5764, 221935, 5797, 28514, 793, 112724, 54806, 50937, 30812, 6096, 286204, 5629, 5950
GO:0002824	positive regulation of adaptive immune response based on somatic recombination of immune receptors built from immunoglobulin superfamily domains	GOBP	75	yes	-0.204919	0.814713	3.98e-06	9.97e-05	down	301, 7186, 920, 9466, 6363, 5817, 958, 54440, 51010, 118460, 50943, 7292, 10673, 695, 3569, 940, 3594, 51561, 6556, 23529, 7124, 2205, 729230, 2208, 30009, 4049, 941, 10666, 115650, 259197, 3592, 6375
GO:0071804	cellular potassium ion transport	GOBP	141	yes	-0.171748	0.842192	4.03e-06	0.0001	down	483, 10723, 88, 9990, 6844, 6560, 8514, 9424, 388591, 9472, 3772, 3749, 3792, 845, 8645, 486, 79041, 84679, 30818, 3750, 3786, 3762, 23416, 54207, 3779, 389015, 3768, 3738, 9312, 1258, 3766, 3743, 3737, 9196, 56659, 3756, 30819, 1259, 51083, 343450, 10021, 64805, 54714
GO:0071805	potassium ion transmembrane transport	GOBP	141	yes	-0.171748	0.842192	4.03e-06	0.0001	down	483, 10723, 88, 9990, 6844, 6560, 8514, 9424, 388591, 9472, 3772, 3749, 3792, 845, 8645, 486, 79041, 84679, 30818, 3750, 3786, 3762, 23416, 54207, 3779, 389015, 3768, 3738, 9312, 1258, 3766, 3743, 3737, 9196, 56659, 3756, 30819, 1259, 51083, 343450, 10021, 64805, 54714
GO:0032613	interleukin-10 production	GOBP	44	yes	-0.233472	0.791779	4.05e-06	0.0001	down	53833, 3620, 3965, 28951, 29108, 3718, 54440, 9308, 7097, 28514, 2150, 3662, 201633, 50943, 7292, 3604, 940, 51561, 54106, 959, 6375
GO:0043021	ribonucleoprotein complex binding	GOMF	106	yes	0.270494	1.31061	2.73e-06	0.000102	up	29927, 7458, 9775, 6730, 83939, 5292, 58477, 23481, 1965, 3954, 54915, 51068, 51119, 6729, 253260, 4528, 80315, 92399, 91574, 3396, 55759, 137994
GO:0001771	immunological synapse formation	GOBP	12	yes	-0.311153	0.732602	4.32e-06	0.000106	down	1739, 6363, 81704, 1794, 5551, 923, 1236, 2047
GO:0032715	negative regulation of interleukin-6 production	GOBP	35	yes	-0.248698	0.779815	4.33e-06	0.000106	down	7128, 3635, 3071, 408, 27342, 11213, 10365, 50943, 23208, 197358, 26191, 6504, 7124, 54106, 1139, 51738
GO:0044782	cilium organization	GOBP	216	yes	-0.149418	0.861209	4.48e-06	0.00011	down	3911, 3983, 5108, 9114, 10938, 57216, 64422, 1874, 51382, 117178, 85014, 54874, 129880, 403, 153241, 10257, 115704, 26160, 582, 55835, 79867, 9742, 9662, 200894, 9001, 85302, 23116, 79809, 57728, 80199, 11020, 79140, 57539, 54806, 27241, 79734, 91147, 55329, 80776, 84140, 8100, 79583, 25981, 91978, 23329, 55582, 79989, 54558, 166379, 5991, 199223, 1258, 79925, 64284, 23639, 51364, 4117, 56171, 27…
GO:0071219	cellular response to molecule of bacterial origin	GOBP	154	yes	-0.162799	0.849762	4.61e-06	0.000112	down	2950, 4057, 4792, 9516, 3383, 207, 7128, 4790, 10221, 6364, 6352, 1604, 5467, 7133, 1051, 19, 29108, 148022, 958, 558, 59307, 3055, 5142, 7097, 3656, 57088, 3394, 8106, 923, 1234, 7100, 7292, 7096, 6770, 10333, 948, 27063, 26191, 3569, 4064, 1440, 7124, 1524, 941, 26228, 4360, 3592, 353376, 57379
GO:0046128	purine ribonucleoside metabolic process	GOBP	411	yes	0.167617	1.18248	5.24e-06	0.000126	up	2597, 226, 7167, 5230, 6774, 5223, 518, 54205, 3091, 2987, 8833, 2773, 3099, 9414, 4710, 523, 10476, 5214, 9611, 262, 5209, 1739, 10105, 4711, 9061, 9551, 353, 93974, 4860, 4625, 4719, 29796, 4204, 2026, 205, 51816, 4507, 11164, 57017, 4702, 3251, 55967, 272, 6820, 260425, 10380, 9060, 54949, 4731, 4718, 5208, 6783, 55, 4907, 5210, 1497, 51103, 122622, 22875, 5158, 4355, 161823, 5167, 1740, 10861…
GO:0040017	positive regulation of locomotion	GOBP	432	yes	-0.115926	0.890541	5.37e-06	0.000129	down	972, 3655, 4323, 3685, 80781, 3383, 4283, 8766, 6317, 3091, 207, 6278, 4193, 7803, 5747, 4318, 57111, 6386, 9806, 154810, 11151, 2152, 3965, 6364, 2113, 6352, 7205, 3611, 5880, 5058, 23332, 9564, 5788, 5420, 11235, 8613, 4254, 9423, 5295, 8650, 54910, 3265, 1954, 4233, 101, 6776, 6363, 1436, 1435, 29108, 8829, 596, 817, 8764, 1839, 57556, 9037, 29984, 83706, 5293, 2321, 22902, 3071, 3717, 3603, 5…
GO:0046703	natural killer cell lectin-like receptor binding	GOMF	9	yes	0.536252	1.70959	3.56e-06	0.00013	up	80328, 135250, 353091, 154064, 79465
GO:0032693	negative regulation of interleukin-10 production	GOBP	13	yes	-0.303721	0.738067	5.63e-06	0.000135	down	3620, 28951, 3718, 28514, 50943, 3604, 51561
GO:0002377	immunoglobulin production	GOBP	90	yes	-0.192531	0.824869	5.7e-06	0.000136	down	7009, 7186, 5788, 5585, 9466, 51237, 958, 355, 54440, 51010, 9025, 90865, 118460, 50943, 7292, 5452, 9452, 3981, 10673, 10538, 3575, 1235, 3569, 940, 54900, 7293, 23529, 200558, 7124, 30009, 29802, 959, 6375, 5950, 57379
GO:0046633	alpha-beta T cell proliferation	GOBP	22	yes	-0.27161	0.762151	5.71e-06	0.000136	down	3659, 3965, 1604, 8764, 916, 1794, 64926, 7535, 7292, 3600, 940, 51561, 729230, 10148, 941, 6375
GO:0016469	proton-transporting two-sector ATPase complex	GOCC	75	yes	0.337055	1.40082	1.37e-05	0.000144	up	518, 523, 10476, 533, 9550, 10105, 9114, 9551, 93974, 51382, 9556, 51606, 245973, 525
GO:0071378	cellular response to growth hormone stimulus	GOBP	24	yes	-0.277546	0.757641	6.22e-06	0.000147	down	6774, 5747, 5829, 5295, 6776, 3718, 3717, 8835, 6770, 5618, 51738
GO:0030216	keratinocyte differentiation	GOBP	126	yes	0.261877	1.29937	6.43e-06	0.000151	up	3868, 2810, 301, 360, 8626, 5493, 6699, 6698, 6700, 2125, 6278, 3858, 7051, 6704, 6703, 3516, 84518, 5604, 84283, 8394, 8796, 204219, 55506, 8456, 8644, 1041, 6705, 6706, 8689, 2069, 58495, 2312, 1594, 7062, 5453, 6701, 3849, 353133, 3890, 163778, 50604
GO:0048511	rhythmic process	GOBP	309	yes	-0.132828	0.875616	6.94e-06	0.00016	down	301, 4323, 5500, 3065, 3383, 4915, 10135, 5176, 7157, 22809, 4791, 9611, 2932, 10765, 2113, 5066, 5187, 7071, 4089, 5971, 1051, 8863, 4804, 4254, 5764, 7008, 2309, 3398, 596, 5730, 7298, 687, 558, 4800, 355, 9510, 3131, 5156, 408, 23411, 7301, 79365, 6586, 8403, 4327, 3815, 2099, 23373, 8851, 6770, 2069, 6092, 6096, 3569, 9099, 3625, 5468, 658, 5021, 3363, 2796, 1139, 3737, 5629, 4987, 9956, 6532…
GO:0051272	positive regulation of cellular component movement	GOBP	430	yes	-0.114906	0.89145	6.95e-06	0.00016	down	972, 3655, 4323, 3685, 80781, 3383, 4283, 8766, 6317, 3091, 207, 6278, 4193, 7803, 5747, 4318, 57111, 6386, 9806, 154810, 11151, 2152, 3965, 6364, 2113, 6352, 7205, 3611, 5880, 5058, 23332, 9564, 5788, 5420, 10630, 11235, 8613, 4254, 9423, 5295, 8650, 54910, 3265, 1954, 4233, 101, 6776, 6363, 1436, 1435, 29108, 8829, 596, 817, 8764, 1839, 57556, 9037, 29984, 83706, 5293, 2321, 22902, 3071, 3717, …
GO:0007249	I-kappaB kinase/NF-kappaB signaling	GOBP	301	yes	-0.131371	0.876892	7.15e-06	0.000164	down	2950, 8878, 5052, 330, 4057, 10537, 4792, 389, 10318, 9516, 2697, 10342, 7132, 8837, 4055, 1893, 4791, 7128, 8795, 81603, 4790, 3965, 56892, 7205, 7334, 7186, 5187, 5971, 54602, 28511, 11040, 79971, 10769, 6363, 5716, 9020, 29108, 148022, 57449, 958, 10454, 8915, 2534, 7097, 3656, 23411, 22900, 23390, 55504, 2150, 2099, 939, 1236, 4856, 5579, 6285, 10333, 948, 197358, 399, 695, 6283, 8809, 64170,…
GO:0006695	cholesterol biosynthetic process	GOBP	56	yes	0.349131	1.41784	7.17e-06	0.000164	up	1718, 7555, 2222, 2224, 47, 3157, 5447, 10682, 6307, 1717, 1595, 3422, 4597, 2246, 1066
hsa04380	Osteoclast differentiation	KEGG	123	yes	-0.165309	0.847632	1.01e-05	0.000166	down	8878, 4792, 2885, 3459, 207, 7132, 4791, 3460, 7297, 9021, 4790, 5603, 7186, 5971, 5604, 8503, 5295, 1436, 1435, 1536, 9020, 10454, 5293, 8061, 2534, 3937, 10000, 6688, 3455, 8651, 3932, 4689, 695, 55423, 5294, 653361, 4773, 7124, 5468, 8600, 2215
GO:0042278	purine nucleoside metabolic process	GOBP	415	yes	0.164603	1.17892	7.3e-06	0.000167	up	2597, 226, 7167, 5230, 6774, 5223, 518, 54205, 3091, 2987, 8833, 2773, 3099, 9414, 4710, 523, 10476, 5214, 9611, 262, 5209, 1739, 10105, 4711, 9061, 9551, 353, 93974, 4860, 4625, 4719, 29796, 4204, 2026, 205, 51816, 4507, 11164, 57017, 4702, 3251, 55967, 272, 6820, 260425, 10380, 9060, 54949, 4731, 4718, 5208, 6783, 55, 4907, 5210, 1497, 51103, 122622, 22875, 5158, 4355, 161823, 5167, 140733, 174…
GO:0045621	positive regulation of lymphocyte differentiation	GOBP	77	yes	-0.197147	0.82107	7.38e-06	0.000167	down	972, 301, 4323, 3965, 4860, 101, 6363, 3635, 558, 54440, 3071, 9308, 286410, 4602, 939, 50943, 7535, 7292, 3600, 2323, 3559, 3575, 695, 3569, 3594, 51561, 3574, 8808, 146850, 941, 3592
GO:0009119	ribonucleoside metabolic process	GOBP	443	yes	0.159118	1.17248	7.41e-06	0.000167	up	2597, 226, 7167, 5230, 6774, 5223, 518, 54205, 3091, 2987, 8833, 2773, 3099, 9414, 4710, 523, 10476, 5214, 9611, 262, 5209, 1739, 10105, 4711, 9061, 9551, 353, 93974, 4860, 4625, 4719, 7372, 29796, 4204, 2026, 205, 51816, 4507, 11164, 57017, 4702, 3251, 55967, 272, 7378, 6820, 260425, 10380, 60489, 9060, 54949, 4731, 4718, 5208, 6783, 55, 4907, 200316, 5210, 1497, 51103, 122622, 22875, 5158, 4355…
GO:0071826	ribonucleoprotein complex subunit organization	GOBP	234	yes	0.199916	1.2213	7.62e-06	0.000172	up	6152, 7458, 1778, 8662, 1983, 8668, 10480, 11171, 25804, 83939, 11168, 8607, 8683, 1207, 23405, 8669, 51081, 246175, 8872, 3831, 51119, 55052, 9129, 6733, 80153, 472, 55239, 4528, 51388, 83640, 92399, 55794, 84769, 26747, 201164, 135295, 56853
GO:0032652	regulation of interleukin-1 production	GOBP	57	yes	-0.212753	0.808356	7.88e-06	0.000177	down	301, 2950, 3428, 3065, 7850, 7128, 3965, 6364, 79792, 6363, 29108, 22861, 3717, 22900, 1236, 1903, 3670, 260434, 1139, 51738
GO:0034612	response to tumor necrosis factor	GOBP	262	yes	-0.133753	0.874806	7.9e-06	0.000177	down	2950, 5708, 330, 10537, 3065, 3383, 7412, 678, 7132, 8887, 5700, 10197, 4055, 5707, 7128, 8795, 5686, 5713, 6364, 6352, 5717, 7186, 51667, 7133, 4804, 84817, 5718, 6363, 5716, 9020, 2309, 29108, 8764, 8692, 958, 128178, 7185, 355, 3717, 4050, 23411, 25999, 55504, 2150, 10365, 939, 8793, 7292, 3604, 10673, 9966, 27063, 3373, 3569, 7293, 970, 8771, 7124, 171392, 608, 10913, 5105, 6357, 260434, 1896…
GO:0002360	T cell lineage commitment	GOBP	16	yes	-0.291388	0.747226	8.14e-06	0.000181	down	596, 8456, 3662, 50943, 114836, 10538, 3569, 3594, 51561, 4063, 3574, 8995
GO:0003743	translation initiation factor activity	GOMF	60	yes	0.346462	1.41406	5.12e-06	0.000182	up	1981, 7458, 8662, 1983, 8668, 9669, 10480, 1964, 83939, 1965, 8669, 1977, 1967, 9470, 4528, 10289, 8891
GO:0016712	oxidoreductase activity, acting on paired donors, with incorporation or reduction of molecular oxygen, reduced flavin or flavoprotein as one donor, and incorporation of one atom of oxygen	GOMF	16	yes	-0.308913	0.734245	5.43e-06	0.000187	down	260293, 1545, 1580, 1571, 66002, 1573, 199974
GO:0035710	CD4-positive, alpha-beta T cell activation	GOBP	70	yes	-0.204174	0.81532	8.48e-06	0.000188	down	301, 51043, 3965, 1604, 5971, 1051, 6363, 5075, 3718, 54440, 3071, 9308, 4602, 3662, 1880, 5734, 50943, 7292, 26279, 114836, 10538, 3569, 3594, 8809, 51561, 4063, 2529, 941, 6375, 8995
GO:0036037	CD8-positive, alpha-beta T cell activation	GOBP	15	yes	-0.295658	0.744042	8.61e-06	0.00019	down	3659, 51043, 596, 5075, 3071, 3077, 944, 8320, 2841, 6375
GO:0007204	positive regulation of cytosolic calcium ion concentration	GOBP	241	yes	-0.143955	0.865927	8.65e-06	0.000191	down	801, 10134, 4283, 2697, 27020, 7852, 11151, 2769, 9446, 5310, 1604, 5788, 920, 6363, 596, 817, 6717, 1756, 114897, 4644, 1043, 3717, 624, 5156, 10345, 55636, 1907, 3932, 3708, 1193, 2150, 1234, 2099, 9001, 1236, 5734, 1903, 9472, 2247, 4828, 948, 845, 6263, 2833, 6546, 930, 1235, 5294, 8698, 2624, 5587, 623, 5739, 729230, 8989, 1233, 5021, 3579, 10800, 4987, 5732, 1237, 1812, 2826, 147, 6375, 335…
GO:0005164	tumor necrosis factor receptor binding	GOMF	29	yes	-0.254324	0.775441	6.31e-06	0.000202	down	7186, 7185, 4050, 7292, 10673, 9966, 970, 7124, 944, 356, 1896, 8740, 4049, 8600, 959
GO:0048872	homeostasis of number of cells	GOBP	215	yes	-0.141837	0.867763	9.25e-06	0.000202	down	972, 301, 5052, 3091, 207, 53833, 7128, 29766, 23028, 11151, 3965, 2113, 93974, 5585, 4254, 10018, 1435, 5366, 4891, 2309, 3398, 596, 3635, 1021, 57599, 3718, 272, 558, 355, 9770, 8915, 54440, 3071, 3717, 5142, 23210, 8456, 6688, 10320, 924, 3815, 92, 10365, 1236, 4856, 27040, 1880, 50943, 2323, 6584, 10673, 3559, 84524, 3575, 3569, 27240, 2624, 3574, 608, 1233, 8740, 3579, 23495, 51301, 2322, 32…
GO:0009141	nucleoside triphosphate metabolic process	GOBP	344	yes	0.177924	1.19473	9.49e-06	0.000207	up	2597, 226, 7167, 5230, 6774, 5223, 518, 54205, 3091, 2987, 2773, 3099, 4710, 523, 10476, 5214, 9611, 5209, 10105, 4711, 9551, 93974, 4625, 4719, 29796, 4204, 2026, 205, 11164, 57017, 4702, 3704, 55967, 7298, 272, 50484, 54949, 4731, 55270, 4718, 5208, 5210, 1497, 51103, 5167, 158067, 525
GO:0036092	phosphatidylinositol-3-phosphate biosynthetic process	GOBP	37	yes	-0.232911	0.792224	9.55e-06	0.000208	down	2885, 8503, 5295, 2263, 200576, 472, 10818, 5293, 3631, 3667, 2247, 2246, 5294, 9365, 54106, 5288
GO:0005838	proteasome regulatory particle	GOCC	28	yes	0.406543	1.50162	2.01e-05	0.00021	up	5708, 5700, 5707, 7979, 5713, 5717, 5718, 5716
GO:0006403	RNA localization	GOBP	235	yes	0.200217	1.22167	1.06e-05	0.00023	up	5901, 7203, 908, 6950, 10694, 84248, 25946, 9775, 7979, 22916, 1736, 9939, 5902, 8607, 8683, 10189, 55651, 65083, 1977, 9785, 53981, 7528, 9688, 55505, 4686, 59343, 79902, 55677, 81608, 10644, 23180, 472, 55308, 23404, 79023, 51010, 8106, 64901, 10642, 3800
GO:0002507	tolerance induction	GOBP	22	yes	-0.273775	0.760503	1.09e-05	0.000234	down	3620, 7128, 3965, 916, 11213, 50943, 3559, 5133, 29851, 1233
GO:0022836	gated channel activity	GOMF	332	yes	-0.141626	0.867946	7.57e-06	0.000237	down	1192, 9635, 801, 7417, 3685, 6337, 2568, 1739, 309, 1536, 6338, 357, 8514, 83988, 338440, 9424, 3708, 55129, 1193, 2903, 6340, 782, 3772, 3749, 84329, 2906, 6263, 8645, 57156, 79041, 63895, 30818, 3750, 27092, 3786, 3762, 23416, 121601, 8989, 54207, 3779, 3768, 3738, 9312, 6335, 1258, 3359, 3766, 2561, 1139, 3743, 3737, 55800, 9196, 8973, 2563, 56659, 3756, 30819, 1259, 343450, 778, 10021, 9629, …
GO:0010455	positive regulation of cell fate commitment	GOBP	7	yes	-0.356165	0.700357	1.1e-05	0.000237	down	3516, 2247, 3594, 89780, 51561
GO:1905368	peptidase complex	GOCC	154	yes	0.265416	1.30397	2.31e-05	0.000238	up	5708, 5887, 23326, 5886, 29979, 5700, 10197, 5707, 5686, 7979, 5713, 2152, 5717, 5718, 5716, 84262, 51377, 90637
GO:0050663	cytokine secretion	GOBP	160	yes	-0.158042	0.853814	1.12e-05	0.000241	down	301, 7850, 5861, 3965, 307, 3516, 79792, 4860, 19, 6363, 1436, 29108, 22861, 8764, 8692, 11119, 914, 3937, 7097, 27342, 8651, 22900, 10385, 2150, 7100, 90865, 1236, 5734, 50943, 7292, 3604, 7096, 2268, 23208, 10333, 948, 727, 79679, 6283, 26191, 3569, 81793, 6504, 7124, 54210, 117854, 56253, 260434, 54106, 2867, 3357, 283420, 3605
GO:0005746	mitochondrial respiratory chain	GOCC	116	yes	0.279323	1.32223	2.4e-05	0.000243	up	56901, 4710, 4711, 4719, 29796, 4702, 55967, 4731, 4718, 51103
GO:0006816	calcium ion transport	GOBP	406	yes	-0.1251	0.882409	1.14e-05	0.000244	down	488, 801, 3685, 3383, 4283, 2697, 6520, 29979, 11151, 309, 6352, 55858, 9446, 5310, 54499, 5788, 29763, 920, 489, 6363, 23258, 596, 817, 27075, 57620, 6717, 1756, 80228, 4644, 90550, 2534, 5142, 55013, 10345, 55636, 3932, 3708, 1193, 6588, 1234, 9001, 10267, 8832, 1236, 2903, 9472, 5579, 51393, 782, 2247, 64072, 9456, 9914, 845, 6263, 6345, 6271, 6546, 930, 5294, 89780, 1594, 5587, 55503, 255231,…
GO:0046625	sphingolipid binding	GOMF	8	yes	-0.341694	0.710565	8.09e-06	0.000247	down	7186, 6402, 25999
GO:0042384	cilium assembly	GOBP	190	yes	-0.14905	0.861526	1.18e-05	0.000252	down	3911, 3983, 5108, 9114, 10938, 57216, 64422, 1874, 51382, 117178, 85014, 54874, 129880, 153241, 10257, 115704, 26160, 582, 55835, 79867, 9742, 9662, 200894, 9001, 85302, 23116, 57728, 80199, 79140, 57539, 54806, 27241, 79734, 91147, 55329, 80776, 84140, 8100, 79583, 25981, 91978, 23329, 55582, 79989, 54558, 5991, 79925, 64284, 23639, 51364, 4117, 56171, 27285
GO:0044224	juxtaparanode region of axon	GOCC	10	yes	-0.31872	0.727079	2.63e-05	0.000264	down	8514, 26047, 23136, 6900, 3737, 1740
GO:0051480	regulation of cytosolic calcium ion concentration	GOBP	259	yes	-0.139045	0.870189	1.25e-05	0.000266	down	801, 10134, 4283, 2697, 27020, 7852, 11151, 2769, 9446, 5310, 1604, 5788, 920, 6363, 596, 817, 6717, 1756, 114897, 4644, 1043, 3717, 624, 5156, 10345, 55636, 1907, 3932, 793, 3708, 1193, 2150, 1234, 2099, 9001, 1236, 5734, 1903, 9472, 2247, 64072, 4828, 948, 845, 6263, 5158, 2833, 6546, 930, 1235, 5294, 8698, 2624, 5587, 623, 5739, 729230, 8989, 1233, 5021, 3579, 1258, 159371, 794, 491, 10800, 49…
GO:0033209	tumor necrosis factor-mediated signaling pathway	GOBP	160	yes	-0.155194	0.856249	1.27e-05	0.000268	down	2950, 5708, 330, 7132, 8887, 5700, 10197, 4055, 5707, 7128, 8795, 5686, 5713, 5717, 7186, 7133, 4804, 84817, 5718, 5716, 9020, 2309, 29108, 8764, 958, 128178, 7185, 355, 3717, 4050, 25999, 55504, 2150, 939, 8793, 7292, 3604, 10673, 9966, 7293, 970, 8771, 7124, 171392, 608, 10913, 260434, 1896, 8740, 4049, 23495, 8600, 959, 115650, 8995
GO:0004930	G-protein coupled receptor activity	GOMF	289	yes	-0.139787	0.869544	9.04e-06	0.00027	down	51094, 79602, 7852, 10280, 53836, 9052, 57085, 27297, 8324, 53637, 387509, 624, 8843, 2150, 1234, 10267, 1236, 1880, 5734, 1903, 57121, 2550, 23432, 10663, 9294, 8325, 2833, 135, 2487, 29933, 1235, 7976, 8698, 643, 53829, 4157, 6752, 623, 8477, 2863, 117195, 5739, 5468, 2825, 27334, 29909, 729230, 165140, 115330, 1233, 5021, 1524, 2867, 2811, 2859, 3363, 3579, 53831, 1268, 9290, 2841, 84109, 2719…
GO:0098803	respiratory chain complex	GOCC	108	yes	0.289747	1.33609	2.75e-05	0.000272	up	56901, 4710, 4711, 4719, 29796, 4702, 55967, 4731, 4718, 51103
GO:0022618	ribonucleoprotein complex assembly	GOBP	224	yes	0.199491	1.22078	1.34e-05	0.000282	up	6152, 7458, 1778, 8662, 1983, 8668, 10480, 11171, 25804, 83939, 11168, 8607, 8683, 1207, 23405, 8669, 51081, 246175, 8872, 51119, 55052, 9129, 6733, 80153, 472, 55239, 51388, 83640, 55794, 84769, 26747, 135295, 56853
GO:1901657	glycosyl compound metabolic process	GOBP	498	yes	0.146682	1.15799	1.41e-05	0.000295	up	2597, 226, 7167, 5230, 6774, 5223, 518, 54205, 3091, 2987, 8833, 2773, 3099, 9414, 4710, 523, 10476, 5214, 9611, 262, 5209, 1739, 10105, 4711, 9061, 9551, 353, 93974, 1635, 4860, 4625, 4719, 7372, 29796, 4204, 2026, 205, 51816, 2519, 4507, 11164, 57017, 4702, 51071, 1646, 3251, 55967, 7298, 272, 7378, 6820, 260425, 10380, 60489, 9060, 54949, 1645, 4731, 4718, 5208, 8644, 6783, 55, 4907, 200316, 5…
GO:0043488	regulation of mRNA stability	GOBP	147	yes	0.228865	1.25717	1.5e-05	0.000313	up	7534, 1981, 4904, 6418, 5708, 7529, 10492, 678, 207, 5700, 10197, 5707, 5686, 5713, 5717, 246175, 5718, 5716, 167227, 23016, 23404, 51010, 11340, 118460, 10642, 340152, 6556
GO:0051250	negative regulation of lymphocyte activation	GOBP	113	yes	-0.172523	0.841539	1.56e-05	0.000324	down	972, 301, 3659, 53833, 3620, 7128, 1739, 3965, 1051, 5585, 441478, 3398, 8764, 3635, 3718, 558, 355, 472, 56940, 9306, 7301, 6693, 10385, 374403, 3902, 201633, 10461, 50943, 7292, 26279, 8654, 64092, 3559, 11314, 84524, 7940, 11326, 79679, 1493, 84174, 26191, 3077, 54900, 79626, 2796, 23495, 6375, 51083, 8995
GO:0071356	cellular response to tumor necrosis factor	GOBP	240	yes	-0.133999	0.874591	1.57e-05	0.000325	down	2950, 5708, 330, 3065, 3383, 7412, 678, 7132, 8887, 5700, 10197, 4055, 5707, 7128, 8795, 5686, 5713, 6364, 6352, 5717, 7186, 7133, 4804, 84817, 5718, 6363, 5716, 9020, 2309, 29108, 8764, 8692, 958, 128178, 7185, 355, 3717, 4050, 23411, 25999, 55504, 2150, 10365, 939, 8793, 7292, 3604, 10673, 9966, 27063, 3373, 3569, 7293, 970, 8771, 7124, 171392, 608, 10913, 5105, 6357, 260434, 1896, 8740, 4049, …
GO:0002287	alpha-beta T cell activation involved in immune response	GOBP	52	yes	-0.216624	0.805233	1.6e-05	0.000328	down	301, 3965, 5971, 6363, 3718, 4602, 3662, 1880, 5734, 50943, 7292, 114836, 10538, 3569, 3594, 8809, 51561, 4063, 8320, 941, 8995
GO:0002293	alpha-beta T cell differentiation involved in immune response	GOBP	52	yes	-0.216624	0.805233	1.6e-05	0.000328	down	301, 3965, 5971, 6363, 3718, 4602, 3662, 1880, 5734, 50943, 7292, 114836, 10538, 3569, 3594, 8809, 51561, 4063, 8320, 941, 8995
GO:2000147	positive regulation of cell motility	GOBP	412	yes	-0.111962	0.894079	1.67e-05	0.000339	down	972, 3655, 4323, 3685, 80781, 3383, 4283, 8766, 6317, 3091, 207, 6278, 4193, 7803, 5747, 4318, 57111, 6386, 9806, 154810, 11151, 2152, 3965, 6364, 2113, 6352, 7205, 3611, 5880, 5058, 23332, 9564, 5788, 5420, 11235, 8613, 4254, 9423, 5295, 8650, 54910, 3265, 4233, 101, 6776, 6363, 1436, 1435, 29108, 8829, 596, 817, 8764, 1839, 57556, 9037, 29984, 83706, 5293, 2321, 22902, 3071, 3717, 5156, 650, 64…
GO:0070857	regulation of bile acid biosynthetic process	GOBP	6	yes	-0.352048	0.703247	1.76e-05	0.000356	down	23411, 6770, 5629
GO:0043374	CD8-positive, alpha-beta T cell differentiation	GOBP	10	yes	-0.313277	0.731048	1.84e-05	0.000372	down	3659, 51043, 596, 5075, 3071, 944, 8320, 2841
GO:0005865	striated muscle thin filament	GOCC	21	yes	0.40249	1.49554	3.97e-05	0.000383	up	7171, 7170, 58, 29766, 7136, 7134, 442721, 7139, 7137
GO:0071216	cellular response to biotic stimulus	GOBP	174	yes	-0.148336	0.862141	1.99e-05	0.000398	down	2950, 4057, 4792, 9516, 3383, 207, 7157, 7128, 2932, 4790, 10221, 6364, 6352, 1604, 54499, 5467, 7133, 1051, 19, 29108, 148022, 958, 558, 59307, 3055, 5142, 7097, 3656, 57088, 3394, 8106, 923, 1234, 7100, 7292, 7096, 6770, 10333, 948, 27063, 695, 26191, 3569, 4064, 1440, 7124, 1524, 941, 26228, 4360, 3592, 353376, 57379
GO:0030017	sarcomere	GOCC	187	yes	0.198509	1.21958	4.22e-05	0.000402	up	226, 3728, 7171, 7170, 375, 1674, 801, 58, 3998, 113146, 4703, 171024, 4620, 9531, 29766, 2318, 70, 114907, 27295, 88, 3611, 4619, 5058, 129446, 4625, 4660, 5525, 4632, 4633, 6717, 1756, 8048, 80206, 7136, 5142, 7134, 2275, 127294, 9499, 9456, 442721, 8736, 845, 27063, 6263, 23676, 22927, 6271, 6546, 79933, 57159, 4634, 7139, 26287, 91156, 55800, 7137
GO:0045123	cellular extravasation	GOBP	43	yes	-0.223273	0.799897	2.04e-05	0.000406	down	3383, 7412, 29, 3689, 50512, 101, 5293, 6404, 3695, 5734, 120425, 3676, 5294, 7124, 54210, 729230
GO:0015682	ferric iron transport	GOBP	38	yes	0.357946	1.43039	2.07e-05	0.000408	up	523, 533, 9550, 9114, 51382, 51606, 4891, 79689, 7018, 245973, 525
GO:0072512	trivalent inorganic cation transport	GOBP	38	yes	0.357946	1.43039	2.07e-05	0.000408	up	523, 533, 9550, 9114, 51382, 51606, 4891, 79689, 7018, 245973, 525
GO:0006119	oxidative phosphorylation	GOBP	138	yes	0.263177	1.30106	2.07e-05	0.000408	up	54205, 4710, 10105, 4711, 4719, 29796, 4204, 57017, 4702, 55967, 54949, 4731, 4718, 51103
GO:0006826	iron ion transport	GOBP	63	yes	0.316626	1.37249	2.09e-05	0.000408	up	523, 533, 9550, 9114, 51382, 51606, 4891, 81894, 79689, 7018, 3077, 6556, 245973, 286133, 525, 57348
GO:0002708	positive regulation of lymphocyte mediated immunity	GOBP	71	yes	-0.197472	0.820803	2.15e-05	0.000419	down	7186, 5817, 958, 54440, 51010, 3902, 118460, 50943, 7409, 7292, 114836, 695, 3569, 940, 3594, 4068, 51561, 23529, 7124, 2205, 56253, 2208, 30009, 4049, 10666, 259197, 3592, 117157, 6375
GO:0042773	ATP synthesis coupled electron transport	GOBP	123	yes	0.279788	1.32285	2.21e-05	0.000429	up	54205, 4710, 4711, 4719, 29796, 4204, 57017, 4702, 55967, 54949, 4731, 4718, 51103
GO:0042775	mitochondrial ATP synthesis coupled electron transport	GOBP	123	yes	0.279788	1.32285	2.21e-05	0.000429	up	54205, 4710, 4711, 4719, 29796, 4204, 57017, 4702, 55967, 54949, 4731, 4718, 51103
GO:0044391	ribosomal subunit	GOCC	181	yes	0.201205	1.22288	4.76e-05	0.000444	up	6152, 6165, 11224, 11222, 51021, 6182, 51081, 57129, 64960, 51116, 56945, 6183, 54948, 219927, 200916, 91574, 3396, 26589, 84769, 10240, 63899
GO:0009404	toxin metabolic process	GOBP	7	yes	-0.3376	0.713481	2.31e-05	0.000444	down	5066, 400, 1545, 6770, 54905
GO:0045577	regulation of B cell differentiation	GOBP	23	yes	-0.256187	0.773997	2.33e-05	0.000448	down	4323, 678, 3398, 3635, 3071, 286410, 939, 150372, 7535, 695, 22806
GO:0014841	skeletal muscle satellite cell proliferation	GOBP	7	yes	-0.337444	0.713592	2.35e-05	0.00045	down	8837, 5467, 84466, 2247
GO:0000041	transition metal ion transport	GOBP	126	yes	0.257783	1.29406	2.5e-05	0.000472	up	2288, 523, 533, 9550, 9114, 1317, 51382, 51606, 4891, 81894, 10063, 79689, 57181, 7018, 9914, 6947, 3077, 29986, 6556, 245973, 286133, 525, 57348
GO:0002292	T cell differentiation involved in immune response	GOBP	56	yes	-0.208745	0.811602	2.53e-05	0.000476	down	301, 3965, 5971, 6363, 3718, 4602, 3662, 1880, 5734, 50943, 7292, 114836, 10538, 3569, 3594, 8809, 51561, 4063, 8320, 941, 8995
GO:0002260	lymphocyte homeostasis	GOBP	58	yes	-0.202176	0.816951	2.54e-05	0.000477	down	972, 3091, 207, 7128, 11151, 3965, 5585, 10018, 5366, 596, 3718, 355, 8915, 3071, 8456, 27040, 50943, 10673, 3559, 84524, 27240, 608, 8740, 23495, 115650, 84636, 778
GO:0005924	cell-substrate adherens junction	GOCC	388	yes	0.130108	1.13895	5.32e-05	0.000486	up	71, 3728, 301, 7534, 6382, 5034, 928, 1072, 7171, 960, 3655, 4323, 375, 999, 2923, 3159, 7529, 5500, 824, 7532, 2783, 3685, 2017, 3383, 3936, 2697, 10787, 171024, 5479, 23603, 6278, 214, 11135, 5756, 5747, 6730, 6386, 5829, 2318, 70, 309, 7205, 88, 3611, 5880, 5058, 64759, 23332, 9564, 5788, 5604, 54751, 4892, 81873, 2768, 60312, 8650, 23092, 3660, 90102, 8394, 2037, 64326, 5817, 5329, 8829, 6237…
GO:0022624	proteasome accessory complex	GOCC	48	yes	0.379868	1.46209	5.33e-05	0.000486	up	5708, 5700, 10197, 5707, 7979, 5713, 5717, 5718, 5716
GO:1990182	exosomal secretion	GOBP	20	yes	0.423831	1.5278	2.64e-05	0.000494	up	6382, 7879, 8766, 9146, 6386, 9525, 27243, 27183, 8027
GO:0015079	potassium ion transmembrane transporter activity	GOMF	151	yes	-0.177522	0.837342	1.73e-05	0.000504	down	483, 10723, 9990, 6560, 8514, 9424, 3772, 3749, 8645, 486, 79041, 84679, 30818, 3750, 3786, 3762, 23416, 54207, 3779, 389015, 3768, 3738, 9312, 1258, 3766, 3743, 3737, 9196, 56659, 3756, 30819, 1259, 343450, 123041, 10021, 25769, 54714
GO:0050857	positive regulation of antigen receptor-mediated signaling pathway	GOBP	14	yes	-0.287127	0.750416	2.73e-05	0.000509	down	5788, 3932, 57181, 150372, 1236, 5579, 50852, 26228
GO:0001818	negative regulation of cytokine production	GOBP	212	yes	-0.1388	0.870402	2.75e-05	0.000511	down	301, 2950, 10457, 4057, 9314, 7850, 8887, 5045, 53833, 3620, 7128, 4790, 3965, 307, 5971, 7072, 10204, 28951, 54476, 29108, 3635, 3718, 558, 59307, 3071, 9308, 408, 27342, 11213, 28514, 10385, 2150, 3902, 90865, 10365, 201633, 8832, 5734, 50943, 7292, 3604, 10225, 23208, 197358, 11326, 695, 26191, 3569, 79589, 3077, 51561, 6556, 2627, 4157, 6504, 3625, 7124, 54106, 2841, 1139, 3592, 6375, 51738
GO:0072372	primary cilium	GOCC	190	yes	-0.141634	0.867939	5.83e-05	0.000525	down	8655, 5108, 5310, 84747, 4644, 403, 51684, 51098, 23288, 84662, 196383, 26160, 79867, 9742, 200894, 23116, 79809, 57728, 755, 10461, 11020, 5727, 55112, 23432, 57539, 54806, 79600, 27241, 91147, 5158, 80776, 84140, 8100, 23035, 79583, 23329, 22941, 79989, 4867, 1258, 8787, 1812, 10083, 4117, 1259, 778, 57101, 54714
GO:0009116	nucleoside metabolic process	GOBP	481	yes	0.144306	1.15524	2.93e-05	0.000543	up	2597, 226, 7167, 5230, 6774, 5223, 518, 54205, 3091, 2987, 8833, 2773, 3099, 9414, 4710, 523, 10476, 5214, 9611, 262, 5209, 1739, 10105, 4711, 9061, 9551, 353, 93974, 1635, 4860, 4625, 4719, 7372, 29796, 4204, 2026, 205, 51816, 4507, 11164, 57017, 4702, 51071, 3251, 55967, 7298, 272, 7378, 6820, 260425, 10380, 60489, 9060, 54949, 4731, 4718, 5208, 6783, 55, 4907, 200316, 5210, 1497, 51103, 122622…
GO:0008037	cell recognition	GOBP	111	yes	-0.166894	0.84629	3.07e-05	0.000565	down	100423062, 7203, 3911, 6950, 57142, 10694, 81607, 6091, 1739, 2049, 1954, 6363, 5817, 8829, 30815, 2525, 9037, 81704, 54742, 23210, 1794, 5551, 57228, 4897, 923, 26047, 4345, 201633, 1236, 8851, 921, 84466, 1047, 84329, 81035, 948, 6092, 2047, 6900, 56253, 152330, 1268, 5016, 10666, 259197, 79820, 55079
GO:0036258	multivesicular body assembly	GOBP	30	yes	0.372396	1.45121	3.08e-05	0.000566	up	8766, 5119, 9146, 57132, 9525, 27243, 27183, 51510, 51534, 91782, 84313, 25978, 8027
GO:0006413	translational initiation	GOBP	253	yes	0.193952	1.21404	3.1e-05	0.000567	up	1981, 6152, 6165, 11224, 7458, 8662, 1983, 8668, 9669, 10480, 1964, 22916, 83939, 6352, 1965, 4690, 8669, 1977, 1978, 54915, 6199, 8872, 4686, 1967, 9470, 5610, 4528, 10289, 8891, 400961, 123263, 7124
GO:0051188	cofactor biosynthetic process	GOBP	244	yes	0.203714	1.22595	3.12e-05	0.00057	up	6319, 9524, 8566, 2194, 10135, 47, 51629, 27430, 27249, 93974, 64834, 60481, 2181, 2180, 6576, 4860, 84532, 51144, 211, 51647, 79966, 4891, 57017, 80308, 55191, 57019, 27158, 55163, 1371, 8942, 84191, 1737, 8803, 25902, 5860, 55316, 7390, 4199, 32, 51805, 57546, 5805, 79071, 8034, 23590, 23498, 23475, 23305, 4143, 284486
GO:0042428	serotonin metabolic process	GOBP	7	yes	-0.334891	0.715416	3.14e-05	0.000571	down	2903, 491
hsa05330	Allograft rejection	KEGG	13	yes	-0.284743	0.752207	3.97e-05	0.000573	down	958, 355, 5551, 940, 7124, 356, 941, 959, 3592
hsa04630	Jak-STAT signaling pathway	KEGG	111	yes	-0.161543	0.85083	4.01e-05	0.000573	down	6774, 2885, 3459, 4609, 207, 3572, 53833, 3460, 7297, 9021, 3561, 5292, 8503, 5295, 6776, 1439, 3560, 3977, 3718, 5293, 3587, 3717, 10000, 8027, 3455, 3570, 8651, 50615, 3600, 8835, 58985, 3559, 5618, 3590, 3575, 3569, 3594, 5294, 51561, 6775, 29949, 23529, 1440, 3574, 1271, 116379, 3592, 50604
GO:0015026	coreceptor activity	GOMF	37	yes	-0.23442	0.79103	2.12e-05	0.000596	down	3685, 7852, 920, 8829, 925, 926, 92, 1234, 10267, 10663, 3676, 940, 941, 4919, 1237
GO:0016493	C-C chemokine receptor activity	GOMF	12	yes	-0.324768	0.722695	2.16e-05	0.000596	down	1234, 1236, 1235, 729230, 1233, 1237, 2826
GO:0008565	protein transporter activity	GOMF	105	yes	0.256196	1.29201	2.22e-05	0.000596	up	4170, 5901, 162, 3838, 3840, 7095, 3836, 9868, 1175, 23214, 10452, 51699, 10204, 5906, 91782, 401505, 100287932, 9670, 3839, 4891, 10440, 23480, 1174, 83548, 10267, 130340, 563, 64901, 23209, 402569
GO:0036257	multivesicular body organization	GOBP	31	yes	0.366623	1.44285	3.64e-05	0.000657	up	8766, 5119, 9146, 57132, 9525, 27243, 27183, 51510, 51534, 91782, 84313, 25978, 8027
GO:0042108	positive regulation of cytokine biosynthetic process	GOBP	59	yes	-0.205055	0.814602	3.68e-05	0.000662	down	3659, 6364, 920, 1536, 148022, 916, 8915, 4050, 6693, 3662, 7096, 10333, 2069, 940, 7124, 51284, 2205, 729230, 10148, 54106, 941, 115650
GO:0051443	positive regulation of ubiquitin-protein transferase activity	GOBP	97	yes	0.251198	1.28557	3.69e-05	0.000662	up	5708, 5700, 7332, 10197, 5707, 5686, 5713, 5717, 7334, 5347, 51529, 7324, 5718, 5716, 54165, 29882, 84259, 91947, 123879
GO:0030890	positive regulation of B cell proliferation	GOBP	33	yes	-0.234279	0.791141	3.78e-05	0.000675	down	972, 5788, 148022, 596, 958, 54440, 3071, 57181, 1880, 10673, 89780, 7293, 23529, 4773, 3574, 115650
GO:0022904	respiratory electron transport chain	GOBP	139	yes	0.255192	1.29071	3.79e-05	0.000675	up	54205, 4710, 4711, 2108, 4719, 29796, 4204, 57017, 4702, 55967, 54949, 4731, 4718, 51103
GO:0071222	cellular response to lipopolysaccharide	GOBP	144	yes	-0.153225	0.857937	3.82e-05	0.000679	down	2950, 4057, 4792, 9516, 3383, 207, 7128, 4790, 10221, 6364, 6352, 1604, 5467, 7133, 1051, 19, 29108, 148022, 958, 558, 59307, 3055, 5142, 7097, 3656, 57088, 3394, 8106, 923, 1234, 7100, 7292, 6770, 948, 27063, 26191, 3569, 4064, 1440, 7124, 1524, 941, 26228, 4360, 3592, 353376, 57379
GO:0046634	regulation of alpha-beta T cell activation	GOBP	73	yes	-0.193471	0.824094	3.94e-05	0.000699	down	301, 3659, 51043, 3965, 1604, 4860, 6363, 8764, 3718, 916, 54440, 3071, 9308, 4602, 64926, 3662, 50943, 7535, 7292, 11314, 3569, 940, 3594, 3077, 51561, 729230, 10148, 941, 3592, 6375, 8995
GO:0045766	positive regulation of angiogenesis	GOBP	114	yes	-0.165287	0.84765	3.96e-05	0.000701	down	694, 3091, 1893, 51752, 3689, 2152, 2113, 1536, 6237, 9037, 1545, 2321, 26051, 28514, 23411, 79924, 285, 5579, 2247, 2246, 727, 10411, 3373, 239, 2624, 5587, 3670, 2627, 79805, 146850, 1524, 3579, 1139, 7015, 2303, 7101, 57105
GO:0007224	smoothened signaling pathway	GOBP	121	yes	-0.165963	0.847078	4.18e-05	0.000734	down	5396, 5447, 2263, 916, 403, 5567, 2719, 51684, 51098, 84662, 26160, 55835, 79867, 9742, 200894, 2121, 4294, 79809, 57728, 755, 80199, 11020, 5727, 23432, 79600, 50937, 6474, 132884, 79583, 84976, 7480, 79989, 7545, 57540
GO:0070330	aromatase activity	GOMF	12	yes	-0.301983	0.73935	2.84e-05	0.000735	down	260293, 1545, 1580, 66002, 1573, 199974
GO:0019955	cytokine binding	GOMF	92	yes	-0.183869	0.832045	2.86e-05	0.000735	down	972, 5355, 3685, 3459, 7850, 7132, 3572, 53833, 7852, 3561, 4054, 1436, 8829, 8692, 3560, 3587, 3455, 3570, 3815, 1234, 1236, 3604, 10663, 3676, 948, 58985, 3559, 2833, 1235, 3594, 9244, 1271, 1524, 116379, 3579, 3592, 133396, 3577, 8200
GO:0000375	RNA splicing, via transesterification reactions	GOBP	459	yes	0.155114	1.16779	4.32e-05	0.000754	up	4904, 10492, 23450, 26528, 9775, 11171, 25804, 23028, 22916, 9939, 11168, 59286, 8683, 58517, 10189, 6732, 1207, 83443, 9785, 53981, 7072, 9128, 80004, 4686, 5437, 10150, 5432, 6627, 10286, 81608, 8896, 10199, 9129, 6733, 51645, 55760, 84081, 1478, 23210, 8106, 154007, 10179, 92797, 4857, 135295, 56853, 25862
GO:0046640	regulation of alpha-beta T cell proliferation	GOBP	19	yes	-0.266971	0.765695	4.41e-05	0.000766	down	3659, 3965, 1604, 8764, 916, 64926, 7535, 7292, 940, 51561, 729230, 10148, 941, 6375
GO:1903557	positive regulation of tumor necrosis factor superfamily cytokine production	GOBP	62	yes	-0.199456	0.819176	4.43e-05	0.000767	down	3065, 3965, 10564, 5295, 101, 6363, 1536, 29108, 148022, 914, 54440, 3717, 7097, 6693, 7096, 948, 64170, 51561, 3670, 729230, 54106
GO:1903708	positive regulation of hemopoiesis	GOBP	155	yes	-0.149684	0.86098	4.46e-05	0.000769	down	972, 301, 4323, 3091, 23028, 3965, 10221, 2113, 7071, 4860, 760, 4254, 101, 6363, 1435, 2309, 3398, 3635, 558, 54440, 3071, 9308, 286410, 4602, 92, 939, 50943, 7535, 7292, 3600, 2323, 3559, 3575, 140685, 695, 3569, 3594, 51561, 2624, 54997, 1440, 7124, 3574, 8808, 146850, 941, 8600, 3592, 50604, 3605
GO:0045580	regulation of T cell differentiation	GOBP	102	yes	-0.169114	0.844413	4.6e-05	0.000791	down	972, 301, 3659, 51043, 3965, 4860, 101, 6363, 441478, 3718, 914, 54440, 3071, 9308, 8456, 4602, 3662, 50943, 7535, 6935, 7292, 3600, 3559, 84524, 3575, 1493, 3569, 940, 3594, 51561, 3574, 8808, 146850, 941, 3592, 8995
GO:0005925	focal adhesion	GOCC	384	yes	0.126563	1.13492	8.95e-05	0.000797	up	71, 3728, 301, 7534, 6382, 5034, 928, 1072, 7171, 960, 3655, 4323, 375, 999, 2923, 3159, 7529, 5500, 824, 7532, 2783, 3685, 2017, 3383, 3936, 2697, 10787, 171024, 5479, 23603, 6278, 214, 11135, 5756, 5747, 6730, 6386, 5829, 2318, 70, 309, 7205, 88, 3611, 5880, 5058, 64759, 23332, 9564, 5788, 5604, 54751, 81873, 2768, 60312, 8650, 23092, 3660, 90102, 8394, 2037, 64326, 5817, 5329, 8829, 6237, 4739…
GO:0002294	CD4-positive, alpha-beta T cell differentiation involved in immune response	GOBP	50	yes	-0.210676	0.810037	4.64e-05	0.000797	down	301, 3965, 5971, 6363, 3718, 4602, 3662, 1880, 5734, 50943, 7292, 114836, 10538, 3569, 3594, 8809, 51561, 4063, 941, 8995
GO:0006813	potassium ion transport	GOBP	197	yes	-0.149024	0.861548	4.68e-05	0.000802	down	483, 10723, 1739, 9525, 88, 9990, 1027, 6844, 4905, 6560, 8514, 9424, 388591, 84561, 9472, 3772, 3749, 3792, 845, 8645, 486, 79041, 84679, 30818, 3750, 3786, 3762, 23416, 54207, 3779, 389015, 3768, 3738, 9312, 1258, 3766, 3743, 3737, 1812, 9196, 56659, 3756, 30819, 1259, 51083, 343450, 123041, 10021, 25769, 64805, 54714
GO:0008135	translation factor activity, RNA binding	GOMF	108	yes	0.267695	1.30695	3.31e-05	0.000835	up	1981, 7458, 8662, 1983, 8668, 9669, 10480, 1964, 83939, 1965, 85476, 8669, 1977, 29904, 1967, 9470, 4528, 1917, 80315, 10289, 8891, 91574, 3396
GO:0018958	phenol-containing compound metabolic process	GOBP	81	yes	-0.19192	0.825373	4.95e-05	0.000843	down	53905, 50506, 4128, 4929, 596, 3251, 4644, 90527, 1497, 2903, 3642, 405753, 10404, 6770, 7038, 4948, 4157, 1428, 51301, 491, 1812, 1621
GO:0001772	immunological synapse	GOCC	33	yes	-0.224753	0.798713	9.85e-05	0.000857	down	3383, 214, 1739, 11151, 963, 916, 8915, 5795, 951, 9306, 3932, 923, 3001, 27040, 7535, 399, 940, 388325
GO:0002755	MyD88-dependent toll-like receptor signaling pathway	GOBP	33	yes	-0.228282	0.7959	5.12e-05	0.000868	down	10318, 3659, 4214, 10454, 7097, 3656, 11213, 7100, 7096, 10333, 948, 695, 81793, 51284, 54106
GO:0055074	calcium ion homeostasis	GOBP	363	yes	-0.115627	0.890808	5.36e-05	0.000905	down	7009, 488, 801, 10134, 4283, 2697, 79572, 27020, 7852, 11151, 2769, 309, 9709, 6352, 55858, 9446, 5310, 1604, 54499, 5788, 920, 489, 6363, 596, 817, 57620, 6717, 94107, 958, 1756, 114897, 2053, 8048, 4644, 90550, 8805, 1043, 3717, 624, 5156, 55013, 10345, 55636, 1907, 3932, 160335, 793, 3708, 1193, 2150, 84239, 1234, 2099, 9001, 1236, 5734, 1903, 9472, 5579, 2247, 64072, 4828, 9914, 948, 3792, 84…
GO:0002637	regulation of immunoglobulin production	GOBP	45	yes	-0.213523	0.807734	5.47e-05	0.000921	down	7009, 7186, 5585, 9466, 51237, 958, 54440, 51010, 90865, 118460, 50943, 7292, 3569, 940, 7293, 23529, 200558, 7124, 30009, 959, 6375, 5950
GO:0032695	negative regulation of interleukin-12 production	GOBP	16	yes	-0.276938	0.758102	5.56e-05	0.000932	down	4790, 3718, 11213, 201633, 3604, 6504
GO:0030335	positive regulation of cell migration	GOBP	398	yes	-0.106978	0.898546	5.56e-05	0.000932	down	972, 3655, 4323, 3685, 80781, 3383, 4283, 8766, 6317, 3091, 207, 6278, 4193, 7803, 5747, 4318, 57111, 6386, 154810, 11151, 2152, 3965, 6364, 2113, 6352, 7205, 3611, 5880, 5058, 23332, 9564, 5788, 5420, 11235, 8613, 4254, 5295, 8650, 54910, 3265, 4233, 101, 6776, 6363, 1436, 1435, 29108, 8829, 596, 817, 8764, 1839, 57556, 9037, 29984, 83706, 5293, 2321, 22902, 3071, 3717, 5156, 650, 642273, 22800,…
GO:0030055	cell-substrate junction	GOCC	395	yes	0.123666	1.13164	0.000112	0.000967	up	71, 3728, 301, 7534, 6382, 5034, 928, 1072, 7171, 960, 3655, 4323, 375, 999, 2923, 3159, 7529, 5500, 824, 7532, 2783, 3685, 2017, 3383, 3936, 2697, 10787, 171024, 5479, 23603, 6278, 214, 11135, 5756, 5747, 6730, 6386, 5829, 2318, 70, 309, 7205, 88, 3611, 5880, 5058, 64759, 23332, 9564, 5788, 5604, 54751, 4892, 81873, 2768, 60312, 8650, 23092, 3660, 90102, 8394, 2037, 64326, 5817, 5329, 8829, 6237…
GO:0044264	cellular polysaccharide metabolic process	GOBP	111	yes	0.260552	1.29765	5.81e-05	0.000971	up	5500, 801, 207, 3572, 3038, 2932, 2131, 5836, 7360, 2997, 2132, 5257, 2992, 7262, 3667, 10331, 5255, 5507, 89801, 5167, 648791, 79369
GO:0043487	regulation of RNA stability	GOBP	152	yes	0.211008	1.23492	5.88e-05	0.000981	up	7534, 1981, 4904, 6418, 5708, 7529, 10492, 678, 207, 5700, 10197, 5707, 5686, 1736, 5713, 5717, 7133, 246175, 5718, 5716, 167227, 23016, 23404, 51010, 11340, 118460, 10642, 340152, 6556
GO:0003735	structural constituent of ribosome	GOMF	231	yes	0.18538	1.20368	3.98e-05	0.000986	up	6152, 6165, 11224, 292, 51629, 11222, 7351, 51021, 6182, 6576, 51073, 51081, 57129, 64960, 55052, 51116, 64928, 56945, 81894, 79751, 6183, 54948, 219927, 200916, 10884, 89874, 26589, 10240, 788, 8034
GO:0061436	establishment of skin barrier	GOBP	14	yes	0.437472	1.54879	6.02e-05	0.00100081	up	3868, 2810, 8626, 57822, 84283, 239, 2312, 59344
GO:0072507	divalent inorganic cation homeostasis	GOBP	398	yes	-0.111255	0.894711	6.08e-05	0.00100808	down	7009, 488, 801, 10134, 4283, 2697, 79572, 27020, 7852, 11151, 2769, 309, 9709, 6352, 4501, 55858, 9446, 5310, 1604, 54499, 5788, 920, 489, 6363, 147138, 596, 817, 57620, 6717, 94107, 958, 1756, 114897, 2053, 8048, 4644, 90550, 8805, 1043, 3717, 624, 5156, 55013, 10345, 55636, 1907, 3932, 160335, 793, 3708, 57181, 1193, 2150, 84239, 1234, 2099, 9001, 1236, 5734, 1903, 9472, 5579, 2247, 64072, 4828…
hsa04062	Chemokine signaling pathway	KEGG	162	yes	-0.139206	0.870049	7.63e-05	0.00102028	down	6774, 2783, 4792, 4283, 2885, 207, 2773, 5747, 6464, 5829, 2932, 7852, 4790, 6364, 6352, 2787, 5880, 5058, 7410, 9564, 5604, 8503, 5295, 3265, 5906, 6363, 2309, 2770, 57580, 112, 3718, 115, 5293, 3055, 5567, 3717, 10000, 408, 1794, 54331, 1234, 7454, 1236, 5330, 2786, 7409, 9844, 5579, 10663, 2268, 3702, 2833, 1235, 10235, 5294, 643, 653361, 729230, 6357, 1233, 1524, 2793, 3579, 26230, 399694, 12…
GO:0002224	toll-like receptor signaling pathway	GOBP	143	yes	-0.160474	0.85174	6.17e-05	0.0010203	down	1508, 330, 4057, 4792, 10318, 29979, 3659, 7128, 5641, 3689, 4214, 148022, 7867, 23180, 10454, 8915, 7097, 3656, 3684, 11213, 92747, 7301, 2150, 2099, 7100, 3662, 27293, 7096, 81035, 10333, 948, 695, 26191, 81793, 4064, 51284, 23098, 54106, 353376
GO:0001776	leukocyte homeostasis	GOBP	74	yes	-0.182548	0.833145	6.47e-05	0.00106451	down	972, 301, 3091, 207, 7128, 11151, 3965, 5585, 4254, 10018, 5366, 596, 3718, 355, 8915, 3071, 5142, 8456, 27040, 1880, 50943, 10673, 3559, 84524, 3569, 27240, 608, 8740, 3579, 23495, 2322, 115650, 84636, 778
GO:0002825	regulation of T-helper 1 type immune response	GOBP	23	yes	-0.263824	0.768109	6.57e-05	0.0010782	down	301, 9466, 6363, 3718, 90865, 7292, 3594, 51561, 6556, 729230, 941, 6375
GO:0006120	mitochondrial electron transport, NADH to ubiquinone	GOBP	82	yes	0.316898	1.37286	6.6e-05	0.00108101	up	4710, 4711, 4719, 57017, 4702, 55967, 4731, 4718, 51103
GO:0000377	RNA splicing, via transesterification reactions with bulged adenosine as nucleophile	GOBP	453	yes	0.152291	1.1645	6.73e-05	0.00109593	up	4904, 10492, 23450, 26528, 9775, 11171, 25804, 23028, 22916, 9939, 11168, 59286, 8683, 58517, 10189, 6732, 1207, 83443, 9785, 53981, 7072, 9128, 80004, 4686, 5437, 10150, 5432, 6627, 10286, 81608, 8896, 9129, 6733, 51645, 55760, 84081, 1478, 23210, 8106, 154007, 10179, 92797, 4857, 135295, 56853, 25862
GO:0000398	mRNA splicing, via spliceosome	GOBP	453	yes	0.152291	1.1645	6.73e-05	0.00109593	up	4904, 10492, 23450, 26528, 9775, 11171, 25804, 23028, 22916, 9939, 11168, 59286, 8683, 58517, 10189, 6732, 1207, 83443, 9785, 53981, 7072, 9128, 80004, 4686, 5437, 10150, 5432, 6627, 10286, 81608, 8896, 9129, 6733, 51645, 55760, 84081, 1478, 23210, 8106, 154007, 10179, 92797, 4857, 135295, 56853, 25862
GO:1904251	regulation of bile acid metabolic process	GOBP	7	yes	-0.327911	0.720427	6.76e-05	0.00109808	down	23411, 6770, 5629
GO:0050869	negative regulation of B cell activation	GOBP	27	yes	-0.238097	0.788126	6.96e-05	0.00112802	down	7128, 5585, 3398, 3635, 355, 472, 374403, 50943, 64092, 11314, 1493, 84174, 23495
GO:0002286	T cell activation involved in immune response	GOBP	75	yes	-0.185904	0.830354	7.11e-05	0.0011507	down	301, 3383, 3936, 3965, 5971, 6363, 3718, 3683, 4602, 2150, 3662, 1880, 5734, 50943, 54518, 7292, 114836, 10538, 3569, 3594, 8809, 51561, 4063, 6556, 8320, 941, 8995
GO:0002676	regulation of chronic inflammatory response	GOBP	9	yes	-0.309199	0.734035	7.24e-05	0.00116469	down	3620, 7128, 6352, 50943, 7124, 1524, 4049
GO:1901160	primary amino compound metabolic process	GOBP	9	yes	-0.309151	0.73407	7.28e-05	0.00116796	down	1119, 2903, 491
GO:0030049	muscle filament sliding	GOBP	40	yes	0.344025	1.41061	7.43e-05	0.00118679	up	7171, 7170, 1674, 58, 4703, 4620, 4604, 70, 88, 4606, 4625, 4632, 4633, 1756, 140465, 7136, 7134, 4634, 7139, 7137
GO:0033275	actin-myosin filament sliding	GOBP	41	yes	0.344025	1.41061	7.43e-05	0.00118679	up	7171, 7170, 1674, 58, 4703, 4620, 4604, 70, 88, 4606, 4625, 4632, 4633, 1756, 140465, 7136, 7134, 4634, 7139, 7137
hsa04080	Neuroactive ligand-receptor interaction	KEGG	139	yes	-0.144818	0.86518	9.44e-05	0.00118837	down	2568, 53637, 624, 2150, 3001, 2903, 5734, 1903, 2550, 9294, 2906, 5618, 135, 7068, 8698, 5646, 53829, 4157, 6752, 623, 5739, 27334, 5021, 2859, 3363, 1268, 2561, 1139, 9568, 10800, 4987, 5732, 1812, 8973, 2563, 147, 2914, 7434, 3357, 57105, 2567, 1137, 1269, 2831, 2917
GO:0016853	isomerase activity	GOMF	195	yes	0.215355	1.2403	4.9e-05	0.00119038	up	5034, 7167, 2923, 10728, 5223, 2288, 5479, 3157, 2289, 1736, 9536, 10105, 10682, 23071, 3422, 51477, 23508, 80142, 2582, 26995, 5730, 5373, 51645, 26035, 51303, 84650, 4351, 85313, 80324, 2954, 27079, 10170, 239, 246, 64081, 59344, 285755
GO:0044449	contractile fiber part	GOCC	214	yes	0.178293	1.19518	0.00014	0.00119399	up	226, 3728, 7171, 7170, 375, 1674, 801, 58, 3998, 113146, 4703, 171024, 4620, 9531, 3620, 29766, 2318, 70, 114907, 27295, 88, 3611, 4619, 5058, 129446, 4625, 4660, 5525, 4632, 4633, 6717, 1756, 140465, 8048, 80206, 7136, 5142, 7134, 2275, 127294, 9499, 9456, 442721, 8736, 845, 27063, 6263, 29895, 23676, 22927, 6271, 6546, 79933, 57159, 4634, 7139, 26287, 91156, 55800, 7137
GO:0022900	electron transport chain	GOBP	141	yes	0.245911	1.27879	7.52e-05	0.00119887	up	54205, 4710, 4711, 1534, 2108, 4719, 29796, 4204, 57017, 4702, 55967, 54949, 4731, 4718, 51103
GO:0002688	regulation of leukocyte chemotaxis	GOBP	91	yes	-0.173621	0.840616	7.58e-05	0.0012046	down	972, 4283, 6278, 3965, 6352, 5880, 79148, 6363, 1435, 11240, 3071, 3570, 1907, 63940, 2150, 1236, 4856, 57118, 727, 1235, 3569, 51561, 729230, 8740, 3579, 2841, 26228, 3592, 6375, 8995
GO:0005581	collagen trimer	GOCC	78	yes	-0.174401	0.83996	0.000145	0.00122105	down	80781, 1307, 169044, 114897, 1296, 1301, 1286, 81035, 81578, 91522, 129080, 1310, 1288, 1285, 1896, 8292, 1280, 389941, 729238, 1297, 340267, 653509
GO:0038128	ERBB2 signaling pathway	GOBP	38	yes	0.33208	1.39386	7.73e-05	0.00122188	up	3320, 11140, 2885, 207, 6464, 5295, 3265, 1839, 5753, 2069, 145957, 1950, 2066
GO:0032809	neuronal cell body membrane	GOCC	12	yes	-0.283152	0.753405	0.000154	0.00127381	down	1524, 9312, 3737
GO:0044298	cell body membrane	GOCC	12	yes	-0.283152	0.753405	0.000154	0.00127381	down	1524, 9312, 3737
GO:0042093	T-helper cell differentiation	GOBP	48	yes	-0.20906	0.811347	8.31e-05	0.0013107	down	301, 5971, 6363, 3718, 4602, 3662, 1880, 5734, 50943, 7292, 114836, 10538, 3569, 3594, 8809, 51561, 4063, 941, 8995
GO:0005154	epidermal growth factor receptor binding	GOMF	31	yes	0.357797	1.43018	6.09e-05	0.00135446	up	2885, 6464, 5359, 7410, 10188, 1839, 10551, 931, 2069, 1950, 2066, 374, 255324
GO:0014856	skeletal muscle cell proliferation	GOBP	8	yes	-0.315932	0.729109	8.63e-05	0.00135755	down	8837, 5467, 84466, 2247
GO:2000291	regulation of myoblast proliferation	GOBP	5	yes	0.534375	1.70638	8.66e-05	0.00135993	up	5467, 6665, 5308, 26287, 5081
GO:0043029	T cell homeostasis	GOBP	38	yes	-0.217386	0.804619	8.82e-05	0.00138062	down	207, 11151, 3965, 10018, 5366, 596, 3718, 355, 3071, 8456, 50943, 3559, 84524, 27240, 8740, 84636, 778
GO:0009913	epidermal cell differentiation	GOBP	172	yes	0.202014	1.22387	8.84e-05	0.00138062	up	3868, 2810, 301, 360, 8626, 5493, 6699, 6698, 9368, 6700, 3065, 2125, 9314, 6278, 3858, 7051, 6704, 6703, 3516, 84518, 5604, 84283, 8394, 8796, 204219, 55506, 8456, 8644, 28514, 1041, 5727, 6705, 6706, 8689, 79152, 2069, 5308, 58495, 84189, 4613, 2312, 1594, 7062, 5453, 6701, 3849, 491, 353133, 3890, 163778, 50604, 79955
GO:0002685	regulation of leukocyte migration	GOBP	142	yes	-0.149428	0.8612	8.9e-05	0.00138315	down	972, 301, 3383, 4283, 6278, 1893, 29, 3965, 6364, 6352, 5880, 79148, 4254, 101, 6363, 1435, 29108, 8764, 11240, 3071, 27342, 3570, 1907, 63940, 2150, 90865, 1236, 4856, 5734, 3676, 57118, 727, 11314, 2833, 1235, 3569, 51561, 623, 7124, 729230, 8740, 3579, 2841, 26228, 3592, 6375, 8995, 64805
GO:0097028	dendritic cell differentiation	GOBP	37	yes	-0.222103	0.800833	9.14e-05	0.00141489	down	10537, 4055, 3965, 3516, 5971, 6363, 558, 6688, 2150, 3662, 1236, 10202, 10538, 140685, 2322
GO:0002363	alpha-beta T cell lineage commitment	GOBP	13	yes	-0.287362	0.75024	9.25e-05	0.00142485	down	596, 3662, 50943, 114836, 10538, 3569, 3594, 51561, 4063, 8995
GO:0043369	CD4-positive or CD8-positive, alpha-beta T cell lineage commitment	GOBP	13	yes	-0.287362	0.75024	9.25e-05	0.00142485	down	596, 3662, 50943, 114836, 10538, 3569, 3594, 51561, 4063, 8995
GO:0048308	organelle inheritance	GOBP	14	yes	0.429554	1.53657	0.000101	0.00153225	up	7534, 2801, 10494, 5604, 11235, 7443, 1263
GO:0048313	Golgi inheritance	GOBP	14	yes	0.429554	1.53657	0.000101	0.00153225	up	7534, 2801, 10494, 5604, 11235, 7443, 1263
GO:0032633	interleukin-4 production	GOBP	33	yes	-0.228635	0.795619	0.000103	0.00156007	down	53833, 3965, 3516, 1051, 916, 54440, 9308, 90865, 3662, 50943, 7292, 3702, 79679, 940, 959
GO:0032102	negative regulation of response to external stimulus	GOBP	226	yes	-0.12643	0.881235	0.000104	0.00157379	down	2950, 4057, 2697, 9314, 5176, 7850, 7132, 6091, 5327, 53833, 7128, 29, 9021, 5055, 4790, 10221, 2113, 6696, 23332, 5467, 7133, 79148, 54910, 1855, 90102, 284207, 5329, 8829, 11240, 57556, 9037, 114897, 5610, 59307, 5627, 5156, 27342, 7301, 6693, 4907, 4856, 5734, 50943, 285, 2247, 27293, 11202, 3559, 727, 5345, 239, 6092, 89780, 79626, 223117, 3670, 5468, 1524, 116379, 9378, 2811, 57715, 2841, 26…
GO:0003954	NADH dehydrogenase activity	GOMF	50	yes	0.327232	1.38712	8.12e-05	0.00158785	up	56901, 4710, 4711, 4719, 4702, 55967, 4731, 4718
GO:0008137	NADH dehydrogenase (ubiquinone) activity	GOMF	44	yes	0.327232	1.38712	8.12e-05	0.00158785	up	56901, 4710, 4711, 4719, 4702, 55967, 4731, 4718
GO:0050136	NADH dehydrogenase (quinone) activity	GOMF	44	yes	0.327232	1.38712	8.12e-05	0.00158785	up	56901, 4710, 4711, 4719, 4702, 55967, 4731, 4718
GO:0004715	non-membrane spanning protein tyrosine kinase activity	GOMF	49	yes	-0.212073	0.808906	8.26e-05	0.00158785	down	5747, 7297, 10188, 3718, 5610, 91461, 3055, 3717, 2534, 5753, 3932, 7535, 2268, 3702, 695, 640, 7294
GO:0005251	delayed rectifier potassium channel activity	GOMF	20	yes	-0.265808	0.766586	8.45e-05	0.00158785	down	3749, 3786, 3738, 9312, 3743, 3737, 3756
GO:0033561	regulation of water loss via skin	GOBP	16	yes	0.41521	1.51469	0.000108	0.00162225	up	3868, 2810, 8626, 57822, 84283, 239, 2312, 59344
hsa00100	Steroid biosynthesis	KEGG	16	yes	0.494203	1.63919	0.000138	0.0016401	up	1718, 2222, 10682, 6307, 1717, 1595, 1056, 1594
GO:0005249	voltage-gated potassium channel activity	GOMF	79	yes	-0.202555	0.816642	9.02e-05	0.00164571	down	8514, 9424, 3772, 3749, 8645, 3750, 3786, 3762, 23416, 3768, 3738, 9312, 1258, 3766, 3743, 3737, 9196, 3756, 30819, 1259, 343450, 10021, 54714
GO:0072163	mesonephric epithelium development	GOBP	94	yes	-0.169088	0.844435	0.00011	0.00164609	down	4070, 6382, 3911, 4609, 1739, 5310, 3611, 4089, 2263, 4086, 596, 2719, 650, 4092, 793, 384, 51804, 5727, 2247, 2246, 30812, 6092, 5979, 9244, 168667, 4091, 2138, 6492, 2303, 3207, 7475
GO:0072164	mesonephric tubule development	GOBP	94	yes	-0.169088	0.844435	0.00011	0.00164609	down	4070, 6382, 3911, 4609, 1739, 5310, 3611, 4089, 2263, 4086, 596, 2719, 650, 4092, 793, 384, 51804, 5727, 2247, 2246, 30812, 6092, 5979, 9244, 168667, 4091, 2138, 6492, 2303, 3207, 7475
GO:0071868	cellular response to monoamine stimulus	GOBP	27	yes	-0.236661	0.789259	0.000111	0.00165745	down	112, 5142, 54331, 6770, 1812
GO:0071870	cellular response to catecholamine stimulus	GOBP	27	yes	-0.236661	0.789259	0.000111	0.00165745	down	112, 5142, 54331, 6770, 1812
GO:0015271	outward rectifier potassium channel activity	GOMF	12	yes	-0.311776	0.732145	9.41e-05	0.00169247	down	3750, 3738, 3737, 30819
GO:0002827	positive regulation of T-helper 1 type immune response	GOBP	16	yes	-0.285527	0.751618	0.000114	0.0016925	down	301, 9466, 6363, 3594, 51561, 6556, 729230, 941, 6375
GO:0007229	integrin-mediated signaling pathway	GOBP	90	yes	-0.169401	0.844171	0.000115	0.00170462	down	3655, 3911, 3685, 8751, 5747, 1307, 3689, 3611, 9564, 5341, 3683, 4739, 83706, 3055, 9510, 3684, 3682, 3695, 27040, 7409, 3676, 2268, 5587, 8516, 1015, 7294, 5354, 80739
GO:0045765	regulation of angiogenesis	GOBP	200	yes	-0.131563	0.876724	0.000116	0.00170734	down	694, 9314, 3091, 5176, 1893, 7128, 51752, 3689, 2152, 2113, 1942, 4804, 11235, 5764, 1536, 6237, 9037, 1545, 22846, 2321, 26051, 5797, 5168, 28514, 23411, 79924, 285, 5579, 2247, 2246, 727, 10411, 3373, 239, 3569, 2624, 5587, 3670, 2627, 79805, 729230, 1285, 356, 146850, 1524, 3579, 1139, 7015, 2303, 7101, 9723, 57105, 51738
GO:0001823	mesonephros development	GOBP	99	yes	-0.166892	0.846291	0.000116	0.00170734	down	4070, 6382, 3911, 4609, 1739, 5310, 3611, 4089, 2263, 4086, 596, 2719, 650, 4092, 793, 384, 51804, 5727, 2247, 2246, 30812, 6092, 5979, 9244, 168667, 4091, 2138, 6492, 2303, 3207, 7475
GO:0044275	cellular carbohydrate catabolic process	GOBP	43	yes	0.329078	1.38969	0.000116	0.00171146	up	7167, 5500, 801, 5223, 2820, 5836, 6652, 5257, 2992, 256356, 5255
GO:0005903	brush border	GOCC	71	yes	0.255924	1.29165	0.000216	0.00176712	up	3320, 1192, 9368, 10755, 5900, 4643, 5205, 830, 2768, 10999, 4891, 79901, 51181, 4628, 10568, 6584, 948, 4311, 22941, 6564, 10083
GO:0050855	regulation of B cell receptor signaling pathway	GOBP	14	yes	-0.284987	0.752024	0.000121	0.00177208	down	9404, 57181, 150372, 5579, 11314, 26191, 26228
GO:0002712	regulation of B cell mediated immunity	GOBP	39	yes	-0.214906	0.806617	0.000121	0.00177208	down	9466, 958, 51010, 118460, 50943, 7292, 695, 940, 23529, 200558, 7124, 2205, 2208, 30009, 4049, 10666, 6375
GO:0002889	regulation of immunoglobulin mediated immune response	GOBP	38	yes	-0.214906	0.806617	0.000121	0.00177208	down	9466, 958, 51010, 118460, 50943, 7292, 695, 940, 23529, 200558, 7124, 2205, 2208, 30009, 4049, 10666, 6375
GO:0050854	regulation of antigen receptor-mediated signaling pathway	GOBP	41	yes	-0.214703	0.806781	0.000124	0.00181383	down	5788, 8915, 5795, 56940, 3932, 9404, 57181, 150372, 1236, 5579, 11314, 26191, 53347, 50852, 26228, 778
GO:0031123	RNA 3'-end processing	GOBP	122	yes	0.225939	1.2535	0.000125	0.0018193	up	9775, 22916, 1736, 9939, 8683, 10189, 9785, 53981, 1025, 4686, 79670, 81608, 23016, 23404, 1478, 10898, 123169, 51010, 8106, 11340, 112479, 118460, 134353
GO:0051438	regulation of ubiquitin-protein transferase activity	GOBP	116	yes	0.222451	1.24913	0.000125	0.0018193	up	5708, 5700, 7332, 10197, 5707, 5686, 5713, 5717, 7334, 5347, 51529, 7324, 9529, 5718, 5716, 54165, 29882, 4092, 84259, 91947, 123879, 286151
GO:0001822	kidney development	GOBP	268	yes	-0.119573	0.887299	0.000129	0.00186063	down	4070, 6382, 3911, 9231, 5176, 4609, 1739, 4643, 5310, 3611, 4089, 57216, 5420, 7161, 25976, 760, 9688, 2263, 10018, 5017, 4086, 3398, 8829, 596, 8692, 50484, 9510, 403, 2719, 56913, 23210, 5156, 650, 84662, 4092, 28514, 793, 1286, 384, 51804, 10272, 4038, 168002, 285, 5727, 2247, 54806, 4311, 2246, 30812, 6092, 5125, 5979, 9244, 8854, 168667, 65266, 4091, 2045, 2138, 1285, 3579, 51301, 6492, 8516…
GO:0005747	mitochondrial respiratory chain complex I	GOCC	82	yes	0.302178	1.3528	0.000235	0.00186703	up	4710, 4711, 4719, 4702, 55967, 4731, 4718, 51103
GO:0030964	NADH dehydrogenase complex	GOCC	82	yes	0.302178	1.3528	0.000235	0.00186703	up	4710, 4711, 4719, 4702, 55967, 4731, 4718, 51103
GO:0045271	respiratory chain complex I	GOCC	82	yes	0.302178	1.3528	0.000235	0.00186703	up	4710, 4711, 4719, 4702, 55967, 4731, 4718, 51103
GO:0010863	positive regulation of phospholipase C activity	GOBP	31	yes	-0.224706	0.798751	0.000131	0.00189324	down	2769, 2321, 5156, 3815, 2099, 5330, 2247, 3702, 8698, 9290, 7294, 3357
GO:0051437	positive regulation of ubiquitin-protein ligase activity involved in regulation of mitotic cell cycle transition	GOBP	73	yes	0.258859	1.29545	0.000134	0.0019198	up	5708, 5700, 10197, 5707, 5686, 5713, 5717, 5347, 51529, 7324, 5718, 5716, 29882
GO:0072676	lymphocyte migration	GOBP	76	yes	-0.181283	0.8342	0.000134	0.0019198	down	6278, 1893, 6364, 6352, 101, 6363, 29108, 8764, 11240, 5293, 3695, 64005, 1236, 1880, 7535, 3676, 2833, 9420, 1235, 5979, 5294, 9048, 729230, 6357, 30009, 8740, 6375, 6846, 10344
GO:0030299	intestinal cholesterol absorption	GOBP	5	yes	0.526267	1.6926	0.000135	0.0019198	up	3949, 1645, 1056, 948
GO:0098856	intestinal lipid absorption	GOBP	5	yes	0.526267	1.6926	0.000135	0.0019198	up	3949, 1645, 1056, 948
GO:0006457	protein folding	GOBP	219	yes	0.173553	1.18952	0.000135	0.0019198	up	972, 3320, 2923, 10728, 7295, 7203, 2288, 2783, 3998, 908, 6950, 10694, 11140, 5479, 9531, 2773, 1460, 51726, 2289, 573, 10105, 3336, 23071, 54431, 25828, 10294, 9529, 23508, 5202, 55466, 2770, 51645, 10845, 80273, 27000, 131118, 51303, 85313, 26278, 1459, 54331, 26973, 25822, 27433, 1047, 84750, 2781, 8787, 3305, 285755, 2784
GO:0002719	negative regulation of cytokine production involved in immune response	GOBP	19	yes	-0.257678	0.772844	0.000137	0.00194706	down	3718, 11213, 50943, 10225, 3077, 6504, 7124, 6375
GO:0002178	palmitoyltransferase complex	GOCC	11	yes	0.43473	1.54455	0.000249	0.00195416	up	9517, 10558, 94103, 171546, 51114, 29095, 165679, 55304
GO:0034703	cation channel complex	GOCC	142	yes	-0.145537	0.864558	0.000258	0.00200544	down	801, 2017, 6337, 9709, 6844, 817, 6338, 90550, 5142, 8514, 91404, 55013, 10345, 9424, 26047, 6340, 9472, 782, 3749, 845, 6263, 8506, 30818, 3750, 27092, 3786, 3762, 6616, 6900, 3779, 3738, 9312, 6335, 1258, 3359, 3743, 3737, 1740, 55800, 3756, 30819, 343450, 778, 8913, 79820
GO:1903541	regulation of exosomal secretion	GOBP	16	yes	0.417326	1.5179	0.000142	0.00200972	up	6382, 7879, 9146, 6386, 9525, 27243, 27183, 8027
GO:1903543	positive regulation of exosomal secretion	GOBP	16	yes	0.417326	1.5179	0.000142	0.00200972	up	6382, 7879, 9146, 6386, 9525, 27243, 27183, 8027
GO:0050922	negative regulation of chemotaxis	GOBP	47	yes	-0.202286	0.816861	0.000142	0.00200972	down	2950, 6091, 79148, 54910, 8829, 11240, 57556, 9037, 4856, 285, 727, 6092, 89780, 223117, 57715, 2841, 26228, 9723
GO:0005178	integrin binding	GOMF	109	yes	-0.163418	0.849236	0.000114	0.00201652	down	5034, 928, 10457, 3655, 4323, 3911, 3383, 8751, 7412, 7450, 5829, 1307, 88, 3611, 8613, 83706, 3385, 7106, 4856, 120425, 1903, 3386, 9294, 2246, 53616, 11082, 7087, 3384, 1285, 2208, 10666, 1015
GO:0005681	spliceosomal complex	GOCC	205	yes	0.176035	1.19248	0.000263	0.00202556	up	4904, 10492, 23450, 10625, 9775, 25804, 9939, 58517, 10189, 5546, 83443, 9785, 9128, 6627, 10286, 8896, 9129, 51645, 55760, 154007, 92797
hsa04650	Natural killer cell mediated cytotoxicity	KEGG	102	yes	-0.154876	0.856521	0.00018	0.0020305	down	3383, 2885, 3459, 3460, 6464, 8795, 3689, 5880, 5058, 7410, 5604, 369, 8503, 5295, 3265, 3683, 355, 5293, 2534, 3937, 3455, 5551, 3932, 962, 27040, 7409, 7535, 5579, 8793, 919, 80328, 135250, 63928, 5294, 4068, 3384, 4773, 7124, 353091, 356, 154064, 399694, 259197, 79465, 117157, 2215, 5582
GO:1904872	regulation of telomerase RNA localization to Cajal body	GOBP	15	yes	0.417035	1.51746	0.000145	0.00203285	up	7203, 908, 6950, 10694, 1736, 8607, 55651, 55505
GO:1904874	positive regulation of telomerase RNA localization to Cajal body	GOBP	15	yes	0.417035	1.51746	0.000145	0.00203285	up	7203, 908, 6950, 10694, 1736, 8607, 55651, 55505
GO:0032651	regulation of interleukin-1 beta production	GOBP	43	yes	-0.2075	0.812613	0.000145	0.00203285	down	2950, 3428, 7128, 3965, 79792, 6363, 29108, 22861, 3717, 22900, 1236, 1903, 3670, 260434, 1139, 51738
GO:1903008	organelle disassembly	GOBP	112	yes	0.227526	1.25549	0.000148	0.00206227	up	8878, 2017, 11140, 3091, 3099, 86, 2011, 2801, 8607, 93974, 26100, 64422, 55486, 3831, 4528, 664, 92399, 7443, 22863, 1459, 1263, 115201, 285973
GO:1904018	positive regulation of vasculature development	GOBP	131	yes	-0.150459	0.860313	0.000148	0.00206841	down	694, 3091, 1893, 51752, 3689, 2152, 2113, 5906, 1536, 6237, 9037, 1545, 2321, 26051, 28514, 23411, 3815, 79924, 285, 5579, 2247, 2246, 727, 10411, 3373, 239, 2624, 5587, 3670, 2627, 79805, 146850, 1524, 3579, 1139, 7015, 2303, 7101, 57105
GO:0043122	regulation of I-kappaB kinase/NF-kappaB signaling	GOBP	245	yes	-0.119596	0.887279	0.000155	0.00215749	down	2950, 8878, 5052, 330, 4057, 10537, 4792, 389, 10318, 9516, 2697, 10342, 7132, 8837, 4055, 1893, 7128, 8795, 81603, 3965, 56892, 7205, 7334, 7186, 5187, 54602, 11040, 79971, 10769, 6363, 5716, 9020, 29108, 148022, 57449, 958, 8915, 2534, 7097, 23411, 22900, 23390, 55504, 2150, 2099, 939, 1236, 4856, 5579, 6285, 10333, 948, 197358, 399, 6283, 8809, 64170, 51561, 5587, 7124, 51284, 10913, 356, 1896…
GO:0050839	cell adhesion molecule binding	GOMF	449	yes	0.11959	1.12703	0.000124	0.00217353	up	2810, 226, 3728, 301, 7534, 6282, 5034, 928, 1981, 10457, 6152, 64855, 50848, 3655, 5052, 4323, 7458, 999, 5493, 1192, 3898, 7529, 5901, 3911, 9689, 2194, 2017, 829, 11187, 3383, 2125, 8428, 10755, 1983, 9588, 57142, 10694, 6520, 8751, 7412, 81607, 6455, 85377, 9531, 5861, 11135, 10226, 9414, 5756, 9208, 5214, 6712, 7450, 10611, 7082, 10652, 27020, 29766, 9748, 6386, 5829, 10848, 1307, 1739, 4646…
GO:0010518	positive regulation of phospholipase activity	GOBP	42	yes	-0.206768	0.813209	0.000159	0.00220155	down	2769, 6352, 400, 2263, 2321, 5156, 3815, 2099, 5330, 2247, 3702, 8698, 9290, 7294, 3357
GO:0032760	positive regulation of tumor necrosis factor production	GOBP	59	yes	-0.192139	0.825192	0.000159	0.00220155	down	3065, 3965, 10564, 5295, 6363, 1536, 29108, 148022, 914, 54440, 3717, 7097, 6693, 7096, 948, 64170, 51561, 3670, 729230, 54106
GO:0050708	regulation of protein secretion	GOBP	340	yes	-0.106451	0.89902	0.000163	0.0022493	down	301, 7009, 292, 375, 2029, 3065, 27230, 2697, 3091, 7850, 415116, 5127, 3965, 7351, 6352, 307, 5066, 7186, 79792, 5467, 5906, 101, 79971, 6363, 1436, 29108, 22861, 8764, 8692, 6717, 958, 90550, 914, 3717, 408, 7097, 27342, 3667, 5208, 8651, 134957, 3708, 22900, 10385, 2150, 1946, 7100, 90865, 1236, 4856, 5734, 50943, 7292, 9066, 3604, 7096, 2268, 8447, 23208, 10333, 27063, 727, 10411, 9501, 79679…
GO:0005976	polysaccharide metabolic process	GOBP	126	yes	0.233992	1.26363	0.000164	0.0022519	up	5500, 801, 207, 3572, 3038, 2932, 2131, 4790, 5836, 7360, 2997, 2132, 5257, 2992, 7262, 3667, 10331, 5255, 5507, 89801, 5167, 648791, 1950, 79369
GO:0016073	snRNA metabolic process	GOBP	97	yes	0.249646	1.28357	0.000165	0.00225944	up	22916, 1736, 22936, 55651, 1025, 55505, 4686, 5437, 8812, 5432, 2958, 26512, 23016, 23404, 55726, 51010, 11340, 118460, 5452, 84524
GO:0044441	ciliary part	GOCC	311	yes	-0.111034	0.894909	0.000304	0.00231561	down	3320, 8878, 9368, 8655, 150696, 1212, 207, 5108, 6337, 5310, 10938, 10564, 25930, 121441, 84747, 4957, 117178, 85014, 129880, 5567, 51684, 55054, 22863, 51098, 26160, 582, 147700, 55835, 79867, 9742, 200894, 2121, 1672, 85302, 23116, 79809, 57728, 755, 11020, 5727, 55112, 23432, 57539, 54806, 79600, 27241, 5577, 114327, 91147, 5158, 55329, 80776, 132884, 1235, 84140, 8100, 23035, 79583, 25981, 23…
GO:0098781	ncRNA transcription	GOBP	103	yes	0.234493	1.26427	0.00017	0.00232953	up	4691, 2975, 9328, 22916, 22936, 2976, 1025, 4686, 5437, 8812, 5432, 2958, 112495, 55506, 26512, 55726, 51547, 440400, 5452, 84524, 10849
GO:0032103	positive regulation of response to external stimulus	GOBP	243	yes	-0.121407	0.885674	0.000171	0.00233282	down	972, 10318, 4283, 3949, 6278, 2167, 7132, 3572, 3620, 2152, 3965, 5603, 2113, 6352, 5880, 1954, 4233, 101, 6363, 1435, 8829, 8692, 9037, 3071, 3717, 3603, 7097, 6809, 3570, 1907, 63940, 923, 2150, 5650, 90865, 1236, 5734, 7292, 2247, 3600, 57118, 5345, 695, 6283, 25818, 1235, 3569, 940, 81793, 5294, 9048, 1594, 51561, 4064, 5587, 7124, 51284, 2205, 729230, 6357, 1233, 54106, 8740, 2867, 4049, 357…
GO:0060402	calcium ion transport into cytosol	GOBP	141	yes	-0.157367	0.85439	0.000172	0.00233989	down	801, 4283, 11151, 9446, 5788, 920, 6363, 596, 817, 6717, 1756, 4644, 10345, 55636, 3932, 3708, 1193, 1234, 9001, 1236, 9472, 2247, 845, 6263, 6546, 930, 5587, 623, 8989, 1812, 6375, 3357
GO:0070588	calcium ion transmembrane transport	GOBP	263	yes	-0.125691	0.881887	0.000175	0.0023681	down	488, 801, 3685, 4283, 29979, 11151, 9446, 5310, 54499, 5788, 489, 6363, 23258, 817, 27075, 57620, 6717, 1756, 80228, 4644, 90550, 5142, 55013, 10345, 55636, 3932, 3708, 1193, 6588, 1234, 9001, 1236, 2903, 9472, 51393, 782, 2247, 9914, 845, 6263, 6271, 6546, 930, 5294, 89780, 5587, 55503, 255231, 623, 27092, 6543, 8989, 54106, 491, 4987, 1812, 6375, 3357, 778, 123041, 9629, 8913, 25769, 64805, 2917
GO:0043174	nucleoside salvage	GOBP	21	yes	0.420717	1.52305	0.000177	0.00238284	up	353, 4507, 3251, 7378, 978
GO:0001657	ureteric bud development	GOBP	93	yes	-0.166217	0.846863	0.000178	0.00239081	down	4070, 6382, 3911, 4609, 1739, 3611, 4089, 2263, 4086, 596, 2719, 650, 4092, 793, 384, 51804, 5727, 2247, 2246, 30812, 6092, 5979, 9244, 168667, 4091, 2138, 6492, 2303, 3207, 7475
GO:1903556	negative regulation of tumor necrosis factor superfamily cytokine production	GOBP	41	yes	-0.211796	0.80913	0.000178	0.00239081	down	2950, 10457, 4057, 7128, 3965, 558, 11213, 50943, 23208, 197358, 26191, 4157, 6504, 2841, 1139, 51738
GO:0042274	ribosomal small subunit biogenesis	GOBP	74	yes	0.272536	1.31329	0.000179	0.00240006	up	51081, 55226, 84916, 10199, 51118, 88745, 10436, 27042, 705, 84946
GO:0071312	cellular response to alkaloid	GOBP	26	yes	-0.234823	0.790711	0.000184	0.00245748	down	3383, 4193, 4790, 5888, 6770, 845, 6263, 6546, 7124
GO:0045471	response to ethanol	GOBP	93	yes	-0.160578	0.851651	0.000185	0.0024695	down	2950, 6774, 3383, 7412, 2806, 7082, 70, 1728, 1978, 1536, 94241, 7298, 2534, 6688, 939, 2903, 1571, 6770, 4880, 761, 1440, 3779, 3359, 2796, 1268, 1139, 5950, 1621, 57578
GO:0014013	regulation of gliogenesis	GOBP	79	yes	-0.170443	0.843291	0.000187	0.00248053	down	6692, 3065, 3572, 7852, 23405, 7161, 5803, 5764, 1435, 3398, 650, 7097, 1880, 118738, 30812, 6663, 4613, 5324, 23529, 5468, 729230, 6900, 4049, 26228, 7015, 7101, 1745, 1746, 64805
GO:0042977	activation of JAK2 kinase activity	GOBP	8	yes	-0.308269	0.734718	0.000191	0.00252565	down	6352, 3717, 8651, 11314, 5618, 51561
GO:0060291	long-term synaptic potentiation	GOBP	44	yes	-0.203629	0.815765	0.000197	0.00259168	down	4915, 27020, 4204, 5764, 10769, 6844, 6809, 2903, 23373, 6285, 22941, 6543, 6616, 1524, 1812, 7101, 54413, 25769
GO:2001026	regulation of endothelial cell chemotaxis	GOBP	15	yes	-0.275233	0.759396	0.000198	0.00259534	down	4233, 9037, 2247, 2246, 5587
GO:0045165	cell fate commitment	GOBP	203	yes	-0.127308	0.880462	0.000198	0.00259953	down	4170, 8543, 9314, 5396, 3516, 4089, 2139, 1051, 1848, 2263, 4086, 3398, 8829, 596, 4633, 8324, 7227, 7026, 123169, 8456, 51684, 650, 28514, 80326, 3662, 50943, 4855, 81029, 5727, 63950, 2247, 367, 50937, 54345, 114836, 10538, 30812, 22943, 3569, 3594, 89780, 51561, 2624, 30012, 4063, 3670, 2627, 7480, 3574, 4618, 5468, 7472, 2138, 8320, 9095, 10297, 5460, 2258, 7476, 64843, 5629, 2303, 5081, 5745…
GO:0005929	cilium	GOCC	498	yes	-0.0958163	0.908631	0.000344	0.00260317	down	301, 3320, 8878, 9368, 8655, 150696, 10694, 1212, 3091, 207, 5108, 6337, 5310, 10938, 10564, 6652, 25930, 51382, 121441, 84747, 4957, 117178, 85014, 152006, 112, 4644, 129880, 9654, 403, 81892, 5567, 51684, 55054, 22863, 51098, 23288, 84662, 196383, 26160, 582, 147700, 55835, 79867, 9742, 200894, 2121, 1672, 85302, 23116, 79809, 57728, 755, 10461, 11020, 5727, 55112, 23432, 57539, 54806, 79600, 2…
GO:0051764	actin crosslink formation	GOBP	12	yes	0.442266	1.55623	0.000202	0.00263684	up	5358, 3936, 1809, 55971, 80115, 7139
GO:0018108	peptidyl-tyrosine phosphorylation	GOBP	377	yes	-0.105	0.900324	0.000205	0.00267145	down	972, 3320, 960, 6774, 3065, 3383, 4915, 11140, 7132, 3572, 7157, 5747, 5912, 1523, 6464, 7297, 27020, 9021, 3689, 10006, 6352, 1942, 5604, 10188, 2049, 8613, 920, 4254, 30844, 9052, 2263, 5606, 4233, 6776, 1436, 8829, 8764, 8692, 1439, 1839, 253260, 958, 57826, 3718, 5610, 558, 916, 11064, 91461, 3055, 1198, 8805, 2321, 3717, 2534, 5156, 9149, 3570, 8651, 5753, 3932, 5168, 7301, 3815, 57396, 1946…
GO:0008033	tRNA processing	GOBP	154	yes	0.212993	1.23738	0.000205	0.00267145	up	3735, 64118, 55226, 24140, 26995, 79876, 54913, 10248, 1478, 10898, 51605, 80324, 115708, 79693, 4234, 9836, 27079, 123263, 10799
GO:0018212	peptidyl-tyrosine modification	GOBP	379	yes	-0.104651	0.900639	0.000208	0.002696	down	972, 3320, 960, 6774, 3065, 3383, 4915, 11140, 7132, 3572, 7157, 5747, 5912, 1523, 6464, 7297, 27020, 9021, 3689, 10006, 6352, 1942, 5604, 10188, 2049, 8613, 920, 4254, 30844, 9052, 2263, 5606, 4233, 6776, 1436, 8829, 8764, 8692, 1439, 1839, 253260, 958, 57826, 3718, 5610, 558, 916, 11064, 91461, 3055, 1198, 8805, 2321, 3717, 2534, 5156, 9149, 3570, 8651, 5753, 3932, 5168, 7301, 3815, 57396, 1946…
GO:0032733	positive regulation of interleukin-10 production	GOBP	28	yes	-0.229061	0.79528	0.000209	0.00271104	down	53833, 3965, 29108, 54440, 9308, 7097, 3662, 201633, 7292, 940, 51561, 54106, 959, 6375
GO:1900274	regulation of phospholipase C activity	GOBP	33	yes	-0.217095	0.804853	0.00021	0.00271272	down	2769, 2321, 5156, 3815, 2099, 5330, 2247, 3702, 8698, 9290, 7294, 3357
GO:0046641	positive regulation of alpha-beta T cell proliferation	GOBP	17	yes	-0.261131	0.77018	0.000214	0.00276133	down	3965, 1604, 916, 64926, 7535, 7292, 940, 51561, 729230, 10148, 941, 6375
GO:0042073	intraciliary transport	GOBP	31	yes	-0.231083	0.793674	0.000215	0.00276288	down	5108, 117178, 403, 9742, 79809, 57728, 11020, 57539, 79989, 166379, 199223
GO:0098840	protein transport along microtubule	GOBP	31	yes	-0.231083	0.793674	0.000215	0.00276288	down	5108, 117178, 403, 9742, 79809, 57728, 11020, 57539, 79989, 166379, 199223
GO:0002689	negative regulation of leukocyte chemotaxis	GOBP	11	yes	-0.291593	0.747073	0.000219	0.00279148	down	79148, 11240, 4856, 727, 2841, 26228
GO:0010257	NADH dehydrogenase complex assembly	GOBP	59	yes	0.28733	1.33286	0.000221	0.0027919	up	4710, 4711, 28976, 4719, 4702, 55967, 4731, 4718, 51103
GO:0032981	mitochondrial respiratory chain complex I assembly	GOBP	59	yes	0.28733	1.33286	0.000221	0.0027919	up	4710, 4711, 28976, 4719, 4702, 55967, 4731, 4718, 51103
GO:0097031	mitochondrial respiratory chain complex I biogenesis	GOBP	59	yes	0.28733	1.33286	0.000221	0.0027919	up	4710, 4711, 28976, 4719, 4702, 55967, 4731, 4718, 51103
GO:0072678	T cell migration	GOBP	41	yes	-0.209851	0.810705	0.000225	0.0028231	down	6278, 1893, 6364, 6352, 101, 29108, 8764, 5293, 3695, 64005, 1880, 7535, 3676, 2833, 1235, 5294, 729230, 8740, 6375
GO:0042455	ribonucleoside biosynthetic process	GOBP	144	yes	0.226723	1.25448	0.000226	0.00284064	up	226, 6774, 518, 2987, 8833, 10476, 262, 9061, 9551, 353, 7372, 205, 51816, 4507, 3251, 7378, 9060, 4907, 122622, 1723, 161823, 10861
GO:0036379	myofilament	GOCC	25	yes	0.354943	1.4261	0.000381	0.00285259	up	7171, 7170, 58, 29766, 7136, 7134, 442721, 8736, 7139, 7137
GO:0002312	B cell activation involved in immune response	GOBP	63	yes	-0.185201	0.830937	0.000229	0.00286223	down	9466, 958, 51010, 9025, 28514, 118460, 1880, 50943, 7292, 9452, 3981, 10538, 1235, 940, 4064, 23529, 200558, 30009, 959, 1015, 57379
GO:0007188	adenylate cyclase-modulating G-protein coupled receptor signaling pathway	GOBP	113	yes	-0.166017	0.847032	0.000235	0.00292615	down	9368, 2773, 5996, 2768, 2770, 5744, 112, 115, 5567, 54331, 79924, 5734, 1903, 2550, 2774, 135, 8698, 6752, 5739, 2781, 768239, 3363, 1268, 4987, 5732, 1812, 147, 2914, 3357, 27201, 64805, 2917
GO:2000106	regulation of leukocyte apoptotic process	GOBP	72	yes	-0.17447	0.839902	0.000237	0.00294945	down	972, 301, 6950, 3091, 7157, 3620, 3965, 6352, 1942, 4254, 101, 6363, 3718, 558, 355, 81704, 8915, 23411, 57181, 939, 1236, 10461, 155038, 84524, 695, 5133, 917, 3579
GO:0030016	myofibril	GOCC	220	yes	0.164239	1.1785	0.000401	0.00297141	up	71, 226, 3728, 7171, 7170, 375, 1674, 801, 58, 3998, 113146, 4703, 171024, 4620, 9531, 5756, 4604, 29766, 9659, 2318, 70, 114907, 27295, 88, 3611, 4619, 5058, 129446, 4625, 4660, 5525, 4632, 4633, 6717, 1756, 8048, 80206, 7136, 5142, 7134, 2275, 127294, 9499, 9456, 442721, 8736, 845, 27063, 6263, 23676, 22927, 6271, 6546, 79933, 57159, 4634, 7139, 26287, 91156, 57644, 55800, 7137
GO:0071867	response to monoamine	GOBP	31	yes	-0.223589	0.799644	0.00024	0.00297548	down	112, 5142, 54331, 6770, 1812
GO:0071869	response to catecholamine	GOBP	31	yes	-0.223589	0.799644	0.00024	0.00297548	down	112, 5142, 54331, 6770, 1812
GO:1904668	positive regulation of ubiquitin protein ligase activity	GOBP	79	yes	0.246802	1.27993	0.000243	0.00300119	up	5708, 5700, 10197, 5707, 5686, 5713, 5717, 5347, 51529, 7324, 5718, 5716, 29882
GO:0032673	regulation of interleukin-4 production	GOBP	27	yes	-0.232357	0.792663	0.000244	0.00300792	down	53833, 3965, 1051, 916, 54440, 9308, 90865, 3662, 50943, 7292, 940, 959
GO:0050921	positive regulation of chemotaxis	GOBP	121	yes	-0.152274	0.858753	0.000246	0.00302237	down	972, 4283, 6278, 2152, 3965, 6352, 5880, 1954, 4233, 6363, 1435, 8829, 9037, 3071, 3603, 6809, 3570, 1907, 63940, 2150, 1236, 2247, 57118, 1235, 3569, 9048, 51561, 5587, 729230, 1233, 8740, 3579, 4908, 3592, 6375, 8995
GO:0044304	main axon	GOCC	51	yes	-0.192779	0.824664	0.000411	0.00302309	down	1739, 7133, 4155, 817, 8514, 4897, 26047, 23136, 23114, 8506, 6092, 3786, 6900, 6506, 1139, 3737, 1740, 3756, 57471
GO:0032753	positive regulation of interleukin-4 production	GOBP	21	yes	-0.245851	0.782038	0.000248	0.00304174	down	53833, 3965, 1051, 916, 54440, 90865, 3662, 50943, 7292, 940, 959
GO:0043028	cysteine-type endopeptidase regulator activity involved in apoptotic process	GOMF	35	yes	-0.219933	0.802573	0.000177	0.00305133	down	330, 1027, 27018, 25816, 29108, 22861, 408, 22900, 939, 8740
GO:0001891	phagocytic cup	GOCC	18	yes	-0.247153	0.781021	0.000428	0.00311582	down	301, 3936, 11151, 9322, 56990, 64005, 84466, 51411, 23208, 7124
GO:0000774	adenyl-nucleotide exchange factor activity	GOMF	11	yes	0.450198	1.56862	0.000186	0.00313609	up	9531, 573, 5217, 9529, 80273
GO:0021554	optic nerve development	GOBP	9	yes	-0.296965	0.74307	0.000262	0.00320661	down	6152, 89797, 2047, 3737
GO:0006732	coenzyme metabolic process	GOBP	403	yes	0.143071	1.15381	0.000264	0.00322753	up	2597, 226, 7167, 5230, 6319, 6774, 7086, 5223, 3945, 9524, 8566, 2194, 4191, 10135, 3091, 3099, 47, 5214, 9611, 262, 5209, 27430, 27249, 64834, 60481, 2181, 2180, 6576, 4860, 84532, 2026, 51144, 79966, 57017, 51071, 80308, 55191, 51181, 4597, 7298, 55163, 8942, 1737, 8803, 25902, 5860, 8514, 5208, 84649, 10840, 4199, 5210, 32, 6573, 51805, 57546, 5805, 79071, 8034, 23590, 23498, 8875, 23475, 2330…
GO:0006874	cellular calcium ion homeostasis	GOBP	351	yes	-0.107899	0.897718	0.000266	0.00324087	down	7009, 488, 801, 10134, 4283, 2697, 79572, 27020, 7852, 11151, 2769, 309, 9709, 6352, 55858, 9446, 5310, 1604, 54499, 5788, 920, 489, 6363, 596, 817, 57620, 6717, 94107, 958, 1756, 114897, 2053, 8048, 4644, 90550, 1043, 3717, 624, 5156, 55013, 10345, 55636, 1907, 3932, 793, 3708, 1193, 2150, 84239, 1234, 2099, 9001, 1236, 5734, 1903, 9472, 5579, 2247, 64072, 4828, 9914, 948, 3792, 845, 6263, 79734…
GO:1901342	regulation of vasculature development	GOBP	223	yes	-0.121758	0.885363	0.000267	0.00325488	down	694, 9314, 3091, 5176, 1893, 7128, 51752, 3689, 2152, 2113, 1942, 4804, 11235, 5906, 5764, 1536, 6237, 9037, 1545, 22846, 2321, 26051, 5797, 5168, 28514, 23411, 3815, 79924, 285, 5579, 2247, 2246, 727, 10411, 3373, 239, 3569, 2624, 5587, 3670, 2627, 79805, 729230, 1285, 356, 146850, 1524, 3579, 1139, 7015, 2303, 7101, 9723, 57105, 51738
GO:0042255	ribosome assembly	GOBP	49	yes	0.290382	1.33694	0.00027	0.00328134	up	6152, 83939, 51081, 51119, 55052, 51388, 55794, 84769
GO:0033108	mitochondrial respiratory chain complex assembly	GOBP	76	yes	0.257363	1.29351	0.000272	0.00328802	up	4710, 4711, 28976, 4719, 29796, 4702, 55967, 10063, 4731, 4718, 51103
GO:0002863	positive regulation of inflammatory response to antigenic stimulus	GOBP	10	yes	-0.289443	0.74868	0.000273	0.00328802	down	1236, 695, 940, 7124, 2205, 4049, 1268
GO:2001028	positive regulation of endothelial cell chemotaxis	GOBP	11	yes	-0.29655	0.743378	0.000273	0.00328802	down	4233, 9037, 2247, 5587
GO:1990542	mitochondrial transmembrane transport	GOBP	76	yes	0.271416	1.31182	0.000273	0.00328802	up	3320, 518, 10476, 10452, 9551, 100287932, 10440, 80273, 90550, 55013, 57380, 5565, 32, 788
GO:0031145	anaphase-promoting complex-dependent catabolic process	GOBP	78	yes	0.246409	1.27942	0.000273	0.00328802	up	5708, 5700, 10197, 5707, 5686, 5713, 5717, 5347, 51529, 7324, 5718, 5716, 29882
GO:0097529	myeloid leukocyte migration	GOBP	155	yes	-0.142366	0.867304	0.000276	0.00331221	down	972, 301, 6278, 3689, 6364, 6352, 5880, 79148, 101, 79902, 6363, 1435, 57580, 5293, 2321, 3071, 5142, 3570, 1907, 7984, 3815, 1236, 4856, 5734, 120425, 7409, 57118, 727, 11314, 6283, 3569, 5294, 51561, 54210, 729230, 6357, 1524, 3579, 8600, 26228, 6375, 6846, 8995, 10344, 64805
GO:0034702	ion channel complex	GOCC	225	yes	-0.119312	0.887531	0.000461	0.00332475	down	1192, 801, 2017, 56262, 6337, 2568, 1739, 9709, 6844, 817, 6338, 90550, 5142, 8514, 91404, 55013, 10345, 134957, 9424, 1193, 26047, 2903, 6340, 9472, 782, 3749, 2906, 845, 6263, 8506, 126129, 94015, 30818, 22941, 3750, 27092, 3786, 3762, 6616, 54831, 6900, 3779, 3738, 9312, 6335, 1258, 3359, 2561, 1139, 3743, 3737, 1740, 55800, 8973, 2563, 3756, 30819, 343450, 778, 9629, 8913, 57101, 2567, 1137, …
GO:0043292	contractile fiber	GOCC	238	yes	0.157888	1.17104	0.000469	0.00333692	up	71, 226, 3728, 7171, 7170, 375, 1674, 801, 58, 3998, 113146, 2697, 4703, 171024, 4620, 9531, 5756, 4604, 3620, 29766, 9659, 2318, 70, 114907, 27295, 88, 3611, 4619, 5058, 129446, 4625, 4660, 5525, 4632, 4633, 6717, 1756, 140465, 8048, 80206, 7136, 5142, 7134, 2275, 127294, 8851, 9499, 9456, 442721, 8736, 845, 27063, 6263, 29895, 23676, 22927, 6271, 6546, 79933, 57159, 4634, 7139, 26287, 91156, 57…
GO:0030687	preribosome, large subunit precursor	GOCC	28	yes	0.331862	1.39356	0.000471	0.00333692	up	23481, 54881, 51388, 79080, 55759
GO:0002407	dendritic cell chemotaxis	GOBP	26	yes	-0.236115	0.78969	0.000282	0.003376	down	7852, 3965, 6352, 6363, 7984, 1234, 1236, 1880, 1235, 5294, 729230, 3579, 3592, 8995, 3577
GO:0032612	interleukin-1 production	GOBP	69	yes	-0.17871	0.836348	0.000288	0.00343699	down	301, 2950, 3428, 3065, 7850, 7128, 3965, 6364, 79792, 19, 6363, 29108, 22861, 3717, 22900, 2150, 1236, 1903, 10333, 948, 3670, 260434, 1139, 51738
GO:2000060	positive regulation of protein ubiquitination involved in ubiquitin-dependent protein catabolic process	GOBP	84	yes	0.234874	1.26475	0.000289	0.00343699	up	5708, 5700, 10197, 5747, 5707, 5686, 5713, 5717, 5347, 51529, 7324, 5718, 5716, 29882, 1950
GO:0036336	dendritic cell migration	GOBP	29	yes	-0.22846	0.795758	0.00029	0.00343925	down	7852, 3965, 6352, 6363, 81704, 7984, 1234, 1236, 1880, 1235, 5294, 729230, 3579, 3592, 8995, 3577
GO:0033692	cellular polysaccharide biosynthetic process	GOBP	74	yes	0.275761	1.31753	0.00029	0.00344142	up	5500, 207, 3038, 2932, 2131, 7360, 2997, 2132, 2992, 3667, 10331, 5507, 89801, 5167, 648791, 79369
GO:0000314	organellar small ribosomal subunit	GOCC	35	yes	0.342117	1.40792	0.000501	0.00349074	up	51021, 51081, 64960, 51116, 56945, 6183, 10240
GO:0005763	mitochondrial small ribosomal subunit	GOCC	35	yes	0.342117	1.40792	0.000501	0.00349074	up	51021, 51081, 64960, 51116, 56945, 6183, 10240
GO:0050701	interleukin-1 secretion	GOBP	40	yes	-0.210679	0.810034	0.000297	0.00350463	down	7850, 3965, 79792, 19, 6363, 29108, 22861, 22900, 2150, 1236, 10333, 948, 260434
GO:0070613	regulation of protein processing	GOBP	68	yes	-0.180051	0.835227	0.000304	0.00357085	down	330, 7850, 4193, 1604, 55061, 101, 5567, 5627, 51098, 3426, 143458, 727, 730, 85409, 5345, 733, 5199, 6900, 23409, 3818
GO:0002437	inflammatory response to antigenic stimulus	GOBP	33	yes	-0.215646	0.806021	0.000306	0.00358721	down	3383, 53833, 3516, 923, 6693, 1236, 3559, 695, 940, 7124, 2205, 4049, 3579, 1268, 10800, 133396
GO:0090670	RNA localization to Cajal body	GOBP	16	yes	0.398355	1.48937	0.000309	0.0036082	up	7203, 908, 6950, 10694, 1736, 8607, 55651, 55505
GO:0090671	telomerase RNA localization to Cajal body	GOBP	16	yes	0.398355	1.48937	0.000309	0.0036082	up	7203, 908, 6950, 10694, 1736, 8607, 55651, 55505
GO:0090672	telomerase RNA localization	GOBP	16	yes	0.398355	1.48937	0.000309	0.0036082	up	7203, 908, 6950, 10694, 1736, 8607, 55651, 55505
GO:0009156	ribonucleoside monophosphate biosynthetic process	GOBP	120	yes	0.248376	1.28194	0.000313	0.00364286	up	226, 6774, 518, 8833, 10476, 9551, 353, 7372, 205, 3251, 272, 7378, 122622, 1723
GO:0035004	phosphatidylinositol 3-kinase activity	GOMF	72	yes	-0.187053	0.8294	0.000219	0.00364663	down	2885, 8503, 4254, 5295, 2263, 1839, 472, 10818, 5293, 2534, 5156, 3667, 3932, 3815, 7409, 2247, 2246, 2069, 930, 940, 5294, 50852, 9365, 146850, 54106, 941, 5288, 145957, 1950, 2066
GO:0050688	regulation of defense response to virus	GOBP	80	yes	-0.168489	0.84494	0.000314	0.00364945	down	1173, 375, 330, 162, 7128, 340061, 1175, 920, 54476, 10053, 51606, 29108, 1174, 5610, 60489, 3055, 2534, 1794, 926, 3932, 6693, 200316, 9844, 919, 3600, 130340, 3559, 940, 3594, 51561, 117854
hsa05012	Parkinson's disease	KEGG	109	yes	0.216204	1.24136	0.00035	0.00374936	up	292, 7417, 518, 56901, 54205, 7332, 4710, 10476, 4711, 4719, 29796, 4702, 55967, 4731, 4718, 125965
GO:0005262	calcium channel activity	GOMF	129	yes	-0.169693	0.843924	0.000229	0.0037513	down	3685, 5310, 54499, 23258, 57620, 80228, 90550, 3708, 2903, 51393, 782, 6263, 55503, 255231, 27092, 8989, 778, 123041, 9629, 8913, 25769, 2917
GO:0060401	cytosolic calcium ion transport	GOBP	143	yes	-0.151331	0.859563	0.000337	0.00390048	down	488, 801, 4283, 11151, 9446, 5788, 920, 6363, 596, 817, 6717, 1756, 4644, 10345, 55636, 3932, 3708, 1193, 1234, 9001, 1236, 9472, 2247, 845, 6263, 6546, 930, 5587, 623, 8989, 1812, 6375, 3357
GO:0006446	regulation of translational initiation	GOBP	87	yes	0.24459	1.2771	0.000339	0.00390913	up	1981, 7458, 8662, 1983, 8668, 9669, 10480, 22916, 6352, 1965, 4690, 8669, 1978, 54915, 6199, 8872, 4686, 1967, 5610, 4528, 10289, 8891, 400961, 7124
GO:0030198	extracellular matrix organization	GOBP	336	yes	-0.103949	0.901271	0.000339	0.00390913	down	960, 50848, 3655, 4323, 999, 5268, 824, 3911, 6692, 3685, 80781, 3383, 3936, 8751, 7412, 5045, 3038, 4791, 5747, 4318, 7450, 4053, 9806, 1307, 3689, 2113, 4312, 4643, 6696, 3611, 23332, 51144, 101, 90102, 2331, 2006, 3683, 1296, 1545, 1301, 3385, 3684, 81577, 3682, 84290, 3695, 4314, 90993, 1286, 54507, 4327, 5650, 2247, 3676, 3386, 948, 5345, 8076, 146206, 1310, 124056, 7087, 89780, 3384, 1288, …
GO:0043062	extracellular structure organization	GOBP	337	yes	-0.103949	0.901271	0.000339	0.00390913	down	960, 50848, 3655, 4323, 999, 5268, 824, 3911, 6692, 3685, 80781, 3383, 3936, 8751, 7412, 5045, 3038, 4791, 5747, 4318, 7450, 4053, 9806, 1307, 3689, 2113, 4312, 4643, 6696, 3611, 23332, 51144, 101, 90102, 2331, 2006, 3683, 1296, 1545, 1301, 3385, 3684, 81577, 3682, 84290, 3695, 4314, 90993, 1286, 54507, 4327, 5650, 2247, 3676, 3386, 948, 5345, 8076, 146206, 1310, 124056, 7087, 89780, 3384, 1288, …
GO:1902495	transmembrane transporter complex	GOCC	256	yes	-0.112276	0.893797	0.000579	0.00399669	down	483, 1192, 801, 2017, 56262, 6337, 2568, 1739, 9709, 20, 29796, 6844, 817, 6338, 90550, 5142, 8514, 91404, 55013, 10345, 134957, 9424, 1193, 26047, 2903, 6340, 9472, 782, 3749, 2906, 845, 6263, 8506, 486, 126129, 94015, 30818, 22941, 3750, 27092, 3786, 3762, 6616, 54831, 6900, 3779, 3738, 9312, 6335, 1258, 3359, 2561, 1139, 3743, 3737, 1740, 55800, 8973, 2563, 3756, 30819, 343450, 778, 9629, 8913…
GO:0002534	cytokine production involved in inflammatory response	GOBP	21	yes	-0.239508	0.787015	0.000355	0.00406927	down	7850, 3620, 5187, 63940, 923, 10225, 3605
GO:0072006	nephron development	GOBP	133	yes	-0.144829	0.865171	0.000361	0.0041259	down	4070, 3911, 4609, 1739, 4643, 5310, 3611, 4089, 57216, 5420, 9688, 596, 2719, 5156, 650, 28514, 793, 1286, 51804, 285, 5727, 2247, 54806, 2246, 30812, 5979, 65266, 2138, 1285, 2303, 3207, 4868, 7475, 84623
GO:0001655	urogenital system development	GOBP	322	yes	-0.105471	0.8999	0.000365	0.00416521	down	301, 4070, 6382, 8626, 3655, 5268, 3911, 2288, 9231, 5176, 4609, 1739, 1396, 4643, 5310, 3611, 4089, 57216, 1027, 5420, 7161, 25976, 2049, 760, 9688, 2263, 10018, 5017, 4086, 3398, 8829, 596, 8692, 50484, 10818, 9510, 403, 2719, 56913, 23210, 5156, 650, 84662, 4092, 28514, 65057, 793, 1286, 384, 9742, 51804, 2099, 10272, 4038, 168002, 285, 5727, 2247, 54806, 367, 4311, 2246, 5618, 10481, 30812, 9…
GO:0005753	mitochondrial proton-transporting ATP synthase complex	GOCC	36	yes	0.365909	1.44182	0.000613	0.00419632	up	518, 10476, 10105, 9551, 93974, 9556
GO:0007622	rhythmic behavior	GOBP	29	yes	-0.223986	0.799326	0.000369	0.00420688	down	7157, 8863, 3398, 5730, 6770, 3569, 9099, 3737, 4987, 51738
GO:0032720	negative regulation of tumor necrosis factor production	GOBP	39	yes	-0.208697	0.811641	0.000371	0.00421862	down	2950, 10457, 7128, 3965, 558, 11213, 50943, 23208, 197358, 26191, 4157, 6504, 2841, 1139, 51738
GO:0006222	UMP biosynthetic process	GOBP	10	yes	0.451059	1.56997	0.000375	0.00423493	up	7372, 7378, 1723
GO:0009173	pyrimidine ribonucleoside monophosphate metabolic process	GOBP	10	yes	0.451059	1.56997	0.000375	0.00423493	up	7372, 7378, 1723
GO:0009174	pyrimidine ribonucleoside monophosphate biosynthetic process	GOBP	10	yes	0.451059	1.56997	0.000375	0.00423493	up	7372, 7378, 1723
GO:0046049	UMP metabolic process	GOBP	10	yes	0.451059	1.56997	0.000375	0.00423493	up	7372, 7378, 1723
GO:0001658	branching involved in ureteric bud morphogenesis	GOBP	51	yes	-0.191744	0.825518	0.000377	0.00424693	down	4070, 3911, 4609, 1739, 3611, 4089, 596, 2719, 650, 51804, 5727, 2247, 2246, 30812, 2138, 3207, 7475
GO:0018149	peptide cross-linking	GOBP	35	yes	0.319739	1.37677	0.000378	0.00424693	up	301, 6699, 6698, 6700, 2125, 7051, 9806, 6704, 6703, 6705, 6706, 6701, 353133, 163778
GO:0046635	positive regulation of alpha-beta T cell activation	GOBP	56	yes	-0.192925	0.824544	0.000378	0.00424693	down	301, 3965, 1604, 4860, 6363, 916, 54440, 3071, 9308, 4602, 64926, 50943, 7535, 7292, 3569, 940, 3594, 51561, 729230, 10148, 941, 3592, 6375
GO:0043027	cysteine-type endopeptidase inhibitor activity involved in apoptotic process	GOMF	19	yes	-0.255251	0.774722	0.000275	0.00429866	down	330, 25816, 408, 939, 8740
GO:0002705	positive regulation of leukocyte mediated immunity	GOBP	84	yes	-0.166093	0.846968	0.000386	0.00433139	down	7186, 5817, 958, 54440, 51010, 2150, 3902, 118460, 50943, 7409, 7535, 7292, 2268, 114836, 695, 3569, 940, 3594, 4068, 51561, 2624, 23529, 7124, 2205, 56253, 2208, 30009, 4049, 10666, 259197, 3592, 117157, 6375
GO:0048037	cofactor binding	GOMF	247	yes	0.150948	1.16294	0.000283	0.00436565	up	2597, 1718, 7086, 3945, 8566, 2194, 37, 2806, 47, 4942, 23028, 53905, 58472, 5447, 9517, 6342, 5836, 10558, 2108, 64118, 6652, 1717, 28976, 10994, 1488, 5625, 8540, 211, 84706, 1536, 80146, 27158, 7298, 55163, 220, 64780, 8942, 11112, 5860, 51700, 2762, 51547, 51167, 7390, 23411, 4199, 51741, 154807, 55349, 414149, 79896, 55258, 1723, 3291, 79777, 2731, 2571, 606495, 55304, 1428, 2875, 23409, 200…
GO:0005267	potassium channel activity	GOMF	114	yes	-0.175157	0.839325	0.000289	0.0044102	down	8514, 9424, 3772, 3749, 8645, 79041, 30818, 3750, 3786, 3762, 23416, 54207, 3779, 3768, 3738, 9312, 1258, 3766, 3743, 3737, 9196, 56659, 3756, 30819, 1259, 343450, 10021, 54714
hsa03040	Spliceosome	KEGG	123	yes	0.201281	1.22297	0.000433	0.00441193	up	23450, 23350, 9775, 25804, 22916, 9939, 8683, 58517, 10189, 83443, 9785, 9128, 4686, 6627, 10286, 8896, 9129, 151903, 51645, 3305
GO:0002687	positive regulation of leukocyte migration	GOBP	103	yes	-0.153601	0.857614	0.000399	0.00445552	down	972, 3383, 4283, 6278, 3965, 6364, 6352, 5880, 4254, 101, 6363, 1435, 29108, 8764, 3071, 3570, 1907, 63940, 2150, 1236, 3676, 57118, 1235, 3569, 51561, 623, 7124, 729230, 8740, 3579, 3592, 6375, 8995
GO:0016082	synaptic vesicle priming	GOBP	11	yes	-0.279254	0.756348	0.0004	0.00445719	down	8775, 6812, 93664, 6616, 112755
GO:0044708	single-organism behavior	GOBP	321	yes	-0.10211	0.90293	0.0004	0.00445719	down	1981, 4915, 2697, 3091, 5176, 7832, 6712, 25946, 9775, 27020, 353, 267, 8704, 1977, 1051, 8863, 5803, 4204, 5764, 10769, 4891, 3398, 4929, 596, 3251, 221935, 5730, 23259, 8061, 2534, 55636, 10752, 4045, 4835, 793, 26047, 9455, 3815, 1497, 2903, 23373, 9456, 6770, 11202, 2906, 6285, 7122, 5577, 10396, 8997, 53616, 84189, 22943, 3569, 91978, 80823, 22941, 6543, 2019, 85446, 6616, 6900, 54207, 7545,…
GO:0032692	negative regulation of interleukin-1 production	GOBP	15	yes	-0.259237	0.77164	0.000402	0.00446382	down	2950, 7850, 7128, 1139, 51738
GO:0006521	regulation of cellular amino acid metabolic process	GOBP	50	yes	0.279883	1.32298	0.00041	0.00454897	up	5708, 5700, 10197, 5707, 5686, 5713, 5717, 1728, 5718, 5716, 9056
GO:0060041	retina development in camera-type eye	GOBP	108	yes	-0.149293	0.861316	0.000411	0.00454897	down	6152, 4915, 3091, 5176, 86, 5764, 60436, 8829, 221935, 4628, 1545, 23210, 5156, 55636, 5797, 28514, 793, 9742, 112724, 10461, 56890, 54806, 50937, 5158, 30812, 6096, 286204, 9355, 5979, 43, 658, 4867, 56853, 5629, 7101, 5950, 25806
GO:0048512	circadian behavior	GOBP	28	yes	-0.225217	0.798343	0.000412	0.00455615	down	7157, 8863, 3398, 5730, 6770, 3569, 9099, 3737, 4987, 51738
GO:0045259	proton-transporting ATP synthase complex	GOCC	38	yes	0.359008	1.43191	0.000681	0.00462282	up	518, 10476, 10105, 9551, 93974, 9556
GO:0001525	angiogenesis	GOBP	460	yes	-0.0940937	0.910197	0.000424	0.0046829	down	4691, 6303, 4323, 688, 7127, 694, 3911, 3685, 80781, 9314, 8751, 3091, 5176, 6278, 6091, 9394, 1893, 5747, 7128, 79602, 6464, 51752, 3689, 2152, 2113, 284340, 3516, 93974, 9990, 1942, 7410, 116150, 4804, 2049, 11235, 2263, 5764, 101, 441478, 1536, 91010, 8829, 6237, 9037, 6733, 1296, 1545, 113026, 22846, 2321, 56913, 23210, 6688, 5156, 26051, 5797, 5333, 5168, 28514, 4897, 23411, 4327, 10267, 799…
GO:0002709	regulation of T cell mediated immunity	GOBP	48	yes	-0.195539	0.822391	0.000432	0.00475679	down	53833, 7186, 5788, 5817, 54440, 56940, 6693, 7454, 50943, 7292, 3575, 3569, 3594, 3077, 51561, 6504, 259197, 3592, 6375
GO:0009306	protein secretion	GOBP	427	yes	-0.0929335	0.911254	0.000436	0.00479031	down	301, 7009, 292, 375, 2029, 3065, 27230, 2697, 3091, 7850, 5861, 415116, 5127, 4053, 3965, 7351, 6352, 307, 3516, 5066, 7186, 79158, 79792, 5467, 4860, 5906, 101, 79971, 19, 6363, 1436, 29108, 22861, 5341, 8764, 8692, 6717, 958, 11119, 4644, 90550, 914, 3717, 3937, 408, 379, 7097, 27342, 3667, 5208, 51167, 8651, 134957, 3708, 22900, 10385, 2150, 1946, 7100, 90865, 1236, 4856, 5734, 50943, 7292, 90…
hsa05145	Toxoplasmosis	KEGG	108	yes	-0.144013	0.865876	0.000497	0.00483046	down	3655, 6774, 330, 3911, 4792, 3949, 54205, 3459, 207, 7132, 2773, 3460, 7297, 10105, 4790, 5603, 8503, 5295, 5606, 2770, 596, 958, 10454, 4261, 5293, 3587, 3717, 10000, 7097, 8651, 1234, 26279, 5294, 7124, 3305, 959, 3592
GO:0070838	divalent metal ion transport	GOBP	461	yes	-0.0989372	0.9058	0.000443	0.00485921	down	488, 801, 3685, 3383, 4283, 2697, 6520, 29979, 84061, 11151, 309, 6352, 55858, 9446, 5310, 54499, 5788, 29763, 920, 81614, 489, 6363, 23258, 4891, 596, 817, 81894, 27075, 57620, 6717, 1756, 80228, 4644, 90550, 2534, 5142, 55013, 10345, 57380, 55636, 348938, 3932, 3708, 57181, 1193, 6588, 7018, 1234, 9001, 10267, 8832, 1236, 2903, 9472, 5579, 51393, 782, 2247, 64072, 9456, 9914, 845, 6263, 6345, 6…
GO:0051090	regulation of sequence-specific DNA binding transcription factor activity	GOBP	349	yes	-0.0992668	0.905501	0.000446	0.00487933	down	3728, 4057, 4792, 3383, 11331, 9314, 207, 8887, 8837, 4791, 9208, 7128, 23028, 81603, 3689, 4790, 3965, 10221, 5292, 307, 7334, 7186, 9175, 8613, 101, 5716, 29108, 148022, 3398, 83696, 958, 8896, 7185, 5610, 2958, 10454, 1545, 8915, 59307, 3055, 8061, 3717, 51684, 408, 7097, 3656, 6045, 84662, 4092, 11213, 7984, 23411, 3815, 2099, 4294, 150372, 50943, 23373, 5727, 5579, 7292, 367, 57118, 197358, …
GO:1901659	glycosyl compound biosynthetic process	GOBP	165	yes	0.207346	1.23041	0.000453	0.00495029	up	226, 6774, 518, 2987, 8833, 10476, 262, 9061, 9551, 353, 1635, 7372, 205, 51816, 4507, 3251, 7298, 7378, 9060, 4907, 9836, 122622, 1723, 161823, 978, 10861
GO:1903672	positive regulation of sprouting angiogenesis	GOBP	14	yes	-0.267117	0.765583	0.000454	0.00495029	down	26051, 28514, 2247, 2246, 2303
GO:1903317	regulation of protein maturation	GOBP	69	yes	-0.175745	0.838832	0.000455	0.00495218	down	330, 7850, 4193, 1604, 55061, 101, 5567, 5627, 51098, 3426, 143458, 727, 730, 85409, 5345, 733, 5199, 6900, 23409, 3818
GO:0070972	protein localization to endoplasmic reticulum	GOBP	126	yes	0.197192	1.21798	0.000455	0.00495218	up	6152, 6165, 11224, 29927, 2923, 10134, 11014, 10945, 7095, 6730, 58477, 6729, 23480, 9409, 89866
GO:0072001	renal system development	GOBP	285	yes	-0.109299	0.896462	0.000461	0.00499829	down	4070, 6382, 8626, 3655, 3911, 9231, 5176, 4609, 1739, 4643, 5310, 3611, 4089, 57216, 5420, 7161, 25976, 760, 9688, 2263, 10018, 5017, 4086, 3398, 8829, 596, 8692, 50484, 9510, 403, 2719, 56913, 23210, 5156, 650, 84662, 4092, 28514, 793, 1286, 384, 9742, 51804, 10272, 4038, 168002, 285, 5727, 2247, 54806, 4311, 2246, 30812, 6092, 5125, 5979, 8549, 9244, 8854, 168667, 65266, 4091, 2045, 2138, 1285,…
GO:0045063	T-helper 1 cell differentiation	GOBP	15	yes	-0.257851	0.77271	0.000461	0.00499829	down	301, 5971, 6363, 3718, 7292, 8809, 941
GO:0032743	positive regulation of interleukin-2 production	GOBP	31	yes	-0.215629	0.806034	0.000464	0.00502105	down	301, 7186, 920, 916, 54440, 5142, 9308, 3662, 7292, 79679, 940, 729230, 941
GO:0006488	dolichol-linked oligosaccharide biosynthetic process	GOBP	23	yes	0.369097	1.44643	0.000473	0.00510534	up	10195, 116150, 4597, 57171, 85365, 22845, 79053
GO:0006490	oligosaccharide-lipid intermediate biosynthetic process	GOBP	25	yes	0.369097	1.44643	0.000473	0.00510534	up	10195, 116150, 4597, 57171, 85365, 22845, 79053
GO:0050727	regulation of inflammatory response	GOBP	260	yes	-0.109622	0.896173	0.000475	0.00510887	down	301, 2950, 330, 10318, 9314, 3949, 5176, 7850, 2167, 7132, 3572, 53833, 3620, 7128, 29, 9021, 4790, 5603, 2113, 6352, 1604, 5187, 55061, 5467, 7133, 11343, 101, 6542, 284207, 55773, 29108, 22861, 8692, 253260, 3055, 3717, 5627, 7097, 27342, 63940, 90527, 923, 7301, 6693, 3426, 4907, 2099, 90865, 1236, 4856, 5734, 50943, 405753, 7292, 3600, 27293, 3559, 727, 730, 2678, 695, 6283, 3569, 940, 733, 8…
GO:0006354	DNA-templated transcription, elongation	GOBP	129	yes	0.201432	1.22315	0.00049	0.00526684	up	22916, 22936, 10189, 1025, 6924, 4686, 5437, 8812, 55677, 5432, 84337, 2958, 123169, 9025, 404672, 6875, 6919, 10849
GO:0002643	regulation of tolerance induction	GOBP	14	yes	-0.266281	0.766224	0.000492	0.00528081	down	3620, 916, 11213, 50943, 3559, 5133
GO:0015934	large ribosomal subunit	GOCC	97	yes	0.213908	1.23851	0.0008	0.00534268	up	6152, 6165, 11224, 11222, 6182, 57129, 54948, 219927, 200916, 91574, 3396, 26589, 84769, 63899
GO:0097542	ciliary tip	GOCC	43	yes	-0.190412	0.826619	0.000808	0.00534569	down	8655, 51684, 51098, 26160, 9742, 79809, 57728, 11020, 55112, 57539, 8100, 79989, 4117
hsa05200	Pathways in cancer	KEGG	296	yes	-0.100797	0.904116	0.000576	0.00535557	down	3728, 2950, 3320, 3655, 7170, 999, 6774, 330, 3911, 4792, 3685, 3065, 54205, 10342, 2885, 3091, 4609, 207, 7157, 4193, 4791, 5747, 4318, 2932, 1163, 5900, 4790, 2113, 4312, 7186, 4089, 5880, 5467, 5899, 5604, 1027, 369, 8503, 1488, 4254, 5295, 1855, 3265, 2263, 4233, 6776, 1436, 2122, 9915, 596, 1021, 7185, 8324, 355, 5293, 83439, 10000, 6688, 5156, 51684, 650, 6932, 5888, 1286, 3815, 80326, 8102…
GO:0061756	leukocyte adhesion to vascular endothelial cell	GOBP	20	yes	-0.245577	0.782253	0.000504	0.00539615	down	9314, 7412, 2113, 50512, 3695, 3676, 7124
GO:0032663	regulation of interleukin-2 production	GOBP	50	yes	-0.187981	0.828631	0.000505	0.00539615	down	301, 53833, 7128, 7186, 920, 916, 54440, 5142, 9308, 3902, 3662, 50943, 7292, 11326, 79679, 940, 64170, 729230, 941, 6375
GO:0005536	glucose binding	GOMF	12	yes	0.429727	1.53684	0.000365	0.00543956	up	3099, 5836, 7360, 2997
GO:0046934	phosphatidylinositol-4,5-bisphosphate 3-kinase activity	GOMF	54	yes	-0.190932	0.826189	0.000373	0.00550476	down	2885, 4254, 5295, 2263, 1839, 10818, 5293, 2534, 5156, 3667, 3932, 3815, 7409, 2247, 2246, 2069, 930, 940, 5294, 50852, 9365, 146850, 941, 145957, 1950, 2066
GO:0071236	cellular response to antibiotic	GOBP	10	yes	-0.282805	0.753666	0.000518	0.00552955	down	4193, 1396, 1027, 6770
GO:0032945	negative regulation of mononuclear cell proliferation	GOBP	59	yes	-0.182225	0.833414	0.000521	0.00553861	down	53833, 3620, 1739, 3965, 1051, 5585, 8764, 3635, 472, 6693, 10385, 50943, 26279, 8654, 3559, 11314, 7940, 11326, 1493, 2796, 23495, 6375, 51083
GO:0050672	negative regulation of lymphocyte proliferation	GOBP	59	yes	-0.182225	0.833414	0.000521	0.00553861	down	53833, 3620, 1739, 3965, 1051, 5585, 8764, 3635, 472, 6693, 10385, 50943, 26279, 8654, 3559, 11314, 7940, 11326, 1493, 2796, 23495, 6375, 51083
hsa05016	Huntington's disease	KEGG	165	yes	0.169989	1.18529	0.000633	0.00564429	up	1173, 292, 7417, 3065, 518, 56901, 54205, 1212, 7157, 4710, 10476, 1175, 4711, 4719, 23186, 29796, 5437, 5432, 4702, 55967, 4731, 4718, 3708, 90993, 6875, 9001, 5330, 125965, 25981, 5468, 146754, 627, 55567
GO:0005244	voltage-gated ion channel activity	GOMF	178	yes	-0.145459	0.864626	0.000393	0.00567604	down	1192, 7417, 3685, 1536, 8514, 9424, 1193, 782, 3772, 3749, 84329, 8645, 30818, 3750, 27092, 3786, 3762, 23416, 54207, 3768, 3738, 9312, 6335, 1258, 3766, 3743, 3737, 55800, 9196, 56659, 3756, 30819, 1259, 343450, 778, 10021, 9629, 8913, 54714, 2917
GO:0022832	voltage-gated channel activity	GOMF	178	yes	-0.145459	0.864626	0.000393	0.00567604	down	1192, 7417, 3685, 1536, 8514, 9424, 1193, 782, 3772, 3749, 84329, 8645, 30818, 3750, 27092, 3786, 3762, 23416, 54207, 3768, 3738, 9312, 6335, 1258, 3766, 3743, 3737, 55800, 9196, 56659, 3756, 30819, 1259, 343450, 778, 10021, 9629, 8913, 54714, 2917
GO:0030176	integral component of endoplasmic reticulum membrane	GOCC	113	yes	0.200327	1.2218	0.000875	0.00574652	up	972, 29927, 6892, 10134, 9524, 57142, 6238, 1388, 550, 2131, 267, 54499, 64834, 60481, 1717, 91319, 8818, 10237, 57171, 22845, 166929, 9986, 84649, 219855, 79071, 10170, 7993, 26580
GO:0007610	behavior	GOBP	450	yes	-0.0885283	0.915277	0.000549	0.00582806	down	1981, 6774, 4915, 2697, 3091, 5176, 7832, 8932, 7157, 3620, 6712, 25946, 9775, 27020, 56172, 89797, 353, 267, 8704, 1977, 1051, 8863, 1855, 3265, 5803, 4204, 2744, 5764, 10769, 4891, 7182, 3398, 4929, 596, 3251, 221935, 5730, 23259, 220, 4644, 8061, 2534, 55636, 10752, 4045, 4835, 793, 26047, 9455, 3815, 1497, 79924, 2903, 23373, 64072, 9456, 6770, 11202, 54806, 2906, 6285, 7122, 5577, 23551, 103…
GO:0051439	regulation of ubiquitin-protein ligase activity involved in mitotic cell cycle	GOBP	72	yes	0.241274	1.27287	0.00055	0.00583529	up	5708, 5700, 10197, 5707, 5686, 5713, 5717, 5347, 51529, 7324, 5718, 5716, 29882, 286151
GO:0042734	presynaptic membrane	GOCC	49	yes	-0.181754	0.833807	0.000912	0.00594092	down	27020, 200933, 115207, 8061, 6809, 93664, 23390, 2903, 2550, 9066, 23208, 6857, 6616, 9378, 94030, 3737, 2914, 3756, 133396, 22999, 2917
GO:0034047	regulation of protein phosphatase type 2A activity	GOBP	23	yes	0.352251	1.42227	0.000562	0.00594233	up	6418, 2029, 10776, 5527, 5525, 5610, 5523, 5529
GO:0009163	nucleoside biosynthetic process	GOBP	163	yes	0.205934	1.22867	0.000564	0.00595626	up	226, 6774, 518, 2987, 8833, 10476, 262, 9061, 9551, 353, 1635, 7372, 205, 51816, 4507, 3251, 7298, 7378, 9060, 4907, 122622, 1723, 161823, 978, 10861
GO:0034637	cellular carbohydrate biosynthetic process	GOBP	86	yes	0.246253	1.27922	0.00057	0.00600017	up	5500, 207, 3038, 2932, 2131, 7360, 2997, 2132, 51477, 2992, 3667, 10331, 5507, 89801, 5167, 5105, 648791, 79369
GO:0045066	regulatory T cell differentiation	GOBP	16	yes	-0.255654	0.77441	0.000572	0.00601645	down	3659, 3965, 50943, 7292, 26279, 1493, 940, 2529
GO:0014015	positive regulation of gliogenesis	GOBP	38	yes	-0.199958	0.818765	0.000574	0.00601645	down	6692, 3065, 3572, 7852, 23405, 7161, 1435, 3398, 650, 7097, 118738, 30812, 6663, 5324, 23529, 5468, 729230, 4049
GO:0021884	forebrain neuron development	GOBP	24	yes	-0.226795	0.797084	0.000575	0.00601652	down	6091, 22809, 2263, 8829, 6092, 6900, 166614, 1812, 55079
GO:0098636	protein complex involved in cell adhesion	GOCC	48	yes	-0.202686	0.816535	0.000941	0.00607909	down	3655, 3685, 3689, 3683, 3684, 3682, 3695, 3676, 1493, 940, 941, 8516
GO:0014855	striated muscle cell proliferation	GOBP	45	yes	-0.192581	0.824828	0.000598	0.00623632	down	2697, 8837, 3516, 5467, 7161, 2263, 4086, 84466, 2247, 2627, 23414, 7472, 2303, 2066, 5950
GO:0000271	polysaccharide biosynthetic process	GOBP	86	yes	0.249081	1.28285	0.000628	0.00651362	up	5500, 207, 3038, 2932, 2131, 4790, 7360, 2997, 2132, 2992, 3667, 10331, 5507, 89801, 5167, 648791, 1950, 79369
GO:0030101	natural killer cell activation	GOBP	51	yes	-0.188329	0.828342	0.000629	0.00651362	down	3689, 11151, 148022, 3398, 558, 57823, 5293, 914, 7301, 50615, 10461, 3600, 2323, 80328, 114836, 26191, 8809, 51561, 6504, 79465, 3592
GO:0010960	magnesium ion homeostasis	GOBP	8	yes	-0.295421	0.744218	0.00064	0.00661027	down	3792, 7504
GO:0045579	positive regulation of B cell differentiation	GOBP	14	yes	-0.258811	0.771969	0.000641	0.00661201	down	4323, 3635, 3071, 286410, 939, 7535, 695
GO:0008601	protein phosphatase type 2A regulator activity	GOMF	23	yes	0.36739	1.44396	0.000467	0.0066695	up	6418, 2029, 10776, 5527, 5525, 5610, 5523, 5529
GO:0007623	circadian rhythm	GOBP	182	yes	-0.128894	0.879067	0.000651	0.00670692	down	5500, 3065, 4915, 10135, 7157, 22809, 9611, 2932, 5187, 7071, 5971, 8863, 4804, 3398, 5730, 7298, 687, 355, 23411, 79365, 8403, 23373, 6770, 6096, 3569, 9099, 5468, 3363, 3737, 5629, 4987, 9956, 6532, 5582, 51738
hsa05143	African trypanosomiasis	KEGG	31	yes	-0.204052	0.81542	0.0008	0.00684487	down	3383, 7412, 3620, 355, 2150, 5330, 5579, 3569, 7124, 356, 54106, 3592, 5582, 169355
GO:0072511	divalent inorganic cation transport	GOBP	463	yes	-0.0961017	0.908372	0.000667	0.00685753	down	488, 801, 3685, 3383, 4283, 2697, 6520, 29979, 84061, 11151, 309, 6352, 55858, 9446, 5310, 54499, 5788, 29763, 920, 81614, 489, 6363, 23258, 4891, 596, 817, 81894, 27075, 57620, 6717, 1756, 80228, 4644, 90550, 2534, 5142, 55013, 10345, 57380, 55636, 348938, 3932, 3708, 57181, 1193, 6588, 7018, 1234, 9001, 10267, 8832, 1236, 2903, 9472, 5579, 51393, 782, 2247, 64072, 9456, 9914, 6947, 845, 6263, 6…
GO:0016048	detection of temperature stimulus	GOBP	10	yes	-0.280005	0.75578	0.00067	0.00687683	down	2047, 644168
GO:0071346	cellular response to interferon-gamma	GOBP	110	yes	-0.145644	0.864465	0.000683	0.00698607	down	2597, 960, 10492, 3383, 163351, 4502, 11140, 7412, 3659, 3459, 3460, 9021, 81603, 3965, 6364, 6352, 4938, 3660, 6363, 817, 4261, 3055, 3717, 3394, 8651, 3662, 6770, 4684, 3594, 5468, 816, 6357, 11074, 4360, 6375, 7294, 6846, 10344
hsa04670	Leukocyte transendothelial migration	KEGG	101	yes	-0.142514	0.867175	0.00085	0.00699587	down	71, 50848, 3383, 7412, 2773, 5747, 4318, 5829, 3689, 7852, 5603, 88, 5880, 7410, 9564, 8503, 5295, 5906, 1536, 6494, 2770, 4633, 3683, 5293, 100506658, 3684, 4689, 7409, 5579, 3676, 7122, 3702, 399, 29895, 10411, 137075, 5294, 653361, 23562, 7294, 5582
GO:0048714	positive regulation of oligodendrocyte differentiation	GOBP	10	yes	-0.279749	0.755973	0.000686	0.00700432	down	3065, 7852, 7161, 7097, 118738, 5468
hsa05144	Malaria	KEGG	45	yes	-0.182681	0.833034	0.000886	0.00702484	down	6382, 3383, 7412, 3689, 4233, 958, 3683, 7097, 2995, 948, 3569, 3820, 1440, 7124, 54106, 959, 3592
GO:0016303	1-phosphatidylinositol-3-kinase activity	GOMF	36	yes	-0.216081	0.80567	0.000499	0.00703951	down	2885, 8503, 5295, 2263, 472, 10818, 5293, 3667, 2247, 2246, 5294, 9365, 54106, 5288
GO:0035265	organ growth	GOBP	116	yes	-0.140945	0.868537	0.000693	0.00706455	down	27230, 2697, 5747, 10611, 5447, 3516, 7161, 1848, 2263, 10018, 4086, 596, 817, 54440, 28514, 2099, 2121, 32, 9472, 2247, 367, 5618, 54796, 4880, 5324, 2627, 23414, 3574, 7472, 768239, 5629, 2303, 6532, 2066, 5950
GO:0042976	activation of Janus kinase activity	GOBP	10	yes	-0.279524	0.756144	0.0007	0.00712526	down	6352, 3717, 8651, 11314, 5618, 51561
hsa03050	Proteasome	KEGG	42	yes	0.30642	1.35855	0.000935	0.00714458	up	5708, 5700, 10197, 5707, 5686, 7979, 5713, 5717, 51371, 5718
GO:0070664	negative regulation of leukocyte proliferation	GOBP	64	yes	-0.175531	0.839011	0.000704	0.00715612	down	2950, 53833, 3620, 7128, 1739, 3965, 1051, 5585, 8764, 3635, 472, 6693, 10385, 50943, 26279, 8654, 3559, 11314, 7940, 11326, 1493, 2796, 23495, 6375, 51083
GO:0032845	negative regulation of homeostatic process	GOBP	197	yes	-0.127618	0.88019	0.000708	0.00718665	down	972, 801, 4283, 415116, 7128, 11151, 7351, 9446, 5788, 4254, 55226, 6363, 596, 817, 3635, 54552, 6717, 1756, 472, 4644, 8915, 7014, 10345, 55636, 3932, 65057, 3708, 1193, 1234, 9001, 1236, 9472, 2247, 845, 6263, 6546, 930, 3569, 5587, 623, 8989, 3579, 1812, 6375, 3357, 51738
GO:1901673	regulation of mitotic spindle assembly	GOBP	11	yes	0.420308	1.52243	0.00071	0.00719689	up	5119, 57132, 9525, 27243, 51510, 5347, 25978
GO:0030990	intraciliary transport particle	GOCC	37	yes	-0.208315	0.811951	0.00112921	0.007236	down	51098, 26160, 9742, 79809, 57728, 11020, 57539, 8100, 79989, 199223
GO:0071426	ribonucleoprotein complex export from nucleus	GOBP	141	yes	0.196833	1.21754	0.000718	0.00725607	up	5901, 84248, 9775, 7979, 22916, 9939, 8683, 10189, 65083, 1977, 9785, 53981, 9688, 51068, 4686, 79902, 55677, 81608, 55308, 84946, 79023, 8106
GO:0000470	maturation of LSU-rRNA	GOBP	25	yes	0.343726	1.41019	0.000718	0.00725607	up	11224, 23481, 55651, 4839, 23560, 54881, 55759
GO:0019722	calcium-mediated signaling	GOBP	160	yes	-0.134988	0.873726	0.000719	0.00725607	down	488, 801, 10134, 4915, 7412, 7852, 6364, 9446, 920, 5341, 817, 6717, 1756, 916, 1827, 4644, 90550, 925, 83988, 10345, 1907, 3708, 1193, 9455, 1234, 1672, 9001, 27040, 9472, 7535, 845, 79772, 2833, 695, 6546, 84174, 1235, 63928, 4773, 2205, 50852, 8600, 3357, 168620
GO:0051092	positive regulation of NF-kappaB transcription factor activity	GOBP	139	yes	-0.135697	0.873107	0.000724	0.00727842	down	4057, 4792, 3383, 8837, 4791, 9208, 81603, 3689, 4790, 3965, 7334, 7186, 9175, 101, 29108, 148022, 83696, 958, 7185, 5610, 10454, 8915, 7097, 3656, 11213, 5579, 367, 695, 6283, 5587, 121268, 7124, 1896, 54106, 8600, 959, 8995
GO:0031341	regulation of cell killing	GOBP	54	yes	-0.185828	0.830416	0.000724	0.00727842	down	3383, 3965, 5788, 6318, 10018, 5817, 2150, 3902, 7409, 114836, 3575, 3594, 4068, 51561, 56253, 2208, 146850, 26228, 10666, 259197, 3592, 6375
GO:0010501	RNA secondary structure unwinding	GOBP	35	yes	0.30575	1.35764	0.000734	0.00735973	up	9775, 79039, 54606, 55661, 170506, 55308, 11056, 55794, 55510
GO:0065002	intracellular protein transmembrane transport	GOBP	57	yes	0.28081	1.3242	0.000734	0.00735973	up	3320, 10452, 6729, 100287932, 10440, 83752, 80273, 9409, 5191
GO:0030168	platelet activation	GOBP	157	yes	-0.129874	0.878206	0.000735	0.00736252	down	71, 7534, 928, 1192, 207, 5912, 7450, 5359, 8525, 2769, 3611, 5880, 7410, 10630, 2768, 5295, 5341, 958, 114897, 558, 6812, 83706, 2534, 3937, 5156, 408, 3932, 7301, 3708, 54331, 388552, 27040, 10461, 7409, 7535, 5579, 23657, 2157, 239, 3569, 5294, 89780, 2153, 146850, 2811, 959, 7294, 5582, 64805, 80739
GO:0009408	response to heat	GOBP	154	yes	0.177444	1.19416	0.000754	0.00752495	up	3320, 10728, 2288, 26509, 207, 9531, 2932, 573, 3281, 11168, 56892, 1965, 10294, 9688, 9529, 1967, 79902, 84918, 55466, 94241, 817, 472, 27000, 8891, 79023, 23411, 26973, 51393, 2246, 3569, 6489, 22797, 816, 3305, 286133
GO:0002562	somatic diversification of immune receptors via germline recombination within a single locus	GOBP	58	yes	-0.181968	0.833628	0.000759	0.00755022	down	9466, 958, 472, 6932, 51010, 9025, 118460, 50943, 7292, 3981, 10538, 1235, 940, 23529, 200558, 30009, 959, 57379
GO:0016444	somatic cell DNA recombination	GOBP	58	yes	-0.181968	0.833628	0.000759	0.00755022	down	9466, 958, 472, 6932, 51010, 9025, 118460, 50943, 7292, 3981, 10538, 1235, 940, 23529, 200558, 30009, 959, 57379
GO:0032620	interleukin-17 production	GOBP	21	yes	-0.234822	0.790711	0.00077	0.00764447	down	23180, 3071, 50943, 7292, 3600, 114836, 51561, 4063, 3592
GO:0071166	ribonucleoprotein complex localization	GOBP	144	yes	0.193482	1.21347	0.000773	0.00766948	up	5901, 84248, 9775, 7979, 22916, 9939, 8683, 10189, 65083, 1977, 9785, 53981, 9688, 51068, 4686, 79902, 55677, 81608, 55308, 84946, 79023, 8106
GO:0072503	cellular divalent inorganic cation homeostasis	GOBP	378	yes	-0.0982107	0.906458	0.000775	0.00767775	down	7009, 488, 801, 10134, 4283, 2697, 79572, 27020, 7852, 11151, 2769, 309, 9709, 6352, 4501, 55858, 9446, 5310, 1604, 54499, 5788, 920, 489, 6363, 596, 817, 57620, 6717, 94107, 958, 1756, 114897, 2053, 8048, 4644, 90550, 1043, 3717, 624, 5156, 55013, 10345, 55636, 1907, 3932, 793, 3708, 57181, 1193, 2150, 84239, 1234, 2099, 9001, 1236, 5734, 1903, 9472, 5579, 2247, 64072, 4828, 9914, 948, 3792, 845…
GO:0032426	stereocilium tip	GOCC	5	yes	0.502489	1.65283	0.00121274	0.00770957	up	9368, 9455
GO:0006699	bile acid biosynthetic process	GOBP	24	yes	-0.241044	0.785807	0.000784	0.007745	down	6342, 1593, 23411, 6770, 9420, 5629
GO:0005814	centriole	GOCC	97	yes	-0.143075	0.866689	0.0012328	0.00777538	down	5901, 5108, 899, 121441, 10769, 55165, 4957, 55125, 9859, 84461, 51098, 153241, 9814, 10039, 55835, 9662, 9001, 85302, 57639, 56890, 10198, 54806, 57519, 8100, 79841
GO:0005980	glycogen catabolic process	GOBP	29	yes	0.341769	1.40743	0.000802	0.00786618	up	5500, 801, 5836, 5257, 2992, 5255
GO:0009251	glucan catabolic process	GOBP	29	yes	0.341769	1.40743	0.000802	0.00786618	up	5500, 801, 5836, 5257, 2992, 5255
GO:0044247	cellular polysaccharide catabolic process	GOBP	29	yes	0.341769	1.40743	0.000802	0.00786618	up	5500, 801, 5836, 5257, 2992, 5255
GO:0006368	transcription elongation from RNA polymerase II promoter	GOBP	99	yes	0.21851	1.24422	0.000814	0.00797629	up	22916, 22936, 1025, 6924, 4686, 5437, 8812, 5432, 84337, 2958, 123169, 9025, 404672, 6875
GO:0045059	positive thymic T cell selection	GOBP	9	yes	-0.284697	0.752242	0.000819	0.00800713	down	972, 8456, 1794, 915, 7535
GO:0072073	kidney epithelium development	GOBP	133	yes	-0.135837	0.872985	0.00082	0.00800713	down	4070, 6382, 3911, 4609, 1739, 4643, 5310, 3611, 4089, 5420, 9688, 2263, 4086, 596, 2719, 650, 4092, 28514, 793, 384, 51804, 5727, 2247, 54806, 2246, 30812, 6092, 5979, 9244, 168667, 65266, 4091, 2045, 2138, 3579, 6492, 2303, 3207, 4868, 7475
GO:0019674	NAD metabolic process	GOBP	57	yes	0.278281	1.32086	0.000851	0.00827311	up	2597, 226, 7167, 5230, 5223, 3945, 4191, 10135, 3099, 5214, 5209, 4860, 2026, 55191, 8942, 5208, 5210, 23498, 23475, 130752
GO:1990351	transporter complex	GOCC	262	yes	-0.10521	0.900135	0.00132914	0.00831754	down	483, 1192, 801, 2017, 56262, 6337, 2568, 1739, 9709, 20, 29796, 6844, 817, 6338, 90550, 5142, 8514, 91404, 55013, 26521, 10345, 134957, 9424, 1193, 26047, 2903, 6340, 9472, 782, 3749, 2906, 845, 6263, 8506, 486, 126129, 94015, 30818, 22941, 3750, 27092, 3786, 3762, 6616, 54831, 6900, 3779, 3738, 9312, 6335, 1258, 3359, 2561, 1139, 3743, 3737, 1740, 55800, 8973, 2563, 3756, 30819, 343450, 778, 962…
GO:0050798	activated T cell proliferation	GOBP	35	yes	-0.200582	0.818254	0.000873	0.00846776	down	3965, 29108, 11119, 23308, 2534, 10385, 50943, 7292, 3559, 3594, 51561, 6504, 11148
GO:0016713	oxidoreductase activity, acting on paired donors, with incorporation or reduction of molecular oxygen, reduced iron-sulfur protein as one donor, and incorporation of one atom of oxygen	GOMF	4	yes	-0.416148	0.659583	0.000618	0.00863738	down	66002, 1583
GO:0009108	coenzyme biosynthetic process	GOBP	178	yes	0.186304	1.20479	0.0009	0.00870792	up	6319, 9524, 8566, 2194, 10135, 47, 27430, 27249, 64834, 60481, 2181, 2180, 6576, 4860, 84532, 51144, 79966, 57017, 80308, 55191, 55163, 8942, 1737, 25902, 5860, 4199, 32, 51805, 57546, 5805, 79071, 8034, 23590, 23498, 23475, 23305, 4143, 284486
GO:1900271	regulation of long-term synaptic potentiation	GOBP	14	yes	-0.25512	0.774824	0.000902	0.0087207	down	27020, 2903, 23373, 1524, 54413
GO:0001774	microglial cell activation	GOBP	13	yes	-0.259738	0.771253	0.000906	0.00874833	down	7097, 90865, 10333, 51284, 1524, 26228
GO:0007067	mitotic nuclear division	GOBP	458	yes	0.105775	1.11157	0.000908	0.0087531	up	6152, 5901, 80218, 2029, 11331, 54461, 8766, 10776, 7756, 4605, 6249, 5119, 80346, 57132, 9525, 5902, 146691, 27243, 2801, 8607, 387893, 27183, 23126, 23332, 51510, 11113, 5347, 51529, 23113, 899, 348235, 91782, 8812, 121441, 25847, 221035, 23047, 901, 11044, 6990, 25978, 29882, 55055, 55320, 4739, 472, 55142, 201254, 55726, 7517, 283489, 7443, 10910, 51547, 10381, 79023, 2669, 9025, 83461, 11479…
GO:0050901	leukocyte tethering or rolling	GOBP	18	yes	-0.246584	0.781466	0.00092	0.00884255	down	7412, 50512, 3695, 3676, 7124
GO:0001779	natural killer cell differentiation	GOBP	20	yes	-0.239315	0.787167	0.000923	0.00884255	down	3398, 558, 5293, 7301, 10461, 3600, 2323, 114836, 6504
GO:0050657	nucleic acid transport	GOBP	200	yes	0.167667	1.18254	0.000923	0.00884255	up	5901, 84248, 9775, 7979, 22916, 9939, 5902, 8683, 10189, 65083, 1977, 9785, 53981, 9688, 4686, 59343, 79902, 55677, 81608, 10644, 23180, 55308, 79023, 8106, 64901, 10642, 3800
GO:0050658	RNA transport	GOBP	200	yes	0.167667	1.18254	0.000923	0.00884255	up	5901, 84248, 9775, 7979, 22916, 9939, 5902, 8683, 10189, 65083, 1977, 9785, 53981, 9688, 4686, 59343, 79902, 55677, 81608, 10644, 23180, 55308, 79023, 8106, 64901, 10642, 3800
GO:0015931	nucleobase-containing compound transport	GOBP	239	yes	0.154875	1.16751	0.00093	0.00889881	up	5901, 2697, 84248, 9775, 7979, 22916, 9939, 5902, 8683, 10189, 65083, 1977, 9785, 53981, 9688, 4686, 59343, 79902, 55677, 81608, 10237, 7355, 10644, 23180, 55308, 79023, 8106, 11046, 55315, 64901, 10642, 3800
GO:0035721	intraciliary retrograde transport	GOBP	10	yes	-0.283148	0.753409	0.000936	0.00891348	down	9742, 79809, 57728, 57539, 199223
GO:0050706	regulation of interleukin-1 beta secretion	GOBP	24	yes	-0.224312	0.799066	0.000941	0.00894885	down	3965, 79792, 6363, 29108, 22861, 22900, 1236, 260434
GO:0008306	associative learning	GOBP	57	yes	-0.176693	0.838037	0.000946	0.00898091	down	3091, 7832, 9775, 27020, 8704, 4204, 23259, 3815, 1497, 2903, 6616, 1139, 1812, 54413, 1621, 81832, 2917
GO:0061333	renal tubule morphogenesis	GOBP	72	yes	-0.166551	0.846579	0.000951	0.00901135	down	4070, 3911, 4609, 1739, 5310, 3611, 4089, 596, 2719, 650, 51804, 5727, 2247, 54806, 2246, 30812, 8549, 65266, 2138, 3207, 7475
GO:0032088	negative regulation of NF-kappaB transcription factor activity	GOBP	58	yes	-0.172648	0.841434	0.000958	0.00905689	down	4792, 9314, 8887, 7128, 307, 5716, 29108, 1545, 408, 3656, 11213, 23411, 50943, 197358, 171392, 260434, 54106
GO:0006353	DNA-templated transcription, termination	GOBP	102	yes	0.20513	1.22769	0.000958	0.00905689	up	9775, 22916, 9939, 8683, 10189, 9785, 53981, 4686, 5437, 81608, 1478, 7270, 8106, 404672, 10849, 134353
GO:0009124	nucleoside monophosphate biosynthetic process	GOBP	129	yes	0.222552	1.24926	0.000961	0.00907077	up	226, 6774, 518, 8833, 10476, 9551, 353, 7372, 205, 3251, 7298, 272, 7378, 122622, 1723
GO:0043433	negative regulation of sequence-specific DNA binding transcription factor activity	GOBP	117	yes	-0.138089	0.871021	0.000972	0.00911186	down	4792, 11331, 9314, 8887, 7128, 23028, 10221, 5292, 307, 5716, 29108, 3398, 1545, 59307, 51684, 408, 3656, 6045, 84662, 4092, 11213, 23411, 2099, 4294, 50943, 5727, 7292, 197358, 7293, 171392, 260434, 54106, 5629, 6375
GO:0002440	production of molecular mediator of immune response	GOBP	156	yes	-0.12993	0.878157	0.000978	0.00915447	down	972, 7009, 1739, 1604, 7186, 5788, 5585, 9466, 51237, 8764, 958, 3718, 355, 8915, 54440, 7097, 11213, 51010, 9025, 23411, 3815, 2150, 5650, 90865, 118460, 50943, 7292, 5452, 9452, 10225, 3981, 10673, 948, 10538, 3575, 695, 25818, 1235, 3569, 940, 3077, 54900, 7293, 6556, 23529, 200558, 6504, 7124, 54210, 117854, 30009, 2867, 29802, 959, 10666, 133396, 6375, 5950, 57379
GO:0042035	regulation of cytokine biosynthetic process	GOBP	96	yes	-0.15275	0.858344	0.000987	0.00920696	down	9314, 3659, 4790, 6364, 1051, 7072, 920, 28951, 1536, 148022, 3635, 10644, 916, 8915, 59307, 4050, 6693, 3902, 3662, 50943, 7096, 10333, 2069, 3569, 79589, 940, 64170, 10642, 3625, 7124, 51284, 2205, 729230, 10148, 54106, 941, 115650, 51738
GO:0002861	regulation of inflammatory response to antigenic stimulus	GOBP	16	yes	-0.245817	0.782066	0.000987	0.00920696	down	53833, 6693, 1236, 695, 940, 7124, 2205, 4049, 1268
GO:0034121	regulation of toll-like receptor signaling pathway	GOBP	50	yes	-0.186453	0.829898	0.00099	0.00922553	down	330, 4057, 29979, 3659, 7128, 148022, 7097, 11213, 92747, 7301, 2150, 2099, 7100, 3662, 27293, 26191, 23098, 54106, 353376
GO:0043372	positive regulation of CD4-positive, alpha-beta T cell differentiation	GOBP	26	yes	-0.221066	0.801664	0.00100723	0.00936925	down	301, 3965, 6363, 54440, 3071, 9308, 4602, 50943, 7292, 3569, 3594, 51561, 941
GO:2000058	regulation of protein ubiquitination involved in ubiquitin-dependent protein catabolic process	GOBP	92	yes	0.20904	1.23249	0.00100932	0.00937522	up	5708, 5700, 10197, 5747, 5707, 5686, 5713, 5717, 5347, 51529, 7324, 5718, 5716, 29882, 51684, 3077, 1950
GO:0043123	positive regulation of I-kappaB kinase/NF-kappaB signaling	GOBP	188	yes	-0.11781	0.888864	0.00101484	0.00941286	down	330, 4057, 10537, 389, 9516, 2697, 10342, 7132, 8837, 4055, 1893, 8795, 81603, 3965, 56892, 7205, 7334, 7186, 54602, 11040, 79971, 10769, 6363, 9020, 148022, 57449, 958, 8915, 2534, 7097, 23390, 55504, 2150, 939, 1236, 5579, 6285, 10333, 948, 6283, 8809, 64170, 51561, 5587, 7124, 51284, 10913, 356, 1896, 54106, 8740, 8600, 541468, 3357, 353376
GO:0032147	activation of protein kinase activity	GOBP	290	yes	-0.100904	0.90402	0.00102368	0.00946848	down	972, 7295, 6464, 1849, 8795, 1739, 2889, 7852, 2011, 6352, 7186, 200958, 1942, 5604, 9175, 7161, 5585, 1848, 5606, 5906, 101, 6363, 9020, 4214, 7867, 55704, 112, 5610, 10454, 10818, 29775, 4188, 115, 5567, 3071, 3717, 408, 650, 4616, 3656, 8651, 3815, 1326, 11184, 1946, 4294, 2247, 9294, 10333, 9966, 2246, 5577, 727, 11314, 5618, 10912, 51561, 6556, 7124, 2205, 2258, 8600, 1139, 959, 1950, 4908, …
GO:0006417	regulation of translation	GOBP	367	yes	0.120148	1.12766	0.00102378	0.00946848	up	2597, 1981, 7458, 6774, 5901, 10492, 8662, 9612, 27230, 1983, 8668, 678, 9669, 207, 7832, 10480, 25946, 9775, 9611, 51714, 22916, 9939, 83939, 6352, 1965, 5187, 4690, 23185, 23405, 51123, 5604, 8669, 1977, 1978, 7072, 54915, 6199, 246175, 8872, 4686, 1967, 4086, 2309, 9470, 9933, 7298, 10644, 5610, 55239, 4528, 80315, 10289, 65080, 5997, 8891, 51204, 91574, 3396, 57690, 79693, 2099, 9001, 400961,…
GO:0071887	leukocyte apoptotic process	GOBP	90	yes	-0.151169	0.859703	0.00102892	0.00950233	down	972, 301, 6950, 3091, 207, 7157, 3620, 3965, 6352, 1942, 5585, 4254, 101, 10018, 6363, 3718, 558, 355, 81704, 8915, 23411, 57181, 939, 1236, 10461, 3559, 155038, 84524, 695, 5133, 3569, 917, 356, 3579
GO:0016236	macroautophagy	GOBP	279	yes	0.140191	1.15049	0.00103123	0.00951009	up	2597, 8878, 7879, 8655, 11140, 29979, 3091, 5861, 3099, 523, 533, 9550, 9868, 10452, 9114, 9517, 10558, 93974, 26100, 5899, 64422, 79837, 55004, 8396, 58476, 55669, 51382, 401505, 23673, 51606, 94241, 9711, 57724, 200576, 5564, 664, 5305, 57231, 55054, 22863, 7405, 5565, 23411, 115201, 8851, 11178, 83452, 8100, 285973, 128077, 245973, 9363, 525
GO:0006888	ER to Golgi vesicle-mediated transport	GOBP	190	yes	0.162203	1.1761	0.00103631	0.00954326	up	375, 1778, 10134, 8655, 22820, 3998, 9276, 1075, 10342, 8775, 10945, 5861, 6712, 10652, 2801, 6653, 55291, 1604, 5537, 1781, 23423, 84516, 9871, 4905, 83696, 23259, 10490, 5627, 29097, 83548, 9183, 51226, 64788, 2157, 89866, 2153, 1780, 374
GO:0044743	intracellular protein transmembrane import	GOBP	52	yes	0.286279	1.33146	0.00104416	0.0096018	up	3320, 10452, 100287932, 10440, 83752, 80273, 9409, 5191
GO:0032731	positive regulation of interleukin-1 beta production	GOBP	27	yes	-0.215935	0.805788	0.00104703	0.00960438	down	3428, 3965, 79792, 6363, 29108, 22861, 3717, 22900, 3670, 260434
GO:1903362	regulation of cellular protein catabolic process	GOBP	257	yes	0.13673	1.14652	0.00104743	0.00960438	up	5708, 10134, 6613, 5887, 10755, 5886, 1075, 29979, 207, 5700, 5045, 4193, 10197, 5747, 8078, 5707, 7128, 25897, 5686, 6386, 2932, 127544, 5713, 10221, 9709, 5717, 55905, 5310, 9683, 93974, 51667, 5347, 369, 25820, 51529, 2768, 1855, 7324, 28951, 9529, 5718, 10769, 5716, 64326, 51377, 29882, 55270, 51684, 4092, 1263, 90865, 115992, 90637, 85409, 144165, 79589, 3077, 54941, 7480, 1950, 5582
GO:0042430	indole-containing compound metabolic process	GOBP	30	yes	-0.24135	0.785567	0.00105507	0.00966068	down	3620, 8942, 2903, 23498, 491, 169355
GO:0033572	transferrin transport	GOBP	35	yes	0.305052	1.3567	0.00105981	0.00969036	up	523, 533, 9550, 9114, 51382, 51606, 4891, 7018, 245973, 525
GO:0033688	regulation of osteoblast proliferation	GOBP	19	yes	-0.234448	0.791007	0.00106675	0.00973992	down	4057, 3685, 2263, 596, 5610, 650, 30812
GO:1904666	regulation of ubiquitin protein ligase activity	GOBP	85	yes	0.219651	1.24564	0.0010713	0.00975113	up	5708, 5700, 10197, 5707, 5686, 5713, 5717, 5347, 51529, 7324, 5718, 5716, 29882, 286151
GO:0010721	negative regulation of cell development	GOBP	249	yes	-0.105441	0.899928	0.00107157	0.00975113	down	4070, 6774, 396, 2288, 4057, 57142, 23603, 4193, 5108, 5747, 1809, 2932, 6653, 6696, 4089, 23405, 1942, 57534, 7161, 1977, 9139, 4804, 9423, 54910, 5764, 9529, 10769, 2309, 3398, 8829, 596, 23189, 57556, 112, 9037, 81559, 22902, 23111, 9706, 23108, 28514, 23105, 1946, 4038, 1903, 8851, 11202, 25791, 30812, 2487, 4613, 4880, 89780, 30012, 223117, 3670, 27124, 2045, 6900, 152330, 2258, 26052, 2796,…
GO:0000982	transcription factor activity, RNA polymerase II core promoter proximal region sequence-specific binding	GOMF	294	yes	-0.102155	0.90289	0.000708	0.00978695	down	4904, 8626, 6774, 688, 3428, 9314, 3659, 3091, 4782, 4609, 7832, 4605, 4791, 1052, 5359, 79755, 51043, 2120, 2113, 3516, 4084, 4089, 9603, 7161, 29841, 1051, 7528, 1874, 23186, 80709, 4799, 4774, 5017, 7008, 4086, 53335, 9915, 4929, 7022, 200014, 8061, 3131, 6688, 84662, 4602, 23109, 79365, 90993, 57593, 51804, 2099, 3662, 2313, 3642, 5452, 367, 54345, 10538, 5308, 4603, 253738, 8091, 5324, 2624,…
GO:1903050	regulation of proteolysis involved in cellular protein catabolic process	GOBP	234	yes	0.141858	1.15241	0.00107855	0.00979218	up	5708, 10134, 6613, 5887, 10755, 5886, 1075, 29979, 207, 5700, 4193, 10197, 5747, 8078, 5707, 25897, 5686, 6386, 2932, 127544, 5713, 10221, 9709, 5717, 55905, 5310, 9683, 93974, 51667, 5347, 369, 25820, 51529, 2768, 1855, 7324, 28951, 9529, 5718, 10769, 5716, 64326, 51377, 29882, 55270, 51684, 4092, 1263, 90865, 115992, 90637, 85409, 144165, 3077, 54941, 7480, 1950, 5582
GO:0007612	learning	GOBP	107	yes	-0.143098	0.866669	0.00108708	0.00984182	down	4915, 3091, 7832, 9775, 27020, 8704, 4204, 5764, 23259, 8061, 2534, 26047, 3815, 1497, 2903, 7122, 5577, 10396, 22943, 22941, 6543, 2019, 6616, 6900, 2258, 9378, 1139, 23237, 1812, 54413, 25769, 1621, 81832, 2917
GO:0006733	oxidoreduction coenzyme metabolic process	GOBP	171	yes	0.188472	1.2074	0.00108869	0.00984184	up	2597, 226, 7167, 5230, 6774, 7086, 5223, 3945, 4191, 10135, 3091, 3099, 5214, 9611, 5209, 4860, 2026, 57017, 51071, 55191, 51181, 8942, 8514, 5208, 4199, 5210, 51805, 23590, 23498, 23475, 130752
GO:0002532	production of molecular mediator involved in inflammatory response	GOBP	37	yes	-0.195182	0.822685	0.00109069	0.00984184	down	7850, 3620, 5187, 6542, 63940, 923, 10225, 695, 3605
GO:0045582	positive regulation of T cell differentiation	GOBP	63	yes	-0.17046	0.843276	0.00109167	0.00984184	down	972, 301, 3965, 4860, 101, 6363, 54440, 3071, 9308, 4602, 50943, 7535, 7292, 3559, 3575, 3569, 3594, 51561, 3574, 8808, 146850, 941, 3592
GO:0051961	negative regulation of nervous system development	GOBP	238	yes	-0.107205	0.898341	0.00110443	0.00992732	down	6774, 396, 2288, 57142, 4193, 5108, 5747, 1809, 2932, 6653, 6696, 23405, 1942, 57534, 7161, 1977, 9139, 4804, 9423, 54910, 5764, 9529, 10769, 2309, 3398, 8829, 23189, 57556, 112, 9037, 81559, 5567, 22902, 23111, 51684, 9706, 23108, 28514, 23105, 4038, 8851, 23432, 11202, 25791, 30812, 6092, 4613, 89780, 30012, 223117, 3670, 27124, 2045, 6900, 152330, 2258, 26052, 2796, 57715, 7476, 57540, 26228, …
GO:0006968	cellular defense response	GOBP	43	yes	-0.186618	0.82976	0.00110682	0.00992732	down	3959, 4283, 8915, 8061, 10578, 5551, 6693, 1234, 3702, 135, 930, 1235, 4068, 653361, 729230, 8808, 50852, 1524, 3579, 10219, 11126
GO:0051436	negative regulation of ubiquitin-protein ligase activity involved in mitotic cell cycle	GOBP	71	yes	0.231365	1.26032	0.00110807	0.00992732	up	5708, 5700, 10197, 5707, 5686, 5713, 5717, 51529, 7324, 5718, 5716, 29882, 286151
GO:0043551	regulation of phosphatidylinositol 3-kinase activity	GOBP	42	yes	-0.192049	0.825267	0.00110886	0.00992732	down	9314, 5747, 7410, 8503, 5295, 113791, 6363, 9711, 2321, 5156, 22863, 3667, 3815, 1236, 2247, 2268, 146850, 2322, 2046
GO:0000315	organellar large ribosomal subunit	GOCC	34	yes	0.299059	1.34859	0.00168769	0.0100883	up	11222, 6182, 57129, 54948, 219927, 91574, 3396, 26589, 84769, 63899
GO:0005762	mitochondrial large ribosomal subunit	GOCC	34	yes	0.299059	1.34859	0.00168769	0.0100883	up	11222, 6182, 57129, 54948, 219927, 91574, 3396, 26589, 84769, 63899
GO:0010803	regulation of tumor necrosis factor-mediated signaling pathway	GOBP	47	yes	-0.183674	0.832207	0.0011551	0.0103126	down	2950, 330, 7132, 8887, 7128, 7186, 29108, 7185, 25999, 2150, 7124, 171392, 260434
GO:0034248	regulation of cellular amide metabolic process	GOBP	396	yes	0.114421	1.12122	0.00116094	0.0103504	up	2597, 1981, 7458, 6774, 5901, 5223, 10492, 8662, 9612, 27230, 1983, 8668, 678, 9669, 207, 7832, 7132, 10480, 25946, 9775, 9611, 51714, 22916, 9939, 83939, 6352, 6653, 1965, 5187, 4690, 23185, 23405, 51123, 5604, 8669, 94103, 1977, 1978, 7072, 54915, 6199, 246175, 8872, 4686, 1967, 4086, 2309, 9470, 9933, 7298, 10644, 5610, 55239, 4528, 29095, 80315, 10289, 65080, 5997, 8891, 51204, 91574, 3396, 5…
GO:0010288	response to lead ion	GOBP	12	yes	-0.261969	0.769535	0.00116416	0.0103647	down	1371, 5860, 6770
GO:0003729	mRNA binding	GOMF	158	yes	0.174637	1.19081	0.000777	0.0105398	up	3320, 11224, 678, 54845, 8932, 84248, 25946, 9775, 22916, 9939, 58517, 80004, 51081, 55544, 4204, 9933, 7298, 10644, 80153, 84081, 80315, 1478, 10642, 4857, 56853, 9271
GO:0060590	ATPase regulator activity	GOMF	36	yes	0.318631	1.37524	0.000779	0.0105398	up	483, 9531, 573, 10598, 5217, 93974, 54431, 163590, 9529, 80273, 27000, 9024
GO:0051444	negative regulation of ubiquitin-protein transferase activity	GOBP	81	yes	0.220187	1.24631	0.00119314	0.0105792	up	5708, 5700, 10197, 5707, 5686, 5713, 5717, 51529, 7324, 9529, 5718, 5716, 29882, 4092, 286151
GO:0097553	calcium ion transmembrane import into cytosol	GOBP	127	yes	-0.147515	0.86285	0.00119318	0.0105792	down	801, 4283, 11151, 9446, 5788, 6363, 817, 6717, 1756, 4644, 10345, 55636, 3932, 3708, 1193, 1234, 9001, 1236, 9472, 2247, 845, 6263, 6546, 930, 5587, 623, 8989, 1812, 6375, 3357
GO:1902656	calcium ion import into cytosol	GOBP	127	yes	-0.147515	0.86285	0.00119318	0.0105792	down	801, 4283, 11151, 9446, 5788, 6363, 817, 6717, 1756, 4644, 10345, 55636, 3932, 3708, 1193, 1234, 9001, 1236, 9472, 2247, 845, 6263, 6546, 930, 5587, 623, 8989, 1812, 6375, 3357
GO:0015266	protein channel activity	GOMF	10	yes	0.424975	1.52955	0.000794	0.0106058	up	4170, 10452, 100287932, 10440
GO:0003924	GTPase activity	GOMF	221	yes	0.147455	1.15888	0.0008	0.0106058	up	10383, 375, 7879, 5901, 2783, 163351, 1983, 8766, 9669, 5861, 7277, 2773, 397, 5878, 84617, 4976, 115361, 2769, 55341, 2787, 64225, 29889, 5880, 22931, 85476, 5899, 57403, 400, 2768, 3265, 28511, 5906, 23560, 55669, 6729, 2770, 6237, 54552, 7846, 29984, 4528, 1917, 403, 6016, 379, 10381, 22800, 23682, 2669, 85865, 7280, 29083, 122622, 166785, 168537, 83452, 2774, 23551, 2781, 11159, 148252, 54509…
GO:0016114	terpenoid biosynthetic process	GOBP	11	yes	0.429478	1.53645	0.00119818	0.0106089	up	2224, 220, 8644, 10170, 8854, 64577
GO:0051236	establishment of RNA localization	GOBP	203	yes	0.162326	1.17624	0.00122591	0.0108247	up	5901, 84248, 9775, 7979, 22916, 9939, 5902, 8683, 10189, 65083, 1977, 9785, 53981, 9688, 4686, 59343, 79902, 55677, 81608, 10644, 23180, 472, 55308, 79023, 8106, 64901, 10642, 3800
GO:0060193	positive regulation of lipase activity	GOBP	51	yes	-0.178318	0.836676	0.00123712	0.0109087	down	389, 2769, 6352, 400, 2263, 51099, 2321, 5156, 3815, 2099, 5330, 2247, 64788, 3702, 8698, 9290, 7294, 3357
GO:0042026	protein refolding	GOBP	22	yes	0.342316	1.40821	0.00124029	0.0109217	up	3320, 10728, 573, 10294, 9529, 55466, 3305
GO:0005977	glycogen metabolic process	GOBP	92	yes	0.233368	1.26285	0.0012524	0.0109832	up	5500, 801, 207, 3572, 2932, 5836, 7360, 2997, 5257, 2992, 7262, 3667, 5255, 5507, 89801, 5167, 648791
GO:0006073	cellular glucan metabolic process	GOBP	92	yes	0.233368	1.26285	0.0012524	0.0109832	up	5500, 801, 207, 3572, 2932, 5836, 7360, 2997, 5257, 2992, 7262, 3667, 5255, 5507, 89801, 5167, 648791
GO:0044042	glucan metabolic process	GOBP	92	yes	0.233368	1.26285	0.0012524	0.0109832	up	5500, 801, 207, 3572, 2932, 5836, 7360, 2997, 5257, 2992, 7262, 3667, 5255, 5507, 89801, 5167, 648791
hsa04940	Type I diabetes mellitus	KEGG	19	yes	-0.224968	0.798542	0.00150304	0.0110794	down	1363, 355, 5551, 940, 2571, 7124, 356, 4049, 941, 3592
hsa04010	MAPK signaling pathway	KEGG	232	yes	-0.10232	0.90274	0.00155318	0.0110794	down	4915, 2885, 4609, 207, 7850, 7132, 7157, 4791, 1849, 2318, 4790, 5603, 7186, 5880, 5971, 5058, 5604, 9175, 2768, 3265, 1848, 2263, 5606, 5906, 2122, 80824, 9020, 4214, 7867, 6237, 355, 10454, 5567, 1846, 10000, 5156, 408, 56940, 4616, 22800, 5778, 1326, 11184, 5579, 782, 2247, 26279, 2246, 25780, 10912, 63928, 10235, 27092, 4773, 7124, 356, 2258, 627, 3305, 1950, 4908, 778, 8913, 5582
GO:0005793	endoplasmic reticulum-Golgi intermediate compartment	GOCC	109	yes	0.195269	1.21564	0.00190286	0.0112073	up	5034, 2706, 10134, 3998, 1075, 10945, 10652, 2801, 1604, 81671, 23071, 23423, 23405, 203547, 9262, 50999, 64841, 23259, 51290, 29097, 51226, 2157, 2153, 374
GO:0042533	tumor necrosis factor biosynthetic process	GOBP	17	yes	-0.239172	0.787279	0.0012818	0.0112105	down	1536, 6693, 7096, 64170, 729230, 51738
GO:0042534	regulation of tumor necrosis factor biosynthetic process	GOBP	17	yes	-0.239172	0.787279	0.0012818	0.0112105	down	1536, 6693, 7096, 64170, 729230, 51738
GO:0030490	maturation of SSU-rRNA	GOBP	51	yes	0.270794	1.31101	0.00129753	0.0113327	up	84916, 10199, 88745, 10436, 27042, 705
GO:0051028	mRNA transport	GOBP	157	yes	0.176324	1.19282	0.00130443	0.0113775	up	84248, 9775, 7979, 22916, 9939, 8683, 10189, 1977, 9785, 53981, 9688, 4686, 59343, 79902, 55677, 81608, 10644, 55308, 79023, 8106, 64901, 10642, 3800
GO:1902624	positive regulation of neutrophil migration	GOBP	24	yes	-0.218259	0.803917	0.00130678	0.0113826	down	972, 5880, 101, 6363, 3071, 1236, 57118, 51561, 3579, 6375
GO:0015175	neutral amino acid transmembrane transporter activity	GOMF	26	yes	0.351784	1.4216	0.000868	0.0114024	up	8140, 6520, 347735, 6509, 256987, 92745, 55238, 23657
GO:0072078	nephron tubule morphogenesis	GOBP	67	yes	-0.166666	0.846483	0.00133848	0.011643	down	4070, 3911, 4609, 1739, 5310, 3611, 4089, 596, 2719, 650, 51804, 5727, 2247, 54806, 2246, 30812, 65266, 2138, 3207, 7475
GO:0031902	late endosome membrane	GOCC	88	yes	0.199186	1.22041	0.00200267	0.0117091	up	7879, 85377, 9146, 57132, 9525, 309, 27243, 55858, 27183, 11342, 55004, 54602, 55697, 4891, 25978, 200576, 57617, 10490, 57231, 84946, 23531, 55315, 6556, 353376
GO:0007632	visual behavior	GOBP	43	yes	-0.184559	0.831471	0.00135429	0.0117646	down	3091, 27020, 8704, 4204, 23259, 3815, 1497, 2903, 6506, 4867, 1812, 54413, 1621, 81832
GO:0043209	myelin sheath	GOCC	154	yes	0.15364	1.16607	0.00203204	0.0117946	up	71, 3320, 10383, 292, 5052, 2923, 7086, 3945, 7203, 7532, 7417, 2783, 4191, 6950, 10963, 8775, 2806, 523, 1739, 1152, 5306, 256987, 1808, 4719, 760, 2026, 5906, 4155, 4905, 596, 7846, 6812, 1917, 1737, 127281, 8803, 4747, 11076, 23114, 8506, 6616, 6900, 57471, 5354
GO:0044450	microtubule organizing center part	GOCC	147	yes	-0.122759	0.884477	0.00208215	0.0119986	down	5901, 6950, 5108, 23332, 899, 121441, 10769, 55165, 4957, 282991, 117178, 55125, 9859, 5142, 84461, 51098, 153241, 9814, 3932, 10039, 114791, 55835, 9662, 9001, 85302, 57639, 56890, 10198, 54806, 27241, 57519, 8100, 51364, 79841
GO:0004004	ATP-dependent RNA helicase activity	GOMF	64	yes	0.247985	1.28144	0.000937	0.0120094	up	9775, 79039, 54606, 9785, 55661, 170506, 6499, 55760, 55308, 11056, 55794, 55510, 92797
GO:0008186	RNA-dependent ATPase activity	GOMF	66	yes	0.247985	1.28144	0.000937	0.0120094	up	9775, 79039, 54606, 9785, 55661, 170506, 6499, 55760, 55308, 11056, 55794, 55510, 92797
GO:0052813	phosphatidylinositol bisphosphate kinase activity	GOMF	57	yes	-0.179062	0.836054	0.000942	0.0120094	down	2885, 4254, 5295, 2263, 8394, 1839, 10818, 5293, 2534, 5156, 3667, 3932, 3815, 7409, 2247, 2246, 2069, 930, 940, 5294, 50852, 9365, 146850, 941, 145957, 1950, 2066
GO:0051282	regulation of sequestering of calcium ion	GOBP	125	yes	-0.146683	0.863567	0.00138681	0.0120147	down	801, 4283, 11151, 9446, 5788, 6363, 817, 6717, 1756, 4644, 10345, 55636, 3932, 3708, 1193, 1234, 9001, 1236, 9472, 2247, 845, 6263, 6546, 930, 5587, 623, 8989, 1812, 6375, 3357
GO:0036452	ESCRT complex	GOCC	36	yes	0.319704	1.37672	0.0021207	0.0121335	up	5119, 9146, 57132, 27243, 51271, 27183, 91782, 84313, 25978, 8027
GO:0000460	maturation of 5.8S rRNA	GOBP	34	yes	0.299791	1.34958	0.00140631	0.0121397	up	23481, 23016, 23404, 51010, 55759, 11340, 112479, 10438
GO:1900015	regulation of cytokine production involved in inflammatory response	GOBP	18	yes	-0.234634	0.79086	0.0014069	0.0121397	down	7850, 5187, 63940, 923, 3605
GO:0002704	negative regulation of leukocyte mediated immunity	GOBP	41	yes	-0.194054	0.823613	0.00140956	0.0121463	down	53833, 29, 3965, 5788, 6318, 3718, 56940, 27342, 6693, 8832, 50943, 10225, 11314, 3575, 3077, 6504, 729230, 6375
GO:0070228	regulation of lymphocyte apoptotic process	GOBP	46	yes	-0.181628	0.833912	0.00141146	0.0121465	down	972, 3091, 7157, 3620, 3965, 6352, 1942, 101, 3718, 355, 81704, 8915, 57181, 939, 155038, 84524, 695, 5133, 917
GO:0032040	small-subunit processome	GOCC	35	yes	0.288232	1.33407	0.00214522	0.0121867	up	65083, 10199, 51118, 10436, 92856, 27042, 9136
GO:0002381	immunoglobulin production involved in immunoglobulin mediated immune response	GOBP	47	yes	-0.185365	0.830801	0.0014202	0.0122054	down	9466, 958, 51010, 9025, 118460, 50943, 7292, 5452, 3981, 10538, 1235, 940, 23529, 200558, 30009, 959, 6375, 57379
GO:0016627	oxidoreductase activity, acting on the CH-CH group of donors	GOMF	89	yes	0.262902	1.3007	0.00097	0.0122474	up	1718, 9524, 2194, 37, 2108, 64118, 1717, 28976, 644, 1646, 1371, 1645, 55316, 8644, 1723
GO:0032604	granulocyte macrophage colony-stimulating factor production	GOBP	12	yes	-0.265044	0.767172	0.00143411	0.0122921	down	8832, 51561, 3670, 2205, 54106, 941
GO:0032645	regulation of granulocyte macrophage colony-stimulating factor production	GOBP	11	yes	-0.265044	0.767172	0.00143411	0.0122921	down	8832, 51561, 3670, 2205, 54106, 941
GO:0016051	carbohydrate biosynthetic process	GOBP	205	yes	0.157728	1.17085	0.00144155	0.0123394	up	2597, 226, 7167, 5230, 5500, 7086, 5223, 4191, 10776, 207, 2806, 3038, 2932, 2131, 2820, 4790, 7360, 2997, 2132, 6652, 6576, 51477, 2026, 51363, 2992, 5341, 30815, 2525, 113189, 55808, 3667, 84649, 10331, 5507, 89801, 3569, 5167, 5105, 83539, 648791, 1950, 79369, 8707, 5950
GO:0014046	dopamine secretion	GOBP	13	yes	-0.254268	0.775484	0.00145902	0.0124393	down	1268, 3737, 8973, 1137
GO:0014059	regulation of dopamine secretion	GOBP	13	yes	-0.254268	0.775484	0.00145902	0.0124393	down	1268, 3737, 8973, 1137
GO:0034341	response to interferon-gamma	GOBP	132	yes	-0.13123	0.877016	0.00146691	0.0124901	down	2597, 960, 29927, 10492, 10537, 3383, 163351, 4502, 11140, 7412, 3659, 3459, 83666, 3460, 9021, 81603, 3965, 6364, 6352, 4938, 51667, 3660, 6363, 817, 8942, 4261, 3055, 3717, 3394, 8651, 3662, 6770, 4684, 3594, 1594, 6556, 5468, 816, 6357, 11074, 4360, 6375, 7294, 6846, 10344
hsa00983	Drug metabolism - other enzymes	KEGG	27	yes	0.34876	1.41731	0.00182053	0.0125675	up	8833, 8824, 7372, 3251, 3704, 7378, 1066, 51733, 978, 54575, 7367
GO:0014047	glutamate secretion	GOBP	33	yes	-0.198249	0.820165	0.00150881	0.0127961	down	10755, 4915, 1808, 2744, 6844, 6812, 27165, 9256, 6857, 6616, 6506, 22999, 2917
GO:0043279	response to alkaloid	GOBP	106	yes	-0.14052	0.868906	0.00152411	0.0128912	down	3320, 3065, 3383, 7412, 4193, 4790, 8683, 1808, 596, 221935, 5888, 9455, 9456, 6770, 23657, 845, 6263, 8997, 1723, 6546, 3569, 7124, 5468, 5021, 3359, 1268, 1139, 1812, 8973, 1137, 5582
GO:0051209	release of sequestered calcium ion into cytosol	GOBP	124	yes	-0.146347	0.863858	0.00152625	0.0128912	down	801, 4283, 11151, 9446, 5788, 6363, 817, 6717, 1756, 4644, 10345, 55636, 3932, 3708, 1193, 1234, 9001, 1236, 9472, 2247, 845, 6263, 6546, 930, 5587, 623, 8989, 1812, 6375, 3357
GO:0051283	negative regulation of sequestering of calcium ion	GOBP	124	yes	-0.146347	0.863858	0.00152625	0.0128912	down	801, 4283, 11151, 9446, 5788, 6363, 817, 6717, 1756, 4644, 10345, 55636, 3932, 3708, 1193, 1234, 9001, 1236, 9472, 2247, 845, 6263, 6546, 930, 5587, 623, 8989, 1812, 6375, 3357
GO:0031227	intrinsic component of endoplasmic reticulum membrane	GOCC	118	yes	0.181102	1.19854	0.00230817	0.012929	up	972, 29927, 6892, 10134, 9524, 57142, 6238, 1388, 550, 2131, 267, 54499, 64834, 60481, 1717, 91319, 8818, 10237, 57171, 22845, 166929, 9986, 84649, 219855, 1571, 79071, 10170, 7993, 26580
GO:0071872	cellular response to epinephrine stimulus	GOBP	12	yes	-0.264202	0.767818	0.0015371	0.0129338	down	5142, 6770
GO:0043370	regulation of CD4-positive, alpha-beta T cell differentiation	GOBP	35	yes	-0.199743	0.818941	0.00154501	0.0129833	down	301, 51043, 3965, 6363, 3718, 54440, 3071, 9308, 4602, 3662, 50943, 7292, 3569, 3594, 51561, 941, 8995
GO:0090501	RNA phosphodiester bond hydrolysis	GOBP	131	yes	0.180303	1.19758	0.00154881	0.0129983	up	7009, 22916, 55651, 23405, 53981, 246175, 4686, 167227, 88745, 80153, 54913, 10248, 23016, 23404, 1478, 10898, 25996, 65080, 51010, 11340, 112479, 246243, 440400, 6039, 6038, 10799, 201164, 84659, 563, 8909, 10595
GO:0007346	regulation of mitotic cell cycle	GOBP	490	yes	0.0970298	1.10189	0.00156193	0.0130913	up	2810, 301, 6152, 8626, 5708, 9368, 23326, 11331, 8766, 678, 7756, 207, 7832, 5700, 7157, 4193, 10197, 415116, 5707, 11073, 25946, 5119, 29766, 5686, 6386, 1739, 1163, 5713, 57132, 9525, 5902, 146691, 27243, 5717, 5310, 5546, 51510, 1027, 7161, 1977, 10630, 5347, 1978, 51529, 29117, 1874, 23113, 3265, 246175, 8872, 7324, 59343, 11040, 5718, 10769, 5017, 5716, 140609, 3398, 7508, 596, 817, 6990, 25…
GO:0008211	glucocorticoid metabolic process	GOBP	14	yes	-0.248802	0.779734	0.00156615	0.0131096	down	4204, 650, 6770, 3291, 1583, 51083
GO:0050868	negative regulation of T cell activation	GOBP	81	yes	-0.1547	0.856672	0.00160279	0.0133989	down	972, 301, 3659, 53833, 3620, 1739, 3965, 1051, 441478, 8764, 3718, 56940, 9306, 6693, 10385, 3902, 201633, 50943, 7292, 26279, 8654, 3559, 11314, 84524, 11326, 79679, 1493, 26191, 3077, 54900, 79626, 2796, 6375, 8995
GO:0009451	RNA modification	GOBP	163	yes	0.178857	1.19585	0.0016277	0.0135772	up	1736, 55651, 64118, 114049, 55226, 4839, 55505, 24140, 26995, 79876, 79066, 10436, 60489, 51605, 80324, 51093, 115708, 79693, 221120, 200316, 4234, 9836, 27079, 123263, 63899
GO:0050432	catecholamine secretion	GOBP	28	yes	-0.213411	0.807824	0.00162886	0.0135772	down	4204, 5021, 1268, 1139, 3737, 8973, 1137, 64805
GO:0045076	regulation of interleukin-2 biosynthetic process	GOBP	19	yes	-0.232917	0.79222	0.00163255	0.0135772	down	920, 916, 3902, 3662, 50943, 940, 64170, 941
GO:0060675	ureteric bud morphogenesis	GOBP	59	yes	-0.172227	0.841788	0.00164002	0.0136214	down	4070, 3911, 4609, 1739, 3611, 4089, 596, 2719, 650, 51804, 5727, 2247, 2246, 30812, 2138, 3207, 7475
GO:0060416	response to growth hormone	GOBP	34	yes	-0.20471	0.814883	0.00164211	0.0136214	down	6774, 207, 5747, 5829, 5295, 6776, 3718, 3717, 8835, 6770, 5618, 51738
GO:0072088	nephron epithelium morphogenesis	GOBP	69	yes	-0.162861	0.849709	0.00164773	0.0136505	down	4070, 3911, 4609, 1739, 5310, 3611, 4089, 596, 2719, 650, 51804, 5727, 2247, 54806, 2246, 30812, 65266, 2138, 3207, 7475
GO:0002724	regulation of T cell cytokine production	GOBP	20	yes	-0.232769	0.792337	0.00165341	0.0136792	down	7186, 54440, 50943, 7292, 3569, 3077, 6504, 6375
GO:1904667	negative regulation of ubiquitin protein ligase activity	GOBP	74	yes	0.221904	1.24845	0.00165544	0.0136792	up	5708, 5700, 10197, 5707, 5686, 5713, 5717, 51529, 7324, 5718, 5716, 29882, 286151
GO:0007606	sensory perception of chemical stimulus	GOBP	41	yes	-0.186352	0.829981	0.00166989	0.0137808	down	6337, 89797, 6338, 6340, 5330, 948, 2774, 563, 7480, 51308, 54831, 8989, 1258, 83597, 123041, 341359, 2917
GO:0072498	embryonic skeletal joint development	GOBP	14	yes	0.380626	1.4632	0.00167444	0.0137977	up	2131, 6474, 3373, 1280, 3207
GO:0046622	positive regulation of organ growth	GOBP	36	yes	-0.195363	0.822536	0.00168349	0.0138399	down	27230, 3516, 2263, 54440, 32, 9472, 2247, 2627, 23414, 3574, 7472, 5629, 2066
GO:0033690	positive regulation of osteoblast proliferation	GOBP	10	yes	-0.26903	0.76412	0.00170488	0.013959	down	4057, 3685, 650, 30812
GO:0035376	sterol import	GOBP	7	yes	0.460232	1.58444	0.00170622	0.013959	up	3949, 55004, 948
GO:0070508	cholesterol import	GOBP	7	yes	0.460232	1.58444	0.00170622	0.013959	up	3949, 55004, 948
GO:0045860	positive regulation of protein kinase activity	GOBP	488	yes	-0.0812426	0.92197	0.00171057	0.0139723	down	972, 801, 7295, 4057, 207, 5747, 6464, 1849, 8795, 1739, 1163, 2889, 7852, 10006, 2011, 6352, 5310, 7186, 3611, 200958, 5058, 1942, 5899, 57216, 5788, 5604, 9175, 1027, 2180, 7161, 11235, 5585, 920, 4254, 3265, 1848, 5606, 5906, 101, 8812, 6363, 1436, 1435, 5716, 9020, 7164, 4214, 7867, 958, 55704, 112, 5610, 10454, 10818, 29775, 4188, 9770, 115, 2321, 5567, 3071, 3717, 3937, 408, 650, 4616, 3656…
GO:0016102	diterpenoid biosynthetic process	GOBP	8	yes	0.445847	1.56181	0.00171262	0.0139723	up	220, 8644, 10170, 8854, 64577
GO:0046030	inositol trisphosphate phosphatase activity	GOMF	16	yes	-0.272096	0.761781	0.00112306	0.0140436	down	3628, 3635, 3631, 3632, 27124
GO:0090023	positive regulation of neutrophil chemotaxis	GOBP	21	yes	-0.22296	0.800147	0.0017362	0.0141289	down	972, 5880, 6363, 3071, 1236, 57118, 51561, 3579, 6375
GO:0033290	eukaryotic 48S preinitiation complex	GOCC	13	yes	0.375546	1.45579	0.00256454	0.0142652	up	8662, 8668, 10480, 1965, 8669
GO:0043552	positive regulation of phosphatidylinositol 3-kinase activity	GOBP	30	yes	-0.203932	0.815518	0.00176058	0.0142881	down	5747, 7410, 6363, 2321, 5156, 22863, 3667, 3815, 1236, 2247, 2268, 2322, 2046
GO:0002700	regulation of production of molecular mediator of immune response	GOBP	98	yes	-0.145546	0.86455	0.00176105	0.0142881	down	972, 7009, 7186, 5585, 9466, 51237, 8764, 958, 3718, 8915, 54440, 11213, 51010, 2150, 5650, 90865, 118460, 50943, 7292, 10225, 948, 695, 25818, 3569, 940, 3077, 7293, 23529, 200558, 6504, 7124, 117854, 30009, 2867, 959, 10666, 6375, 5950
GO:0031124	mRNA 3'-end processing	GOBP	96	yes	0.210222	1.23395	0.00176243	0.0142881	up	9775, 22916, 9939, 8683, 10189, 9785, 53981, 1025, 4686, 81608, 1478, 10898, 123169, 8106, 134353
GO:0044241	lipid digestion	GOBP	9	yes	0.432684	1.54139	0.00177165	0.0143448	up	3949, 1645, 1056, 200879, 64788, 948
GO:1900034	regulation of cellular response to heat	GOBP	73	yes	0.219284	1.24518	0.00178955	0.0144673	up	3320, 10728, 2288, 9531, 2932, 573, 3281, 9688, 9529, 79902, 817, 472, 27000, 79023, 23411, 26973, 816, 3305
GO:0072525	pyridine-containing compound biosynthetic process	GOBP	20	yes	0.372572	1.45146	0.00179265	0.0144673	up	10135, 4860, 55191, 55163, 8942, 4199, 23498, 23475
GO:0050728	negative regulation of inflammatory response	GOBP	81	yes	-0.148965	0.861599	0.00179352	0.0144673	down	2950, 9314, 5176, 7850, 7132, 53833, 7128, 29, 9021, 4790, 2113, 5467, 7133, 284207, 27342, 7301, 6693, 4907, 4856, 5734, 50943, 27293, 3559, 79626, 3670, 5468, 1524, 116379, 1139, 1269, 51738
GO:0031398	positive regulation of protein ubiquitination	GOBP	176	yes	0.154618	1.16721	0.00180195	0.0144879	up	5708, 330, 29979, 5700, 7332, 10197, 5747, 5707, 5686, 23028, 5713, 5717, 7334, 5347, 1025, 51529, 54602, 7324, 59343, 5718, 5716, 148022, 54165, 29882, 8915, 201254, 408, 4092, 84259, 7965, 91947, 123879, 26191, 144165, 85453, 1950
GO:0061615	glycolytic process through fructose-6-phosphate	GOBP	23	yes	0.335008	1.39795	0.00180283	0.0144879	up	2597, 226, 7167, 5230, 5223, 3099, 5214, 5209, 2026, 5208, 5210
GO:0061620	glycolytic process through glucose-6-phosphate	GOBP	23	yes	0.335008	1.39795	0.00180283	0.0144879	up	2597, 226, 7167, 5230, 5223, 3099, 5214, 5209, 2026, 5208, 5210
GO:0048167	regulation of synaptic plasticity	GOBP	122	yes	-0.132543	0.875866	0.00181139	0.0145385	down	375, 7532, 10755, 4915, 8766, 27020, 3265, 4204, 5764, 10769, 6844, 29882, 6812, 23154, 6809, 793, 3815, 2903, 23373, 9066, 11178, 6770, 6285, 4684, 22941, 6543, 816, 6616, 6900, 152330, 1524, 3766, 491, 23237, 1812, 7101, 54413, 25769, 81832
GO:0022604	regulation of cell morphogenesis	GOBP	437	yes	-0.0810873	0.922113	0.00181627	0.0145596	down	226, 301, 4070, 1072, 6281, 396, 9368, 23580, 5361, 2017, 3383, 57142, 4915, 8766, 56882, 23603, 11135, 6091, 5747, 1523, 10611, 1382, 1739, 2932, 3689, 11151, 2011, 157922, 10439, 6696, 1808, 3611, 1942, 10494, 5604, 64422, 54751, 10630, 54434, 4804, 56990, 2049, 29904, 2768, 9423, 54910, 1954, 7456, 5764, 54961, 1436, 55785, 91010, 8829, 51177, 23189, 752, 57556, 57580, 29882, 4628, 9037, 30011…
hsa05222	Small cell lung cancer	KEGG	84	yes	-0.142123	0.867515	0.00218571	0.0146169	down	3655, 330, 3911, 4792, 3685, 54205, 4609, 207, 7157, 5747, 1163, 4790, 7186, 1027, 8503, 5295, 596, 1021, 7185, 5293, 10000, 1286, 898, 5294, 1288
GO:0005104	fibroblast growth factor receptor binding	GOMF	14	yes	-0.260667	0.770537	0.00118083	0.0146267	down	27020, 10818, 2247, 2246, 23767, 10817, 9365
GO:0006825	copper ion transport	GOBP	29	yes	0.354295	1.42517	0.00183974	0.0147294	up	2288, 1317, 4891, 10063, 79689
GO:0006700	C21-steroid hormone biosynthetic process	GOBP	18	yes	-0.234926	0.79063	0.00184622	0.0147629	down	2232, 650, 6770, 1583
GO:0043406	positive regulation of MAP kinase activity	GOBP	210	yes	-0.108713	0.896988	0.00186162	0.0148491	down	972, 6464, 1849, 7852, 7186, 3611, 200958, 5058, 1942, 57216, 5604, 7161, 11235, 5585, 4254, 3265, 1848, 5606, 101, 6363, 7164, 7867, 958, 10454, 10818, 4188, 2321, 408, 650, 3656, 7984, 3815, 11184, 4294, 2247, 9294, 8654, 8325, 10333, 2246, 727, 6283, 5294, 7124, 2205, 146850, 54106, 8600, 1139, 959, 2322, 1950, 4908, 2914, 5063, 3357, 51738, 255324
GO:0072171	mesonephric tubule morphogenesis	GOBP	60	yes	-0.169744	0.843881	0.0018865	0.0150104	down	4070, 3911, 4609, 1739, 3611, 4089, 596, 2719, 650, 51804, 5727, 2247, 2246, 30812, 2138, 3207, 7475
GO:0033627	cell adhesion mediated by integrin	GOBP	58	yes	-0.170729	0.84305	0.0018922	0.0150371	down	3655, 3685, 3383, 5747, 1307, 6352, 1942, 5420, 1545, 83706, 3071, 9404, 4856, 7535, 5979, 5294, 54997, 2303, 2046
GO:0016137	glycoside metabolic process	GOBP	13	yes	0.392874	1.48123	0.00190044	0.0150668	up	2519, 1646, 1645, 8644
GO:1901661	quinone metabolic process	GOBP	45	yes	0.317444	1.37361	0.00190357	0.0150668	up	57017, 1646, 1645, 8644, 51805, 154807, 23590
GO:0032732	positive regulation of interleukin-1 production	GOBP	36	yes	-0.195679	0.822276	0.00190529	0.0150668	down	3428, 3065, 3965, 6364, 79792, 6363, 29108, 22861, 3717, 22900, 3670, 260434
GO:0051168	nuclear export	GOBP	225	yes	0.14927	1.16099	0.00193481	0.0152654	up	2810, 3429, 5901, 7295, 10541, 7157, 4193, 84248, 9775, 2932, 7979, 22916, 9939, 23214, 5902, 8683, 10189, 55341, 5310, 65083, 1977, 9785, 53981, 10204, 9688, 51068, 4686, 79902, 55677, 80824, 81608, 55308, 84946, 79023, 8106, 8536, 10411, 64901, 202151
GO:0001782	B cell homeostasis	GOBP	24	yes	-0.213826	0.807489	0.00193515	0.0152654	down	972, 3091, 7128, 5585, 10018, 596, 8915, 3071, 50943, 10673, 23495, 115650
GO:0002320	lymphoid progenitor cell differentiation	GOBP	17	yes	-0.234128	0.79126	0.00197303	0.0155262	down	596, 6688, 3815, 3981, 10538, 2322
GO:0097305	response to alcohol	GOBP	124	yes	-0.127338	0.880436	0.00198766	0.0156222	down	3728, 2950, 999, 6774, 3383, 9314, 7412, 2806, 3157, 7082, 70, 1728, 1978, 19, 1536, 94241, 7298, 2534, 6688, 5888, 1234, 10365, 939, 2903, 1571, 5727, 6770, 4880, 761, 1440, 3779, 3359, 2796, 1268, 23209, 1139, 2822, 5950, 1621, 57578
GO:0007512	adult heart development	GOBP	9	yes	0.419136	1.52065	0.001998	0.0156843	up	2697, 4625, 4628, 55636
GO:2000021	regulation of ion homeostasis	GOBP	196	yes	-0.11834	0.888394	0.0020106	0.015764	down	801, 4283, 2697, 11151, 9446, 5788, 65268, 760, 920, 6363, 596, 817, 6717, 1756, 4644, 10345, 55636, 4092, 3932, 3708, 1193, 1234, 9001, 1236, 9472, 2247, 845, 6263, 10962, 239, 6546, 930, 5587, 623, 65266, 8989, 55800, 1812, 6375, 3357, 10021, 8913
GO:0098657	import into cell	GOBP	59	yes	-0.171048	0.842781	0.00202427	0.0158433	down	1317, 6542, 79689, 7018, 3676, 9899, 486, 9900, 84679, 3077, 55503, 6616, 389015, 3766, 1812, 6532
GO:0030852	regulation of granulocyte differentiation	GOBP	14	yes	-0.250278	0.778585	0.00202563	0.0158433	down	10221, 3635, 140685, 54997
GO:0005126	cytokine receptor binding	GOMF	265	yes	-0.112344	0.893737	0.00130159	0.0159682	down	6774, 64114, 4283, 2885, 3572, 8837, 1893, 6464, 51752, 7297, 6386, 6364, 6352, 7205, 7186, 10572, 4254, 5295, 27018, 9958, 6363, 1435, 29108, 3977, 7185, 10818, 3717, 650, 4050, 29097, 4092, 3570, 56300, 9518, 1946, 1672, 7100, 7292, 3600, 8835, 83891, 10673, 9966, 727, 3569, 3594, 51561, 9244, 23529, 970, 3625, 1440, 7124, 4091, 3574, 944, 729230, 10148, 356, 6357, 1896, 54106, 8740, 627, 4049,…
GO:0005085	guanyl-nucleotide exchange factor activity	GOMF	333	yes	-0.0986277	0.90608	0.00131346	0.0159682	down	801, 2885, 5747, 6712, 6464, 29, 5900, 2889, 3561, 88, 4690, 10564, 7410, 9322, 55004, 4254, 26130, 2263, 5906, 1967, 9922, 23048, 23258, 55785, 57449, 57572, 817, 54869, 50649, 1439, 3560, 1839, 57580, 259173, 54874, 3718, 10818, 81704, 23263, 23268, 3717, 2534, 22898, 4747, 5156, 1794, 8891, 27342, 3667, 55619, 7984, 55701, 221178, 27128, 9459, 79958, 3815, 163259, 10044, 153020, 2903, 27040, 9…
GO:0019058	viral life cycle	GOBP	476	yes	0.0967202	1.10155	0.0020601	0.0160933	up	1508, 5034, 6152, 6165, 11224, 50848, 7879, 3428, 5901, 4057, 8662, 3685, 10318, 3065, 3383, 5886, 3949, 6317, 5479, 3838, 3840, 81607, 5861, 5045, 5119, 5359, 3836, 81603, 57132, 7852, 9525, 27243, 3965, 6352, 10189, 4938, 1604, 6575, 6732, 27183, 51510, 10572, 1025, 920, 1488, 9688, 51534, 5437, 91782, 8812, 79902, 4774, 5432, 3839, 7113, 5817, 596, 8764, 8692, 25978, 8411, 5610, 558, 6733, 576…
GO:0050718	positive regulation of interleukin-1 beta secretion	GOBP	19	yes	-0.226871	0.797024	0.00206702	0.0161278	down	3965, 79792, 6363, 29108, 22861, 22900, 260434
GO:0042470	melanosome	GOCC	97	yes	0.183478	1.20139	0.00294178	0.0161395	up	1508, 7534, 3320, 5034, 10457, 5052, 6184, 483, 4323, 2923, 7879, 7529, 5901, 2194, 311, 6520, 5479, 5176, 5861, 5878, 6386, 309, 6509, 4644, 6809, 23682, 1497, 51393, 4948, 64284
GO:0048770	pigment granule	GOCC	97	yes	0.183478	1.20139	0.00294178	0.0161395	up	1508, 7534, 3320, 5034, 10457, 5052, 6184, 483, 4323, 2923, 7879, 7529, 5901, 2194, 311, 6520, 5479, 5176, 5861, 5878, 6386, 309, 6509, 4644, 6809, 23682, 1497, 51393, 4948, 64284
GO:0003724	RNA helicase activity	GOMF	75	yes	0.238758	1.26967	0.00134387	0.0161881	up	9775, 79039, 54606, 9785, 55661, 170506, 6499, 55760, 55308, 11056, 55794, 55510, 92797
hsa05140	Leishmaniasis	KEGG	56	yes	-0.16038	0.85182	0.00250337	0.0162339	down	4792, 3459, 65108, 3460, 3689, 4790, 5603, 10454, 3717, 7097, 3684, 4689, 5579, 3676, 653361, 7124, 3592, 2215
GO:0000272	polysaccharide catabolic process	GOBP	30	yes	0.319441	1.37636	0.00208812	0.0162727	up	5500, 801, 5836, 5257, 2992, 5255
GO:1902622	regulation of neutrophil migration	GOBP	27	yes	-0.206075	0.813772	0.00209239	0.0162863	down	972, 5880, 101, 6363, 3071, 1236, 57118, 51561, 3579, 6375
GO:0001910	regulation of leukocyte mediated cytotoxicity	GOBP	47	yes	-0.180971	0.83446	0.00213705	0.0166031	down	3383, 3965, 5788, 6318, 5817, 2150, 3902, 7409, 114836, 3575, 3594, 4068, 51561, 56253, 146850, 26228, 10666, 259197, 3592, 6375
GO:0019843	rRNA binding	GOMF	57	yes	0.247673	1.28104	0.00139334	0.0166314	up	51081, 64960, 51119, 55052, 84678, 10436, 54948, 92856, 27042, 60493, 55794
GO:0033523	histone H2B ubiquitination	GOBP	13	yes	0.407478	1.50302	0.00216877	0.0168198	up	1025, 7324, 123169, 9025
GO:0048305	immunoglobulin secretion	GOBP	17	yes	-0.23295	0.792193	0.00217378	0.0168383	down	7009, 7186, 958, 90865, 7292, 5452, 10673, 3569, 54900, 7293, 7124, 959, 5950
GO:0031329	regulation of cellular catabolic process	GOBP	374	yes	0.105995	1.11182	0.00219181	0.0169575	up	5708, 5500, 5223, 10134, 6613, 5887, 10755, 5886, 1075, 29979, 678, 3091, 207, 7832, 5700, 5045, 4193, 10197, 5747, 8078, 5707, 7128, 25897, 5686, 6386, 2932, 127544, 5713, 9517, 10221, 9709, 5717, 55905, 5310, 9683, 10558, 93974, 51667, 7133, 29763, 5347, 369, 25820, 51529, 2768, 1855, 7324, 28951, 9529, 101, 5718, 10769, 5716, 64326, 51377, 29882, 83752, 51099, 81892, 55270, 51684, 3667, 4092, …
GO:0002715	regulation of natural killer cell mediated immunity	GOBP	30	yes	-0.205452	0.814279	0.00220709	0.0170552	down	3965, 6318, 5817, 3902, 7409, 10225, 114836, 4068, 56253, 146850, 10666, 259197, 3592, 117157
GO:0009303	rRNA transcription	GOBP	31	yes	0.314387	1.36942	0.00221314	0.017075	up	4691, 2975, 9328, 2976, 112495, 55506, 51547, 440400, 10849
GO:0016614	oxidoreductase activity, acting on CH-OH group of donors	GOMF	200	yes	0.183266	1.20113	0.00144458	0.0170877	up	1718, 3945, 2194, 4191, 224, 2820, 6652, 1488, 51109, 51144, 8540, 622, 1646, 51181, 127281, 1645, 11112, 8514, 650, 10257, 8644, 4199, 112724, 10202, 154807, 10170, 55349, 3291, 8608, 441282, 121214, 145226, 130752
GO:0001709	cell fate determination	GOBP	32	yes	-0.197434	0.820835	0.00222946	0.0171663	down	4170, 9314, 5396, 28514, 4855, 5727, 2624, 3670, 2627, 5629, 57453, 55079
GO:0045116	protein neddylation	GOBP	16	yes	0.38939	1.47608	0.00224714	0.0172818	up	9616, 54165, 8883, 84259, 123879
GO:0072028	nephron morphogenesis	GOBP	71	yes	-0.157919	0.853919	0.00226642	0.0173844	down	4070, 3911, 4609, 1739, 5310, 3611, 4089, 596, 2719, 650, 51804, 5727, 2247, 54806, 2246, 30812, 65266, 2138, 3207, 7475
GO:0090169	regulation of spindle assembly	GOBP	13	yes	0.38152	1.46451	0.00226859	0.0173844	up	5119, 57132, 9525, 27243, 51510, 5347, 25978
GO:0090224	regulation of spindle organization	GOBP	13	yes	0.38152	1.46451	0.00226859	0.0173844	up	5119, 57132, 9525, 27243, 51510, 5347, 25978
GO:0019835	cytolysis	GOBP	25	yes	-0.214345	0.80707	0.00228733	0.0175072	down	4069, 79792, 3251, 5551, 3001, 23531, 727, 730, 2999, 733, 3004, 2822
GO:0090383	phagosome acidification	GOBP	25	yes	0.317502	1.37369	0.00229505	0.0175454	up	7879, 523, 533, 9550, 9114, 51382, 51606, 23682, 245973, 525, 54734
GO:0043011	myeloid dendritic cell differentiation	GOBP	17	yes	-0.232239	0.792757	0.00230321	0.0175869	down	10537, 4055, 3516, 5971, 6688, 3662, 10202, 10538
GO:0021700	developmental maturation	GOBP	197	yes	-0.105856	0.899554	0.0023096	0.0176005	down	4057, 2697, 3091, 4976, 2932, 23028, 3516, 84283, 4204, 6363, 4774, 2309, 3398, 4929, 596, 29882, 7298, 558, 6812, 1203, 650, 23682, 4897, 26047, 9985, 388552, 1672, 10365, 8851, 5452, 3600, 54345, 2069, 10481, 23114, 201164, 695, 30812, 6663, 1235, 5979, 4880, 2624, 8854, 7480, 5468, 816, 6900, 5991, 9378, 30819, 51083, 23544, 162466, 2046, 168620, 79820, 5354
GO:0008542	visual learning	GOBP	38	yes	-0.185609	0.830598	0.00231046	0.0176005	down	3091, 27020, 8704, 4204, 23259, 3815, 1497, 2903, 1812, 54413, 1621, 81832
GO:0001755	neural crest cell migration	GOBP	49	yes	-0.176306	0.838361	0.00231853	0.0176411	down	3911, 23603, 3091, 4254, 54910, 8829, 57556, 9037, 5308, 30812, 58495, 6663, 5979, 223117, 3670, 57715, 9723, 3357, 2066
GO:0004089	carbonate dehydratase activity	GOMF	7	yes	0.460143	1.5843	0.00151876	0.0178047	up	771, 760, 761
GO:0002200	somatic diversification of immune receptors	GOBP	69	yes	-0.162633	0.849903	0.00235254	0.0178754	down	9466, 958, 472, 6932, 51010, 9025, 118460, 50943, 7292, 3981, 10538, 1235, 940, 23529, 200558, 30009, 959, 57379
GO:0006735	NADH regeneration	GOBP	21	yes	0.334017	1.39657	0.00236582	0.0178952	up	2597, 226, 7167, 5230, 5223, 3099, 5214, 5209, 2026, 5208, 5210
GO:0061621	canonical glycolysis	GOBP	21	yes	0.334017	1.39657	0.00236582	0.0178952	up	2597, 226, 7167, 5230, 5223, 3099, 5214, 5209, 2026, 5208, 5210
GO:0061718	glucose catabolic process to pyruvate	GOBP	21	yes	0.334017	1.39657	0.00236582	0.0178952	up	2597, 226, 7167, 5230, 5223, 3099, 5214, 5209, 2026, 5208, 5210
GO:0045741	positive regulation of epidermal growth factor-activated receptor activity	GOBP	12	yes	0.405436	1.49996	0.00238847	0.0180453	up	2069, 1950, 255324
GO:0051208	sequestering of calcium ion	GOBP	128	yes	-0.139745	0.86958	0.00239624	0.0180827	down	801, 4283, 11151, 9446, 5788, 6363, 817, 6717, 1756, 4644, 10345, 55636, 3932, 3708, 1193, 1234, 9001, 1236, 9472, 2247, 845, 6263, 6546, 930, 5587, 623, 8989, 1812, 6375, 3357
GO:0051082	unfolded protein binding	GOMF	96	yes	0.20172	1.2235	0.00155856	0.0181096	up	3320, 10383, 6892, 10728, 7203, 3998, 908, 6950, 10694, 11140, 5479, 51726, 3336, 10294, 5202, 55466, 10845, 80273, 25822, 51103, 1047, 91147, 3305, 135295
GO:0070993	translation preinitiation complex	GOCC	14	yes	0.362705	1.43721	0.00333671	0.0181816	up	8662, 8668, 10480, 1965, 8669
GO:1901618	organic hydroxy compound transmembrane transporter activity	GOMF	28	yes	0.345078	1.4121	0.00159811	0.0184064	up	360, 8273, 11309, 362, 345274, 201780, 366, 28234, 6532, 6530
GO:0002701	negative regulation of production of molecular mediator of immune response	GOBP	27	yes	-0.208594	0.811725	0.00246425	0.0185541	down	7009, 3718, 11213, 90865, 50943, 10225, 3077, 6504, 7124, 6375
GO:0010955	negative regulation of protein processing	GOBP	28	yes	-0.208444	0.811847	0.00249523	0.0187419	down	330, 7850, 4193, 1604, 5345, 23409
GO:1903318	negative regulation of protein maturation	GOBP	28	yes	-0.208444	0.811847	0.00249523	0.0187419	down	330, 7850, 4193, 1604, 5345, 23409
hsa04960	Aldosterone-regulated sodium reabsorption	KEGG	36	yes	-0.181191	0.834276	0.00297981	0.0187553	down	2810, 483, 6337, 8503, 5295, 6338, 5293, 3667, 6340, 5579, 4306, 3291, 486, 5294, 5582
GO:0050433	regulation of catecholamine secretion	GOBP	26	yes	-0.21323	0.80797	0.00250895	0.018823	down	5021, 1268, 1139, 3737, 8973, 1137, 64805
GO:0033176	proton-transporting V-type ATPase complex	GOCC	30	yes	0.322233	1.38021	0.00349635	0.0189228	up	523, 533, 9550, 9114, 51382, 51606, 245973, 525
GO:0050892	intestinal absorption	GOBP	20	yes	0.342103	1.40791	0.00256698	0.0192007	up	50848, 3949, 9414, 1645, 1056, 948
GO:0006997	nucleus organization	GOBP	139	yes	0.171647	1.18726	0.00257096	0.0192007	up	57142, 8815, 5119, 23353, 55968, 80346, 57132, 9525, 27243, 23760, 23481, 2113, 6732, 27183, 51510, 163590, 5347, 10204, 9688, 91782, 79902, 221035, 25978, 6733, 55726, 137886, 23175, 7443, 79023, 165324, 10208, 5579
GO:0051962	positive regulation of nervous system development	GOBP	376	yes	-0.08337	0.920011	0.00259903	0.0193727	down	1981, 375, 396, 6692, 55754, 3065, 4915, 8766, 3091, 5176, 3572, 6091, 6249, 1523, 4976, 1382, 27020, 5597, 1809, 2932, 23028, 2889, 7852, 2011, 3611, 4690, 23405, 54606, 10494, 5604, 7161, 9139, 4804, 2049, 29904, 9423, 8650, 1855, 1954, 4204, 5906, 5764, 60436, 1435, 3398, 8829, 596, 57556, 29882, 9037, 22902, 84298, 2534, 4747, 650, 7097, 5753, 90527, 4897, 3815, 1946, 9001, 8437, 23373, 6935,…
GO:0043405	regulation of MAP kinase activity	GOBP	338	yes	-0.0899132	0.914011	0.00260028	0.0193727	down	972, 2950, 6317, 6464, 1849, 9146, 2889, 7852, 10221, 6653, 7186, 3611, 200958, 5058, 1942, 57216, 5604, 9175, 7161, 11235, 5585, 4254, 3265, 1848, 28951, 5606, 5906, 101, 6363, 80824, 9020, 7164, 4214, 8692, 7867, 958, 5610, 10454, 10818, 4188, 2321, 3717, 1846, 408, 5795, 650, 56940, 5997, 4616, 3656, 11213, 7984, 3815, 1326, 11184, 4294, 51562, 2247, 9294, 8654, 8325, 10333, 2246, 727, 11314, …
GO:0032813	tumor necrosis factor receptor superfamily binding	GOMF	52	yes	-0.184608	0.83143	0.00169916	0.0194	down	64114, 8837, 7186, 10572, 27018, 7185, 4050, 7292, 10673, 9966, 970, 7124, 944, 356, 1896, 8740, 4049, 8600, 959, 8995
GO:0050852	T cell receptor signaling pathway	GOBP	167	yes	-0.116281	0.890225	0.00269614	0.0200636	down	5708, 4792, 5700, 10197, 5707, 5686, 5713, 4790, 5717, 7334, 4690, 5058, 9564, 5788, 920, 5295, 3265, 5718, 5716, 3635, 23180, 2533, 916, 11119, 5293, 8915, 2534, 3937, 5142, 5795, 56940, 3932, 54923, 915, 7454, 1236, 27040, 50943, 7535, 919, 3702, 11314, 26191, 940, 917, 53347, 387357, 9402, 50852, 5063, 7294, 778
GO:0004713	protein tyrosine kinase activity	GOMF	250	yes	-0.120093	0.886838	0.00178562	0.0202114	down	3320, 4915, 11140, 5747, 1523, 7297, 27020, 5604, 10188, 2049, 2263, 5606, 4233, 6776, 1436, 8829, 1439, 1839, 3718, 5610, 558, 11064, 2051, 91461, 3055, 1198, 8805, 2321, 3717, 2534, 5156, 9149, 5753, 3932, 7301, 3815, 57396, 10461, 7535, 2247, 2268, 2246, 3702, 2069, 695, 5979, 2047, 2045, 640, 284656, 4919, 2322, 145957, 1950, 7294, 2066, 2046
GO:0031503	protein complex localization	GOBP	113	yes	-0.131647	0.876651	0.00272644	0.0202657	down	5052, 7127, 2288, 4792, 9516, 5108, 27020, 1739, 3965, 56892, 7205, 5899, 6363, 5716, 117178, 403, 54468, 7097, 4092, 9742, 939, 79809, 4856, 57728, 11020, 57539, 91828, 8809, 51561, 29091, 79989, 166379, 7124, 51284, 10913, 1896, 54106, 199223, 8740, 1740, 81832
GO:0033687	osteoblast proliferation	GOBP	22	yes	-0.214772	0.806725	0.00273552	0.0202964	down	4057, 3685, 2263, 596, 5610, 650, 30812
GO:0046006	regulation of activated T cell proliferation	GOBP	31	yes	-0.195027	0.822812	0.00273688	0.0202964	down	3965, 29108, 23308, 10385, 50943, 7292, 3559, 3594, 51561, 6504, 11148
GO:0042698	ovulation cycle	GOBP	84	yes	-0.143421	0.86639	0.0027488	0.0203601	down	301, 4323, 3383, 5176, 2113, 5066, 4089, 1051, 4254, 5764, 2309, 596, 558, 9510, 5156, 408, 23411, 7301, 6586, 4327, 3815, 2099, 2069, 6092, 3625, 658, 5021, 2796, 1139, 4987, 89766, 4808
GO:0001975	response to amphetamine	GOBP	24	yes	-0.209423	0.811052	0.00279688	0.0206462	down	801, 3065, 3383, 1808, 4929, 3251, 2903, 5021, 1812, 1269, 1621
GO:0043462	regulation of ATPase activity	GOBP	55	yes	0.242105	1.27393	0.00282356	0.0208193	up	483, 4057, 51726, 5359, 10105, 10598, 5217, 93974, 54431, 163590, 203547, 27000, 7134, 6588, 4634, 7139, 54106, 9024, 7137
GO:0032660	regulation of interleukin-17 production	GOBP	19	yes	-0.226184	0.797571	0.00283914	0.0209102	down	3071, 50943, 7292, 3600, 114836, 51561, 4063, 3592
GO:0031597	cytosolic proteasome complex	GOCC	12	yes	0.373831	1.45329	0.00393754	0.0210264	up	5708, 5700, 5707, 51377
GO:0033764	steroid dehydrogenase activity, acting on the CH-OH group of donors, NAD or NADP as acceptor	GOMF	30	yes	0.341749	1.40741	0.00189022	0.0210731	up	51144, 1645, 8644, 10170, 3291, 441282
GO:0004908	interleukin-1 receptor activity	GOMF	9	yes	-0.306437	0.736065	0.00189385	0.0210731	down	7850, 8809, 8808
GO:0090022	regulation of neutrophil chemotaxis	GOBP	24	yes	-0.209044	0.81136	0.00288427	0.0211699	down	972, 5880, 6363, 3071, 1236, 57118, 51561, 3579, 6375
GO:0050716	positive regulation of interleukin-1 secretion	GOBP	23	yes	-0.216785	0.805103	0.00289806	0.0212228	down	3965, 79792, 6363, 29108, 22861, 22900, 260434
GO:0010623	programmed cell death involved in cell development	GOBP	11	yes	-0.255926	0.774199	0.00293606	0.0214522	down	4254, 596, 3815, 356
GO:0014031	mesenchymal cell development	GOBP	71	yes	-0.1543	0.857015	0.00294854	0.021519	down	3911, 23603, 3091, 4254, 54910, 8829, 596, 57556, 9037, 5308, 30812, 58495, 6663, 5979, 8854, 223117, 3670, 57715, 2303, 9723, 3357, 2066
GO:0006405	RNA export from nucleus	GOBP	152	yes	0.17625	1.19274	0.00296335	0.0216026	up	5901, 84248, 9775, 7979, 22916, 9939, 5902, 8683, 10189, 65083, 1977, 9785, 53981, 9688, 4686, 79902, 55677, 81608, 55308, 79023, 8106
GO:0016447	somatic recombination of immunoglobulin gene segments	GOBP	47	yes	-0.178491	0.836531	0.00298339	0.0217241	down	9466, 958, 51010, 9025, 118460, 50943, 7292, 3981, 10538, 1235, 940, 23529, 200558, 30009, 959, 57379
GO:0005088	Ras guanyl-nucleotide exchange factor activity	GOMF	228	yes	-0.107658	0.897935	0.00197196	0.0217578	down	801, 2885, 5747, 6712, 6464, 29, 2889, 3561, 88, 7410, 4254, 2263, 5906, 23258, 55785, 57449, 817, 54869, 50649, 1439, 3560, 1839, 57580, 259173, 3718, 10818, 23263, 23268, 3717, 2534, 22898, 4747, 5156, 1794, 27342, 3667, 7984, 55701, 221178, 9459, 79958, 3815, 163259, 153020, 2903, 27040, 9649, 7409, 2247, 2906, 2246, 3559, 25791, 8997, 2069, 4684, 25780, 10411, 221002, 5979, 9048, 10817, 816, …
GO:0002221	pattern recognition receptor signaling pathway	GOBP	184	yes	-0.117396	0.889233	0.00299849	0.0217773	down	1508, 330, 4057, 4792, 10318, 29979, 3659, 7128, 5641, 3689, 7334, 4214, 148022, 7867, 23180, 10454, 8915, 7097, 3656, 3684, 11213, 92747, 7301, 2150, 2099, 7100, 3662, 27293, 7096, 81035, 10333, 948, 695, 26191, 1755, 81793, 4064, 51284, 57115, 23098, 54106, 2867, 353376
GO:0000154	rRNA modification	GOBP	39	yes	0.29395	1.34172	0.00300009	0.0217773	up	1736, 55651, 114049, 55226, 4839, 55505, 79066, 10436, 51093, 63899
GO:0046834	lipid phosphorylation	GOBP	94	yes	-0.136415	0.87248	0.00300085	0.0217773	down	2885, 8525, 3628, 79837, 4254, 5295, 8396, 2263, 8394, 1839, 200576, 10380, 10818, 5293, 5305, 2534, 84668, 5156, 3667, 3932, 3815, 7409, 2247, 2246, 145567, 2069, 930, 940, 5294, 50852, 9365, 146850, 941, 5288, 145957, 1950, 2066
GO:0051952	regulation of amine transport	GOBP	42	yes	-0.184007	0.83193	0.00301246	0.021837	down	10550, 5021, 1268, 1139, 3737, 1812, 8973, 1137, 64805
GO:0071396	cellular response to lipid	GOBP	478	yes	-0.0760039	0.926813	0.00305161	0.0220959	down	301, 2950, 5901, 2288, 4057, 4792, 9516, 3065, 3383, 11331, 9314, 3949, 678, 5176, 207, 7332, 3157, 7128, 4790, 10221, 6364, 5292, 114907, 6352, 79039, 1604, 5187, 5058, 5467, 7133, 1051, 5764, 19, 8463, 7182, 2309, 29108, 148022, 4929, 2770, 29079, 1021, 11240, 958, 8896, 112, 79876, 687, 8324, 558, 29966, 59307, 3055, 8805, 7026, 3717, 5142, 164091, 9325, 7097, 3656, 57088, 3394, 5753, 8644, 81…
GO:0046112	nucleobase biosynthetic process	GOBP	20	yes	0.355034	1.42623	0.00306263	0.0221508	up	8833, 353, 7372, 51816, 3251, 1723
GO:0045724	positive regulation of cilium assembly	GOBP	13	yes	-0.244932	0.782758	0.00306921	0.0221734	down	153241, 55835, 9662, 9001, 80199, 79734, 55329
GO:0002204	somatic recombination of immunoglobulin genes involved in immune response	GOBP	43	yes	-0.182213	0.833424	0.00309618	0.0222932	down	9466, 958, 51010, 9025, 118460, 50943, 7292, 3981, 10538, 1235, 940, 23529, 200558, 30009, 959, 57379
GO:0002208	somatic diversification of immunoglobulins involved in immune response	GOBP	43	yes	-0.182213	0.833424	0.00309618	0.0222932	down	9466, 958, 51010, 9025, 118460, 50943, 7292, 3981, 10538, 1235, 940, 23529, 200558, 30009, 959, 57379
GO:0045190	isotype switching	GOBP	43	yes	-0.182213	0.833424	0.00309618	0.0222932	down	9466, 958, 51010, 9025, 118460, 50943, 7292, 3981, 10538, 1235, 940, 23529, 200558, 30009, 959, 57379
GO:0044438	microbody part	GOCC	106	yes	0.1918	1.21143	0.00423917	0.0223393	up	375, 224, 6342, 2181, 2180, 8540, 83752, 50640, 4257, 9409, 390916, 9066, 5191, 8800, 1428, 23305, 225, 255027
GO:0044439	peroxisomal part	GOCC	106	yes	0.1918	1.21143	0.00423917	0.0223393	up	375, 224, 6342, 2181, 2180, 8540, 83752, 50640, 4257, 9409, 390916, 9066, 5191, 8800, 1428, 23305, 225, 255027
GO:0015872	dopamine transport	GOBP	25	yes	-0.215806	0.805892	0.00313184	0.0225053	down	1268, 3737, 1812, 8973, 1137
GO:0035767	endothelial cell chemotaxis	GOBP	23	yes	-0.218674	0.803583	0.00313263	0.0225053	down	4233, 57449, 8829, 9037, 4856, 2247, 2246, 5587
GO:0005070	SH3/SH2 adaptor activity	GOMF	52	yes	-0.174095	0.840217	0.00207181	0.0225206	down	2885, 4690, 23623, 2887, 8935, 8027, 6503, 10044, 27040, 8835, 8506, 84174, 940, 4068, 10750, 9402, 79368, 26228, 2888
GO:0015085	calcium ion transmembrane transporter activity	GOMF	159	yes	-0.142843	0.86689	0.00207539	0.0225206	down	488, 3685, 6520, 5310, 54499, 489, 23258, 57620, 80228, 90550, 3708, 2903, 51393, 782, 9914, 6263, 6546, 55503, 255231, 27092, 6543, 8989, 491, 778, 123041, 9629, 8913, 25769, 2917
GO:0060993	kidney morphogenesis	GOBP	85	yes	-0.144439	0.865508	0.00315105	0.0226124	down	4070, 3911, 4609, 1739, 5310, 3611, 4089, 57216, 596, 2719, 650, 793, 51804, 5727, 2247, 54806, 2246, 30812, 65266, 2138, 51301, 3207, 7475
GO:1903052	positive regulation of proteolysis involved in cellular protein catabolic process	GOBP	173	yes	0.146432	1.1577	0.00316677	0.0226999	up	5708, 10134, 6613, 1075, 29979, 207, 5700, 4193, 10197, 5747, 8078, 5707, 25897, 5686, 2932, 127544, 5713, 10221, 9709, 5717, 55905, 93974, 51667, 5347, 25820, 51529, 1855, 7324, 28951, 5718, 10769, 5716, 64326, 29882, 4092, 1263, 90865, 115992, 90637, 85409, 144165, 54941, 1950
GO:0001504	neurotransmitter uptake	GOBP	26	yes	-0.21283	0.808294	0.00319457	0.0228737	down	9899, 9900, 6616, 3766, 1812, 6532
GO:0032725	positive regulation of granulocyte macrophage colony-stimulating factor production	GOBP	10	yes	-0.260715	0.770501	0.00321345	0.022968	down	51561, 3670, 2205, 54106, 941
GO:0010517	regulation of phospholipase activity	GOBP	50	yes	-0.168027	0.845331	0.00321714	0.022968	down	301, 2769, 6352, 400, 2263, 2321, 5156, 5997, 3815, 2099, 5330, 2247, 3702, 8698, 9290, 7294, 3357
GO:0048708	astrocyte differentiation	GOBP	55	yes	-0.163806	0.848907	0.00323941	0.023092	down	6774, 3572, 4501, 5604, 8613, 3398, 1021, 650, 28514, 6285, 30812, 4613, 23529, 6900, 1812, 7101, 5354
GO:0050710	negative regulation of cytokine secretion	GOBP	35	yes	-0.186179	0.830125	0.00324821	0.0231035	down	301, 7850, 307, 27342, 10385, 2150, 5734, 50943, 7292, 3604, 23208, 26191, 3569, 6504, 7124
GO:1903038	negative regulation of leukocyte cell-cell adhesion	GOBP	87	yes	-0.143464	0.866352	0.00325524	0.0231241	down	972, 301, 9314, 3659, 53833, 3620, 1739, 3965, 1051, 441478, 8764, 3718, 56940, 9306, 6693, 10385, 3902, 201633, 50943, 7292, 26279, 8654, 3559, 11314, 84524, 11326, 79679, 1493, 26191, 3077, 54900, 79626, 2796, 6375, 8995
GO:2000107	negative regulation of leukocyte apoptotic process	GOBP	39	yes	-0.181602	0.833933	0.003259	0.0231241	down	972, 3091, 3620, 6352, 1942, 4254, 6363, 3718, 558, 81704, 8915, 57181, 939, 1236, 10461, 3579
GO:0045088	regulation of innate immune response	GOBP	377	yes	-0.0861215	0.917483	0.00332298	0.0235055	down	1508, 5708, 3428, 330, 4057, 4792, 10318, 11140, 29979, 3659, 3459, 83666, 5700, 10197, 5707, 3460, 7128, 51752, 7297, 340061, 9021, 5359, 5686, 5641, 5713, 3689, 4790, 3965, 6352, 5717, 7334, 5971, 5058, 6318, 3265, 101, 5718, 5716, 4214, 5817, 29108, 148022, 7867, 23180, 11274, 10454, 8915, 3055, 5567, 3717, 2534, 7097, 3385, 3656, 3684, 3455, 11213, 92747, 8651, 7301, 2150, 2099, 7100, 3902, 3…
GO:0002181	cytoplasmic translation	GOBP	55	yes	0.242475	1.2744	0.00332746	0.0235114	up	6165, 7458, 8662, 10480, 25946, 4690, 8669, 1978, 8872, 24140, 80315, 200916, 9001
GO:0033622	integrin activation	GOBP	18	yes	-0.227367	0.796629	0.00337624	0.0238038	down	1307, 54751, 51237, 5341, 83706, 5734, 1015
GO:0030278	regulation of ossification	GOBP	161	yes	-0.112576	0.893529	0.00344368	0.0242262	down	8626, 1192, 4057, 2697, 3091, 3572, 1893, 5747, 1052, 56172, 3516, 3611, 1051, 2263, 4086, 1435, 3398, 596, 1021, 9770, 91461, 51684, 650, 3570, 55589, 92, 4038, 5734, 5727, 6546, 6096, 3569, 4880, 1594, 5587, 5167, 7480, 7124, 4091, 658, 54857, 9365, 162466, 2662, 374
GO:1904896	ESCRT complex disassembly	GOBP	10	yes	0.397286	1.48778	0.0034665	0.0242695	up	5119, 57132, 9525, 27243, 27183, 51510, 51534, 91782, 25978
GO:1904903	ESCRT III complex disassembly	GOBP	10	yes	0.397286	1.48778	0.0034665	0.0242695	up	5119, 57132, 9525, 27243, 27183, 51510, 51534, 91782, 25978
GO:0019362	pyridine nucleotide metabolic process	GOBP	144	yes	0.17966	1.19681	0.00346869	0.0242695	up	2597, 226, 7167, 5230, 6774, 7086, 5223, 3945, 4191, 10135, 3091, 3099, 5214, 9611, 5209, 4860, 2026, 51071, 55191, 51181, 8942, 8514, 5208, 4199, 5210, 23498, 23475, 130752
GO:0046496	nicotinamide nucleotide metabolic process	GOBP	144	yes	0.17966	1.19681	0.00346869	0.0242695	up	2597, 226, 7167, 5230, 6774, 7086, 5223, 3945, 4191, 10135, 3091, 3099, 5214, 9611, 5209, 4860, 2026, 51071, 55191, 51181, 8942, 8514, 5208, 4199, 5210, 23498, 23475, 130752
GO:0006839	mitochondrial transport	GOBP	288	yes	0.119861	1.12734	0.0034767	0.0242798	up	2810, 7534, 3320, 8626, 292, 6774, 7529, 7532, 8655, 518, 3099, 7157, 7332, 4604, 10476, 86, 2932, 9868, 10105, 10452, 9520, 7351, 59286, 8607, 9551, 23788, 93974, 5880, 23593, 7161, 2139, 55486, 23203, 10018, 401505, 100287932, 5366, 10440, 282991, 79778, 596, 79680, 10651, 664, 345778, 80273, 90550, 131118, 55013, 26521, 57380, 5565, 1459, 27165, 4285, 32, 788, 84224, 3305, 84327, 8999, 255027,…
GO:0050795	regulation of behavior	GOBP	33	yes	-0.190336	0.826681	0.00347771	0.0242798	down	6774, 2697, 8863, 7182, 5730, 54806, 3569, 9378, 1268, 3737, 4987, 3357, 51738
GO:0032611	interleukin-1 beta production	GOBP	55	yes	-0.166007	0.84704	0.00349144	0.0243493	down	2950, 3428, 7128, 3965, 79792, 19, 6363, 29108, 22861, 3717, 22900, 2150, 1236, 1903, 10333, 948, 3670, 260434, 1139, 51738
hsa04620	Toll-like receptor signaling pathway	KEGG	86	yes	-0.134591	0.874073	0.00399707	0.0244392	down	4792, 4283, 207, 4790, 5603, 6352, 6696, 5604, 8503, 5295, 5606, 148022, 958, 10454, 5293, 10000, 7097, 3455, 1326, 7100, 7096, 10333, 3569, 5294, 7124, 51284, 54106, 941, 3592, 353376
GO:0006520	cellular amino acid metabolic process	GOBP	388	yes	0.116838	1.12394	0.00351693	0.0245005	up	5708, 8140, 3735, 8833, 2806, 5700, 10197, 5707, 2617, 5686, 4942, 5713, 6611, 2193, 5717, 1728, 833, 5625, 501, 4204, 2744, 6776, 5718, 84706, 6542, 5716, 4507, 10056, 55157, 23564, 80222, 124454, 11112, 5860, 435, 5723, 7965, 2954, 27165, 259307, 89874, 384, 9056, 1497, 9945, 122622, 5805, 2678, 2731, 2571, 1428, 2875, 4143, 2346, 6545, 23409, 635
GO:0042537	benzene-containing compound metabolic process	GOBP	25	yes	-0.226807	0.797074	0.00352254	0.0245131	down	2806, 3620, 8942, 2948, 1580, 1571, 6770, 169355
GO:1990204	oxidoreductase complex	GOCC	140	yes	0.179431	1.19654	0.00468519	0.0245283	up	5034, 6241, 4710, 2820, 4711, 4719, 29796, 1536, 4702, 55967, 50484, 1737, 4731, 4718, 4689, 51103, 124056, 2731, 10811, 653361, 654817, 654816
GO:0046873	metal ion transmembrane transporter activity	GOMF	478	yes	-0.092935	0.911253	0.00232522	0.024593	down	488, 483, 6535, 3685, 6520, 6337, 10723, 84061, 5310, 6575, 9990, 54499, 1317, 81614, 489, 23258, 8273, 4891, 6560, 81894, 57620, 80228, 6338, 90550, 357, 8514, 57380, 348938, 9424, 3708, 57181, 23390, 7018, 10568, 2903, 6340, 51393, 782, 3772, 3749, 9914, 6263, 8645, 486, 6546, 79041, 84679, 29986, 55503, 30818, 6556, 255231, 345274, 3750, 27092, 3786, 6543, 3762, 23416, 388662, 284111, 8989, 54…
GO:0016829	lyase activity	GOMF	191	yes	0.16338	1.17748	0.0023287	0.024593	up	226, 2547, 2194, 771, 262, 5066, 7372, 760, 2026, 80142, 80146, 55862, 51071, 27301, 4597, 112, 23761, 79876, 115, 3052, 435, 2762, 81889, 80324, 7390, 2983, 4199, 5805, 201161, 2731, 8091, 761, 2571, 200558, 5105, 59344, 4056
GO:0005048	signal sequence binding	GOMF	38	yes	0.277438	1.31974	0.00235294	0.024593	up	1173, 4792, 11014, 3838, 3840, 10945, 6730, 3836, 6729, 9670, 3839, 5191, 30819, 402569
GO:0016417	S-acyltransferase activity	GOMF	29	yes	0.304403	1.35582	0.00236615	0.024593	up	2194, 25921, 10652, 51304, 84885, 51114, 1737, 23390, 79844
GO:0017127	cholesterol transporter activity	GOMF	8	yes	-0.292654	0.74628	0.00236778	0.024593	down	19, 6770
GO:0005231	excitatory extracellular ligand-gated ion channel activity	GOMF	42	yes	-0.199399	0.819223	0.00237876	0.024593	down	2568, 2903, 2906, 3359, 1139, 8973, 1137
GO:0042448	progesterone metabolic process	GOBP	10	yes	0.396787	1.48704	0.00354415	0.0246109	up	1646, 1645, 8644, 10170
GO:0001682	tRNA 5'-leader removal	GOBP	10	yes	0.396786	1.48704	0.00354425	0.0246109	up	54913, 10248, 10799
GO:0010893	positive regulation of steroid biosynthetic process	GOBP	14	yes	-0.238388	0.787897	0.00356232	0.0247097	down	5447, 6770, 2246, 7124
GO:0070169	positive regulation of biomineral tissue development	GOBP	34	yes	-0.188286	0.828377	0.00357247	0.0247535	down	4057, 91461, 650, 92, 6546, 7480, 658, 9365, 7475
GO:0051645	Golgi localization	GOBP	13	yes	0.387486	1.47327	0.0035879	0.0248336	up	7534, 9368, 22820, 10494, 11235, 7405
hsa04970	Salivary secretion	KEGG	67	yes	-0.145721	0.864399	0.00419038	0.0249095	down	483, 801, 4069, 727897, 6844, 112, 115, 5567, 3708, 2983, 5330, 5579, 6263, 486, 1755, 55503, 362, 54831, 491, 147, 5582
GO:0021516	dorsal spinal cord development	GOBP	9	yes	-0.265817	0.766579	0.00360463	0.0249227	down	8543, 266727, 89780, 5629, 5081, 644168
GO:0019956	chemokine binding	GOMF	18	yes	-0.23495	0.79061	0.00243709	0.0249992	down	5355, 3685, 1234, 1236, 10663, 3676, 2833, 1235, 1524, 3579, 3577
GO:0005916	fascia adherens	GOCC	9	yes	0.396519	1.48664	0.00482018	0.0250712	up	3728, 1674, 2697, 4892
GO:0032675	regulation of interleukin-6 production	GOBP	99	yes	-0.136395	0.872498	0.00367279	0.0253667	down	7128, 3965, 5603, 1051, 55773, 29108, 148022, 8692, 3635, 3071, 408, 7097, 27342, 11213, 3570, 2150, 90865, 10365, 50943, 7292, 7096, 23208, 10333, 948, 197358, 2069, 26191, 3569, 64170, 3670, 6504, 7124, 51284, 8808, 54106, 1139, 353376, 51738, 3605
GO:0050768	negative regulation of neurogenesis	GOBP	220	yes	-0.10059	0.904304	0.00369508	0.0254933	down	6774, 396, 2288, 57142, 4193, 5108, 5747, 1809, 2932, 6653, 6696, 23405, 1942, 57534, 7161, 1977, 9139, 4804, 9423, 54910, 5764, 9529, 10769, 2309, 3398, 8829, 23189, 57556, 112, 9037, 81559, 22902, 23111, 9706, 23108, 28514, 23105, 4038, 8851, 11202, 25791, 30812, 4613, 89780, 30012, 223117, 3670, 27124, 2045, 6900, 152330, 2258, 26052, 2796, 57715, 7476, 57540, 26228, 7015, 112755, 64843, 54328…
GO:0072009	nephron epithelium development	GOBP	101	yes	-0.135785	0.87303	0.00369929	0.025495	down	4070, 3911, 4609, 1739, 4643, 5310, 3611, 4089, 5420, 9688, 596, 2719, 650, 28514, 793, 51804, 5727, 2247, 54806, 2246, 30812, 65266, 2138, 2303, 3207, 4868, 7475
GO:0005643	nuclear pore	GOCC	89	yes	0.199979	1.22138	0.00494649	0.0255622	up	5901, 3838, 3840, 3836, 10204, 9688, 59343, 79902, 3839, 55308, 79023, 64901, 402569
GO:0006506	GPI anchor biosynthetic process	GOBP	49	yes	0.282961	1.32705	0.00372356	0.0256348	up	54965, 5329, 8818, 80055, 5277, 29880, 284098, 9488, 80157
GO:0070230	positive regulation of lymphocyte apoptotic process	GOBP	17	yes	-0.226025	0.797698	0.00373585	0.0256919	down	7157, 3620, 3965, 6352, 101, 355, 84524, 5133
GO:0051937	catecholamine transport	GOBP	42	yes	-0.185861	0.830389	0.00380023	0.0260359	down	4204, 5021, 1268, 1139, 3737, 1812, 8973, 6530, 1137, 64805
GO:0019359	nicotinamide nucleotide biosynthetic process	GOBP	18	yes	0.370242	1.44808	0.00380028	0.0260359	up	10135, 4860, 55191, 8942, 4199, 23498, 23475
GO:0019363	pyridine nucleotide biosynthetic process	GOBP	18	yes	0.370242	1.44808	0.00380028	0.0260359	up	10135, 4860, 55191, 8942, 4199, 23498, 23475
GO:0046854	phosphatidylinositol phosphorylation	GOBP	83	yes	-0.139964	0.86939	0.00380204	0.0260359	down	2885, 3628, 79837, 4254, 5295, 8396, 2263, 8394, 1839, 200576, 10380, 10818, 5293, 5305, 2534, 84668, 5156, 3667, 3932, 3815, 7409, 2247, 2246, 145567, 2069, 930, 940, 5294, 50852, 9365, 146850, 941, 5288, 145957, 1950, 2066
GO:0032391	photoreceptor connecting cilium	GOCC	26	yes	-0.196577	0.821538	0.00510415	0.0260796	down	403, 51098, 9742, 57728, 755, 84140, 4867, 4117
GO:0031513	nonmotile primary cilium	GOCC	108	yes	-0.128291	0.879597	0.00512827	0.0260796	down	5108, 84747, 4644, 403, 51098, 84662, 79867, 9742, 57728, 755, 10461, 54806, 79600, 27241, 91147, 5158, 80776, 84140, 23035, 79583, 22941, 4867, 1258, 8787, 1812, 10083, 4117, 1259, 778, 57101, 54714
GO:0015629	actin cytoskeleton	GOCC	495	yes	0.0861225	1.08994	0.00519562	0.0260796	up	71, 226, 3728, 1072, 7171, 64855, 7170, 999, 3005, 824, 9368, 23580, 5358, 11034, 2017, 829, 58, 3983, 3936, 4703, 7412, 171024, 23603, 4620, 10552, 6455, 10625, 11135, 9578, 5756, 5747, 4604, 6712, 11073, 10611, 1809, 29766, 5829, 4646, 70, 11151, 2011, 4643, 27295, 88, 3611, 4619, 830, 5880, 5058, 9564, 55971, 57216, 26064, 4606, 54751, 4625, 57403, 81873, 9262, 4660, 7456, 101, 4632, 9743, 500…
GO:0016471	vacuolar proton-transporting V-type ATPase complex	GOCC	17	yes	0.367372	1.44393	0.00519621	0.0260796	up	533, 9550, 9114, 51606, 525
GO:0030686	90S preribosome	GOCC	28	yes	0.292338	1.33956	0.0052094	0.0260796	up	23481, 65083, 10199, 88745, 92856, 55759
GO:0002043	blood vessel endothelial cell proliferation involved in sprouting angiogenesis	GOBP	11	yes	-0.252262	0.777041	0.00383403	0.026227	down	4804, 11235, 441478, 9037, 26051, 168667
GO:0007084	mitotic nuclear envelope reassembly	GOBP	11	yes	0.394865	1.48418	0.00385694	0.0263558	up	8815, 80346, 221035, 7443
GO:0045589	regulation of regulatory T cell differentiation	GOBP	13	yes	-0.241822	0.785196	0.00386128	0.0263574	down	3659, 3965, 50943, 7292, 1493, 940
GO:0033116	endoplasmic reticulum-Golgi intermediate compartment membrane	GOCC	53	yes	0.224325	1.25148	0.00532367	0.0263947	up	10134, 3998, 1075, 10945, 10652, 2801, 1604, 81671, 23423, 203547, 50999, 51290, 51226, 2157, 2153, 374
GO:0016254	preassembly of GPI anchor in ER membrane	GOBP	15	yes	0.356012	1.42762	0.00387705	0.0264029	up	54965, 8818, 5277, 284098, 9488
GO:0031118	rRNA pseudouridine synthesis	GOBP	10	yes	0.479172	1.61474	0.00388316	0.0264029	up	1736, 55651, 55505
GO:0006584	catecholamine metabolic process	GOBP	45	yes	-0.187245	0.829241	0.00388434	0.0264029	down	4128, 4929, 3251, 2903, 3642, 1812, 1621
GO:0009712	catechol-containing compound metabolic process	GOBP	45	yes	-0.187245	0.829241	0.00388434	0.0264029	down	4128, 4929, 3251, 2903, 3642, 1812, 1621
GO:0032781	positive regulation of ATPase activity	GOBP	35	yes	0.275777	1.31755	0.00394726	0.0268022	up	483, 51726, 5359, 10598, 5217, 54431, 163590, 27000, 4634, 7139
GO:0031143	pseudopodium	GOCC	15	yes	0.351231	1.42082	0.00549049	0.0269809	up	824, 57111, 88, 408, 2150
GO:1903322	positive regulation of protein modification by small protein conjugation or removal	GOBP	191	yes	0.136942	1.14676	0.00397964	0.0269936	up	5708, 330, 29979, 5700, 7332, 10197, 5747, 5707, 5686, 23028, 5713, 5717, 7334, 5347, 1025, 51529, 54602, 7324, 59343, 5718, 5716, 148022, 54165, 29882, 8915, 201254, 408, 4092, 84259, 7965, 91947, 23551, 123879, 26191, 144165, 85453, 1950
GO:0042451	purine nucleoside biosynthetic process	GOBP	121	yes	0.196438	1.21706	0.00399936	0.0270703	up	226, 6774, 518, 2987, 8833, 10476, 262, 9061, 9551, 353, 205, 51816, 4507, 3251, 9060, 4907, 122622, 161823, 10861
GO:0046129	purine ribonucleoside biosynthetic process	GOBP	121	yes	0.196438	1.21706	0.00399936	0.0270703	up	226, 6774, 518, 2987, 8833, 10476, 262, 9061, 9551, 353, 205, 51816, 4507, 3251, 9060, 4907, 122622, 161823, 10861
hsa04662	B cell receptor signaling pathway	KEGG	73	yes	-0.140368	0.869038	0.00468197	0.0270795	down	4792, 2885, 207, 2932, 4790, 5880, 7410, 5604, 8503, 5295, 3265, 3635, 973, 5293, 8915, 4794, 10000, 7409, 5579, 974, 933, 1380, 25780, 695, 930, 63928, 5294, 4773
GO:0060712	spongiotrophoblast layer development	GOBP	13	yes	0.376613	1.45734	0.00402	0.0271814	up	207, 9021, 59343, 10761
GO:0007162	negative regulation of cell adhesion	GOBP	205	yes	-0.103291	0.901864	0.0040279	0.0272063	down	972, 301, 4070, 4323, 999, 396, 9314, 8751, 23603, 3659, 397, 5747, 53833, 3620, 1739, 3965, 5788, 5420, 1051, 5295, 23560, 90102, 441478, 6494, 8764, 23189, 9037, 114897, 3718, 8324, 1545, 3717, 650, 56940, 9306, 9404, 6693, 10385, 1946, 3902, 201633, 80139, 50943, 168002, 285, 7292, 27299, 26279, 8654, 3559, 11314, 84524, 53616, 11326, 239, 79679, 1493, 26191, 3077, 54900, 79626, 124872, 2796, …
GO:0002115	store-operated calcium entry	GOBP	9	yes	-0.264128	0.767875	0.00405504	0.0273609	down	57620, 80228, 8832, 9456, 6345
GO:0072524	pyridine-containing compound metabolic process	GOBP	158	yes	0.171499	1.18708	0.0040696	0.0274304	up	2597, 226, 7167, 5230, 6774, 7086, 5223, 3945, 8566, 4191, 10135, 3091, 3099, 5214, 9611, 5209, 4860, 2026, 51071, 55191, 51181, 55163, 8942, 8514, 5208, 4199, 5210, 23498, 23475, 130752
GO:1901861	regulation of muscle tissue development	GOBP	104	yes	-0.132663	0.87576	0.00408526	0.0275071	down	2817, 2697, 3516, 4089, 7161, 2263, 596, 6665, 650, 28514, 51804, 9472, 84466, 2247, 6285, 50937, 6474, 22943, 89780, 2627, 7480, 9099, 23414, 4618, 7472, 2066, 5950
GO:0045191	regulation of isotype switching	GOBP	25	yes	-0.204593	0.814979	0.0040925	0.0275271	down	9466, 958, 51010, 118460, 50943, 7292, 940, 23529, 200558, 30009
GO:0030515	snoRNA binding	GOMF	28	yes	0.305128	1.3568	0.00271133	0.0275967	up	1736, 55651, 55505, 11164, 92856, 27042, 9136, 26747
GO:0001731	formation of translation preinitiation complex	GOBP	20	yes	0.326724	1.38642	0.00410849	0.0275979	up	7458, 8662, 1983, 8668, 10480, 8669
GO:0030150	protein import into mitochondrial matrix	GOBP	15	yes	0.354666	1.4257	0.00411161	0.0275979	up	10452, 100287932, 10440, 80273
GO:0060038	cardiac muscle cell proliferation	GOBP	37	yes	-0.181654	0.83389	0.0041354	0.0277287	down	2697, 3516, 7161, 2263, 4086, 2247, 2627, 23414, 7472, 2303, 2066, 5950
GO:0045121	membrane raft	GOCC	251	yes	-0.0892265	0.914638	0.00568195	0.0277515	down	5230, 114569, 483, 999, 6281, 330, 824, 2817, 3945, 9368, 150696, 3383, 2697, 7851, 23603, 26509, 7132, 2773, 8837, 5045, 5912, 5359, 6386, 1739, 1604, 7186, 7133, 5788, 5420, 55004, 920, 19, 23673, 2770, 8692, 3635, 1756, 973, 200576, 23180, 355, 8915, 3055, 3717, 2534, 3937, 7097, 3667, 3932, 962, 28514, 25999, 1946, 150372, 4038, 27040, 9472, 7535, 5727, 7096, 146760, 10333, 948, 5577, 909, 69…
GO:0016229	steroid dehydrogenase activity	GOMF	35	yes	0.32453	1.38338	0.00277986	0.0280766	up	51144, 1645, 8644, 10170, 3291, 441282
GO:0030031	cell projection assembly	GOBP	366	yes	-0.0826588	0.920665	0.00419578	0.0280814	down	4070, 3320, 3655, 688, 2012, 9368, 3911, 23580, 2017, 3383, 3983, 10787, 23603, 11135, 5108, 1809, 6386, 9114, 5217, 5205, 88, 4690, 10938, 5880, 7410, 57216, 5420, 64422, 54434, 1874, 9423, 3265, 54961, 8394, 51382, 79902, 6363, 55785, 117178, 54869, 50649, 85014, 23189, 55704, 4628, 54874, 29984, 129880, 2014, 642273, 10602, 153241, 10257, 115704, 26051, 221178, 26160, 582, 55835, 79867, 9459, …
GO:0061326	renal tubule development	GOBP	87	yes	-0.141933	0.86768	0.00419673	0.0280814	down	4070, 3911, 4609, 1739, 5310, 3611, 4089, 596, 2719, 650, 28514, 793, 51804, 5727, 2247, 54806, 2246, 30812, 8549, 65266, 2138, 3207, 7475
GO:1903201	regulation of oxidative stress-induced cell death	GOBP	54	yes	0.247485	1.2808	0.00420509	0.0281082	up	5034, 4170, 7295, 29979, 3091, 207, 9688, 4233, 9529, 2309, 23411, 4314
GO:0022408	negative regulation of cell-cell adhesion	GOBP	119	yes	-0.126217	0.881423	0.00425787	0.0284315	down	972, 301, 999, 9314, 3659, 5747, 53833, 3620, 1739, 3965, 5420, 1051, 23560, 441478, 8764, 114897, 3718, 3717, 56940, 9306, 6693, 10385, 3902, 201633, 80139, 50943, 7292, 26279, 8654, 3559, 11314, 84524, 11326, 239, 79679, 1493, 26191, 3077, 54900, 79626, 124872, 2796, 6375, 8995
GO:0070227	lymphocyte apoptotic process	GOBP	61	yes	-0.155921	0.855627	0.0042708	0.0284882	down	972, 3091, 207, 7157, 3620, 3965, 6352, 1942, 5585, 101, 10018, 3718, 355, 81704, 8915, 57181, 939, 3559, 155038, 84524, 695, 5133, 917, 356
GO:0021889	olfactory bulb interneuron differentiation	GOBP	8	yes	-0.270819	0.762755	0.00430236	0.0286691	down	6091, 22809, 6092, 2066
GO:0000466	maturation of 5.8S rRNA from tricistronic rRNA transcript (SSU-rRNA, 5.8S rRNA, LSU-rRNA)	GOBP	21	yes	0.320683	1.37807	0.00434269	0.0289078	up	23481, 23016, 23404, 51010, 55759, 11340, 112479
GO:0098857	membrane microdomain	GOCC	252	yes	-0.0886284	0.915186	0.00597567	0.0290091	down	5230, 114569, 483, 999, 6281, 330, 824, 2817, 3945, 9368, 150696, 3383, 2697, 7851, 23603, 26509, 7132, 2773, 8837, 5045, 5912, 5359, 6386, 1739, 1604, 7186, 7133, 5788, 5420, 55004, 920, 19, 23673, 2770, 8692, 3635, 1756, 973, 200576, 23180, 355, 8915, 3055, 3717, 2534, 3937, 7097, 3667, 3932, 962, 28514, 25999, 1946, 150372, 4038, 27040, 9472, 7535, 5727, 7096, 146760, 10333, 948, 5577, 909, 69…
GO:0032836	glomerular basement membrane development	GOBP	9	yes	-0.262935	0.768792	0.00440063	0.0292633	down	4643, 1286, 1285, 4868
GO:0045103	intermediate filament-based process	GOBP	41	yes	0.265	1.30343	0.00443718	0.0294759	up	3861, 3853, 3868, 5317, 1674, 286887, 5318, 4747, 4741, 3849, 3857
GO:0050806	positive regulation of synaptic transmission	GOBP	97	yes	-0.133598	0.874942	0.00452565	0.0300326	down	4915, 27020, 760, 1855, 4204, 5764, 10769, 6844, 6809, 9001, 2903, 23373, 6285, 22941, 6543, 6857, 6616, 5021, 1524, 9378, 7476, 22997, 112755, 1812, 7101, 54413, 25769, 81832, 22999
GO:1990266	neutrophil migration	GOBP	77	yes	-0.144684	0.865295	0.00467608	0.0309352	down	972, 3689, 6364, 6352, 5880, 101, 6363, 57580, 5293, 3071, 5142, 1907, 1236, 120425, 7409, 57118, 6283, 5294, 51561, 54210, 6357, 3579, 6375, 6846, 10344
GO:0006369	termination of RNA polymerase II transcription	GOBP	63	yes	0.216834	1.24214	0.00473659	0.0313033	up	9775, 22916, 9939, 8683, 10189, 9785, 53981, 4686, 81608, 1478, 8106, 134353
GO:0002690	positive regulation of leukocyte chemotaxis	GOBP	75	yes	-0.145215	0.864837	0.00474539	0.0313293	down	972, 4283, 6278, 3965, 6352, 5880, 6363, 1435, 3071, 3570, 1907, 63940, 2150, 1236, 57118, 1235, 3569, 51561, 729230, 8740, 3579, 3592, 6375, 8995
GO:0006401	RNA catabolic process	GOBP	307	yes	0.119425	1.12685	0.00479803	0.0316444	up	1981, 6152, 6165, 11224, 678, 7832, 8761, 9775, 25804, 22916, 9939, 1977, 246175, 4686, 6499, 167227, 80153, 472, 23016, 23404, 81892, 51010, 57690, 79899, 11340, 246243, 118460, 64282, 6039, 10595, 56164
GO:0045086	positive regulation of interleukin-2 biosynthetic process	GOBP	13	yes	-0.243587	0.783811	0.00482648	0.0317669	down	920, 916, 3662, 940, 941
GO:0002710	negative regulation of T cell mediated immunity	GOBP	14	yes	-0.243541	0.783848	0.00484195	0.0318095	down	53833, 5788, 56940, 6693, 50943, 3575, 3077, 6504, 6375
GO:0071025	RNA surveillance	GOBP	14	yes	0.36461	1.43995	0.00484284	0.0318095	up	23016, 23404, 51010, 11340, 118460
GO:0045187	regulation of circadian sleep/wake cycle, sleep	GOBP	10	yes	-0.261475	0.769915	0.00485626	0.0318652	down	8863, 5730, 3569, 3737, 51738
GO:1903364	positive regulation of cellular protein catabolic process	GOBP	186	yes	0.13501	1.14455	0.00488024	0.0319899	up	5708, 10134, 6613, 1075, 29979, 207, 5700, 4193, 10197, 5747, 8078, 5707, 7128, 25897, 5686, 2932, 127544, 5713, 10221, 9709, 5717, 55905, 93974, 51667, 5347, 25820, 51529, 1855, 7324, 28951, 5718, 10769, 5716, 64326, 29882, 4092, 1263, 90865, 115992, 90637, 85409, 144165, 79589, 54941, 1950
GO:0042107	cytokine metabolic process	GOBP	109	yes	-0.130685	0.877494	0.0048979	0.032073	down	9314, 3659, 4790, 6364, 1051, 7072, 920, 28951, 1536, 148022, 3635, 10644, 916, 8915, 59307, 4050, 6693, 3902, 3662, 50943, 7096, 10333, 9966, 2069, 5125, 3569, 79589, 940, 64170, 10642, 29949, 3625, 7124, 51284, 54210, 2205, 729230, 10148, 54106, 941, 115650, 51738
GO:0044106	cellular amine metabolic process	GOBP	131	yes	0.178285	1.19517	0.00490705	0.0321003	up	6303, 5708, 5700, 10197, 5707, 3620, 262, 5686, 5713, 4128, 6611, 5717, 1728, 6723, 501, 4204, 5718, 5716, 4929, 3251, 8942, 9056, 1119, 54498, 55349, 23498, 1757, 1812, 635, 169355, 1621
GO:0035338	long-chain fatty-acyl-CoA biosynthetic process	GOBP	35	yes	0.268052	1.30742	0.00491298	0.0321065	up	6319, 9524, 2194, 47, 64834, 60481, 2181, 2180, 6576, 51144, 79966, 79071, 23305, 284486
GO:0005742	mitochondrial outer membrane translocase complex	GOCC	11	yes	0.388551	1.47484	0.00669049	0.0322836	up	9868, 10452, 401505
GO:0002717	positive regulation of natural killer cell mediated immunity	GOBP	19	yes	-0.225768	0.797903	0.00495504	0.0323185	down	5817, 3902, 7409, 114836, 4068, 56253, 10666, 259197, 3592, 117157
GO:0060421	positive regulation of heart growth	GOBP	29	yes	-0.195342	0.822553	0.00495547	0.0323185	down	3516, 2263, 32, 9472, 2247, 2627, 23414, 7472, 5629, 2066
GO:0007187	G-protein coupled receptor signaling pathway, coupled to cyclic nucleotide second messenger	GOBP	133	yes	-0.130535	0.877626	0.00496453	0.0323448	down	301, 9368, 2773, 5996, 2768, 2770, 5744, 112, 115, 5567, 54331, 79924, 5734, 1903, 2550, 2774, 135, 8698, 4157, 6752, 5739, 2825, 2781, 768239, 3363, 1268, 4987, 5732, 1812, 147, 2914, 3357, 27201, 1269, 64805, 2829, 2831, 2917
GO:1902600	hydrogen ion transmembrane transport	GOBP	118	yes	0.182372	1.20006	0.00498453	0.0324423	up	518, 56901, 523, 10476, 533, 9550, 9114, 9551, 29796, 51606, 4891, 125965, 84679, 245973, 389015, 525
GO:0000176	nuclear exosome (RNase complex)	GOCC	16	yes	0.339435	1.40415	0.00676738	0.0324591	up	23016, 23404, 51010, 11340, 10438, 118460
GO:0072080	nephron tubule development	GOBP	83	yes	-0.141197	0.868318	0.00501046	0.0325581	down	4070, 3911, 4609, 1739, 5310, 3611, 4089, 596, 2719, 650, 28514, 793, 51804, 5727, 2247, 54806, 2246, 30812, 65266, 2138, 3207, 7475
GO:0048484	enteric nervous system development	GOBP	10	yes	-0.254345	0.775424	0.00501647	0.0325581	down	30812, 6663, 5979
GO:1900424	regulation of defense response to bacterium	GOBP	9	yes	0.398622	1.48977	0.00501751	0.0325581	up	2150, 5650, 23208, 25818
GO:0035455	response to interferon-alpha	GOBP	19	yes	-0.218578	0.803661	0.00502511	0.0325746	down	5610, 558, 3455, 6770
GO:0000187	activation of MAPK activity	GOBP	135	yes	-0.115475	0.890943	0.00503401	0.0325848	down	972, 6464, 1849, 7852, 200958, 1942, 5604, 7161, 5585, 1848, 5606, 101, 6363, 7867, 10454, 10818, 4188, 408, 650, 3656, 3815, 11184, 4294, 2247, 9294, 2246, 727, 7124, 2205, 8600, 1139, 959, 1950, 4908, 2914, 5063, 51738, 255324
GO:0045104	intermediate filament cytoskeleton organization	GOBP	40	yes	0.264769	1.30313	0.00503679	0.0325848	up	3861, 3853, 3868, 5317, 1674, 286887, 5318, 4747, 4741, 3849, 3857
GO:0004415	hyalurononglucosaminidase activity	GOMF	6	yes	0.480598	1.61704	0.00328856	0.0327112	up	8692, 3373
GO:0016616	oxidoreductase activity, acting on the CH-OH group of donors, NAD or NADP as acceptor	GOMF	176	yes	0.180243	1.19751	0.00331767	0.0327526	up	3945, 2194, 4191, 6652, 1488, 51109, 51144, 622, 1646, 51181, 127281, 1645, 11112, 8514, 650, 10257, 8644, 4199, 112724, 10202, 10170, 3291, 8608, 441282, 121214, 145226, 130752
GO:0016074	snoRNA metabolic process	GOBP	12	yes	0.371143	1.44939	0.00507606	0.0328058	up	1736, 55505, 23404, 51010, 118460
GO:0005847	mRNA cleavage and polyadenylation specificity factor complex	GOCC	13	yes	0.352571	1.42272	0.00694686	0.0329651	up	53981, 8394, 81608, 1478, 10898
GO:0044291	cell-cell contact zone	GOCC	65	yes	0.21661	1.24186	0.00699435	0.0329651	up	3728, 1674, 2697, 5912, 7082, 1739, 4619, 5058, 4892, 817, 57826, 5318, 9472, 80115, 6546, 2258
GO:0035869	ciliary transition zone	GOCC	28	yes	-0.196732	0.821411	0.00699635	0.0329651	down	5108, 84747, 79867, 54806, 79600, 27241, 91147, 80776, 79583
hsa00020	Citrate cycle (TCA cycle)	KEGG	29	yes	0.305283	1.35701	0.00588358	0.0331339	up	4191, 47, 1737, 8803, 5105
GO:0031348	negative regulation of defense response	GOBP	122	yes	-0.120585	0.886402	0.00513948	0.0331491	down	2950, 3428, 9314, 5176, 7850, 7132, 53833, 7128, 29, 9021, 4790, 3965, 2113, 5467, 7133, 6318, 284207, 5610, 27342, 11213, 7301, 6693, 4907, 4856, 5734, 50943, 27293, 10225, 3559, 79626, 3670, 5468, 1524, 116379, 1139, 1269, 51738
GO:0072599	establishment of protein localization to endoplasmic reticulum	GOBP	107	yes	0.173256	1.18917	0.00515905	0.033242	up	6152, 6165, 11224, 29927, 7095, 6730, 58477, 6729, 23480
GO:0003730	mRNA 3'-UTR binding	GOMF	53	yes	0.251211	1.28558	0.00340115	0.0333262	up	678, 25946, 10644, 80315, 10642
GO:0048247	lymphocyte chemotaxis	GOBP	47	yes	-0.170405	0.843324	0.00520028	0.0334074	down	6278, 6364, 6352, 101, 6363, 11240, 5293, 1880, 2833, 9420, 5294, 729230, 6357, 8740, 6375, 6846, 10344
GO:0022602	ovulation cycle process	GOBP	66	yes	-0.148525	0.861979	0.00523002	0.033565	down	4323, 3383, 5066, 4089, 1051, 4254, 2309, 596, 9510, 5156, 408, 23411, 6586, 4327, 3815, 2099, 2069, 6092, 3625, 658, 2796, 1139, 89766
GO:0001787	natural killer cell proliferation	GOBP	10	yes	-0.253703	0.775923	0.00523732	0.0335783	down	3600, 114836, 26191, 51561, 6504
GO:0005832	chaperonin-containing T-complex	GOCC	15	yes	0.386668	1.47207	0.00720903	0.0337686	up	7203, 908, 6950, 10694
GO:0000422	mitophagy	GOBP	92	yes	0.190874	1.21031	0.00531509	0.0339892	up	8878, 2017, 11140, 3091, 3099, 86, 2011, 8607, 93974, 26100, 64422, 55486, 664, 22863, 1459, 115201, 285973
GO:0061726	mitochondrion disassembly	GOBP	92	yes	0.190874	1.21031	0.00531509	0.0339892	up	8878, 2017, 11140, 3091, 3099, 86, 2011, 8607, 93974, 26100, 64422, 55486, 664, 22863, 1459, 115201, 285973
GO:0042089	cytokine biosynthetic process	GOBP	107	yes	-0.130772	0.877418	0.00531724	0.0339892	down	9314, 3659, 4790, 6364, 1051, 7072, 920, 28951, 1536, 148022, 3635, 10644, 916, 8915, 59307, 4050, 6693, 3902, 3662, 50943, 7096, 10333, 2069, 5125, 3569, 79589, 940, 64170, 10642, 29949, 3625, 7124, 51284, 2205, 729230, 10148, 54106, 941, 115650, 51738
GO:0042130	negative regulation of T cell proliferation	GOBP	46	yes	-0.170033	0.843637	0.00535353	0.0341872	down	53833, 3620, 1739, 3965, 1051, 8764, 6693, 10385, 50943, 26279, 8654, 3559, 11326, 1493, 2796, 6375
GO:0016628	oxidoreductase activity, acting on the CH-CH group of donors, NAD or NADP as acceptor	GOMF	35	yes	0.319353	1.37624	0.00353195	0.0343515	up	1718, 2194, 1717, 644, 1646, 1645, 8644
GO:0048286	lung alveolus development	GOBP	36	yes	-0.178173	0.836798	0.00542509	0.0346098	down	9394, 171023, 64759, 10630, 2263, 91461, 1907, 2627
GO:0030593	neutrophil chemotaxis	GOBP	71	yes	-0.146453	0.863766	0.00546943	0.0348581	down	972, 3689, 6364, 6352, 5880, 6363, 57580, 5293, 3071, 5142, 1907, 1236, 120425, 7409, 57118, 6283, 5294, 51561, 54210, 6357, 3579, 6375, 6846, 10344
GO:0016202	regulation of striated muscle tissue development	GOBP	101	yes	-0.130928	0.877281	0.00548683	0.0349345	down	2817, 2697, 3516, 4089, 7161, 2263, 596, 6665, 650, 28514, 51804, 9472, 84466, 2247, 6285, 50937, 6474, 22943, 89780, 2627, 7480, 9099, 23414, 4618, 7472, 2066, 5950
GO:0009988	cell-cell recognition	GOBP	44	yes	-0.173669	0.840575	0.00549503	0.0349521	down	7203, 6950, 10694, 1739, 6363, 30815, 2525, 81704, 54742, 1794, 5551, 923, 1236, 1047, 84329, 2047, 5016, 79820
GO:0048873	homeostasis of number of cells within a tissue	GOBP	25	yes	-0.19829	0.820132	0.00550102	0.0349556	down	53833, 11151, 1435, 596, 54440, 924, 2323, 2624, 3574
GO:0004526	ribonuclease P activity	GOMF	11	yes	0.394167	1.48315	0.00362657	0.0350124	up	54913, 10248, 10799
GO:0030513	positive regulation of BMP signaling pathway	GOBP	29	yes	-0.189824	0.827105	0.00554094	0.0351746	down	3516, 3611, 4089, 4756, 63893, 2719, 494470, 286204, 2627, 375616, 8200
GO:0072577	endothelial cell apoptotic process	GOBP	38	yes	-0.176367	0.83831	0.00555757	0.0352454	down	80781, 3383, 7128, 2309, 958, 9037, 57124, 8644, 1285, 356, 959, 7015
GO:0070979	protein K11-linked ubiquitination	GOBP	27	yes	0.290318	1.33685	0.00556387	0.0352506	up	7328, 7332, 7319, 51529, 25847, 29882, 7325
GO:0060272	embryonic skeletal joint morphogenesis	GOBP	12	yes	0.368842	1.44606	0.00558374	0.0353417	up	6474, 3373, 1280, 3207
GO:0006406	mRNA export from nucleus	GOBP	123	yes	0.174078	1.19015	0.00561281	0.035456	up	84248, 9775, 7979, 22916, 9939, 8683, 10189, 1977, 9785, 53981, 9688, 4686, 79902, 55677, 81608, 55308, 79023, 8106
GO:0071427	mRNA-containing ribonucleoprotein complex export from nucleus	GOBP	123	yes	0.174078	1.19015	0.00561281	0.035456	up	84248, 9775, 7979, 22916, 9939, 8683, 10189, 1977, 9785, 53981, 9688, 4686, 79902, 55677, 81608, 55308, 79023, 8106
GO:0006637	acyl-CoA metabolic process	GOBP	106	yes	0.192773	1.21261	0.00567492	0.0357781	up	6319, 9524, 2194, 47, 64834, 60481, 2181, 2180, 6576, 84532, 51144, 79966, 4597, 8942, 1737, 8803, 84649, 32, 57546, 79071, 23305, 284486
GO:0035383	thioester metabolic process	GOBP	106	yes	0.192773	1.21261	0.00567492	0.0357781	up	6319, 9524, 2194, 47, 64834, 60481, 2181, 2180, 6576, 84532, 51144, 79966, 4597, 8942, 1737, 8803, 84649, 32, 57546, 79071, 23305, 284486
GO:1900407	regulation of cellular response to oxidative stress	GOBP	65	yes	0.225585	1.25306	0.00570209	0.0359143	up	5034, 4170, 7295, 29979, 3091, 207, 9688, 4233, 9529, 2309, 23411, 4314, 948, 7124
hsa00900	Terpenoid backbone biosynthesis	KEGG	14	yes	0.402242	1.49517	0.00665862	0.0360159	up	2224, 3157, 3422, 4597, 23590
hsa03015	mRNA surveillance pathway	KEGG	73	yes	0.199134	1.22035	0.00673195	0.0360159	up	26528, 8761, 9775, 22916, 9939, 10189, 5527, 53981, 4686, 5525, 81608, 5523, 5529, 1478, 10898, 8106, 132430, 4440
GO:0070498	interleukin-1-mediated signaling pathway	GOBP	20	yes	-0.213525	0.807732	0.00573955	0.0360869	down	7850, 7444, 3656, 11213, 3569, 171392, 8808
GO:0098542	defense response to other organism	GOBP	368	yes	-0.079931	0.92318	0.00574072	0.0360869	down	100423062, 1173, 375, 3428, 330, 4069, 4057, 163351, 4283, 162, 3659, 6278, 5861, 7132, 7128, 340061, 5359, 1175, 85236, 6364, 256987, 4938, 55324, 3516, 727897, 79792, 5788, 1051, 920, 3265, 9466, 54476, 10053, 51606, 5366, 29108, 148022, 387695, 22861, 596, 8764, 8692, 1174, 27297, 958, 5610, 81559, 664, 60489, 3055, 925, 2534, 7097, 1794, 926, 3455, 10578, 3570, 3394, 5551, 3932, 6693, 8349, 2…
GO:1903320	regulation of protein modification by small protein conjugation or removal	GOBP	278	yes	0.110909	1.11729	0.00575085	0.0361153	up	3320, 5708, 330, 29979, 5700, 7332, 10197, 5747, 5707, 7128, 5686, 23028, 64359, 5713, 55611, 6478, 9709, 5717, 7334, 9683, 5347, 1025, 51529, 54602, 7324, 59343, 23560, 9529, 5718, 5716, 148022, 54165, 57599, 54552, 29882, 8915, 201254, 2534, 51684, 408, 4092, 84259, 7965, 26232, 10196, 165324, 91947, 55869, 23551, 123879, 26191, 144165, 3077, 85453, 286151, 643904, 1950, 5582
GO:0060071	Wnt signaling pathway, planar cell polarity pathway	GOBP	128	yes	0.167239	1.18204	0.00580811	0.0364394	up	1173, 5708, 5700, 10197, 5707, 5686, 5713, 1175, 5717, 57822, 57216, 1855, 5718, 5716, 8324, 2719, 144165, 7976, 84870, 85407, 4919
GO:0007389	pattern specification process	GOBP	397	yes	-0.0774127	0.925508	0.0058186	0.0364696	down	8626, 2697, 162, 3091, 7832, 10006, 3516, 4089, 57822, 57534, 57216, 7528, 1954, 1848, 2263, 59343, 79971, 84678, 6493, 4086, 441478, 8829, 63917, 5075, 472, 10818, 4188, 129880, 80055, 7026, 5567, 57619, 2719, 6688, 51684, 650, 6045, 51098, 28514, 26160, 65057, 29880, 9742, 92, 200894, 4038, 79809, 57728, 80199, 4855, 388591, 5727, 6935, 63950, 23432, 50805, 54806, 367, 79600, 50937, 2246, 54345…
GO:0016653	oxidoreductase activity, acting on NAD(P)H, heme protein as acceptor	GOMF	16	yes	0.393078	1.48153	0.0038061	0.0364774	up	5447, 1728, 27158, 51700, 51167, 606495
GO:0060333	interferon-gamma-mediated signaling pathway	GOBP	70	yes	-0.147211	0.863112	0.00582982	0.0365044	down	960, 3383, 4502, 11140, 7412, 3659, 3459, 3460, 9021, 81603, 4938, 3660, 817, 4261, 3055, 3717, 3394, 8651, 3662, 4684, 5468, 816, 11074, 7294
GO:0008540	proteasome regulatory particle, base subcomplex	GOCC	12	yes	0.356946	1.42896	0.00790621	0.036819	up	5708, 5700, 5707, 5716
GO:0071013	catalytic step 2 spliceosome	GOCC	85	yes	0.176271	1.19276	0.00798543	0.036973	up	10492, 23450, 9775, 9939, 10189, 9785, 6627, 10286, 51645
GO:0090218	positive regulation of lipid kinase activity	GOBP	32	yes	-0.18522	0.830921	0.00591879	0.0370255	down	5747, 7410, 6363, 1917, 2321, 5156, 22863, 3667, 3815, 1236, 2247, 2268, 2322, 2046
GO:0001667	ameboidal-type cell migration	GOBP	330	yes	-0.0834864	0.919904	0.00592992	0.0370427	down	3868, 4070, 6273, 3911, 10755, 9314, 8766, 23603, 3091, 51094, 5176, 207, 6091, 1460, 397, 5747, 4318, 57111, 11171, 154810, 3689, 2113, 5217, 3611, 1942, 23332, 5467, 9564, 25930, 11235, 5585, 2768, 4254, 54910, 1954, 9688, 4233, 6776, 8394, 57449, 8829, 8692, 1839, 57556, 9037, 6286, 1545, 22846, 7026, 11156, 5797, 5168, 3695, 79899, 3815, 4856, 285, 114757, 2247, 3676, 2246, 54345, 5308, 3373,…
GO:0033238	regulation of cellular amine metabolic process	GOBP	66	yes	0.206393	1.22924	0.00594423	0.0370453	up	5708, 5700, 10197, 5707, 5686, 5713, 5717, 1728, 5718, 5716, 4929, 3251, 9056, 1812
GO:0050777	negative regulation of immune response	GOBP	103	yes	-0.129506	0.87853	0.00594497	0.0370453	down	301, 3428, 53833, 7128, 29, 3965, 1604, 5788, 6318, 9466, 3635, 3718, 56940, 27342, 11213, 7301, 6693, 90865, 8832, 50943, 7292, 10225, 64092, 3559, 11314, 3575, 1493, 3077, 246, 6504, 7124, 5468, 729230, 6375, 8995
GO:0015732	prostaglandin transport	GOBP	13	yes	-0.235614	0.790086	0.00595201	0.0370533	down	6578, 10257, 8600
GO:0042346	positive regulation of NF-kappaB import into nucleus	GOBP	23	yes	-0.201919	0.817161	0.00596623	0.0370701	down	3965, 56892, 7205, 6363, 7097, 939, 8809, 51561, 7124, 51284, 10913, 1896, 54106, 8740
GO:1900273	positive regulation of long-term synaptic potentiation	GOBP	9	yes	-0.258288	0.772373	0.00598687	0.0371625	down	27020, 2903, 23373
GO:0016641	oxidoreductase activity, acting on the CH-NH2 group of donors, oxygen as acceptor	GOMF	18	yes	-0.245255	0.782505	0.00391193	0.0372201	down	7412, 4128, 55163, 259307
GO:1903725	regulation of phospholipid metabolic process	GOBP	52	yes	-0.160432	0.851775	0.00600783	0.0372277	down	375, 9314, 5747, 7410, 8503, 5295, 113791, 6363, 9711, 2321, 5156, 22863, 3667, 376497, 3815, 1236, 2247, 2268, 2170, 146850, 2322, 3357, 2046
GO:0031343	positive regulation of cell killing	GOBP	35	yes	-0.186832	0.829583	0.00600895	0.0372277	down	10018, 5817, 2150, 3902, 7409, 114836, 3594, 4068, 51561, 56253, 2208, 26228, 10666, 259197, 3592, 6375
GO:0043022	ribosome binding	GOMF	47	yes	0.247833	1.28125	0.00399469	0.0372976	up	29927, 83939, 1965, 3954, 54915, 51119, 253260, 80315, 91574, 3396, 137994
GO:0015276	ligand-gated ion channel activity	GOMF	138	yes	-0.137035	0.87194	0.00400531	0.0372976	down	9635, 801, 6337, 2568, 1739, 309, 6338, 357, 83988, 9424, 3708, 2903, 6340, 3772, 2906, 6263, 3762, 8989, 3768, 1258, 3359, 3766, 2561, 1139, 8973, 2563, 1259, 10021, 2567, 1137, 54714
GO:0022834	ligand-gated channel activity	GOMF	138	yes	-0.137035	0.87194	0.00400531	0.0372976	down	9635, 801, 6337, 2568, 1739, 309, 6338, 357, 83988, 9424, 3708, 2903, 6340, 3772, 2906, 6263, 3762, 8989, 3768, 1258, 3359, 3766, 2561, 1139, 8973, 2563, 1259, 10021, 2567, 1137, 54714
GO:0016835	carbon-oxygen lyase activity	GOMF	68	yes	0.234127	1.2638	0.00404292	0.0373828	up	2547, 2194, 771, 760, 2026, 27301, 79876, 2762, 80324, 7390, 5805, 8091, 761, 200558
GO:2000352	negative regulation of endothelial cell apoptotic process	GOBP	20	yes	-0.209773	0.810769	0.00605414	0.0374716	down	3383, 7128, 9037, 7015
GO:0090175	regulation of establishment of planar polarity	GOBP	129	yes	0.165687	1.1802	0.00607	0.0375038	up	1173, 5708, 5700, 10197, 5707, 5686, 5713, 1175, 5717, 57822, 57216, 1855, 5718, 5716, 8324, 2719, 144165, 7976, 84870, 85407, 4919
GO:0070374	positive regulation of ERK1 and ERK2 cascade	GOBP	135	yes	-0.115875	0.890586	0.006071	0.0375038	down	972, 960, 3383, 11331, 6278, 27020, 3965, 6364, 6352, 5604, 3265, 2263, 5906, 6363, 1436, 29108, 8829, 817, 5156, 408, 650, 4835, 2150, 1236, 1880, 2247, 948, 2246, 5345, 26191, 3569, 246, 168667, 6504, 7124, 6357, 9290, 8600, 285016, 388325, 6375, 3357, 57105, 2066, 6846, 10344
GO:0002831	regulation of response to biotic stimulus	GOBP	119	yes	-0.12028	0.886672	0.00610323	0.0375989	down	1173, 375, 330, 4057, 162, 7128, 340061, 1175, 10221, 1604, 920, 54476, 10053, 51606, 5817, 29108, 1174, 5610, 60489, 59307, 3055, 2534, 1794, 926, 3932, 6693, 2150, 5650, 200316, 9844, 919, 3600, 130340, 23208, 3559, 25818, 940, 3594, 51561, 4064, 117854, 56253, 10666, 259197, 3592
GO:0015992	proton transport	GOBP	170	yes	0.154398	1.16696	0.00613113	0.0377305	up	9368, 518, 56901, 523, 10476, 533, 9550, 10105, 9114, 7351, 9551, 29796, 51382, 51606, 4891, 7355, 6565, 84329, 125965, 84679, 54997, 245973, 389015, 6564, 525
GO:0060219	camera-type eye photoreceptor cell differentiation	GOBP	13	yes	-0.245364	0.78242	0.00614377	0.0377722	down	5764, 30812, 6096
GO:0006818	hydrogen transport	GOBP	172	yes	0.153132	1.16548	0.00616459	0.037864	up	9368, 518, 56901, 523, 10476, 533, 9550, 10105, 9114, 7351, 9551, 29796, 51382, 51606, 4891, 7355, 6565, 84329, 125965, 84679, 54997, 245973, 389015, 6564, 525
GO:0010453	regulation of cell fate commitment	GOBP	23	yes	-0.206674	0.813285	0.00617062	0.0378649	down	8543, 3516, 1848, 2263, 8324, 2247, 367, 22943, 3594, 89780, 51561, 5081, 8995
GO:0045940	positive regulation of steroid metabolic process	GOBP	18	yes	-0.215552	0.806096	0.00621272	0.038087	down	5447, 6770, 2246, 7124
GO:0035591	signaling adaptor activity	GOMF	80	yes	-0.147071	0.863233	0.00416265	0.0382207	down	2885, 6464, 4690, 5295, 23623, 2887, 143098, 10019, 10818, 8935, 8027, 6503, 3667, 8844, 10044, 27040, 9046, 8835, 9456, 8506, 84174, 940, 4068, 10750, 9402, 50852, 79368, 26228, 2888
GO:0071027	nuclear RNA surveillance	GOBP	12	yes	0.374329	1.45402	0.00625449	0.0382344	up	23016, 23404, 51010, 11340, 118460
GO:0071028	nuclear mRNA surveillance	GOBP	11	yes	0.374329	1.45402	0.00625449	0.0382344	up	23016, 23404, 51010, 11340, 118460
GO:1900408	negative regulation of cellular response to oxidative stress	GOBP	37	yes	0.277212	1.31945	0.00626983	0.0382344	up	7295, 3091, 207, 9688, 4233, 9529, 23411
GO:1902883	negative regulation of response to oxidative stress	GOBP	37	yes	0.277212	1.31945	0.00626983	0.0382344	up	7295, 3091, 207, 9688, 4233, 9529, 23411
GO:1903202	negative regulation of oxidative stress-induced cell death	GOBP	37	yes	0.277212	1.31945	0.00626983	0.0382344	up	7295, 3091, 207, 9688, 4233, 9529, 23411
GO:0071549	cellular response to dexamethasone stimulus	GOBP	19	yes	-0.212249	0.808763	0.00627241	0.0382344	down	5176, 114907, 6770, 3569
GO:0006400	tRNA modification	GOBP	86	yes	0.207938	1.23114	0.00628473	0.0382732	up	64118, 55226, 24140, 79876, 51605, 80324, 115708, 79693, 4234, 9836, 27079, 123263
GO:0030663	COPI-coated vesicle membrane	GOCC	20	yes	0.327689	1.38776	0.00839153	0.0384228	up	22820, 9276, 10945, 23423, 51226
GO:0008305	integrin complex	GOCC	45	yes	-0.181499	0.834019	0.00839449	0.0384228	down	3655, 3685, 3689, 3683, 3684, 3682, 3695, 3676, 8516
GO:0008378	galactosyltransferase activity	GOMF	40	yes	0.295533	1.34384	0.00421899	0.038469	up	84002, 8702, 8704, 8703, 56913, 10331, 7368, 93010, 9331, 10317, 79369, 8707
GO:0002517	T cell tolerance induction	GOBP	10	yes	-0.257294	0.773141	0.00638024	0.0388122	down	3620, 916, 50943, 3559, 29851
GO:2000351	regulation of endothelial cell apoptotic process	GOBP	32	yes	-0.184183	0.831784	0.0063853	0.0388122	down	80781, 3383, 7128, 2309, 958, 9037, 57124, 8644, 356, 959, 7015
GO:0006596	polyamine biosynthetic process	GOBP	17	yes	0.365318	1.44097	0.0064413	0.0391157	up	6303, 262, 6611, 6723, 54498
GO:0019695	choline metabolic process	GOBP	9	yes	-0.273186	0.760951	0.00644926	0.0391272	down	501, 1119, 55349, 133121, 1757, 635
GO:0046488	phosphatidylinositol metabolic process	GOBP	259	yes	-0.10074	0.904168	0.00646807	0.0392043	down	375, 2885, 3628, 10423, 79837, 8503, 4254, 5295, 54965, 8396, 9651, 2263, 8394, 1436, 55697, 5329, 79887, 5341, 3635, 8818, 1839, 200576, 472, 8776, 10380, 10818, 80055, 5293, 5305, 3631, 2534, 84668, 5156, 3667, 3932, 5277, 376497, 29880, 3815, 3632, 7409, 284098, 2247, 8605, 26279, 2246, 145567, 2069, 9488, 930, 940, 5294, 27124, 80157, 283748, 50852, 9365, 146850, 54106, 9108, 941, 2822, 5288,…
GO:0006006	glucose metabolic process	GOBP	202	yes	0.133213	1.14249	0.00650539	0.0393934	up	2597, 226, 2171, 7167, 5230, 5500, 5223, 4191, 27230, 10776, 51094, 207, 2806, 3099, 5214, 5209, 2932, 2820, 4938, 6652, 5467, 6576, 2026, 5366, 51181, 114897, 1737, 7262, 3667, 5208, 23411, 84649, 5210, 32, 89801, 3569, 5167, 7124, 5105, 648791, 2822, 5950, 51738
GO:0006007	glucose catabolic process	GOBP	23	yes	0.301999	1.35256	0.00654226	0.0395322	up	2597, 226, 7167, 5230, 5223, 3099, 5214, 5209, 2026, 5208, 5210
GO:2000406	positive regulation of T cell migration	GOBP	22	yes	-0.208647	0.811682	0.00654563	0.0395322	down	6278, 6364, 6352, 101, 29108, 8764, 3676, 729230, 8740, 6375
GO:0019883	antigen processing and presentation of endogenous antigen	GOBP	16	yes	-0.23905	0.787375	0.00654673	0.0395322	down	972, 6892, 51752, 64167, 3077, 5243
GO:0045047	protein targeting to ER	GOBP	103	yes	0.171869	1.18752	0.00656766	0.0396214	up	6152, 6165, 11224, 29927, 7095, 6730, 58477, 6729, 23480
GO:0060043	regulation of cardiac muscle cell proliferation	GOBP	28	yes	-0.189413	0.827445	0.00658219	0.0396648	down	2697, 3516, 7161, 2263, 2247, 2627, 23414, 7472, 2066, 5950
GO:0043524	negative regulation of neuron apoptotic process	GOBP	125	yes	-0.116411	0.89011	0.00658718	0.0396648	down	6418, 3065, 4915, 3091, 7832, 5641, 11151, 3611, 7161, 1051, 3265, 4204, 101, 84678, 4929, 8829, 596, 558, 6812, 80315, 3717, 2534, 4747, 10752, 7301, 4671, 51804, 6770, 3981, 128434, 116986, 9244, 2020, 3670, 80823, 23529, 2019, 1271, 627, 2561, 7015, 4908, 27324, 1745, 5582, 8200
GO:0006890	retrograde vesicle-mediated transport, Golgi to ER	GOBP	83	yes	0.191845	1.21148	0.00660893	0.0397347	up	6892, 22820, 9276, 11014, 10749, 8775, 10945, 5861, 23760, 23423, 3831, 4905, 51290, 7405, 83548, 9183, 51226, 83452
GO:0071871	response to epinephrine	GOBP	16	yes	-0.225412	0.798188	0.00661798	0.0397347	down	5142, 6770
GO:0043373	CD4-positive, alpha-beta T cell lineage commitment	GOBP	12	yes	-0.24421	0.783323	0.00662302	0.0397347	down	3662, 50943, 114836, 10538, 3569, 3594, 51561, 4063, 8995
GO:0015837	amine transport	GOBP	46	yes	-0.168528	0.844908	0.00662348	0.0397347	down	10550, 5021, 366, 1268, 1139, 3737, 1812, 8973, 1137, 64805
GO:0007157	heterophilic cell-cell adhesion via plasma membrane cell adhesion molecules	GOBP	42	yes	-0.172524	0.841538	0.00665571	0.039867	down	3383, 7412, 81607, 214, 5817, 3683, 653499, 57228, 923, 4345, 201633, 120425, 56253, 5789, 10666, 259197, 1002
GO:0042391	regulation of membrane potential	GOBP	348	yes	-0.0855948	0.917966	0.00665792	0.039867	down	3728, 488, 483, 1192, 2697, 9775, 1739, 10550, 7351, 88, 93974, 23593, 4719, 1855, 4204, 5764, 5366, 596, 817, 6717, 1756, 79680, 5318, 664, 23111, 10345, 4092, 4897, 9424, 115019, 2903, 388591, 9472, 23373, 9294, 845, 8645, 10962, 8506, 239, 11149, 6546, 3569, 27092, 3786, 23416, 54831, 54207, 9378, 6335, 1258, 3766, 7476, 1268, 22997, 1139, 112755, 3737, 56853, 55800, 10861, 1812, 8973, 54413, …
GO:0045685	regulation of glial cell differentiation	GOBP	45	yes	-0.165898	0.847132	0.00667652	0.0399412	down	6692, 3065, 3572, 7852, 23405, 7161, 3398, 650, 7097, 118738, 4613, 23529, 5468, 6900, 7101, 1745, 1746
GO:0001227	transcriptional repressor activity, RNA polymerase II transcription regulatory region sequence-specific binding	GOMF	150	yes	-0.114549	0.891768	0.00441601	0.0399878	down	3428, 7832, 4790, 2120, 4084, 9603, 5467, 7528, 23186, 3096, 4799, 5017, 53335, 2309, 7022, 200014, 4335, 6688, 6932, 51513, 79365, 3642, 6935, 9242, 84524, 8091, 30818, 23414, 4773, 2019, 27022, 5460, 54039, 140883, 5629, 7101, 25806, 55079
GO:0000159	protein phosphatase type 2A complex	GOCC	25	yes	0.309756	1.36309	0.00881163	0.0401029	up	54205, 5527, 5525, 5523, 5529, 29966, 85407
GO:0046530	photoreceptor cell differentiation	GOBP	41	yes	-0.178398	0.836609	0.00672676	0.040203	down	6774, 4915, 5764, 403, 9742, 112724, 54806, 30812, 6096, 1258, 85407
GO:0050769	positive regulation of neurogenesis	GOBP	333	yes	-0.0796167	0.92347	0.00674543	0.040203	down	1981, 375, 396, 6692, 55754, 3065, 4915, 8766, 3091, 5176, 3572, 6091, 6249, 1523, 4976, 1382, 27020, 5597, 1809, 2932, 23028, 2889, 7852, 2011, 3611, 4690, 23405, 54606, 10494, 5604, 7161, 9139, 4804, 29904, 9423, 8650, 1855, 1954, 5906, 5764, 60436, 1435, 3398, 8829, 596, 57556, 29882, 9037, 22902, 84298, 2534, 4747, 650, 7097, 5753, 90527, 4897, 3815, 1946, 9001, 8437, 23373, 6935, 63950, 2353…
GO:0042659	regulation of cell fate specification	GOBP	13	yes	-0.238589	0.787738	0.00674631	0.040203	down	8543, 1848, 8324, 2247, 367, 22943, 89780
GO:0031349	positive regulation of defense response	GOBP	423	yes	-0.0767575	0.926114	0.00675151	0.040203	down	1508, 5708, 3428, 330, 4057, 4792, 10318, 2697, 3949, 29979, 3659, 2167, 7132, 3572, 5700, 10197, 5707, 3620, 7128, 340061, 5359, 5686, 5641, 5713, 3689, 4790, 5603, 2113, 6352, 5717, 7334, 5971, 5058, 3265, 101, 5718, 5716, 4214, 5817, 29108, 148022, 8692, 7867, 23180, 10454, 8915, 3055, 5567, 3717, 2534, 7097, 3385, 3656, 3684, 11213, 92747, 63940, 923, 7301, 2150, 5650, 2099, 7100, 3902, 90865…
GO:1902882	regulation of response to oxidative stress	GOBP	70	yes	0.213562	1.23808	0.00678907	0.0403445	up	5034, 4170, 7295, 29979, 3091, 207, 9688, 4233, 9529, 2309, 23411, 4314, 948, 7124
GO:0050729	positive regulation of inflammatory response	GOBP	97	yes	-0.127468	0.880322	0.00679081	0.0403445	down	10318, 3949, 2167, 7132, 3572, 3620, 5603, 2113, 6352, 101, 8692, 3717, 7097, 63940, 923, 90865, 1236, 5734, 7292, 3600, 695, 6283, 3569, 940, 81793, 5294, 51561, 7124, 51284, 2205, 729230, 6357, 54106, 2867, 4049, 1268, 8600, 6375, 6846, 8995, 10344, 3605, 3818
GO:0010494	cytoplasmic stress granule	GOCC	34	yes	0.256217	1.29203	0.00893964	0.0404557	up	4904, 8761, 1965, 23185, 1977, 7072, 55239, 10642
GO:0033630	positive regulation of cell adhesion mediated by integrin	GOBP	18	yes	-0.217537	0.804498	0.00682157	0.0404705	down	6352, 5420, 3071, 7535, 5979, 2303
GO:0042417	dopamine metabolic process	GOBP	29	yes	-0.202516	0.816673	0.00683874	0.0405349	down	4128, 4929, 3251, 2903, 1812, 1621
GO:0002711	positive regulation of T cell mediated immunity	GOBP	30	yes	-0.188852	0.827909	0.00685028	0.0405376	down	7186, 5817, 54440, 50943, 7292, 3569, 3594, 51561, 259197, 3592, 6375
GO:0000469	cleavage involved in rRNA processing	GOBP	26	yes	0.292732	1.34008	0.00685178	0.0405376	up	55651, 88745, 23016, 23404, 51010, 11340, 112479
GO:0016408	C-acyltransferase activity	GOMF	20	yes	0.364386	1.43963	0.00451629	0.0406157	up	9517, 6342, 10558, 171546, 165679, 55304
GO:0014033	neural crest cell differentiation	GOBP	74	yes	-0.142087	0.867546	0.00692964	0.0409055	down	3911, 23603, 3091, 4089, 4254, 54910, 8829, 57556, 9037, 80326, 5308, 30812, 58495, 2487, 6663, 5979, 8854, 223117, 3670, 57715, 2303, 9723, 3357, 2066
GO:0046949	fatty-acyl-CoA biosynthetic process	GOBP	36	yes	0.257242	1.29336	0.00693303	0.0409055	up	6319, 9524, 2194, 47, 64834, 60481, 2181, 2180, 6576, 51144, 79966, 79071, 23305, 284486
GO:0055072	iron ion homeostasis	GOBP	77	yes	0.210032	1.23372	0.00694889	0.0409616	up	3934, 4057, 3091, 4609, 4089, 4756, 3163, 4891, 79901, 8692, 81894, 6717, 79689, 7018, 119559, 26872, 3077, 6556, 286133
GO:0010001	glial cell differentiation	GOBP	156	yes	-0.107203	0.898343	0.00698002	0.0411074	down	2950, 928, 6774, 2817, 6692, 3065, 4915, 207, 3572, 7852, 4501, 1031, 3611, 23405, 5604, 7161, 8613, 5803, 1967, 3398, 1021, 666, 650, 7097, 79885, 8891, 28514, 6285, 118738, 79152, 53616, 79006, 30812, 6663, 4613, 10810, 23529, 5453, 5468, 6900, 3766, 92737, 1812, 7101, 54413, 1745, 1746, 5354
GO:0009127	purine nucleoside monophosphate biosynthetic process	GOBP	106	yes	0.208431	1.23174	0.00699346	0.0411113	up	226, 6774, 518, 8833, 10476, 9551, 353, 205, 3251, 272, 122622
GO:0009168	purine ribonucleoside monophosphate biosynthetic process	GOBP	106	yes	0.208431	1.23174	0.00699346	0.0411113	up	226, 6774, 518, 8833, 10476, 9551, 353, 205, 3251, 272, 122622
GO:0002699	positive regulation of immune effector process	GOBP	153	yes	-0.111291	0.894678	0.00703294	0.0412889	down	972, 301, 3965, 6813, 7186, 5880, 6363, 5817, 51237, 8764, 958, 8915, 54440, 27342, 51010, 57102, 4602, 2150, 5650, 3902, 90865, 8832, 118460, 50943, 7409, 7535, 7292, 2268, 948, 11314, 114836, 695, 25818, 3569, 940, 3594, 4068, 7293, 51561, 2624, 23529, 7124, 2205, 729230, 117854, 56253, 2208, 30009, 2867, 4049, 941, 10666, 259197, 3592, 117157, 6375, 5950
GO:0000920	cell separation after cytokinesis	GOBP	17	yes	0.329574	1.39038	0.0070365	0.0412889	up	5119, 57132, 9525, 27243, 27183, 51510, 91782, 55165, 25978
GO:0034762	regulation of transmembrane transport	GOBP	374	yes	-0.0814228	0.921804	0.00704551	0.0413042	down	483, 375, 1192, 801, 9368, 7417, 4283, 2697, 29979, 207, 4318, 1739, 11151, 10105, 9446, 88, 65268, 760, 6844, 1536, 596, 817, 27075, 57620, 6717, 1756, 81831, 4644, 5142, 8514, 338440, 10345, 55636, 9424, 1193, 6588, 9001, 388591, 9472, 782, 3772, 9456, 3749, 84329, 3792, 845, 8645, 486, 6271, 6546, 930, 5294, 89780, 5587, 30818, 54997, 3750, 623, 27092, 65266, 3786, 3762, 23416, 54207, 3779, 37…
GO:0016282	eukaryotic 43S preinitiation complex	GOCC	13	yes	0.345095	1.41212	0.00926531	0.0416939	up	8662, 8668, 10480, 8669
GO:0048592	eye morphogenesis	GOBP	117	yes	-0.119349	0.887498	0.00712313	0.0417212	down	6774, 4915, 3091, 7528, 5764, 84678, 596, 221935, 220, 1296, 10818, 357, 5797, 28514, 793, 112724, 6935, 54806, 50937, 5308, 30812, 6096, 286204, 2047, 362, 7472, 356, 85407, 5629, 5950, 25806
GO:0007423	sensory organ development	GOBP	433	yes	-0.0718613	0.93066	0.00714724	0.0418244	down	6152, 1889, 6774, 9368, 10541, 3065, 4915, 2697, 9314, 3091, 5176, 86, 1052, 29, 10848, 10804, 1739, 5396, 10765, 2820, 50506, 3516, 4814, 4094, 5205, 57822, 22931, 57216, 1027, 7528, 9423, 1855, 121227, 2263, 5764, 10018, 60436, 84678, 8829, 596, 221935, 4628, 220, 1296, 1545, 10818, 23210, 5156, 357, 650, 1301, 55636, 5797, 28514, 793, 9742, 80326, 388552, 51804, 112724, 1497, 57728, 10461, 110…
GO:0046637	regulation of alpha-beta T cell differentiation	GOBP	48	yes	-0.162571	0.849956	0.00716289	0.0418779	down	301, 51043, 3965, 4860, 6363, 3718, 54440, 3071, 9308, 4602, 3662, 50943, 7535, 7292, 3569, 3594, 51561, 941, 8995
GO:0033002	muscle cell proliferation	GOBP	147	yes	-0.109208	0.896544	0.00718681	0.0419796	down	2950, 2547, 2697, 9314, 10135, 207, 8837, 4193, 4318, 7128, 10221, 6352, 3516, 3611, 5467, 1027, 7161, 2263, 4086, 3398, 817, 1839, 3717, 10257, 3570, 60560, 4835, 4856, 84466, 2247, 3600, 5345, 2069, 239, 3569, 4880, 2627, 23414, 7124, 5739, 5468, 7472, 7015, 2303, 3592, 7434, 2066, 5950
GO:0034765	regulation of ion transmembrane transport	GOBP	362	yes	-0.0826343	0.920688	0.00720043	0.042021	down	483, 375, 1192, 801, 9368, 7417, 4283, 2697, 29979, 207, 4318, 1739, 11151, 10105, 9446, 88, 65268, 6844, 1536, 817, 27075, 57620, 6717, 1756, 81831, 4644, 5142, 8514, 338440, 10345, 55636, 9424, 1193, 6588, 9001, 388591, 9472, 782, 3772, 9456, 3749, 84329, 3792, 845, 8645, 486, 6271, 6546, 930, 5294, 89780, 5587, 30818, 54997, 3750, 623, 27092, 65266, 3786, 3762, 23416, 54207, 3779, 3768, 54106,…
GO:0006734	NADH metabolic process	GOBP	30	yes	0.273788	1.31494	0.00720877	0.0420316	up	2597, 226, 7167, 5230, 5223, 4191, 3099, 5214, 5209, 2026, 5208, 5210, 130752
GO:0002526	acute inflammatory response	GOBP	106	yes	-0.124789	0.882684	0.00724408	0.0421992	down	2950, 6774, 3383, 7412, 3572, 53833, 5359, 9536, 2152, 1604, 55061, 1051, 101, 59307, 5627, 3570, 923, 6693, 3426, 1672, 1236, 7292, 727, 730, 2157, 5345, 695, 3569, 3077, 733, 5294, 7124, 2205, 5468, 5199, 2867, 3579, 1268, 8600, 133396, 3818
GO:0043647	inositol phosphate metabolic process	GOBP	77	yes	-0.148524	0.861979	0.00725997	0.0422535	down	801, 3628, 9651, 51477, 5341, 3635, 64768, 113026, 3631, 5333, 3632, 5330, 2247, 27124, 9108
GO:0009060	aerobic respiration	GOBP	72	yes	0.216763	1.24205	0.00727014	0.0422745	up	4191, 3091, 29796, 664, 1737, 8803, 130752
GO:0006959	humoral immune response	GOBP	138	yes	-0.119095	0.887724	0.00728457	0.0423176	down	100423062, 4057, 85236, 3516, 1604, 55061, 596, 5450, 9308, 5627, 931, 8349, 3426, 5650, 1672, 1236, 1880, 5452, 727, 730, 1380, 11326, 84659, 25818, 5133, 1235, 3569, 1755, 940, 733, 4068, 7124, 3574, 54210, 5199, 2208, 10148, 5079, 4049, 8347, 10747
GO:0045665	negative regulation of neuron differentiation	GOBP	174	yes	-0.103057	0.902076	0.00729069	0.0423176	down	396, 2288, 57142, 4193, 5747, 1809, 2932, 6696, 1942, 57534, 7161, 1977, 9139, 4804, 9423, 54910, 9529, 10769, 2309, 3398, 8829, 23189, 57556, 112, 9037, 22902, 23111, 9706, 23108, 28514, 23105, 4038, 8851, 11202, 25791, 30812, 89780, 30012, 223117, 3670, 27124, 2045, 6900, 152330, 2258, 26052, 57715, 57540, 112755, 64843, 7101, 54413, 6532, 9723, 55079
GO:0009896	positive regulation of catabolic process	GOBP	325	yes	0.0993164	1.10442	0.00735498	0.0426523	up	5708, 7879, 10134, 6613, 1075, 2697, 29979, 678, 3091, 207, 7832, 5700, 5045, 4193, 10197, 5747, 8078, 5707, 7128, 25897, 5686, 2932, 127544, 5713, 9517, 10221, 9709, 6653, 5717, 55905, 10558, 93974, 51667, 7133, 1027, 25976, 29763, 5347, 25820, 51529, 1855, 7324, 28951, 101, 5718, 10769, 5716, 64326, 4905, 23163, 29882, 51099, 2719, 3667, 4092, 57690, 79899, 1263, 90865, 115992, 90637, 85409, 10…
GO:0070234	positive regulation of T cell apoptotic process	GOBP	12	yes	-0.237182	0.788847	0.0073861	0.0427942	down	7157, 3620, 3965, 6352, 101, 84524, 5133
GO:0005096	GTPase activator activity	GOMF	281	yes	-0.0922751	0.911854	0.00482989	0.0428561	down	396, 23580, 11135, 397, 29, 7249, 5902, 26000, 192111, 55357, 9322, 5996, 26130, 23092, 64744, 23526, 23102, 201176, 8490, 9743, 9779, 6494, 663, 257106, 79735, 57580, 259173, 9882, 9462, 6001, 51306, 3071, 51291, 408, 1794, 5997, 57514, 10602, 115704, 134957, 23108, 9744, 9459, 57465, 9938, 64333, 64926, 374403, 9901, 8437, 57522, 9732, 117289, 80728, 55188, 8997, 25780, 116986, 55843, 79822, 23…
GO:0001758	retinal dehydrogenase activity	GOMF	9	yes	0.434772	1.54461	0.0048307	0.0428561	up	220, 8644, 8854, 64577
GO:0031665	negative regulation of lipopolysaccharide-mediated signaling pathway	GOBP	6	yes	-0.280975	0.755047	0.00740346	0.0428562	down	4057, 7128, 10221, 59307
GO:0010649	regulation of cell communication by electrical coupling	GOBP	15	yes	0.361754	1.43585	0.0074143	0.0428804	up	801, 817, 6717, 10345, 845, 6546
GO:0048536	spleen development	GOBP	29	yes	-0.18572	0.830506	0.00744376	0.0430121	down	4791, 5585, 10018, 596, 355, 80169, 5308, 56033, 1015
GO:0021872	forebrain generation of neurons	GOBP	47	yes	-0.159731	0.852373	0.00747667	0.0431635	down	6091, 22809, 8650, 2263, 1436, 8829, 6092, 89780, 2624, 6900, 166614, 5629, 1812, 7101, 2066, 1745, 1746, 55079
GO:0002577	regulation of antigen processing and presentation	GOBP	20	yes	-0.209619	0.810893	0.00749793	0.0431745	down	972, 6363, 29108, 7454, 1236, 3077, 6556, 5243
GO:0051384	response to glucocorticoid	GOBP	102	yes	-0.12255	0.884661	0.00750498	0.0431745	down	301, 2950, 6382, 801, 678, 5176, 7332, 21, 114907, 5066, 2309, 596, 5730, 7298, 687, 355, 8061, 4747, 6586, 6770, 6285, 3291, 3569, 3670, 6752, 7124, 2322, 374
GO:0010528	regulation of transposition	GOBP	10	yes	-0.25469	0.775157	0.00751211	0.0431745	down	60489, 200316, 140564, 164668
GO:0010529	negative regulation of transposition	GOBP	10	yes	-0.25469	0.775157	0.00751211	0.0431745	down	60489, 200316, 140564, 164668
GO:0071880	adenylate cyclase-activating adrenergic receptor signaling pathway	GOBP	9	yes	-0.250979	0.778039	0.00760586	0.0436477	down	115, 147
GO:0097296	activation of cysteine-type endopeptidase activity involved in apoptotic signaling pathway	GOBP	13	yes	-0.231867	0.793052	0.00760801	0.0436477	down	8795, 7186, 355, 3717, 356
GO:0005874	microtubule	GOCC	361	yes	0.0865553	1.09041	0.00981275	0.0439107	up	10383, 1778, 801, 7203, 8655, 2288, 79718, 908, 27230, 6950, 10694, 8766, 10749, 7756, 7277, 6249, 84617, 9611, 1739, 80346, 2801, 157922, 58477, 1808, 1781, 23095, 10564, 23332, 5347, 1855, 23623, 3831, 24139, 348235, 4957, 124997, 23160, 140609, 9053, 221035, 51181, 6990, 22911, 7846, 55605, 57662, 6907, 4644, 7461, 55142, 8915, 9654, 403, 9859, 57619, 357, 8514, 642273, 10381, 65983, 51673, 11…
GO:0005732	small nucleolar ribonucleoprotein complex	GOCC	28	yes	0.311897	1.36601	0.00989756	0.0440441	up	1736, 55651, 55505, 10199, 9136
GO:0042749	regulation of circadian sleep/wake cycle	GOBP	11	yes	-0.247621	0.780656	0.00774827	0.0443339	down	8863, 5730, 3569, 3737, 51738
GO:0016445	somatic diversification of immunoglobulins	GOBP	57	yes	-0.158102	0.853763	0.00778293	0.0444532	down	9466, 958, 51010, 9025, 118460, 50943, 7292, 3981, 10538, 1235, 940, 23529, 200558, 30009, 959, 57379
GO:0000177	cytoplasmic exosome (RNase complex)	GOCC	15	yes	0.329096	1.38971	0.0100578	0.04451	up	23016, 23404, 51010, 11340, 118460
GO:0045687	positive regulation of glial cell differentiation	GOBP	24	yes	-0.195608	0.822335	0.00781619	0.0445804	down	6692, 3065, 3572, 7852, 23405, 7161, 3398, 650, 7097, 118738, 23529, 5468
GO:2000516	positive regulation of CD4-positive, alpha-beta T cell activation	GOBP	30	yes	-0.188913	0.827858	0.00785751	0.044754	down	301, 3965, 1604, 6363, 54440, 3071, 9308, 4602, 50943, 7292, 3569, 3594, 51561, 941, 6375
GO:0008360	regulation of cell shape	GOBP	127	yes	-0.112351	0.893731	0.00786465	0.044754	down	226, 301, 9368, 23580, 3383, 56882, 11135, 5747, 1739, 3689, 11151, 54751, 10630, 56990, 2768, 7456, 5764, 1436, 55785, 91010, 51177, 752, 4628, 30011, 7444, 3055, 57619, 2534, 7443, 10602, 3815, 23136, 755, 644150, 2268, 6285, 7940, 11149, 55843, 3569, 10810, 6357, 9723, 57471
GO:0051023	regulation of immunoglobulin secretion	GOBP	13	yes	-0.231321	0.793485	0.00787754	0.044754	down	7009, 7186, 958, 90865, 7292, 3569, 7293, 7124, 959, 5950
GO:0071624	positive regulation of granulocyte chemotaxis	GOBP	23	yes	-0.197895	0.820456	0.00788285	0.044754	down	972, 6278, 5880, 6363, 3071, 1236, 57118, 51561, 3579, 6375
GO:2000514	regulation of CD4-positive, alpha-beta T cell activation	GOBP	41	yes	-0.173052	0.841094	0.00790861	0.0448206	down	301, 51043, 3965, 1604, 6363, 3718, 54440, 3071, 9308, 4602, 3662, 50943, 7292, 3569, 3594, 51561, 941, 6375, 8995
GO:0005978	glycogen biosynthetic process	GOBP	55	yes	0.239463	1.27057	0.00791689	0.0448206	up	5500, 207, 2932, 7360, 2997, 2992, 3667, 5507, 89801, 5167, 648791
GO:0009250	glucan biosynthetic process	GOBP	55	yes	0.239463	1.27057	0.00791689	0.0448206	up	5500, 207, 2932, 7360, 2997, 2992, 3667, 5507, 89801, 5167, 648791
GO:0098739	import across plasma membrane	GOBP	17	yes	-0.218827	0.80346	0.00793106	0.0448614	down	6542, 486, 84679, 389015
GO:0060547	negative regulation of necrotic cell death	GOBP	10	yes	-0.25376	0.775878	0.00795334	0.0449128	down	330
GO:0051968	positive regulation of synaptic transmission, glutamatergic	GOBP	16	yes	-0.218783	0.803496	0.0079541	0.0449128	down	5021, 9378, 1812, 54413
GO:0071385	cellular response to glucocorticoid stimulus	GOBP	39	yes	-0.168668	0.844789	0.00796629	0.0449349	down	301, 2950, 678, 5176, 7332, 114907, 2309, 687, 6770, 3569, 3670, 6752, 2322
GO:0070371	ERK1 and ERK2 cascade	GOBP	221	yes	-0.0943282	0.909984	0.00797199	0.0449349	down	972, 2950, 960, 9368, 3685, 10318, 3383, 11331, 9314, 678, 6278, 27020, 1739, 2889, 3965, 6364, 6352, 4089, 5604, 65268, 3265, 1848, 2263, 5906, 6363, 1436, 29108, 8829, 817, 6237, 10818, 1846, 5156, 408, 650, 4835, 2150, 374403, 1236, 1880, 5734, 2247, 948, 2246, 5345, 26191, 3569, 2047, 246, 168667, 6504, 7124, 2045, 285315, 6357, 5021, 9290, 8600, 285016, 1950, 388325, 6375, 3357, 57105, 2066,…
GO:0034109	homotypic cell-cell adhesion	GOBP	68	yes	-0.143267	0.866522	0.00798234	0.0449367	down	71, 3728, 1192, 1048, 5912, 6352, 3611, 8613, 5341, 114897, 5318, 6812, 83706, 5156, 7301, 80139, 7535, 84466, 23657, 239, 5294, 89780, 2811, 8600, 64805
GO:0060544	regulation of necroptotic process	GOBP	13	yes	-0.247132	0.781037	0.00798627	0.0449367	down	330, 8837
GO:0032635	interleukin-6 production	GOBP	105	yes	-0.124543	0.8829	0.00801178	0.0449929	down	7128, 3965, 5603, 1051, 55773, 29108, 148022, 8692, 3635, 8915, 3071, 408, 7097, 27342, 11213, 3570, 2150, 90865, 10365, 50943, 7292, 7096, 23208, 10333, 948, 197358, 2069, 26191, 3569, 64170, 3670, 29949, 6504, 7124, 51284, 8808, 54106, 1139, 353376, 51738, 3605
GO:0046755	viral budding	GOBP	42	yes	0.296832	1.34559	0.00802422	0.0449929	up	5119, 57132, 9525, 27243, 27183, 51510, 51534, 91782, 25978
GO:1902590	multi-organism organelle organization	GOBP	42	yes	0.296832	1.34559	0.00802422	0.0449929	up	5119, 57132, 9525, 27243, 27183, 51510, 51534, 91782, 25978
GO:1902592	multi-organism membrane budding	GOBP	42	yes	0.296832	1.34559	0.00802422	0.0449929	up	5119, 57132, 9525, 27243, 27183, 51510, 51534, 91782, 25978
GO:1903727	positive regulation of phospholipid metabolic process	GOBP	36	yes	-0.174334	0.840017	0.00804234	0.0450553	down	5747, 7410, 6363, 2321, 5156, 22863, 3667, 3815, 1236, 2247, 2268, 2170, 2322, 3357, 2046
GO:0019932	second-messenger-mediated signaling	GOBP	237	yes	-0.094588	0.909748	0.00807101	0.0451766	down	488, 801, 9368, 10134, 4283, 4915, 7412, 7852, 6364, 4501, 9446, 920, 2770, 5341, 817, 6717, 112, 1756, 916, 1827, 4644, 115, 23564, 90550, 925, 83988, 5997, 10345, 1907, 3708, 1193, 2983, 9455, 8844, 3632, 1234, 1672, 9001, 27040, 9472, 7535, 948, 845, 23551, 79772, 2833, 10411, 695, 6546, 84174, 1235, 63928, 4773, 2205, 5739, 50852, 8600, 51083, 3357, 168620
GO:0060420	regulation of heart growth	GOBP	43	yes	-0.165813	0.847205	0.00808485	0.0452148	down	2697, 3516, 7161, 1848, 2263, 32, 9472, 2247, 2627, 23414, 7472, 5629, 2066, 5950
GO:0042118	endothelial cell activation	GOBP	11	yes	-0.240968	0.785867	0.00813277	0.0454433	down	56892, 4089, 168667
GO:0098799	outer mitochondrial membrane protein complex	GOCC	13	yes	0.357949	1.43039	0.0104042	0.0457901	up	9868, 10452, 401505
GO:0022010	central nervous system myelination	GOBP	10	yes	-0.246612	0.781444	0.00824579	0.0459059	down	7097, 79152, 6900, 3766, 5354
GO:0032291	axon ensheathment in central nervous system	GOBP	10	yes	-0.246612	0.781444	0.00824579	0.0459059	down	7097, 79152, 6900, 3766, 5354
GO:0034661	ncRNA catabolic process	GOBP	26	yes	0.304935	1.35654	0.00825648	0.0459059	up	23016, 23404, 51010, 11340, 118460, 10595
GO:0001960	negative regulation of cytokine-mediated signaling pathway	GOBP	36	yes	-0.175523	0.839018	0.00825836	0.0459059	down	2950, 7850, 6091, 1893, 6352, 5788, 11240, 59307, 27342, 11213, 6586, 2150, 3569, 171392, 5468, 260434, 26228
GO:1902175	regulation of oxidative stress-induced intrinsic apoptotic signaling pathway	GOBP	29	yes	0.287898	1.33362	0.00828847	0.0460335	up	5034, 4170, 29979, 3091, 207, 9529, 23411
GO:0007032	endosome organization	GOBP	66	yes	0.201757	1.22355	0.00830313	0.046047	up	8766, 5119, 9146, 57132, 9525, 27243, 27183, 10564, 51510, 57403, 55004, 51534, 91782, 84313, 25978, 259173, 57617, 8027, 79156, 356
GO:0046033	AMP metabolic process	GOBP	19	yes	0.351154	1.42071	0.0083052	0.046047	up	353, 205, 272, 4907, 122622
GO:0005852	eukaryotic translation initiation factor 3 complex	GOCC	24	yes	0.327735	1.38782	0.0105709	0.0460754	up	8662, 8668, 10480, 8669
GO:0042599	lamellar body	GOCC	18	yes	-0.21777	0.804311	0.0105841	0.0460754	down	7879, 21, 5650, 25818, 6439, 729238, 653509
GO:0008106	alcohol dehydrogenase (NADP+) activity	GOMF	16	yes	0.3538	1.42447	0.00524716	0.0461496	up	51109, 1646, 1645, 8644, 112724, 145226
GO:0001077	transcriptional activator activity, RNA polymerase II core promoter proximal region sequence-specific binding	GOMF	192	yes	-0.101573	0.903415	0.00527223	0.0461496	down	4904, 8626, 6774, 688, 9314, 3659, 3091, 4782, 4609, 4605, 4791, 1052, 5359, 79755, 51043, 2120, 3516, 4089, 7161, 29841, 1051, 1874, 80709, 4774, 7008, 4086, 9915, 4929, 7022, 8061, 3131, 6688, 84662, 4602, 90993, 57593, 51804, 2099, 3662, 2313, 5452, 367, 54345, 10538, 5308, 4603, 253738, 8091, 5324, 2624, 3670, 4773, 7545, 5079, 339488, 2303, 7101, 3195, 7294, 2299
GO:0006505	GPI anchor metabolic process	GOBP	53	yes	0.260984	1.29821	0.0083358	0.0461648	up	54965, 5329, 8818, 80055, 5277, 29880, 284098, 9488, 80157, 2822
GO:0031331	positive regulation of cellular catabolic process	GOBP	263	yes	0.106868	1.11279	0.00837858	0.0463342	up	5708, 10134, 6613, 1075, 29979, 678, 3091, 207, 7832, 5700, 5045, 4193, 10197, 5747, 8078, 5707, 7128, 25897, 5686, 2932, 127544, 5713, 9517, 10221, 9709, 5717, 55905, 10558, 93974, 51667, 7133, 29763, 5347, 25820, 51529, 1855, 7324, 28951, 101, 5718, 10769, 5716, 64326, 29882, 51099, 3667, 4092, 57690, 79899, 1263, 90865, 115992, 90637, 85409, 10411, 144165, 79589, 54941, 7124, 2822, 1950, 225
GO:0071731	response to nitric oxide	GOBP	16	yes	-0.217939	0.804174	0.00839809	0.0463624	down	7186, 6363, 4314, 2983, 1236
GO:0005381	iron ion transmembrane transporter activity	GOMF	13	yes	0.394908	1.48425	0.00536815	0.046678	up	4891, 81894, 7018, 57348
GO:0051132	NK T cell activation	GOBP	9	yes	-0.260136	0.770947	0.00846899	0.0467137	down	64926, 3600, 11314, 51561, 3592
GO:0007189	adenylate cyclase-activating G-protein coupled receptor signaling pathway	GOBP	60	yes	-0.163869	0.848853	0.00848658	0.0467706	down	9368, 5744, 112, 115, 54331, 79924, 5734, 2774, 135, 8698, 5739, 3363, 5732, 1812, 147, 27201
GO:0048634	regulation of muscle organ development	GOBP	103	yes	-0.12478	0.882691	0.00851231	0.0468723	down	2817, 2697, 3516, 4089, 7161, 2263, 596, 6665, 650, 28514, 51804, 9472, 84466, 2247, 6285, 50937, 6474, 22943, 3569, 89780, 2627, 7480, 9099, 23414, 4618, 7472, 2066, 5950
GO:0001522	pseudouridine synthesis	GOBP	24	yes	0.324572	1.38344	0.00853733	0.0469699	up	1736, 55651, 55505, 26995, 80324, 27079
GO:0001708	cell fate specification	GOBP	65	yes	-0.145536	0.864558	0.00856216	0.0470663	down	8543, 3516, 2139, 1848, 8829, 4633, 8324, 51684, 28514, 5727, 63950, 2247, 367, 50937, 54345, 22943, 89780, 30012, 3670, 2138, 8320, 10297, 5460, 64843, 3207
GO:0042345	regulation of NF-kappaB import into nucleus	GOBP	43	yes	-0.163691	0.849004	0.00859553	0.0471692	down	5052, 4792, 9516, 3965, 56892, 7205, 6363, 5716, 7097, 939, 4856, 8809, 51561, 7124, 51284, 10913, 1896, 54106, 8740
GO:0042348	NF-kappaB import into nucleus	GOBP	43	yes	-0.163691	0.849004	0.00859553	0.0471692	down	5052, 4792, 9516, 3965, 56892, 7205, 6363, 5716, 7097, 939, 4856, 8809, 51561, 7124, 51284, 10913, 1896, 54106, 8740
GO:0010720	positive regulation of cell development	GOBP	385	yes	-0.0730546	0.92955	0.00861878	0.0472564	down	1981, 375, 6281, 396, 6692, 55754, 3065, 4915, 8766, 3091, 5176, 3572, 6091, 6249, 1523, 4976, 1382, 27020, 5597, 1809, 2932, 23028, 2889, 7852, 2011, 10221, 3611, 4690, 23405, 54606, 10494, 5604, 7161, 9139, 4804, 29904, 9423, 8650, 1855, 1954, 5906, 5764, 60436, 1435, 3398, 8829, 596, 57556, 57580, 29882, 9037, 22902, 84298, 2534, 4747, 650, 7097, 5753, 90527, 4897, 3815, 1946, 9001, 8437, 9472…
GO:1902850	microtubule cytoskeleton organization involved in mitosis	GOBP	49	yes	0.226851	1.25464	0.00867194	0.0474268	up	8766, 7756, 4605, 5119, 57132, 9525, 27243, 2801, 23332, 51510, 5347, 25978, 114791, 79884
GO:0051056	regulation of small GTPase mediated signal transduction	GOBP	313	yes	-0.0836255	0.919776	0.00875705	0.0478516	down	8878, 396, 389, 6091, 397, 2305, 171177, 29, 7249, 2889, 79109, 5880, 10564, 7410, 9322, 4254, 3265, 23092, 23526, 9743, 19, 9922, 1435, 55785, 6494, 57449, 117178, 817, 54869, 50649, 257106, 23189, 57580, 259173, 50861, 29984, 9462, 23263, 51306, 23268, 51291, 23221, 408, 57514, 27342, 7984, 23108, 55701, 221178, 27128, 9459, 9938, 64333, 2150, 64926, 9901, 286205, 9649, 8437, 7409, 57522, 11728…
GO:0046638	positive regulation of alpha-beta T cell differentiation	GOBP	37	yes	-0.173037	0.841106	0.00880628	0.0480798	down	301, 3965, 4860, 6363, 54440, 3071, 9308, 4602, 50943, 7535, 7292, 3569, 3594, 51561, 941
GO:0015849	organic acid transport	GOBP	151	yes	0.165927	1.18049	0.0088489	0.0482715	up	8140, 6520, 207, 10550, 6509, 5205, 2181, 2180, 6576, 10999, 6542, 8273, 79751, 11309, 1645, 4794, 92745, 11230, 9056, 54896, 1497, 6573, 10560, 55238, 948, 23657, 7504, 2170, 2172, 4948, 6556, 345274, 59272, 388662, 284111, 6506, 201780, 366, 3766, 28234, 6545, 28968
GO:0050804	modulation of synaptic transmission	GOBP	249	yes	-0.0900431	0.913892	0.00887486	0.0483357	down	488, 375, 7532, 10755, 4915, 8766, 8775, 9775, 27020, 5217, 760, 1855, 3265, 4204, 5906, 5764, 10769, 6844, 2770, 29882, 6812, 23154, 6809, 1056, 793, 3815, 9001, 2903, 23373, 9066, 11178, 9294, 3749, 6770, 23208, 6285, 8997, 4684, 22943, 5334, 43, 22941, 6543, 816, 6857, 6616, 6900, 152330, 5021, 1524, 9378, 3766, 7476, 1268, 22997, 1139, 491, 23237, 112755, 56853, 1812, 7101, 54413, 6532, 2914,…
GO:1904816	positive regulation of protein localization to chromosome, telomeric region	GOBP	12	yes	0.365295	1.44094	0.0088864	0.0483532	up	908, 6950, 10694, 1736, 54552
GO:0019068	virion assembly	GOBP	56	yes	0.251006	1.28532	0.00891376	0.048461	up	5861, 5119, 57132, 9525, 27243, 27183, 51510, 51534, 91782, 25978
hsa04742	Taste transduction	KEGG	19	yes	-0.200243	0.818532	0.00930762	0.0485813	down	6337, 112, 6338, 5567, 6340, 5330, 2914, 2784
GO:0021772	olfactory bulb development	GOBP	27	yes	-0.187005	0.82944	0.0089435	0.0485817	down	6091, 22809, 2131, 1808, 1436, 3398, 55636, 6092, 9355, 8320, 7101, 2066, 1746
GO:0045182	translation regulator activity	GOMF	32	yes	0.282005	1.32579	0.00562574	0.048596	up	1978, 10644, 80315, 400961, 10642, 56853, 163255
GO:0042116	macrophage activation	GOBP	51	yes	-0.158355	0.853547	0.00897194	0.0486951	down	972, 727897, 6542, 148022, 23210, 7097, 1907, 4345, 90865, 7535, 7096, 10333, 6556, 51284, 1524, 26228, 133396
GO:0043651	linoleic acid metabolic process	GOBP	17	yes	0.323201	1.38154	0.0089899	0.0487514	up	2950, 64834, 60481, 2180, 50640, 2938, 239, 1573, 59344
GO:0031414	N-terminal protein acetyltransferase complex	GOCC	9	yes	0.374616	1.45443	0.0113378	0.0490897	up	80218, 51126, 60560
GO:0090307	mitotic spindle assembly	GOBP	48	yes	0.227717	1.25573	0.00907175	0.0491539	up	8766, 7756, 4605, 5119, 57132, 9525, 27243, 2801, 23332, 51510, 5347, 25978, 114791, 79884
GO:0042094	interleukin-2 biosynthetic process	GOBP	22	yes	-0.200938	0.817963	0.00908201	0.0491681	down	920, 916, 3902, 3662, 50943, 940, 64170, 941
GO:0002864	regulation of acute inflammatory response to antigenic stimulus	GOBP	10	yes	-0.244893	0.782788	0.00915243	0.0494661	down	53833, 6693, 1236, 695, 2205, 1268
GO:0071548	response to dexamethasone	GOBP	25	yes	-0.19088	0.826231	0.00919592	0.0496468	down	5176, 114907, 2309, 6770, 3569
GO:0001505	regulation of neurotransmitter levels	GOBP	185	yes	-0.105341	0.900018	0.00920128	0.0496468	down	488, 8775, 4128, 5217, 1855, 5906, 6844, 6812, 6809, 145270, 93664, 9256, 94120, 9066, 3749, 8447, 23208, 9899, 2054, 90019, 9900, 43, 2571, 415117, 8938, 6857, 6616, 114088, 8292, 9378, 94122, 3766, 7476, 112755, 1812, 6532, 2914, 341359, 1621, 22999
GO:0038083	peptidyl-tyrosine autophosphorylation	GOBP	45	yes	-0.161445	0.850913	0.00923857	0.0497837	down	5747, 7297, 10188, 3718, 3055, 3717, 2534, 5753, 3932, 7535, 2268, 3702, 695, 640, 7294, 2066
GO:0097485	neuron projection guidance	GOBP	225	yes	-0.094988	0.909384	0.00924213	0.0497837	down	6152, 2817, 5361, 2885, 214, 6091, 5747, 6712, 2131, 6478, 1808, 4089, 1942, 57216, 4756, 4804, 2049, 9423, 54910, 1855, 3265, 1954, 1436, 8829, 57556, 4628, 9037, 4147, 2534, 10381, 10752, 5797, 4897, 6586, 10154, 1946, 8851, 6477, 494470, 4684, 23114, 6092, 9355, 2047, 23767, 7976, 89780, 9048, 223117, 3670, 2045, 658, 6900, 152330, 9378, 627, 3800, 57715, 10570, 140883, 64843, 6585, 1002, 9723…
GO:0030877	beta-catenin destruction complex	GOCC	17	yes	0.331852	1.39355	0.0115804	0.0498706	up	2932, 6477, 10297, 8601
GO:0015078	hydrogen ion transmembrane transporter activity	GOMF	110	yes	0.180785	1.19816	0.00587838	0.0499695	up	518, 56901, 523, 10476, 533, 9550, 9114, 29796, 51606, 4891, 125965, 84679, 6556, 245973, 389015, 525
GO:0001228	transcriptional activator activity, RNA polymerase II transcription regulatory region sequence-specific binding	GOMF	275	yes	-0.088732	0.915091	0.00589562	0.0499695	down	4904, 8626, 6774, 688, 3159, 9314, 3659, 3091, 4782, 4609, 4605, 7157, 22809, 4791, 1052, 5359, 79755, 51043, 4790, 2120, 3516, 4094, 4089, 57822, 7161, 29841, 1051, 1874, 80709, 5083, 3660, 4774, 7008, 4086, 2309, 9915, 4929, 7022, 7227, 7975, 8061, 3131, 6688, 84662, 4602, 90993, 8538, 57593, 51804, 2099, 3662, 2313, 5452, 367, 54345, 10538, 5308, 58495, 56033, 4603, 253738, 8091, 5324, 2624, 2…
GO:0015036	disulfide oxidoreductase activity	GOMF	31	yes	0.299124	1.34868	0.00589891	0.0499695	up	2923, 7295, 9446, 54431, 51060, 25828, 80142, 51218, 119391
GO:0044766	multi-organism transport	GOBP	71	yes	0.192508	1.21229	0.00936025	0.0503358	up	7879, 5901, 6950, 3838, 3840, 3836, 10189, 9688, 79902, 3839, 79023, 9397, 402569
GO:1902579	multi-organism localization	GOBP	71	yes	0.192508	1.21229	0.00936025	0.0503358	up	7879, 5901, 6950, 3838, 3840, 3836, 10189, 9688, 79902, 3839, 79023, 9397, 402569
GO:0038127	ERBB signaling pathway	GOBP	158	yes	0.138699	1.14878	0.00940338	0.0504949	up	3320, 1173, 7879, 11140, 2885, 207, 5747, 4318, 6464, 9146, 84985, 5829, 5641, 1175, 3516, 9564, 5295, 3265, 9052, 5329, 1839, 10551, 30011, 9770, 5795, 8027, 5753, 9001, 1796, 2069, 356, 145957, 1950, 2066, 6456, 374, 255324
GO:0043173	nucleotide salvage	GOBP	12	yes	0.363774	1.43875	0.00940553	0.0504949	up	353, 3251, 272, 7378
GO:0030534	adult behavior	GOBP	110	yes	-0.11686	0.88971	0.00945336	0.0507094	down	6712, 4204, 3398, 4929, 221935, 55636, 10752, 26047, 9455, 1497, 9456, 2906, 8997, 53616, 84189, 91978, 22941, 2019, 85446, 6900, 7545, 5079, 6506, 9378, 3766, 1139, 1812, 54413, 23544, 1137, 51738, 1621, 57578, 2917
GO:0016765	transferase activity, transferring alkyl or aryl (other than methyl) groups	GOMF	85	yes	0.229075	1.25744	0.00603285	0.0507765	up	2950, 2222, 2224, 6611, 9446, 116150, 6723, 8540, 5875, 2938, 4257, 2954, 2948, 5229, 119391, 23590, 4143, 4056
GO:0042535	positive regulation of tumor necrosis factor biosynthetic process	GOBP	10	yes	-0.244307	0.783247	0.00947867	0.0508028	down	1536, 6693, 7096, 729230
GO:0052742	phosphatidylinositol kinase activity	GOMF	47	yes	-0.174499	0.839878	0.00611867	0.0509617	down	2885, 8503, 5295, 2263, 8394, 472, 10818, 5293, 3667, 2247, 2246, 5294, 9365, 54106, 5288
GO:0004128	cytochrome-b5 reductase activity, acting on NAD(P)H	GOMF	11	yes	0.414748	1.51399	0.00617129	0.0509617	up	5447, 1728, 51700, 51167, 606495
GO:0051087	chaperone binding	GOMF	73	yes	0.198528	1.21961	0.00625652	0.0511598	up	1075, 10963, 11140, 9531, 7157, 7450, 573, 10598, 3336, 267, 54431, 1027, 10294, 9529, 55466, 80273, 26278, 25822, 388591
GO:0016667	oxidoreductase activity, acting on a sulfur group of donors	GOMF	61	yes	0.244277	1.2767	0.00627321	0.0511598	up	2923, 7295, 64359, 58472, 9446, 54431, 51060, 25828, 84817, 140809, 80142, 51218, 119391
hsa00052	Galactose metabolism	KEGG	22	yes	0.323162	1.38149	0.0100443	0.0511779	up	3099, 5214, 7360, 8704, 2582, 2717, 2585
GO:0071622	regulation of granulocyte chemotaxis	GOBP	35	yes	-0.173404	0.840798	0.00955893	0.0511795	down	972, 6278, 6352, 5880, 6363, 1435, 3071, 1236, 57118, 51561, 3579, 6375, 8995
GO:0002438	acute inflammatory response to antigenic stimulus	GOBP	16	yes	-0.215881	0.805831	0.00956533	0.0511795	down	3383, 53833, 923, 6693, 1236, 695, 2205, 3579, 1268, 133396
GO:0002707	negative regulation of lymphocyte mediated immunity	GOBP	29	yes	-0.190259	0.826745	0.00957908	0.0511795	down	53833, 3965, 5788, 6318, 56940, 6693, 50943, 10225, 3575, 3077, 6504, 6375
GO:0003002	regionalization	GOBP	298	yes	-0.0816329	0.92161	0.00958075	0.0511795	down	8626, 7832, 10006, 3516, 4089, 57534, 57216, 7528, 1954, 1848, 2263, 59343, 79971, 84678, 441478, 8829, 5075, 472, 10818, 4188, 80055, 7026, 5567, 2719, 51684, 650, 6045, 51098, 28514, 26160, 65057, 9742, 92, 200894, 4038, 79809, 57728, 80199, 5727, 63950, 23432, 54806, 367, 79600, 50937, 2246, 5308, 201164, 23242, 55329, 58495, 22943, 56033, 286204, 9355, 5125, 89780, 3223, 84976, 8854, 3670, 32…
GO:0035914	skeletal muscle cell differentiation	GOBP	56	yes	-0.149256	0.861349	0.00959596	0.0512182	down	688, 2817, 7832, 9328, 9318, 59269, 3131, 51804, 8819, 63950, 84466, 6285, 50937, 27063, 30812, 115509, 89780, 4618, 8320, 5079, 26287, 5081
GO:0001931	uropod	GOCC	12	yes	-0.228965	0.795356	0.0120652	0.0514057	down	6404, 6693, 9051, 3384, 388325
GO:0031254	cell trailing edge	GOCC	12	yes	-0.228965	0.795356	0.0120652	0.0514057	down	6404, 6693, 9051, 3384, 388325
GO:0006835	dicarboxylic acid transport	GOBP	70	yes	-0.145608	0.864496	0.00965411	0.0514859	down	10755, 4915, 10550, 1808, 2744, 6844, 79751, 6812, 11230, 27165, 89874, 115019, 9256, 6573, 55238, 23657, 6857, 6616, 284111, 6506, 10861, 22999, 2917
GO:0000462	maturation of SSU-rRNA from tricistronic rRNA transcript (SSU-rRNA, 5.8S rRNA, LSU-rRNA)	GOBP	40	yes	0.248881	1.28259	0.00968453	0.0515805	up	88745, 10436, 27042, 705
GO:0043124	negative regulation of I-kappaB kinase/NF-kappaB signaling	GOBP	50	yes	-0.15404	0.857237	0.00968787	0.0515805	down	2950, 4792, 10318, 9516, 7128, 7205, 5187, 5716, 29108, 23411, 22900, 2099, 939, 4856, 197358, 399, 8740
GO:0007193	adenylate cyclase-inhibiting G-protein coupled receptor signaling pathway	GOBP	51	yes	-0.164522	0.848299	0.00971065	0.0516591	down	2773, 5996, 2770, 112, 115, 1903, 2550, 2774, 6752, 2781, 768239, 4987, 2914, 3357, 64805, 2917
GO:0043248	proteasome assembly	GOBP	15	yes	0.33964	1.40444	0.00979114	0.0520117	up	7979, 5717, 51371, 5716, 8624, 389362
GO:0031396	regulation of protein ubiquitination	GOBP	255	yes	0.108527	1.11463	0.0097931	0.0520117	up	3320, 5708, 330, 29979, 5700, 7332, 10197, 5747, 5707, 7128, 5686, 23028, 64359, 5713, 55611, 6478, 9709, 5717, 7334, 9683, 5347, 1025, 51529, 54602, 7324, 59343, 23560, 9529, 5718, 5716, 148022, 54165, 57599, 54552, 29882, 8915, 201254, 2534, 51684, 408, 4092, 84259, 7965, 26232, 10196, 165324, 91947, 55869, 23551, 123879, 26191, 144165, 3077, 85453, 286151, 1950, 5582
GO:0006957	complement activation, alternative pathway	GOBP	11	yes	-0.243744	0.783689	0.00980146	0.0520132	down	727, 730, 11326, 733, 5199
GO:0046364	monosaccharide biosynthetic process	GOBP	86	yes	0.187807	1.2066	0.00981947	0.0520659	up	2597, 226, 7167, 5230, 7086, 5223, 4191, 10776, 2806, 2820, 6652, 6576, 2026, 51363, 84649, 3569, 5105, 5950
GO:0017146	NMDA selective glutamate receptor complex	GOCC	11	yes	-0.246186	0.781777	0.0124214	0.0523662	down	2903, 2906
GO:0009301	snRNA transcription	GOBP	72	yes	0.195023	1.21534	0.00990721	0.0524016	up	22916, 22936, 1025, 4686, 5437, 8812, 5432, 2958, 26512, 55726, 5452, 84524
GO:0042795	snRNA transcription from RNA polymerase II promoter	GOBP	71	yes	0.195023	1.21534	0.00990721	0.0524016	up	22916, 22936, 1025, 4686, 5437, 8812, 5432, 2958, 26512, 55726, 5452, 84524
GO:0008589	regulation of smoothened signaling pathway	GOBP	61	yes	-0.147862	0.86255	0.00993254	0.0524544	down	5396, 5447, 2263, 916, 5567, 2719, 51684, 84662, 26160, 9742, 2121, 79809, 80199, 5727, 23432, 79600, 6474, 84976, 7545
GO:0045954	positive regulation of natural killer cell mediated cytotoxicity	GOBP	17	yes	-0.219073	0.803263	0.00993349	0.0524544	down	5817, 3902, 7409, 114836, 4068, 56253, 10666, 259197, 3592
GO:0070252	actin-mediated cell contraction	GOBP	91	yes	0.178727	1.19569	0.0099702	0.0525189	up	3728, 7171, 7170, 1674, 58, 2697, 4703, 4620, 4604, 70, 88, 4606, 4625, 4632, 817, 4633, 6717, 1756, 140465, 5318, 7136, 5142, 7134, 388591, 4634, 7139, 55800, 7137
GO:0019003	GDP binding	GOMF	49	yes	0.231166	1.26007	0.00648662	0.0525737	up	375, 7879, 5901, 2773, 5878, 5912, 22931, 5899, 57403, 6729, 2770, 6237, 57826, 403, 2669, 5105, 64284
GO:0043020	NADPH oxidase complex	GOCC	13	yes	-0.239349	0.78714	0.012617	0.0529121	down	1536, 4689, 124056, 10811, 653361, 654817, 654816
GO:0090305	nucleic acid phosphodiester bond hydrolysis	GOBP	276	yes	0.103618	1.10918	0.0100738	0.0530215	up	7009, 3005, 5425, 3836, 22916, 55651, 23405, 9797, 53981, 246175, 4686, 57804, 27301, 167227, 88745, 80153, 23052, 54840, 54913, 10248, 80055, 23016, 23404, 1478, 64782, 10898, 25996, 65080, 51010, 1774, 5168, 404672, 11340, 112479, 246243, 440400, 6039, 6038, 10799, 201164, 84659, 563, 1677, 340152, 5167, 200558, 84072, 8909, 10595, 144715, 56164
GO:0034587	piRNA metabolic process	GOBP	10	yes	-0.249739	0.779004	0.0101075	0.0531552	down	11022, 201164, 143689, 9271
GO:0021879	forebrain neuron differentiation	GOBP	40	yes	-0.163847	0.848872	0.0101742	0.0534623	down	6091, 22809, 2263, 1436, 8829, 6092, 2624, 6900, 166614, 5629, 1812, 2066, 1745, 1746, 55079
GO:0042759	long-chain fatty acid biosynthetic process	GOBP	11	yes	0.361354	1.43527	0.0102803	0.053976	up	6319, 79966, 4644, 79071, 239, 246, 59344, 5354
GO:0006167	AMP biosynthetic process	GOBP	12	yes	0.417783	1.51859	0.0102901	0.0539832	up	353, 122622
GO:0019080	viral gene expression	GOBP	181	yes	0.120994	1.12862	0.010328	0.0541378	up	6152, 6165, 11224, 8662, 3065, 5045, 81603, 6352, 1025, 9688, 5437, 79902, 5432, 81559, 79023, 8091, 11074
GO:0005234	extracellular-glutamate-gated ion channel activity	GOMF	12	yes	-0.241946	0.785099	0.00682945	0.0544303	down	2568, 2903, 2906
GO:0004497	monooxygenase activity	GOMF	119	yes	-0.150243	0.860499	0.00684112	0.0544303	down	5066, 6307, 1595, 26002, 1593, 1646, 64780, 260293, 1545, 1645, 8644, 1580, 285440, 1571, 66002, 9420, 1573, 1594, 1583, 126410, 54905, 199974, 1621
GO:0052650	NADP-retinol dehydrogenase activity	GOMF	9	yes	0.399739	1.49144	0.00688152	0.0544303	up	51109, 8644, 112724, 145226
GO:0045732	positive regulation of protein catabolic process	GOBP	260	yes	0.105769	1.11156	0.010408	0.0545129	up	5708, 7879, 10134, 6613, 1075, 2697, 29979, 207, 5700, 5045, 4193, 10197, 5747, 8078, 5707, 7128, 25897, 5686, 2932, 127544, 5713, 10221, 9709, 6653, 5717, 55905, 93974, 51667, 7133, 1027, 25976, 29763, 5347, 25820, 51529, 1855, 7324, 28951, 101, 5718, 10769, 5716, 64326, 4905, 23163, 29882, 2719, 4092, 1263, 90865, 115992, 90637, 85409, 144165, 79589, 54941, 7124, 140462, 10297, 85407, 2822, 1950
GO:0036159	inner dynein arm assembly	GOBP	9	yes	-0.249157	0.779458	0.0104547	0.0546853	down	25981, 23639, 51364, 56171, 27285
GO:0019373	epoxygenase P450 pathway	GOBP	10	yes	-0.256516	0.773743	0.0104579	0.0546853	down	2053, 1545, 1571, 66002, 1573
GO:0000463	maturation of LSU-rRNA from tricistronic rRNA transcript (SSU-rRNA, 5.8S rRNA, LSU-rRNA)	GOBP	11	yes	0.36981	1.44746	0.0104942	0.0548305	up	11224, 23481, 23560, 55759
GO:0042269	regulation of natural killer cell mediated cytotoxicity	GOBP	27	yes	-0.188831	0.827926	0.0105085	0.0548583	down	3965, 6318, 5817, 3902, 7409, 114836, 4068, 56253, 146850, 10666, 259197, 3592
GO:0002579	positive regulation of antigen processing and presentation	GOBP	14	yes	-0.22222	0.800739	0.010518	0.0548583	down	972, 6363, 29108, 1236, 6556, 5243
GO:1902017	regulation of cilium assembly	GOBP	30	yes	-0.182527	0.833162	0.0105251	0.0548583	down	64422, 153241, 115704, 55835, 9742, 9662, 9001, 80199, 79734, 55329, 8100, 23329, 4117
GO:0042493	response to drug	GOBP	329	yes	-0.0754066	0.927366	0.0105573	0.0549817	down	301, 3320, 999, 6774, 55754, 3065, 80781, 3383, 4502, 4609, 7157, 4193, 3157, 7082, 6730, 4646, 70, 5447, 21, 5066, 10682, 5205, 1808, 6652, 1027, 2180, 7161, 4860, 7372, 7515, 25828, 1025, 20, 2768, 1848, 1317, 5906, 5764, 205, 19, 6729, 1536, 23492, 4837, 7508, 11044, 596, 7298, 8061, 3071, 2534, 5142, 5860, 55270, 4257, 10257, 5888, 3932, 5797, 6565, 1580, 32, 2903, 1571, 5727, 122622, 6573, 6…
GO:0004549	tRNA-specific ribonuclease activity	GOMF	16	yes	0.340162	1.40517	0.00699783	0.0550189	up	54913, 10248, 10799
GO:0016328	lateral plasma membrane	GOCC	44	yes	0.221459	1.2479	0.0132512	0.0552823	up	3728, 301, 4070, 999, 2706, 2697, 23603, 1739, 2011, 5310, 57216, 1855, 1828, 1756, 9069, 85409, 11149, 7976, 525
GO:0048469	cell maturation	GOBP	127	yes	-0.108885	0.896834	0.0106439	0.0553649	down	2697, 3091, 4976, 2932, 23028, 84283, 4204, 6363, 2309, 3398, 4929, 596, 7298, 558, 1203, 4897, 26047, 9985, 1672, 10365, 5452, 3600, 54345, 2069, 10481, 23114, 201164, 695, 30812, 6663, 1235, 5979, 4880, 2624, 5468, 6900, 5991, 30819, 51083, 2046, 168620, 79820, 5354
GO:0032196	transposition	GOBP	11	yes	-0.242332	0.784796	0.0106481	0.0553649	down	60489, 200316, 140564, 164668
GO:0030501	positive regulation of bone mineralization	GOBP	31	yes	-0.176773	0.83797	0.0106569	0.0553661	down	4057, 91461, 650, 92, 6546, 7480, 658, 9365
GO:0005885	Arp2/3 protein complex	GOCC	13	yes	0.350519	1.4198	0.0135334	0.0555689	up	10552, 81873, 653857
GO:0031968	organelle outer membrane	GOCC	191	yes	0.12113	1.12877	0.0135389	0.0555689	up	4170, 3429, 7417, 11331, 2697, 518, 3099, 4976, 340061, 9868, 10452, 4128, 23788, 10280, 192111, 2181, 1717, 2180, 80777, 10204, 8303, 10018, 55669, 401505, 5366, 4891, 596, 10651, 664, 345778, 23111, 666, 4257, 23175, 32, 6843, 201164, 6663, 126129, 1594, 23098, 23305, 10017, 4056, 55340
GO:0033177	proton-transporting two-sector ATPase complex, proton-transporting domain	GOCC	20	yes	0.292834	1.34022	0.0135974	0.0555689	up	518, 10476, 533, 9114, 9551
GO:0006626	protein targeting to mitochondrion	GOBP	146	yes	0.142437	1.15308	0.0107125	0.0556099	up	3320, 7332, 4604, 86, 9868, 10452, 9520, 59286, 8607, 93974, 5880, 55486, 23203, 401505, 100287932, 10440, 79778, 10651, 345778, 80273, 131118, 26521, 1459, 27165, 4285, 84224, 3305, 84327, 8999, 23409
GO:0030011	maintenance of cell polarity	GOBP	13	yes	-0.226246	0.797522	0.0107667	0.0558256	down	3071, 146206, 286204, 9355
GO:0021522	spinal cord motor neuron differentiation	GOBP	23	yes	-0.195624	0.822321	0.0107714	0.0558256	down	8543, 51684, 26160, 5727, 79600, 81544, 3670, 64843
GO:0033628	regulation of cell adhesion mediated by integrin	GOBP	40	yes	-0.165673	0.847323	0.0107977	0.0559171	down	5747, 6352, 1942, 5420, 1545, 83706, 3071, 9404, 7535, 5979, 5294, 54997, 2303, 2046
GO:0060396	growth hormone receptor signaling pathway	GOBP	23	yes	-0.206985	0.813032	0.0108495	0.05614	down	6774, 5747, 5829, 5295, 6776, 3718, 3717, 8835, 5618, 51738
GO:0042063	gliogenesis	GOBP	214	yes	-0.091097	0.912929	0.0109421	0.0565737	down	301, 2950, 928, 4323, 6774, 2817, 6692, 3065, 57142, 4915, 207, 3572, 7852, 4501, 1031, 3611, 23405, 5604, 7161, 8613, 5803, 5764, 1967, 1435, 3398, 1021, 4147, 666, 650, 7097, 79885, 8891, 28514, 90865, 1880, 8851, 6285, 118738, 79152, 53616, 79006, 30812, 6663, 4613, 5324, 10810, 23529, 5453, 5468, 729230, 6900, 4049, 3766, 92737, 26228, 7015, 1812, 7101, 54413, 1745, 1746, 374, 64805, 5354
GO:0008287	protein serine/threonine phosphatase complex	GOCC	55	yes	0.217957	1.24353	0.0139883	0.0565889	up	5500, 54205, 5531, 5514, 5527, 4690, 6992, 5525, 5523, 5529, 29966, 3708, 57718, 85407
GO:1903293	phosphatase complex	GOCC	55	yes	0.217957	1.24353	0.0139883	0.0565889	up	5500, 54205, 5531, 5514, 5527, 4690, 6992, 5525, 5523, 5529, 29966, 3708, 57718, 85407
GO:2001269	positive regulation of cysteine-type endopeptidase activity involved in apoptotic signaling pathway	GOBP	17	yes	-0.210109	0.810496	0.0109765	0.0567063	down	8795, 3965, 7186, 355, 3717, 356
GO:0007411	axon guidance	GOBP	223	yes	-0.0933433	0.910881	0.0110185	0.0568773	down	6152, 2817, 5361, 2885, 214, 6091, 5747, 6712, 2131, 6478, 1808, 4089, 1942, 57216, 4756, 4804, 2049, 9423, 54910, 1855, 3265, 1954, 1436, 8829, 57556, 4628, 9037, 4147, 2534, 10381, 10752, 5797, 4897, 6586, 10154, 1946, 8851, 6477, 494470, 4684, 23114, 6092, 9355, 2047, 23767, 7976, 89780, 9048, 223117, 3670, 2045, 658, 6900, 152330, 9378, 627, 3800, 57715, 140883, 64843, 6585, 1002, 9723, 2046,…
GO:0072539	T-helper 17 cell differentiation	GOBP	13	yes	-0.23059	0.794065	0.0110631	0.0570618	down	3662, 50943, 114836, 10538, 3569, 3594, 51561, 4063, 8995
GO:0035058	nonmotile primary cilium assembly	GOBP	28	yes	-0.183747	0.832146	0.0110721	0.0570627	down	5108, 57216, 582, 55835, 9662, 200894, 9001, 23116, 80199, 4117
GO:0010181	FMN binding	GOMF	14	yes	0.352723	1.42294	0.00730323	0.0570782	up	5447, 27158, 55163, 1723, 200407
GO:0052866	phosphatidylinositol phosphate phosphatase activity	GOMF	47	yes	-0.190281	0.826727	0.00740697	0.0575465	down	3635, 200576, 8776, 3631, 27124, 9108
GO:0043094	cellular metabolic compound salvage	GOBP	59	yes	0.259262	1.29597	0.0111825	0.0575856	up	8566, 353, 4860, 51816, 4507, 3251, 272, 7378, 161823, 978, 635
GO:0005200	structural constituent of cytoskeleton	GOMF	92	yes	0.174239	1.19034	0.00746639	0.0576669	up	3861, 71, 3868, 3854, 10383, 5493, 1674, 58, 7277, 6712, 84617, 2036, 2037, 7846, 1756, 4747, 10381, 64097, 114791, 7280, 23136, 4741, 3849, 631, 3857, 3890
GO:0000178	exosome (RNase complex)	GOCC	38	yes	0.281875	1.32561	0.0144554	0.0577392	up	23016, 23404, 51010, 11340, 10438, 118460, 57379
GO:1905354	exoribonuclease complex	GOCC	38	yes	0.281875	1.32561	0.0144554	0.0577392	up	23016, 23404, 51010, 11340, 10438, 118460, 57379
GO:0005777	peroxisome	GOCC	181	yes	0.141276	1.15174	0.0146176	0.0577392	up	375, 7086, 224, 340061, 6342, 2181, 9665, 2180, 3422, 8540, 84263, 83752, 50640, 2053, 4644, 51015, 4257, 9409, 390916, 144811, 9066, 5191, 8800, 1428, 23305, 225, 255027
GO:0042579	microbody	GOCC	181	yes	0.141276	1.15174	0.0146176	0.0577392	up	375, 7086, 224, 340061, 6342, 2181, 9665, 2180, 3422, 8540, 84263, 83752, 50640, 2053, 4644, 51015, 4257, 9409, 390916, 144811, 9066, 5191, 8800, 1428, 23305, 225, 255027
GO:0031672	A band	GOCC	31	yes	0.251963	1.28655	0.014633	0.0577392	up	226, 4620, 4619, 4660, 5525, 4633, 127294, 442721, 8736, 23676, 6271, 4634
GO:0015844	monoamine transport	GOBP	57	yes	-0.155163	0.856276	0.0112302	0.0577847	down	4204, 2205, 5021, 1268, 1139, 3737, 1812, 8973, 6532, 6530, 1137, 64805
GO:0010498	proteasomal protein catabolic process	GOBP	462	yes	0.0814482	1.08486	0.0112657	0.0578748	up	5708, 10134, 6613, 5887, 79718, 153830, 10755, 54461, 5886, 29979, 55666, 207, 5700, 7157, 4193, 7328, 10197, 8078, 5707, 25897, 550, 5686, 6386, 55968, 2932, 127544, 5713, 10221, 54926, 6478, 9709, 22838, 5717, 55905, 5310, 7319, 5527, 9683, 9616, 267, 51667, 54431, 90135, 5347, 369, 25820, 51529, 2768, 83892, 200933, 1855, 899, 7324, 28951, 9529, 54442, 5718, 10769, 54476, 5716, 5366, 64326, 91…
GO:0004983	neuropeptide Y receptor activity	GOMF	4	yes	0.523099	1.68725	0.00754371	0.0579233	up	84109
GO:0036293	response to decreased oxygen levels	GOBP	281	yes	-0.0815975	0.921643	0.0112975	0.0579708	down	5034, 7009, 4323, 824, 51142, 3383, 7412, 29979, 3091, 207, 7157, 4193, 5327, 5352, 7852, 9520, 7351, 2113, 26355, 3516, 5066, 4089, 5058, 5467, 1027, 7515, 25828, 1978, 29904, 4204, 5764, 57085, 101, 3163, 1536, 5366, 2309, 9915, 4929, 596, 817, 472, 664, 80315, 650, 7097, 23411, 3708, 1263, 285, 5579, 114757, 6285, 27063, 3291, 6546, 126374, 4880, 2627, 5105, 3779, 5021, 4049, 1139, 7015, 6532,…
GO:0097530	granulocyte migration	GOBP	98	yes	-0.124781	0.88269	0.0113024	0.0579708	down	972, 301, 6278, 3689, 6364, 6352, 5880, 101, 6363, 1435, 57580, 5293, 3071, 5142, 1907, 1236, 5734, 120425, 7409, 57118, 11314, 6283, 5294, 51561, 54210, 6357, 3579, 6375, 6846, 8995, 10344
GO:0032623	interleukin-2 production	GOBP	57	yes	-0.146007	0.864152	0.0113442	0.0580835	down	301, 53833, 7128, 7186, 4860, 920, 916, 54440, 5142, 9308, 3902, 3662, 50943, 7292, 11326, 79679, 940, 64170, 6556, 729230, 941, 6375
GO:0097286	iron ion import	GOBP	12	yes	0.35861	1.43134	0.011348	0.0580835	up	4891, 79689, 7018, 3077
GO:0007611	learning or memory	GOBP	176	yes	-0.097585	0.907025	0.0113514	0.0580835	down	4915, 3091, 5176, 7832, 25946, 9775, 27020, 267, 8704, 1051, 5803, 4204, 5764, 10769, 4891, 23259, 8061, 2534, 4835, 793, 26047, 3815, 1497, 2903, 23373, 11202, 6285, 7122, 5577, 10396, 8997, 22943, 80823, 22941, 6543, 2019, 6616, 6900, 54207, 5021, 2258, 1524, 9378, 1268, 1139, 8516, 23237, 1812, 54413, 6532, 25769, 5582, 1621, 81832, 2917
GO:0021988	olfactory lobe development	GOBP	28	yes	-0.18132	0.834168	0.0113779	0.058173	down	6091, 22809, 2131, 1808, 1436, 3398, 55636, 6092, 9355, 8320, 7101, 2066, 1746
GO:0048524	positive regulation of viral process	GOBP	101	yes	0.163085	1.17714	0.0113888	0.0581822	up	5034, 1072, 7879, 5886, 5479, 9525, 27243, 3965, 6352, 6732, 27183, 90120, 1025, 5437, 5432, 7113, 25978, 6733, 81559, 940
GO:0045408	regulation of interleukin-6 biosynthetic process	GOBP	13	yes	-0.225232	0.798331	0.0114332	0.0583165	down	1051, 3635, 7096, 10333, 2069, 64170, 51738
GO:0021953	central nervous system neuron differentiation	GOBP	135	yes	-0.10832	0.897341	0.0114811	0.0584682	down	4915, 8543, 7832, 6091, 22809, 5747, 2049, 200933, 2263, 1436, 4929, 8829, 3251, 51684, 26160, 5727, 266727, 79600, 6092, 22943, 81544, 2047, 89780, 2624, 3670, 7472, 8320, 6900, 166614, 7476, 491, 64843, 5629, 5081, 1812, 7101, 2066, 1745, 1746, 55079
GO:0021871	forebrain regionalization	GOBP	16	yes	-0.212879	0.808254	0.0114954	0.0584947	down	80055, 650, 79809, 63950, 9355, 8320, 55079
hsa05010	Alzheimer's disease	KEGG	154	yes	0.128463	1.13708	0.0117582	0.0585175	up	2597, 488, 801, 824, 518, 56901, 54205, 7132, 4710, 10476, 2932, 4711, 4719, 29796, 489, 4702, 55967, 355, 8883, 4731, 4718, 3708, 2903, 5330, 8851, 2906, 4311, 6263, 125965, 63928, 7124, 778
GO:1902667	regulation of axon guidance	GOBP	41	yes	-0.16612	0.846945	0.0115147	0.0585366	down	5361, 54910, 1954, 8829, 57556, 9037, 10154, 89780, 223117, 57715, 9723, 55079
GO:0046685	response to arsenic-containing substance	GOBP	25	yes	0.279079	1.32191	0.0115218	0.0585366	up	5176, 10105, 9446, 1371, 4747, 7390, 90637, 119391
GO:0000276	mitochondrial proton-transporting ATP synthase complex, coupling factor F(o)	GOCC	9	yes	0.366705	1.44297	0.0149194	0.0585806	up	518, 10476, 9551
GO:0002455	humoral immune response mediated by circulating immunoglobulin	GOBP	32	yes	-0.175507	0.839032	0.0115737	0.0586291	down	100423062, 1604, 55061, 3426, 727, 730, 1380, 733, 7124, 2208, 4049, 10747
GO:0000054	ribosomal subunit export from nucleus	GOBP	10	yes	0.367075	1.44351	0.0115764	0.0586291	up	5901, 51068, 84946
GO:0033750	ribosome localization	GOBP	10	yes	0.367075	1.44351	0.0115764	0.0586291	up	5901, 51068, 84946
GO:0033753	establishment of ribosome localization	GOBP	10	yes	0.367075	1.44351	0.0115764	0.0586291	up	5901, 51068, 84946
GO:0014902	myotube differentiation	GOBP	84	yes	-0.127089	0.880655	0.0116789	0.0591017	down	4323, 824, 58, 1048, 4283, 8837, 2932, 10938, 55544, 963, 596, 51177, 9149, 79365, 8538, 9518, 51804, 4856, 57462, 9456, 2323, 50937, 3792, 9750, 6474, 5308, 7504, 7480, 4773, 4618, 493829, 26287, 8740, 92737, 3756, 4868, 168620
GO:0016075	rRNA catabolic process	GOBP	17	yes	0.321717	1.37949	0.0117468	0.0593983	up	23016, 23404, 51010, 11340, 118460, 10595
GO:0098687	chromosomal region	GOCC	377	yes	0.0881352	1.09214	0.0152454	0.0595686	up	2547, 10728, 5500, 8655, 23468, 7756, 6249, 23028, 5514, 10189, 5527, 55651, 84516, 23332, 23347, 8520, 1051, 5347, 170506, 55226, 5525, 348235, 79902, 124997, 5000, 23160, 23047, 6990, 55055, 55320, 55506, 472, 9770, 201254, 7517, 10320, 283489, 10910, 7014, 79023, 7405, 79991, 5888, 80169, 9025, 65057, 9183, 9985, 3981, 401541, 201161, 1780, 7015
GO:0035250	UDP-galactosyltransferase activity	GOMF	33	yes	0.296182	1.34471	0.00784186	0.0598625	up	84002, 8702, 8704, 8703, 10331, 7368, 93010, 9331, 10317, 79369, 8707
GO:0005884	actin filament	GOCC	80	yes	0.167635	1.18251	0.0154029	0.059892	up	71, 7171, 5358, 2017, 58, 3936, 1809, 4646, 70, 11151, 2011, 88, 5880, 5058, 7456, 57617, 4644, 3055, 2534, 92241, 644150, 442721, 23242, 54857, 10297
GO:0030594	neurotransmitter receptor activity	GOMF	40	yes	-0.180129	0.835163	0.00789732	0.0599374	down	2903, 2906, 3363, 3359, 1139, 1812, 8973, 3357, 1137
GO:0098754	detoxification	GOBP	81	yes	0.177553	1.19429	0.0120644	0.0609566	up	2950, 5052, 2879, 9588, 6415, 64359, 53905, 50506, 4501, 9446, 1728, 84817, 2878, 140809, 2877, 94241, 2938, 84293, 4257, 2954, 1193, 114757, 948, 119391, 26034, 7124, 4056
GO:0046620	regulation of organ growth	GOBP	68	yes	-0.136954	0.87201	0.0120938	0.0610573	down	27230, 2697, 5747, 5447, 3516, 7161, 1848, 2263, 10018, 54440, 32, 9472, 2247, 2627, 23414, 3574, 7472, 5629, 2303, 6532, 2066, 5950
GO:0051290	protein heterotetramerization	GOBP	20	yes	0.299209	1.34879	0.0121325	0.061197	up	2547, 6281, 6241, 2193, 10056, 4038, 23590, 1258
GO:0048070	regulation of developmental pigmentation	GOBP	12	yes	-0.228993	0.795334	0.0121405	0.061197	down	4254, 10018, 596, 3815
GO:0045931	positive regulation of mitotic cell cycle	GOBP	109	yes	0.152719	1.165	0.0121674	0.0612846	up	301, 23326, 11331, 8766, 4193, 29766, 9525, 5902, 1977, 1978, 51529, 7517, 7325, 2069, 940, 7480, 9099, 134353, 7015, 1950, 151242, 255324
hsa05310	Asthma	KEGG	9	yes	-0.238178	0.788062	0.0126189	0.0613738	down	958, 7124, 2205, 959
GO:0060099	regulation of phagocytosis, engulfment	GOBP	11	yes	0.356534	1.42837	0.0122117	0.0614595	up	3071, 2150, 948, 11314, 246, 2624, 5468, 26228
GO:0070232	regulation of T cell apoptotic process	GOBP	28	yes	-0.182111	0.833509	0.0122824	0.0617187	down	3091, 7157, 3620, 3965, 6352, 1942, 101, 3718, 81704, 939, 155038, 84524, 5133
GO:0009113	purine nucleobase biosynthetic process	GOBP	13	yes	0.36524	1.44086	0.0123496	0.0619596	up	8833, 353, 51816, 3251
hsa05130	Pathogenic Escherichia coli infection	KEGG	51	yes	0.216409	1.24161	0.0130925	0.0622623	up	71, 7534, 4691, 10383, 999, 2017, 10552, 7277, 84617, 4690, 81873, 7846, 2534, 100506658, 10381, 7280, 7100, 7454
GO:0009187	cyclic nucleotide metabolic process	GOBP	167	yes	-0.108711	0.89699	0.0124329	0.062277	down	801, 79718, 4283, 2773, 53836, 19, 5744, 112, 115, 5142, 2983, 10267, 9472, 2550, 23432, 8654, 2774, 10411, 135, 4880, 53829, 4157, 9495, 8477, 5739, 729230, 165140, 491, 9568, 4987, 1812, 10900, 7434, 3357, 2917
GO:0035966	response to topologically incorrect protein	GOBP	195	yes	0.121278	1.12894	0.0124606	0.062277	up	3320, 7009, 29927, 37, 27230, 6464, 1388, 51726, 7095, 9114, 58477, 9709, 1965, 3336, 4690, 23071, 267, 9797, 5295, 10018, 7873, 91319, 23480, 10551, 5610, 6388, 1663, 55432, 90993, 25822, 8988, 3305, 285533, 168620
GO:0043161	proteasome-mediated ubiquitin-dependent protein catabolic process	GOBP	416	yes	0.0833687	1.08694	0.0124647	0.062277	up	5708, 10134, 6613, 5887, 79718, 153830, 10755, 54461, 5886, 29979, 55666, 207, 5700, 7157, 4193, 7328, 10197, 8078, 5707, 25897, 550, 5686, 6386, 55968, 2932, 127544, 5713, 10221, 54926, 6478, 9709, 22838, 5717, 55905, 7319, 5527, 9683, 9616, 267, 51667, 54431, 90135, 5347, 369, 25820, 51529, 2768, 83892, 200933, 1855, 899, 7324, 28951, 9529, 54442, 5718, 10769, 54476, 5716, 64326, 91319, 29882, …
GO:2000403	positive regulation of lymphocyte migration	GOBP	26	yes	-0.188383	0.828297	0.0124736	0.062277	down	6278, 6364, 6352, 101, 29108, 8764, 3676, 729230, 8740, 6375
GO:0001964	startle response	GOBP	16	yes	-0.211497	0.809372	0.0124806	0.062277	down	1855, 4204, 2903, 2906, 84189, 9378, 1812, 3756
GO:0005778	peroxisomal membrane	GOCC	70	yes	0.196051	1.21659	0.0162915	0.0627381	up	375, 224, 2181, 2180, 8540, 50640, 4257, 9409, 9066, 8800, 23305, 225, 255027
GO:0031903	microbody membrane	GOCC	70	yes	0.196051	1.21659	0.0162915	0.0627381	up	375, 224, 2181, 2180, 8540, 50640, 4257, 9409, 9066, 8800, 23305, 225, 255027
GO:0060134	prepulse inhibition	GOBP	6	yes	-0.271495	0.762239	0.0125871	0.0627599	down	1855, 9378, 1812
GO:0070509	calcium ion import	GOBP	170	yes	-0.108159	0.897485	0.0126485	0.0629823	down	488, 801, 4283, 11151, 9446, 5788, 6363, 817, 6717, 1756, 4644, 90550, 55013, 10345, 55636, 3932, 3708, 1193, 6588, 1234, 9001, 1236, 9472, 51393, 2247, 9456, 845, 6263, 6546, 930, 5587, 55503, 623, 8989, 1950, 1812, 6375, 3357, 8913
GO:0007600	sensory perception	GOBP	332	yes	-0.0741389	0.928543	0.012669	0.0630221	down	4070, 2706, 9368, 80781, 3383, 3983, 6337, 4976, 7082, 10804, 4942, 4646, 5306, 89797, 5205, 1027, 11343, 501, 4204, 24139, 4155, 83641, 5875, 6907, 1545, 4644, 6338, 129880, 80055, 131118, 2534, 1301, 26521, 55636, 286262, 582, 9455, 8403, 3815, 55, 2903, 4856, 83872, 6340, 5330, 285440, 51393, 25861, 64072, 6940, 2906, 27241, 948, 4311, 2774, 9750, 5158, 135, 7068, 2700, 84189, 6096, 563, 84140…
GO:0045663	positive regulation of myoblast differentiation	GOBP	16	yes	-0.214891	0.806629	0.0127605	0.0634154	down	694, 4283, 3611, 7182, 2323, 50937, 4618, 8740
GO:0002829	negative regulation of type 2 immune response	GOBP	8	yes	-0.252874	0.776566	0.0128152	0.0635526	down	301, 9466, 729230
GO:0098573	intrinsic component of mitochondrial membrane	GOCC	47	yes	0.211257	1.23523	0.0166452	0.0637933	up	10452, 100287932, 10440, 23761, 664, 90550, 54968, 55013, 139322
GO:0006595	polyamine metabolic process	GOBP	31	yes	0.331884	1.39359	0.0129094	0.0639251	up	6303, 262, 6611, 6723, 54498
GO:0014065	phosphatidylinositol 3-kinase signaling	GOBP	150	yes	-0.104368	0.900894	0.0129188	0.0639251	down	9368, 4915, 9314, 2885, 207, 5747, 7249, 6352, 5527, 8870, 5467, 79837, 4254, 5295, 8396, 2263, 8394, 113791, 1839, 10818, 5293, 5305, 2321, 3717, 2534, 5156, 3667, 3932, 26051, 23411, 7301, 79899, 3815, 2150, 7409, 2247, 2268, 2246, 2069, 930, 940, 5294, 1440, 50852, 9365, 146850, 941, 2322, 145957, 1950, 3357, 2066
GO:0016866	intramolecular transferase activity	GOMF	48	yes	0.282235	1.32609	0.0085333	0.064114	up	5223, 1736, 26995, 5373, 80324, 27079
GO:0003680	AT DNA binding	GOMF	8	yes	0.420427	1.52261	0.00859136	0.064114	up	3159, 1396, 8091
GO:0005072	transforming growth factor beta receptor, cytoplasmic mediator activity	GOMF	11	yes	-0.249629	0.77909	0.00859411	0.064114	down	4089, 1027, 4086, 4092, 4091
GO:0048934	peripheral nervous system neuron differentiation	GOBP	13	yes	-0.222996	0.800118	0.0130169	0.0642698	down	4915, 864, 3670, 64843
GO:0048935	peripheral nervous system neuron development	GOBP	13	yes	-0.222996	0.800118	0.0130169	0.0642698	down	4915, 864, 3670, 64843
GO:0021954	central nervous system neuron development	GOBP	57	yes	-0.143145	0.866628	0.0130197	0.0642698	down	4915, 7832, 6091, 22809, 5747, 2049, 200933, 2263, 4929, 8829, 3251, 79600, 6092, 2047, 2624, 6900, 166614, 1812, 7101, 55079
GO:0019814	immunoglobulin complex	GOCC	6	yes	-0.278056	0.757254	0.0168867	0.0643135	down	100423062, 973, 974
GO:0045263	proton-transporting ATP synthase complex, coupling factor F(o)	GOCC	10	yes	0.352874	1.42315	0.0169415	0.0643135	up	518, 10476, 9551
GO:0001541	ovarian follicle development	GOBP	46	yes	-0.155202	0.856243	0.0130611	0.0643948	down	4323, 3383, 4089, 1051, 4254, 2309, 596, 408, 4327, 3815, 2099, 2069, 3625, 658, 2796, 89766
GO:0006600	creatine metabolic process	GOBP	15	yes	0.354591	1.4256	0.013065	0.0643948	up	6535, 1158, 1152, 6776, 1159, 548596
GO:0010830	regulation of myotube differentiation	GOBP	44	yes	-0.157499	0.854278	0.0131412	0.0646979	down	4323, 1048, 4283, 8837, 10938, 55544, 963, 596, 79365, 9518, 4856, 2323, 6474, 4773, 4618, 493829, 26287, 8740, 168620
GO:0051156	glucose 6-phosphate metabolic process	GOBP	34	yes	0.283404	1.32764	0.0131466	0.0646979	up	7167, 7086, 5223, 3099, 51071
GO:0009582	detection of abiotic stimulus	GOBP	82	yes	-0.129612	0.878436	0.0132042	0.0649317	down	3728, 801, 5310, 51109, 23258, 8048, 2534, 408, 1301, 3815, 9397, 5158, 63895, 2047, 8989, 2793, 1258, 491, 1259, 778, 79955, 644168
GO:0046132	pyrimidine ribonucleoside biosynthetic process	GOBP	17	yes	0.318274	1.37475	0.0132447	0.0650315	up	7372, 7378, 1723
GO:0045125	bioactive lipid receptor activity	GOMF	12	yes	-0.243304	0.784033	0.00877517	0.0650949	down	53637, 1903, 9294, 8698, 84636
GO:0045576	mast cell activation	GOBP	50	yes	-0.151565	0.859362	0.0133053	0.0652791	down	5359, 3965, 6813, 5880, 5293, 3937, 27342, 57102, 3815, 8832, 27040, 7535, 2268, 11314, 399, 695, 6283, 5294, 2624, 2205, 1268, 10666, 1269
GO:0019888	protein phosphatase regulator activity	GOMF	72	yes	0.198554	1.21964	0.00886701	0.0654066	up	6418, 801, 2029, 10776, 26472, 5514, 5527, 23523, 6992, 5525, 5764, 5510, 5610, 5523, 1827, 5529, 9858, 9749, 84988, 26051, 5507, 57718, 151242
GO:0031960	response to corticosteroid	GOBP	114	yes	-0.11068	0.895225	0.013364	0.0654465	down	301, 2950, 6382, 801, 678, 5176, 7332, 21, 114907, 5066, 1536, 2309, 596, 5730, 7298, 687, 355, 8061, 4747, 8644, 6586, 6770, 6285, 3291, 3569, 3670, 6752, 7124, 2796, 2322, 374
GO:0006378	mRNA polyadenylation	GOBP	37	yes	0.24028	1.2716	0.0133699	0.0654465	up	53981, 1025, 1478, 10898, 123169
GO:0030318	melanocyte differentiation	GOBP	22	yes	-0.197451	0.82082	0.0134053	0.06557	down	4254, 596, 4644, 3815, 6663, 4948
GO:0035414	negative regulation of catenin import into nucleus	GOBP	9	yes	0.372772	1.45175	0.0134156	0.0655703	up	9368, 10297
GO:0032958	inositol phosphate biosynthetic process	GOBP	16	yes	-0.21024	0.81039	0.0134324	0.0656025	down	5341, 64768, 2247
GO:0005996	monosaccharide metabolic process	GOBP	259	yes	0.1084	1.11449	0.0134689	0.0657286	up	2597, 226, 2171, 7167, 5230, 5500, 7086, 5223, 4191, 27230, 10776, 51094, 207, 4125, 2806, 3099, 5214, 5209, 2932, 2820, 4938, 6652, 5467, 6576, 2026, 51363, 2519, 5366, 11164, 51181, 2582, 114897, 4122, 7355, 1737, 7262, 4351, 3667, 5208, 23275, 23411, 84649, 5210, 32, 2585, 3795, 2526, 89801, 3569, 84750, 5167, 7124, 2529, 5105, 648791, 2822, 5950, 51738
GO:0030889	negative regulation of B cell proliferation	GOBP	13	yes	-0.222384	0.800608	0.0134786	0.0657286	down	5585, 3635, 472, 11314, 1493, 23495
GO:0008406	gonad development	GOBP	164	yes	-0.0982122	0.906457	0.0136022	0.0662812	down	6382, 4323, 3383, 8751, 3157, 4089, 25976, 1051, 4254, 10018, 2309, 596, 7022, 57599, 6665, 152006, 9510, 666, 4257, 5156, 408, 8644, 23411, 6586, 4327, 3815, 9985, 51804, 92, 2099, 7100, 10272, 57728, 6770, 367, 638, 2069, 5308, 30812, 6092, 10046, 54997, 2627, 23414, 3625, 658, 2796, 23639, 3207, 89766
GO:0001666	response to hypoxia	GOBP	273	yes	-0.0807318	0.922441	0.0137207	0.0667573	down	5034, 7009, 4323, 824, 51142, 3383, 7412, 29979, 3091, 207, 7157, 4193, 5327, 5352, 7852, 9520, 7351, 2113, 26355, 3516, 5066, 4089, 5058, 5467, 1027, 7515, 25828, 1978, 4204, 5764, 57085, 101, 3163, 1536, 5366, 2309, 9915, 4929, 596, 817, 472, 664, 650, 7097, 23411, 3708, 1263, 285, 5579, 114757, 6285, 27063, 3291, 6546, 126374, 4880, 2627, 5105, 3779, 4049, 1139, 7015, 6532, 23409, 1137
GO:0072538	T-helper 17 type immune response	GOBP	14	yes	-0.22201	0.800907	0.0137671	0.0668059	down	3662, 50943, 114836, 10538, 3569, 3594, 51561, 4063, 8995
GO:1903670	regulation of sprouting angiogenesis	GOBP	31	yes	-0.178276	0.836711	0.0137728	0.0668059	down	9314, 4804, 11235, 26051, 28514, 2247, 2246, 2303, 7101
GO:0019233	sensory perception of pain	GOBP	65	yes	-0.137377	0.871641	0.0137812	0.0668059	down	11343, 4204, 2534, 55, 2903, 4856, 2906, 4311, 2047, 4157, 623, 8989, 59344, 6335, 1268, 3231, 3737, 1740, 4987, 55800, 1137, 1269
GO:0006094	gluconeogenesis	GOBP	78	yes	0.188428	1.20735	0.013785	0.0668059	up	2597, 226, 7167, 5230, 5223, 4191, 10776, 2806, 2820, 6576, 2026, 84649, 3569, 5105, 5950
GO:0048709	oligodendrocyte differentiation	GOBP	68	yes	-0.135109	0.87362	0.0137877	0.0668059	down	2950, 928, 3065, 4915, 7852, 1031, 7161, 5803, 1967, 3398, 666, 7097, 79885, 8891, 118738, 79152, 30812, 6663, 10810, 5468, 6900, 3766, 54413, 1745, 1746, 5354
GO:0006613	cotranslational protein targeting to membrane	GOBP	101	yes	0.155825	1.16862	0.0137929	0.0668059	up	6152, 6165, 11224, 29927, 7095, 6730, 58477, 6729, 9697, 133022
GO:0048593	camera-type eye morphogenesis	GOBP	91	yes	-0.122636	0.884586	0.0138338	0.0668549	down	3091, 7528, 5764, 84678, 221935, 220, 1296, 10818, 357, 5797, 28514, 793, 112724, 6935, 54806, 50937, 5308, 30812, 6096, 286204, 2047, 362, 7472, 5629, 5950
GO:0051091	positive regulation of sequence-specific DNA binding transcription factor activity	GOBP	222	yes	-0.088236	0.915545	0.0138342	0.0668549	down	3728, 4057, 4792, 3383, 11331, 207, 8837, 4791, 9208, 23028, 81603, 3689, 4790, 3965, 7334, 7186, 9175, 8613, 101, 29108, 148022, 83696, 958, 8896, 7185, 5610, 2958, 10454, 8915, 8061, 3717, 7097, 3656, 11213, 7984, 3815, 2099, 150372, 23373, 5579, 367, 57118, 695, 6283, 3569, 89780, 5587, 7480, 121268, 7124, 5468, 7472, 11074, 1896, 54106, 8600, 959, 4808, 54360, 8995
GO:0031674	I band	GOCC	117	yes	0.141468	1.15196	0.0177886	0.0672108	up	226, 3728, 1674, 113146, 4703, 171024, 9531, 2318, 70, 114907, 27295, 88, 5058, 129446, 4625, 4660, 5525, 6717, 1756, 8048, 80206, 5142, 2275, 9499, 9456, 845, 27063, 6263, 6271, 6546, 79933, 57159, 4634, 26287, 91156, 55800
GO:0009130	pyrimidine nucleoside monophosphate biosynthetic process	GOBP	14	yes	0.343899	1.41044	0.0141833	0.0683956	up	7372, 7298, 7378, 1723
GO:0051147	regulation of muscle cell differentiation	GOBP	155	yes	-0.10293	0.90219	0.0141943	0.0683956	down	4904, 4323, 694, 1048, 4283, 9643, 8837, 3516, 3611, 4089, 10938, 5467, 1025, 55544, 2263, 7182, 963, 84193, 596, 663, 650, 28514, 79365, 9518, 3815, 4856, 9472, 6935, 84466, 2323, 50937, 2069, 6474, 8536, 30812, 22943, 144165, 89780, 4773, 7124, 4618, 341676, 493829, 26287, 8740, 5629, 168620
GO:0008625	extrinsic apoptotic signaling pathway via death domain receptors	GOBP	89	yes	-0.127376	0.880402	0.0141955	0.0683956	down	64114, 3383, 9531, 7132, 8837, 7128, 8795, 7186, 5295, 27018, 5366, 147138, 282991, 596, 355, 939, 8793, 3604, 7124, 658, 356
GO:0009295	nucleoid	GOCC	40	yes	0.221353	1.24776	0.0182938	0.0684734	up	292, 37, 7417, 6742, 10845, 60493, 55794, 7015
GO:0042645	mitochondrial nucleoid	GOCC	40	yes	0.221353	1.24776	0.0182938	0.0684734	up	292, 37, 7417, 6742, 10845, 60493, 55794, 7015
GO:0002040	sprouting angiogenesis	GOBP	71	yes	-0.133916	0.874664	0.0142476	0.0685951	down	9314, 6091, 4804, 11235, 441478, 8829, 9037, 23210, 26051, 28514, 2247, 2246, 11082, 168667, 84870, 2822, 2303, 7101, 9723
GO:0048385	regulation of retinoic acid receptor signaling pathway	GOBP	14	yes	0.328802	1.3893	0.014341	0.0689933	up	1382, 171023, 1488, 8644
GO:0000956	nuclear-transcribed mRNA catabolic process	GOBP	253	yes	0.113583	1.12029	0.0143535	0.0690019	up	1981, 6152, 6165, 11224, 678, 7832, 9775, 25804, 22916, 9939, 1977, 246175, 4686, 167227, 80153, 472, 23016, 23404, 51010, 57690, 11340, 118460, 64282
GO:0005849	mRNA cleavage factor complex	GOCC	19	yes	0.293666	1.34134	0.0185391	0.0690689	up	53981, 8394, 81608, 1478, 10898
GO:0042104	positive regulation of activated T cell proliferation	GOBP	21	yes	-0.193471	0.824094	0.014409	0.0691956	down	29108, 23308, 7292, 3559, 3594, 51561, 6504, 11148
GO:0006144	purine nucleobase metabolic process	GOBP	23	yes	0.304408	1.35582	0.0144153	0.0691956	up	8833, 23028, 353, 51816, 3251, 55
GO:0090201	negative regulation of release of cytochrome c from mitochondria	GOBP	16	yes	0.315741	1.37128	0.0144369	0.0692476	up	207, 4976, 10105, 55486, 5716
GO:0016814	hydrolase activity, acting on carbon-nitrogen (but not peptide) bonds, in cyclic amidines	GOMF	46	yes	-0.182675	0.833039	0.00950825	0.0694022	down	1635, 51816, 272, 60489, 200316, 105, 140564, 161823, 978, 164668, 161931, 57379
GO:0016891	endoribonuclease activity, producing 5'-phosphomonoesters	GOMF	27	yes	0.283144	1.3273	0.00952015	0.0694022	up	23405, 80153, 54913, 10248, 65080, 246243, 10799
GO:0030246	carbohydrate binding	GOMF	186	yes	-0.0970286	0.90753	0.00956724	0.0694022	down	226, 3998, 4125, 3099, 3965, 5836, 64129, 7360, 5310, 2997, 6652, 10423, 56261, 55057, 64841, 63917, 2591, 4122, 51809, 57124, 653499, 1203, 29094, 4065, 6402, 5168, 26232, 29121, 2995, 11226, 9945, 933, 81035, 64409, 89790, 50489, 969, 124220, 89801, 5167, 51267, 3820, 3957, 6900, 50856, 2208, 5806, 8909, 648791, 89858, 26033, 10219, 4360, 8778, 388512, 160365, 51348, 729238, 283420, 653509, 387…
GO:0032350	regulation of hormone metabolic process	GOBP	23	yes	0.280569	1.32388	0.0144961	0.0694799	up	3091, 23028, 5447, 55809, 650, 8644, 90527, 405753, 51083
GO:0002675	positive regulation of acute inflammatory response	GOBP	22	yes	-0.190617	0.826449	0.0146146	0.0699436	down	3572, 101, 1236, 695, 3569, 5294, 7124, 2205, 2867, 1268, 8600, 3818
GO:0006418	tRNA aminoacylation for protein translation	GOBP	86	yes	0.213514	1.23802	0.0146263	0.0699475	up	3735, 2617, 2193, 833, 10056, 55157, 80222, 124454, 7965
GO:0000987	core promoter proximal region sequence-specific DNA binding	GOMF	302	yes	-0.0792981	0.923765	0.00969618	0.069951	down	4904, 6774, 688, 3428, 3065, 9314, 3659, 4782, 4609, 4605, 8932, 4791, 86, 1052, 51043, 2120, 3516, 5187, 4084, 4089, 9603, 5993, 7161, 29841, 1051, 1874, 80709, 4774, 5017, 4086, 53335, 9915, 200014, 8061, 9658, 6688, 55636, 4602, 23109, 79365, 51804, 2099, 3662, 2313, 3642, 63950, 5452, 367, 54345, 10538, 5308, 6663, 4603, 5324, 7697, 30818, 3670, 4773, 4091, 171392, 2019, 10793, 4618, 5991, 75…
hsa00240	Pyrimidine metabolism	KEGG	90	yes	0.161597	1.17539	0.0150597	0.0700605	up	6241, 54107, 5425, 1635, 4860, 7372, 5437, 57804, 5432, 3704, 7298, 50484, 7378, 4907, 1723, 51733, 56953, 978
GO:0014032	neural crest cell development	GOBP	66	yes	-0.137204	0.871793	0.0147193	0.0703344	down	3911, 23603, 3091, 4254, 54910, 8829, 57556, 9037, 5308, 30812, 58495, 6663, 5979, 8854, 223117, 3670, 57715, 2303, 9723, 3357, 2066
GO:0009581	detection of external stimulus	GOBP	81	yes	-0.12872	0.879221	0.014729	0.0703344	down	3728, 801, 5310, 51109, 23258, 8048, 2534, 408, 1301, 3815, 9397, 5158, 63895, 2047, 8989, 2793, 1258, 491, 1259, 778, 79955, 644168
GO:0060045	positive regulation of cardiac muscle cell proliferation	GOBP	18	yes	-0.20182	0.817242	0.0147535	0.070399	down	3516, 2263, 2247, 2627, 23414, 7472, 2066
GO:0015935	small ribosomal subunit	GOCC	84	yes	0.179294	1.19637	0.0189912	0.0704256	up	51021, 51081, 64960, 51116, 56945, 6183, 10240
GO:0048864	stem cell development	GOBP	70	yes	-0.134073	0.874526	0.0148201	0.070664	down	3911, 23603, 3091, 5788, 4254, 54910, 8829, 57556, 9037, 5308, 30812, 58495, 6663, 5979, 8854, 223117, 3670, 57715, 7476, 2303, 9723, 3357, 2066
GO:0098742	cell-cell adhesion via plasma-membrane adhesion molecules	GOBP	183	yes	-0.09544	0.908973	0.0148925	0.0708523	down	1830, 999, 3383, 9314, 7412, 81607, 10205, 214, 6091, 27020, 5310, 25930, 1828, 5817, 221935, 3683, 5099, 9069, 653499, 650, 5797, 57228, 923, 4345, 421, 5098, 201633, 8832, 120425, 64072, 7122, 56122, 6092, 5979, 137075, 7216, 56253, 5789, 120114, 57717, 56133, 54798, 1014, 23562, 22997, 10666, 1823, 56125, 56129, 57453, 259197, 1002, 222256, 1015, 56132, 56128, 56131, 84623, 56097, 56130, 28316…
GO:0051238	sequestering of metal ion	GOBP	141	yes	-0.113197	0.892974	0.0149231	0.0708931	down	801, 4283, 6278, 11151, 9446, 5788, 6363, 817, 6717, 1756, 4644, 10345, 55636, 3932, 3708, 1193, 1234, 9001, 1236, 9472, 2247, 845, 6263, 6546, 930, 5587, 623, 8989, 1812, 6375, 3357
GO:0005744	mitochondrial inner membrane presequence translocase complex	GOCC	9	yes	0.35892	1.43178	0.0192219	0.0709526	up	100287932, 10440, 80273
GO:0060562	epithelial tube morphogenesis	GOBP	304	yes	-0.0772005	0.925704	0.0149721	0.0710734	down	4070, 4323, 3911, 6692, 11331, 2697, 8543, 9231, 3091, 4609, 1460, 7249, 1739, 10765, 3516, 5310, 3611, 4089, 57822, 5058, 57534, 57216, 5420, 80004, 9423, 54910, 1855, 1954, 2263, 4233, 84678, 1436, 1435, 441478, 8463, 8829, 596, 129880, 8915, 5567, 57619, 2719, 25902, 6688, 51684, 650, 51098, 28514, 26160, 51804, 2099, 200894, 80199, 4855, 388591, 5727, 2247, 54806, 367, 79600, 2246, 54345, 530…
GO:0002456	T cell mediated immunity	GOBP	70	yes	-0.133884	0.874691	0.0150143	0.0712209	down	3383, 1075, 53833, 1739, 1604, 7186, 5788, 5817, 23180, 925, 54440, 56940, 64005, 6693, 7454, 50943, 7292, 3575, 135250, 3569, 3594, 3077, 51561, 6556, 6504, 259197, 3592, 133396, 6375
GO:0001159	core promoter proximal region DNA binding	GOMF	303	yes	-0.078966	0.924071	0.00993078	0.071252	down	4904, 6774, 688, 3428, 3065, 9314, 3659, 4782, 4609, 4605, 8932, 4791, 86, 1052, 51043, 2120, 3516, 5187, 4084, 4089, 9603, 5993, 7161, 29841, 1051, 1874, 80709, 4774, 5017, 4086, 53335, 9915, 200014, 8061, 9658, 6688, 55636, 4602, 23109, 79365, 51804, 2099, 3662, 2313, 3642, 63950, 5452, 367, 54345, 10538, 5308, 6663, 4603, 5324, 7697, 30818, 3670, 4773, 4091, 171392, 2019, 10793, 4618, 5991, 75…
GO:0000978	RNA polymerase II core promoter proximal region sequence-specific DNA binding	GOMF	288	yes	-0.0804844	0.922669	0.0100283	0.0715604	down	4904, 6774, 688, 3428, 3065, 3659, 4782, 4609, 4605, 8932, 4791, 86, 1052, 51043, 2120, 3516, 5187, 4084, 4089, 9603, 5993, 7161, 29841, 1051, 1874, 80709, 4774, 5017, 4086, 53335, 9915, 200014, 8061, 6688, 55636, 4602, 23109, 79365, 51804, 2099, 3662, 2313, 3642, 5452, 367, 54345, 10538, 5308, 6663, 4603, 5324, 7697, 30818, 3670, 4773, 4091, 171392, 2019, 10793, 4618, 5991, 7545, 5079, 339488, 3…
GO:0002275	myeloid cell activation involved in immune response	GOBP	69	yes	-0.136049	0.8728	0.0151014	0.0715814	down	29, 3965, 6813, 5880, 6844, 29108, 148022, 5293, 1794, 27342, 57102, 3815, 2150, 90865, 8832, 27040, 7535, 2268, 11314, 695, 5294, 2624, 6504, 2205, 729230, 1524
GO:1902895	positive regulation of pri-miRNA transcription from RNA polymerase II promoter	GOBP	21	yes	-0.195312	0.822578	0.0151959	0.0719765	down	6774, 3091, 4804, 4086, 6688, 650, 4091, 7015
GO:0031125	rRNA 3'-end processing	GOBP	14	yes	0.334156	1.39676	0.0152107	0.0719936	up	23016, 23404, 51010, 11340, 112479, 118460
GO:0014821	phasic smooth muscle contraction	GOBP	10	yes	-0.235922	0.789842	0.0152402	0.07208	down	1739, 1907, 6752, 1812, 3357
GO:0055021	regulation of cardiac muscle tissue growth	GOBP	39	yes	-0.161696	0.8507	0.0153048	0.0723262	down	2697, 3516, 7161, 2263, 9472, 2247, 2627, 23414, 7472, 2066, 5950
GO:0043523	regulation of neuron apoptotic process	GOBP	178	yes	-0.0928388	0.91134	0.0153147	0.0723262	down	8626, 6418, 4170, 3065, 4915, 3091, 7832, 7157, 5641, 11151, 10280, 3611, 1728, 7161, 1051, 3265, 4204, 101, 10018, 84678, 5366, 2309, 4929, 8829, 596, 558, 6733, 8883, 472, 6812, 80315, 3717, 2534, 4747, 10752, 7301, 4835, 4671, 51804, 8851, 6770, 3981, 128434, 116986, 9244, 2020, 3670, 80823, 23529, 2019, 2045, 356, 1271, 627, 2561, 7015, 4908, 2914, 5063, 27324, 1745, 5582, 8200
GO:0045109	intermediate filament organization	GOBP	17	yes	0.313831	1.36866	0.0153887	0.0726225	up	3861, 5317, 1674, 5318, 4747, 4741, 3849, 3857
hsa05332	Graft-versus-host disease	KEGG	14	yes	-0.20809	0.812134	0.0160855	0.0732403	down	355, 5551, 3569, 940, 7124, 356, 941
GO:0002686	negative regulation of leukocyte migration	GOBP	28	yes	-0.180333	0.834992	0.0155335	0.073252	down	29, 79148, 11240, 27342, 90865, 4856, 5734, 727, 11314, 2841, 26228
GO:0007276	gamete generation	GOBP	432	yes	-0.064141	0.937873	0.0155648	0.0733458	down	8626, 330, 694, 10134, 5887, 8655, 10983, 6595, 207, 26528, 5127, 3985, 2120, 8607, 55905, 6732, 4089, 9665, 7528, 8613, 10018, 84678, 4957, 5017, 124997, 4086, 7182, 2309, 57446, 596, 57599, 5730, 94107, 558, 9425, 472, 8061, 9510, 81892, 164091, 151195, 5997, 6045, 9025, 23411, 7301, 4327, 3815, 9985, 10863, 6875, 92, 1672, 10272, 64395, 10461, 286128, 85315, 644150, 285, 6477, 11022, 23762, 36…
GO:0032401	establishment of melanosome localization	GOBP	23	yes	0.291828	1.33887	0.0156221	0.0735297	up	8766, 5861, 4644, 129880, 357, 388552, 64284
GO:0048505	regulation of timing of cell differentiation	GOBP	9	yes	-0.241887	0.785145	0.0156266	0.0735297	down	3516, 28514, 81544, 7101
GO:0052652	cyclic purine nucleotide metabolic process	GOBP	114	yes	-0.119922	0.88699	0.0156424	0.0735374	down	801, 2773, 53836, 19, 5744, 112, 115, 2983, 10267, 9472, 2550, 23432, 2774, 135, 4880, 53829, 4157, 9495, 8477, 5739, 729230, 165140, 9568, 4987, 1812, 10900, 7434, 3357, 2917
GO:0006112	energy reserve metabolic process	GOBP	102	yes	0.170422	1.1858	0.0156511	0.0735374	up	5500, 801, 4609, 207, 3572, 2932, 5836, 7360, 2997, 5257, 2992, 7262, 3667, 5255, 9945, 5507, 89801, 5167, 9365, 648791
GO:0032592	integral component of mitochondrial membrane	GOCC	45	yes	0.208051	1.23128	0.0200199	0.0735594	up	10452, 100287932, 10440, 23761, 664, 90550, 54968, 55013, 139322
GO:0072540	T-helper 17 cell lineage commitment	GOBP	9	yes	-0.249037	0.779551	0.0157272	0.073841	down	3662, 114836, 10538, 3569, 3594, 51561, 4063, 8995
GO:2001243	negative regulation of intrinsic apoptotic signaling pathway	GOBP	88	yes	0.168206	1.18318	0.0157984	0.0741211	up	972, 7009, 960, 4170, 7417, 3091, 207, 10625, 4318, 25946, 4976, 23028, 10105, 9709, 51060, 55486, 9529, 5329, 596, 50484, 624, 23411, 90993, 10017
GO:0001736	establishment of planar polarity	GOBP	141	yes	0.140872	1.15128	0.0158446	0.0742297	up	1173, 8626, 5708, 5700, 10197, 5707, 5686, 5713, 1175, 5717, 57822, 57216, 1855, 5718, 5716, 8324, 2719, 80199, 144165, 7976, 84870, 85407, 4919
GO:0007164	establishment of tissue polarity	GOBP	141	yes	0.140872	1.15128	0.0158446	0.0742297	up	1173, 8626, 5708, 5700, 10197, 5707, 5686, 5713, 1175, 5717, 57822, 57216, 1855, 5718, 5716, 8324, 2719, 80199, 144165, 7976, 84870, 85407, 4919
GO:0005230	extracellular ligand-gated ion channel activity	GOMF	62	yes	-0.165432	0.847527	0.0105208	0.0742314	down	2568, 2903, 2906, 3359, 2561, 1139, 8973, 2563, 2567, 1137
GO:0015125	bile acid transmembrane transporter activity	GOMF	11	yes	0.388609	1.47493	0.0105283	0.0742314	up	8273, 11309, 345274, 201780, 28234
GO:0008066	glutamate receptor activity	GOMF	19	yes	-0.22119	0.801564	0.0105722	0.0742314	down	2903, 2906, 2914, 2917
GO:0060397	JAK-STAT cascade involved in growth hormone signaling pathway	GOBP	14	yes	-0.229411	0.795002	0.015868	0.0742661	down	6774, 6776, 3718, 3717, 5618
GO:0006614	SRP-dependent cotranslational protein targeting to membrane	GOBP	93	yes	0.158082	1.17126	0.0159713	0.0746449	up	6152, 6165, 11224, 29927, 6730, 58477, 6729
GO:0032400	melanosome localization	GOBP	26	yes	0.281956	1.32572	0.0159796	0.0746449	up	8766, 5861, 4644, 129880, 357, 388552, 64284
GO:0002664	regulation of T cell tolerance induction	GOBP	9	yes	-0.24869	0.779822	0.0160143	0.0747273	down	3620, 916, 50943, 3559
GO:2000401	regulation of lymphocyte migration	GOBP	35	yes	-0.166968	0.846227	0.0160241	0.0747273	down	6278, 1893, 6364, 6352, 101, 29108, 8764, 11240, 3676, 1235, 729230, 8740, 6375
GO:0002026	regulation of the force of heart contraction	GOBP	27	yes	0.273458	1.3145	0.0160503	0.0747583	up	488, 4625, 817, 4633, 8048, 1907, 6546, 4634
GO:0030126	COPI vesicle coat	GOCC	17	yes	0.321622	1.37936	0.0206	0.0753452	up	22820, 9276, 23423, 51226
GO:0006402	mRNA catabolic process	GOBP	272	yes	0.108075	1.11413	0.016194	0.0753728	up	1981, 6152, 6165, 11224, 678, 7832, 9775, 25804, 22916, 9939, 1977, 246175, 4686, 167227, 80153, 472, 23016, 23404, 51010, 57690, 79899, 11340, 118460, 64282
GO:0034695	response to prostaglandin E	GOBP	21	yes	-0.194178	0.823511	0.0162172	0.0754266	down	207, 6363, 112, 54331, 1236, 5734, 7292, 5468, 2796, 5732
GO:0002714	positive regulation of B cell mediated immunity	GOBP	27	yes	-0.179516	0.835674	0.0162999	0.0756471	down	958, 51010, 118460, 7292, 695, 940, 23529, 7124, 2205, 2208, 30009, 4049, 10666, 6375
GO:0002891	positive regulation of immunoglobulin mediated immune response	GOBP	27	yes	-0.179516	0.835674	0.0162999	0.0756471	down	958, 51010, 118460, 7292, 695, 940, 23529, 7124, 2205, 2208, 30009, 4049, 10666, 6375
GO:0001738	morphogenesis of a polarized epithelium	GOBP	151	yes	0.134702	1.1442	0.0163309	0.0757364	up	1173, 8626, 5708, 9368, 3911, 9231, 5700, 10197, 5707, 5686, 5713, 1175, 5717, 57822, 57216, 8650, 1855, 5718, 5716, 8324, 2719, 80199, 54806, 144165, 7976, 84870, 85407, 4919, 6939
GO:0030099	myeloid cell differentiation	GOBP	336	yes	-0.075043	0.927704	0.0163624	0.0758276	down	3428, 4057, 10537, 4792, 3091, 4609, 4055, 23218, 4318, 25946, 29766, 23028, 10006, 7994, 10221, 2113, 3516, 93974, 7071, 5971, 1051, 760, 4254, 5295, 6363, 1436, 1435, 4891, 2309, 3398, 3635, 1021, 355, 54861, 9770, 5293, 5305, 84293, 3071, 3717, 2719, 23210, 123169, 6688, 10320, 3394, 28514, 23411, 3815, 2150, 92, 10272, 3662, 10365, 1236, 2313, 1880, 10202, 10538, 140685, 51561, 2624, 54997, 1…
GO:0071318	cellular response to ATP	GOBP	11	yes	-0.22881	0.79548	0.0163877	0.0758763	down	54434, 57026, 6263, 64805
GO:0045137	development of primary sexual characteristics	GOBP	168	yes	-0.0950204	0.909354	0.0163965	0.0758763	down	6382, 4323, 3383, 8751, 3157, 4089, 25976, 1051, 4254, 10018, 2309, 596, 7022, 57599, 6665, 152006, 9510, 666, 4257, 5156, 408, 8644, 23411, 6586, 4327, 3815, 9985, 51804, 92, 2099, 7100, 10272, 57728, 6770, 367, 638, 2069, 5308, 30812, 6092, 10046, 54997, 2627, 23414, 3625, 658, 2796, 23639, 3207, 89766
GO:0051668	localization within membrane	GOBP	71	yes	-0.13403	0.874564	0.0164445	0.0760442	down	5861, 6249, 1739, 3689, 1855, 5764, 23180, 3683, 914, 1794, 196383, 3695, 4038, 57728, 3676, 51308, 8292, 9378, 1740
GO:0044033	multi-organism metabolic process	GOBP	205	yes	0.106588	1.11248	0.0165929	0.0766224	up	6152, 6165, 11224, 8662, 3065, 5045, 81603, 6352, 5604, 1025, 9688, 5606, 5437, 79902, 5432, 8411, 81559, 60489, 55054, 79023, 200316, 140564, 8091, 11074, 164668, 5288
GO:0051561	positive regulation of mitochondrial calcium ion concentration	GOBP	8	yes	0.389847	1.47675	0.0165934	0.0766224	up	10134, 90550
GO:0009812	flavonoid metabolic process	GOBP	11	yes	0.377365	1.45844	0.0166409	0.0767865	up	5447, 7368, 54575, 7367
GO:0005922	connexin complex	GOCC	13	yes	0.320836	1.37828	0.0211048	0.0768408	up	2706, 2697, 10804, 125111, 2700, 375519
GO:0006275	regulation of DNA replication	GOBP	107	yes	0.149412	1.16115	0.0167212	0.0771019	up	6282, 6464, 4254, 3265, 59343, 23560, 55704, 54881, 5156, 7014, 79991, 80169, 7270, 3364, 54962, 2069, 3569, 374
GO:0036064	ciliary basal body	GOCC	78	yes	-0.12056	0.886424	0.0214019	0.0773948	down	207, 5108, 25930, 121441, 117178, 129880, 26160, 582, 55835, 9742, 2121, 23116, 755, 57539, 54806, 80776, 84140, 8100, 23329, 79989, 79841
GO:0005811	lipid particle	GOCC	59	yes	0.182756	1.20052	0.0214502	0.0773948	up	2597, 7879, 10134, 2167, 10226, 5878, 10280, 10938, 2181, 29803, 51099, 27141, 23111, 84649, 158584, 168537, 26157, 246, 80339
GO:0045089	positive regulation of innate immune response	GOBP	323	yes	-0.0771059	0.925792	0.0168285	0.0775221	down	1508, 5708, 3428, 330, 4057, 4792, 10318, 29979, 3659, 5700, 10197, 5707, 7128, 340061, 5359, 5686, 5641, 5713, 3689, 4790, 6352, 5717, 7334, 5971, 5058, 3265, 101, 5718, 5716, 4214, 5817, 29108, 148022, 7867, 23180, 10454, 8915, 3055, 5567, 2534, 7097, 3385, 3656, 3684, 11213, 92747, 7301, 2150, 2099, 7100, 3902, 3662, 7409, 27293, 7096, 81035, 10333, 948, 114836, 2069, 695, 26191, 1755, 81793, …
GO:0060831	smoothened signaling pathway involved in dorsal/ventral neural tube patterning	GOBP	12	yes	-0.223104	0.800031	0.0168364	0.0775221	down	5567, 51684, 57728, 5727, 23432
GO:0072079	nephron tubule formation	GOBP	16	yes	-0.20995	0.810625	0.0168683	0.0776135	down	51804, 30812, 7475
GO:0046777	protein autophosphorylation	GOBP	244	yes	-0.0843261	0.919131	0.0168994	0.077701	down	801, 8428, 4915, 207, 5747, 415116, 5912, 7297, 9748, 2932, 2011, 5292, 1965, 5058, 10494, 9175, 10188, 65268, 2049, 29904, 9262, 2263, 11040, 1436, 817, 7867, 57826, 3718, 5610, 7444, 472, 9770, 3055, 1198, 8805, 2321, 3717, 2534, 5156, 7443, 11213, 9706, 5753, 3932, 7301, 3815, 57396, 11184, 4294, 7535, 2268, 3702, 695, 2047, 5587, 5167, 84206, 2045, 640, 816, 225689, 2322, 4117, 7294, 2066, 20…
GO:0055094	response to lipoprotein particle	GOBP	17	yes	0.310932	1.3647	0.0169236	0.0777566	up	928, 3157, 3689, 19, 948, 5468
GO:0038092	nodal signaling pathway	GOBP	8	yes	-0.247483	0.780764	0.0170422	0.0782459	down	60436, 168002
GO:0000027	ribosomal large subunit assembly	GOBP	21	yes	0.284101	1.32857	0.0172555	0.0791551	up	6152, 55052, 55794
GO:1901998	toxin transport	GOBP	34	yes	0.238328	1.26912	0.0172648	0.0791551	up	7203, 9276, 6950, 10694, 8829, 664, 9325
GO:0021542	dentate gyrus development	GOBP	12	yes	-0.222566	0.800462	0.0173263	0.079349	down	7832, 1021, 5629, 1812, 7101, 55079
GO:0071243	cellular response to arsenic-containing substance	GOBP	12	yes	0.337822	1.40189	0.0173318	0.079349	up	10105, 9446, 7390, 90637, 119391
GO:2000273	positive regulation of receptor activity	GOBP	45	yes	0.218843	1.24464	0.017361	0.0794262	up	801, 9446, 88, 8896, 10345, 9001, 9472, 2069, 3077, 23237, 1950, 54413, 255324
GO:0032988	ribonucleoprotein complex disassembly	GOBP	11	yes	0.34604	1.41346	0.0173737	0.0794277	up	3831, 4528, 92399
GO:0008585	female gonad development	GOBP	74	yes	-0.126923	0.880802	0.0174455	0.0796996	down	4323, 3383, 4089, 25976, 1051, 4254, 2309, 596, 9510, 5156, 408, 23411, 6586, 4327, 3815, 2099, 2069, 5308, 6092, 23414, 3625, 658, 2796, 89766
GO:0030137	COPI-coated vesicle	GOCC	27	yes	0.268703	1.30827	0.0221898	0.0797041	up	375, 22820, 9276, 10945, 23423, 51226
GO:0014066	regulation of phosphatidylinositol 3-kinase signaling	GOBP	126	yes	-0.10545	0.899919	0.0174762	0.0797832	down	9368, 4915, 9314, 2885, 207, 5747, 7249, 6352, 5527, 8870, 5467, 79837, 4254, 5295, 8396, 2263, 8394, 113791, 1839, 10818, 5293, 5305, 2321, 3717, 2534, 5156, 3667, 3932, 26051, 23411, 79899, 3815, 2150, 7409, 2247, 2268, 2246, 2069, 930, 940, 1440, 50852, 9365, 941, 2322, 145957, 1950, 2066
GO:0098869	cellular oxidant detoxification	GOBP	75	yes	0.172965	1.18882	0.017502	0.0798444	up	2950, 5052, 2879, 9588, 6415, 64359, 53905, 50506, 9446, 1728, 84817, 2878, 140809, 2877, 94241, 2938, 84293, 4257, 2954, 1193, 114757, 948, 119391, 26034, 7124, 4056
GO:1902042	negative regulation of extrinsic apoptotic signaling pathway via death domain receptors	GOBP	30	yes	-0.172332	0.8417	0.0175553	0.0800309	down	64114, 3383, 8837, 7128, 8795, 7186, 355, 356
GO:0014857	regulation of skeletal muscle cell proliferation	GOBP	7	yes	-0.255194	0.774766	0.0175824	0.0800408	down	8837, 5467, 2247
GO:1990748	cellular detoxification	GOBP	78	yes	0.170635	1.18606	0.0176289	0.0801393	up	2950, 5052, 2879, 9588, 6415, 64359, 53905, 50506, 9446, 1728, 84817, 2878, 140809, 2877, 94241, 2938, 84293, 4257, 2954, 1193, 114757, 948, 119391, 26034, 7124, 4056
GO:0050691	regulation of defense response to virus by host	GOBP	26	yes	-0.184864	0.831217	0.0176657	0.0802498	down	7128, 340061, 54476, 29108, 60489, 200316, 3600, 3594, 51561, 117854
GO:0007254	JNK cascade	GOBP	224	yes	-0.0888724	0.914962	0.0176955	0.0803286	down	2950, 6317, 207, 4055, 9611, 6386, 10221, 7186, 5187, 5058, 57216, 9175, 7161, 5585, 3265, 6363, 2122, 7164, 29108, 8324, 10454, 260425, 4188, 9770, 56940, 4616, 3656, 7984, 55504, 9459, 2150, 11184, 10044, 4294, 939, 1236, 5734, 8325, 10333, 5345, 10912, 26191, 2047, 64170, 6504, 7124, 171392, 2205, 10913, 54106, 7476, 8600, 959, 4868
hsa04621	NOD-like receptor signaling pathway	KEGG	55	yes	-0.135473	0.873303	0.0180331	0.0803977	down	3320, 330, 4792, 7128, 4790, 5603, 6352, 7205, 29108, 22861, 10454, 10910, 22900, 4671, 84674, 9051, 3569, 64170, 7124, 260434
GO:0002718	regulation of cytokine production involved in immune response	GOBP	54	yes	-0.14304	0.866719	0.0177815	0.080662	down	972, 7186, 8764, 3718, 8915, 54440, 11213, 2150, 50943, 7292, 10225, 948, 695, 3569, 3077, 6504, 7124, 117854, 2867, 10666, 6375
GO:0060192	negative regulation of lipase activity	GOBP	10	yes	0.35398	1.42473	0.0179976	0.081585	up	301, 5447, 5997
GO:0031430	M band	GOCC	20	yes	0.276791	1.31889	0.0228874	0.0818428	up	226, 5525, 127294, 442721, 8736, 23676, 6271
GO:0051905	establishment of pigment granule localization	GOBP	24	yes	0.28244	1.32636	0.0182074	0.0823618	up	8766, 5861, 4644, 129880, 357, 388552, 64284
GO:0002479	antigen processing and presentation of exogenous peptide antigen via MHC class I, TAP-dependent	GOBP	53	yes	0.197064	1.21782	0.0182421	0.082461	up	5708, 3685, 5700, 10197, 5707, 5686, 5713, 5717, 5718, 5716, 1536, 4689, 948, 50489, 653361
GO:0046636	negative regulation of alpha-beta T cell activation	GOBP	18	yes	-0.19799	0.820378	0.0182895	0.0825292	down	301, 3965, 8764, 3718, 50943, 7292, 11314, 3077, 6375, 8995
GO:0051875	pigment granule localization	GOBP	27	yes	0.273558	1.31463	0.0182915	0.0825292	up	8766, 5861, 4644, 129880, 357, 388552, 64284
GO:1903902	positive regulation of viral life cycle	GOBP	92	yes	0.160046	1.17356	0.0182957	0.0825292	up	5034, 5886, 5479, 9525, 27243, 3965, 6352, 6732, 27183, 1025, 5437, 5432, 7113, 25978, 6733, 81559, 940
GO:0070167	regulation of biomineral tissue development	GOBP	63	yes	-0.134716	0.873964	0.018321	0.0825855	down	4057, 2697, 3091, 1893, 56172, 91461, 650, 55589, 92, 6546, 1594, 5167, 7480, 658, 9365, 162466, 7475
GO:0009880	embryonic pattern specification	GOBP	43	yes	-0.150998	0.859849	0.0183988	0.0828783	down	4089, 2263, 6493, 4086, 441478, 8829, 10818, 80055, 28514, 5727, 201164, 23242, 84976, 3234, 4091, 7476, 2066
GO:0042058	regulation of epidermal growth factor receptor signaling pathway	GOBP	84	yes	0.166468	1.18113	0.0184247	0.0829367	up	1173, 7879, 2885, 207, 4318, 6464, 9146, 1175, 9052, 5329, 10551, 30011, 5795, 8027, 5753, 9001, 1796, 2069, 356, 1950, 6456, 255324
GO:0043631	RNA polyadenylation	GOBP	41	yes	0.228559	1.25679	0.0184643	0.0829989	up	53981, 1025, 1478, 10898, 123169
GO:0048846	axon extension involved in axon guidance	GOBP	45	yes	-0.155823	0.85571	0.0185642	0.0833317	down	5361, 214, 54910, 1954, 8829, 57556, 9037, 6586, 10154, 89780, 223117, 57715, 6585, 9723
GO:1902284	neuron projection extension involved in neuron projection guidance	GOBP	45	yes	-0.155823	0.85571	0.0185642	0.0833317	down	5361, 214, 54910, 1954, 8829, 57556, 9037, 6586, 10154, 89780, 223117, 57715, 6585, 9723
GO:0048535	lymph node development	GOBP	15	yes	-0.208015	0.812195	0.0187262	0.0838794	down	57124, 4050, 3600, 3575, 643, 4049
GO:0046415	urate metabolic process	GOBP	6	yes	0.400257	1.49221	0.0187451	0.0838794	up	4860, 220963
GO:0006260	DNA replication	GOBP	351	yes	0.0914764	1.09579	0.0187513	0.0838794	up	6282, 6418, 3159, 6241, 4782, 54107, 5425, 11073, 6464, 10189, 11177, 29803, 1025, 4254, 3265, 59343, 23560, 6742, 4774, 57804, 5000, 55704, 50484, 5429, 472, 54881, 201254, 27000, 5156, 7014, 79991, 5888, 80169, 10039, 7270, 23411, 51550, 246243, 23594, 898, 3364, 54962, 2069, 3569, 43, 56953, 92797, 144715, 1950, 374
GO:2000108	positive regulation of leukocyte apoptotic process	GOBP	26	yes	-0.179151	0.83598	0.0188316	0.0841798	down	301, 7157, 3620, 3965, 6352, 101, 355, 23411, 84524, 5133
GO:0045661	regulation of myoblast differentiation	GOBP	37	yes	-0.1597	0.8524	0.0188494	0.0842011	down	694, 4283, 3611, 5467, 7182, 28514, 2323, 50937, 30812, 144165, 7124, 4618, 26287, 8740
GO:0009190	cyclic nucleotide biosynthetic process	GOBP	115	yes	-0.116784	0.889778	0.0188834	0.0842778	down	801, 2773, 53836, 19, 5744, 112, 115, 2983, 10267, 9472, 2550, 23432, 2774, 135, 4880, 53829, 4157, 9495, 8477, 5739, 729230, 165140, 9568, 4987, 1812, 10900, 7434, 3357, 2917
GO:0046165	alcohol biosynthetic process	GOBP	104	yes	0.155836	1.16863	0.0188974	0.0842778	up	1718, 7555, 2222, 2224, 47, 3157, 4790, 5447, 9517, 10682, 10558, 6307, 1717, 116150, 1595, 3422, 51477, 5341, 11161, 4597, 64768, 2247, 2246, 1066, 1594, 7124, 5105, 1621
GO:0009309	amine biosynthetic process	GOBP	21	yes	0.320293	1.37753	0.0189205	0.0842778	up	6303, 262, 6611, 6723, 54498, 1621
GO:0042401	cellular biogenic amine biosynthetic process	GOBP	21	yes	0.320293	1.37753	0.0189205	0.0842778	up	6303, 262, 6611, 6723, 54498, 1621
GO:1901215	negative regulation of neuron death	GOBP	160	yes	-0.0955035	0.908915	0.0189321	0.0842778	down	6418, 6774, 3065, 4915, 3091, 5176, 207, 7832, 5700, 5641, 11151, 6653, 7186, 3611, 7161, 1051, 3265, 4204, 101, 84678, 4929, 8829, 596, 558, 6812, 80315, 3717, 2534, 4747, 10752, 23411, 7301, 4671, 51804, 6770, 3981, 128434, 116986, 3569, 9244, 2020, 3670, 80823, 23529, 1440, 2019, 1271, 627, 2561, 7015, 4908, 27324, 1745, 5582, 8200
GO:0043039	tRNA aminoacylation	GOBP	89	yes	0.202677	1.22468	0.0190065	0.0845507	up	3735, 2617, 2193, 833, 10056, 55157, 80222, 124454, 7965
GO:0019867	outer membrane	GOCC	198	yes	0.109165	1.11535	0.0237516	0.0845556	up	4170, 3429, 7417, 11331, 2697, 518, 3099, 4976, 340061, 56172, 9868, 10452, 4128, 23788, 10280, 192111, 2181, 1717, 2180, 80777, 10204, 8303, 10018, 55669, 401505, 5366, 4891, 596, 10651, 664, 345778, 23111, 666, 4257, 23175, 32, 6843, 201164, 6663, 126129, 1594, 6556, 23098, 23305, 10017, 4056, 55340
GO:0010927	cellular component assembly involved in morphogenesis	GOBP	276	yes	-0.0779904	0.924973	0.0190324	0.0846076	down	71, 928, 2817, 3911, 58, 3983, 8837, 5108, 29766, 70, 9114, 88, 3611, 4089, 23405, 10938, 23332, 57216, 64422, 1874, 90102, 51382, 117178, 4633, 85014, 4628, 200576, 54874, 8048, 129880, 80206, 5156, 7097, 153241, 10257, 115704, 26160, 582, 55835, 79867, 9742, 51804, 9662, 200894, 9001, 85302, 23136, 23116, 57728, 80199, 79140, 57539, 54806, 442721, 27241, 845, 27063, 7368, 79734, 91147, 23114, 8…
GO:0071900	regulation of protein serine/threonine kinase activity	GOBP	494	yes	-0.0617942	0.940076	0.0191677	0.0850934	down	972, 2810, 2950, 801, 7532, 4057, 11140, 6317, 207, 7128, 6464, 1849, 9146, 8795, 1163, 2889, 7852, 10221, 6653, 1031, 5310, 7186, 3611, 200958, 5058, 1942, 5899, 57216, 5604, 9175, 1027, 2180, 7161, 5347, 11235, 5585, 4254, 3265, 1848, 28951, 5606, 5906, 23560, 101, 8812, 6363, 56647, 1436, 5716, 80824, 9020, 7164, 4214, 29108, 8692, 7867, 958, 5610, 10454, 10818, 29775, 4188, 7026, 2321, 3717, …
GO:0009220	pyrimidine ribonucleotide biosynthetic process	GOBP	19	yes	0.301183	1.35146	0.0191681	0.0850934	up	7372, 7378, 1723
GO:0006875	cellular metal ion homeostasis	GOBP	455	yes	-0.0663712	0.935783	0.019315	0.0856861	down	7009, 488, 483, 375, 801, 3934, 10134, 4057, 4283, 2697, 4502, 3091, 79572, 4609, 27020, 7852, 11151, 2769, 309, 9709, 6352, 4501, 55858, 9446, 5310, 1604, 4089, 54499, 5788, 3954, 920, 1317, 489, 3163, 6363, 4891, 79901, 596, 817, 57620, 6717, 94107, 958, 1756, 114897, 2053, 8048, 4644, 90550, 1043, 3717, 624, 5156, 55013, 10345, 55636, 1907, 3932, 793, 3708, 57181, 1193, 2150, 7018, 84239, 1234…
GO:0034593	phosphatidylinositol bisphosphate phosphatase activity	GOMF	36	yes	-0.18882	0.827935	0.012324	0.086071	down	200576, 8776, 3631, 27124, 9108
GO:0016860	intramolecular oxidoreductase activity	GOMF	57	yes	0.234252	1.26396	0.0123932	0.0860969	up	5034, 7167, 2923, 10728, 9536, 10682, 23071, 3422, 80142, 5730, 84650, 4351
GO:0019838	growth factor binding	GOMF	147	yes	-0.109811	0.896004	0.0124679	0.0861597	down	3655, 2817, 3685, 4915, 7850, 3572, 9982, 5045, 6464, 4053, 6386, 3561, 4804, 4054, 2263, 5764, 8829, 8692, 3560, 3977, 2321, 3587, 5156, 3489, 3570, 23105, 92, 9001, 4856, 948, 3559, 85409, 11082, 9365, 1280
GO:0014075	response to amine	GOBP	34	yes	-0.162114	0.850344	0.0194856	0.0861667	down	801, 3065, 3383, 1808, 4929, 3251, 50484, 7390, 2903, 5021, 1812, 1269, 1621
GO:0007259	JAK-STAT cascade	GOBP	154	yes	-0.103667	0.901526	0.0194952	0.0861667	down	6774, 3065, 51094, 7132, 3572, 9021, 9146, 6352, 5310, 6776, 1436, 958, 3718, 1545, 3717, 2534, 3455, 64101, 3570, 8651, 5753, 9306, 3815, 3600, 8835, 146760, 11314, 5618, 3569, 5979, 23767, 51561, 9244, 6775, 3670, 29949, 23529, 79883, 729230, 116379, 2811, 94030, 2322, 1950, 3592, 133396, 2066, 50604, 1101, 8995
GO:0097696	STAT cascade	GOBP	154	yes	-0.103667	0.901526	0.0194952	0.0861667	down	6774, 3065, 51094, 7132, 3572, 9021, 9146, 6352, 5310, 6776, 1436, 958, 3718, 1545, 3717, 2534, 3455, 64101, 3570, 8651, 5753, 9306, 3815, 3600, 8835, 146760, 11314, 5618, 3569, 5979, 23767, 51561, 9244, 6775, 3670, 29949, 23529, 79883, 729230, 116379, 2811, 94030, 2322, 1950, 3592, 133396, 2066, 50604, 1101, 8995
GO:0046475	glycerophospholipid catabolic process	GOBP	11	yes	-0.231194	0.793585	0.0195062	0.0861667	down	56261, 50640, 8605, 133121
GO:0002483	antigen processing and presentation of endogenous peptide antigen	GOBP	14	yes	-0.231172	0.793603	0.0195281	0.0861667	down	6892, 51752, 64167, 3077, 5243
GO:0019885	antigen processing and presentation of endogenous peptide antigen via MHC class I	GOBP	14	yes	-0.231172	0.793603	0.0195281	0.0861667	down	6892, 51752, 64167, 3077, 5243
GO:0010559	regulation of glycoprotein biosynthetic process	GOBP	34	yes	-0.163639	0.849049	0.0195304	0.0861667	down	9445, 2801, 6363, 596, 1839, 9933, 3718, 10267, 1236, 9452, 3600
GO:0046545	development of primary female sexual characteristics	GOBP	77	yes	-0.123382	0.883926	0.0195488	0.0861782	down	4323, 3383, 4089, 25976, 1051, 4254, 2309, 596, 9510, 5156, 408, 23411, 6586, 4327, 3815, 2099, 2069, 5308, 6092, 23414, 3625, 658, 2796, 89766
GO:0070372	regulation of ERK1 and ERK2 cascade	GOBP	200	yes	-0.0871138	0.916573	0.0195598	0.0861782	down	972, 2950, 960, 9368, 10318, 3383, 11331, 9314, 6278, 27020, 1739, 2889, 3965, 6364, 6352, 4089, 5604, 65268, 3265, 1848, 2263, 5906, 6363, 1436, 29108, 8829, 817, 6237, 10818, 1846, 5156, 408, 650, 4835, 2150, 374403, 1236, 1880, 2247, 948, 2246, 5345, 26191, 3569, 2047, 246, 168667, 6504, 7124, 2045, 285315, 6357, 9290, 8600, 285016, 388325, 6375, 3357, 57105, 2066, 6846, 10344
GO:0070482	response to oxygen levels	GOBP	297	yes	-0.0743475	0.928349	0.0195749	0.0861856	down	5034, 7009, 4323, 824, 51142, 3065, 3383, 7412, 29979, 3091, 207, 7157, 4193, 5327, 5352, 7852, 9520, 7351, 2113, 26355, 3516, 5066, 4089, 5058, 5467, 1027, 7515, 25828, 1978, 29904, 4204, 5764, 57085, 101, 3163, 1536, 5366, 2309, 9915, 4929, 596, 817, 355, 472, 664, 80315, 650, 7097, 51167, 23411, 3708, 1263, 285, 5579, 114757, 6285, 27063, 3291, 6546, 126374, 4880, 2627, 5468, 5105, 3779, 5021,…
hsa04320	Dorso-ventral axis formation	KEGG	22	yes	-0.179392	0.835778	0.0199634	0.0863138	down	2885, 2120, 2113, 5604, 56907, 51513, 4855, 143689, 9271
hsa03060	Protein export	KEGG	23	yes	0.290677	1.33733	0.0201668	0.0863138	up	29927, 7095, 6730, 58477, 23478, 6729, 23480
GO:1902188	positive regulation of viral release from host cell	GOBP	17	yes	0.319069	1.37585	0.0196593	0.086439	up	9525, 27243, 27183, 25978
GO:0045622	regulation of T-helper cell differentiation	GOBP	26	yes	-0.180569	0.834795	0.0197109	0.0865788	down	301, 6363, 3718, 4602, 3662, 50943, 7292, 3569, 3594, 51561, 941, 8995
GO:0035239	tube morphogenesis	GOBP	343	yes	-0.0705642	0.931868	0.019718	0.0865788	down	4070, 8626, 4323, 3911, 6692, 11331, 2697, 8543, 9231, 3091, 4609, 1460, 7249, 1739, 10765, 3516, 5310, 3611, 4089, 57822, 5058, 57534, 57216, 5420, 2049, 80004, 9423, 54910, 1855, 1954, 2263, 4233, 10018, 84678, 1436, 1435, 441478, 8463, 3398, 8829, 596, 10551, 129880, 8915, 5567, 57619, 2719, 25902, 6688, 5156, 51684, 650, 51098, 6932, 55636, 28514, 26160, 51804, 2099, 200894, 80199, 4855, 3885…
GO:0034655	nucleobase-containing compound catabolic process	GOBP	454	yes	0.0803486	1.08366	0.0197598	0.0867032	up	1981, 6152, 6165, 11224, 3005, 678, 7832, 8761, 9775, 3836, 25804, 22916, 9939, 23405, 9797, 4860, 1977, 246175, 4686, 51816, 6499, 11164, 51071, 3251, 6996, 3704, 167227, 272, 80153, 7378, 472, 60489, 23016, 23404, 81892, 5142, 55270, 51010, 1774, 57690, 79899, 11340, 4907, 200316, 246243, 118460, 64282, 8654, 22875, 6039, 10411, 161823, 1677, 51733, 56953, 978, 5167, 10595, 164668, 56164, 57379
GO:0033198	response to ATP	GOBP	24	yes	-0.180349	0.834978	0.0199529	0.0874909	down	54434, 6402, 57026, 6263, 6546, 64805
GO:0060742	epithelial cell differentiation involved in prostate gland development	GOBP	12	yes	-0.219837	0.80265	0.0199804	0.0875518	down	8626, 2263, 367, 10481, 768239
hsa05146	Amoebiasis	KEGG	97	yes	-0.10876	0.896946	0.0208712	0.0875771	down	7879, 3911, 5275, 6317, 7850, 5747, 5878, 5055, 3689, 2769, 4790, 88, 8503, 6318, 5295, 5293, 5567, 7097, 1301, 3684, 1286, 384, 5330, 5579, 2774, 3569, 733, 5294, 1288, 4583, 7124, 1280, 3592, 5582
GO:0048710	regulation of astrocyte differentiation	GOBP	21	yes	-0.187671	0.828887	0.0200099	0.0876215	down	3572, 3398, 650, 4613, 23529, 6900, 7101
GO:1902581	multi-organism cellular localization	GOBP	66	yes	0.180136	1.19738	0.0200549	0.0876993	up	7879, 5901, 3838, 3840, 3836, 10189, 9688, 79902, 3839, 79023, 9397, 402569
GO:1902583	multi-organism intracellular transport	GOBP	66	yes	0.180136	1.19738	0.0200549	0.0876993	up	7879, 5901, 3838, 3840, 3836, 10189, 9688, 79902, 3839, 79023, 9397, 402569
GO:0060538	skeletal muscle organ development	GOBP	145	yes	-0.0974294	0.907166	0.0200912	0.0877985	down	688, 2817, 58, 7832, 8837, 9328, 9318, 56261, 596, 1756, 140465, 8048, 59269, 7026, 3131, 9215, 28514, 51804, 8819, 63950, 84466, 57462, 9242, 9456, 6285, 50937, 3792, 27063, 9750, 6474, 5308, 29895, 7504, 11149, 30812, 22943, 1310, 115509, 89780, 84976, 7480, 9099, 4634, 4618, 8320, 5079, 1271, 26287, 92737, 5081, 4868
GO:0008023	transcription elongation factor complex	GOCC	43	yes	0.210082	1.23378	0.0247824	0.0878349	up	22936, 1025, 6924, 84337, 123169, 6919, 84524, 26747
GO:0005868	cytoplasmic dynein complex	GOCC	16	yes	0.308192	1.36096	0.0249076	0.08789	up	1778, 8655, 1781, 10018, 6990, 1780
GO:0007608	sensory perception of smell	GOBP	19	yes	-0.196196	0.821851	0.0201519	0.0880041	down	89797, 2774, 54831, 1258, 123041, 341359, 2917
GO:0035924	cellular response to vascular endothelial growth factor stimulus	GOBP	45	yes	-0.158545	0.853384	0.0201753	0.0880465	down	7412, 207, 8829, 2321, 11156, 5156, 28514, 5587, 2322
GO:0019731	antibacterial humoral response	GOBP	23	yes	0.27441	1.31575	0.0203846	0.0888394	up	4057, 85236, 8349, 5650, 1672, 84659, 25818, 1755, 8347
GO:0034243	regulation of transcription elongation from RNA polymerase II promoter	GOBP	21	yes	0.283474	1.32773	0.0204396	0.0890189	up	123169, 9025
GO:0032200	telomere organization	GOBP	187	yes	0.133748	1.1431	0.0204746	0.0891107	up	2547, 10728, 7203, 908, 6950, 10694, 4609, 5425, 1736, 55651, 170506, 55226, 55505, 57804, 140609, 54552, 472, 7517, 7014, 79991, 5888, 80169, 10039, 65057, 55869, 225689, 7015
GO:2000404	regulation of T cell migration	GOBP	26	yes	-0.179832	0.835411	0.0205313	0.0892973	down	6278, 1893, 6364, 6352, 101, 29108, 8764, 3676, 1235, 729230, 8740, 6375
GO:0007033	vacuole organization	GOBP	222	yes	0.104497	1.11015	0.0206329	0.0896784	up	375, 7879, 8766, 29979, 5861, 5119, 9146, 57132, 9525, 11151, 27243, 55858, 79158, 27183, 26100, 10564, 51510, 5899, 64422, 79837, 57403, 55004, 8396, 58476, 51534, 91782, 19, 84313, 23673, 94241, 9711, 57724, 25978, 8411, 259173, 200576, 57617, 5305, 57231, 55054, 1203, 8027, 22863, 7405, 79156, 115201, 9066, 83452, 8100, 285973, 128077, 8406, 356, 9363, 54734
GO:0002335	mature B cell differentiation	GOBP	18	yes	-0.195693	0.822265	0.0206996	0.0899076	down	28514, 1880, 5452, 9452, 1015
GO:0051133	regulation of NK T cell activation	GOBP	7	yes	-0.261552	0.769855	0.0207214	0.0899118	down	64926, 11314, 51561, 3592
GO:0072175	epithelial tube formation	GOBP	117	yes	-0.106034	0.899394	0.0207285	0.0899118	down	6692, 8543, 3091, 7249, 57822, 57534, 57216, 5420, 54910, 1855, 84678, 8463, 8915, 5567, 57619, 25902, 51684, 51098, 26160, 51804, 80199, 5727, 79600, 23242, 30812, 58495, 9355, 144165, 5979, 7976, 7475
GO:0045834	positive regulation of lipid metabolic process	GOBP	110	yes	-0.10913	0.896614	0.0207706	0.0900286	down	301, 3949, 207, 7132, 5747, 5447, 9517, 10558, 7410, 6363, 1389, 51099, 1917, 2321, 5156, 22863, 3667, 83643, 84649, 3815, 1236, 2247, 2268, 6770, 2246, 2170, 7124, 5468, 57540, 2822, 2322, 225, 3357, 23409, 2046
GO:0051607	defense response to virus	GOBP	212	yes	-0.0856407	0.917924	0.0207834	0.0900286	down	1173, 375, 3428, 330, 4283, 162, 3659, 7128, 340061, 5359, 1175, 256987, 4938, 55324, 5788, 920, 54476, 10053, 51606, 5366, 29108, 148022, 596, 8692, 1174, 27297, 958, 5610, 81559, 664, 60489, 3055, 925, 2534, 1794, 926, 3455, 5551, 3932, 6693, 2150, 200316, 90865, 9844, 919, 3600, 130340, 3559, 50489, 140564, 3569, 1755, 940, 3594, 64170, 51561, 51284, 117854, 164668
GO:0008544	epidermis development	GOBP	301	yes	0.0924281	1.09683	0.0208276	0.0901597	up	3861, 3868, 2810, 301, 2171, 360, 488, 8626, 5493, 6699, 2012, 6698, 9368, 3911, 6700, 3065, 2125, 9314, 224, 6278, 3858, 7051, 1382, 79755, 6704, 6703, 3516, 4089, 57822, 84518, 5467, 57216, 646, 5604, 29841, 84283, 2263, 8394, 94234, 5017, 10555, 8796, 596, 5744, 204219, 55506, 8456, 8644, 28514, 26160, 55504, 5650, 80326, 1041, 7454, 4038, 80199, 5727, 6705, 6706, 54345, 8689, 79152, 2069, 530…
GO:0050918	positive chemotaxis	GOBP	47	yes	-0.148882	0.86167	0.0209099	0.0904551	down	7249, 11151, 2152, 6352, 4233, 8829, 9037, 3603, 5795, 2150, 285, 2247, 9048, 1233, 4908
GO:1904115	axon cytoplasm	GOCC	29	yes	0.237873	1.26855	0.0257649	0.090516	up	3091, 4976, 23095, 124997, 282991, 4747, 388552, 9001
GO:0043038	amino acid activation	GOBP	90	yes	0.198172	1.21917	0.0209638	0.0906274	up	3735, 2617, 2193, 833, 10056, 55157, 80222, 124454, 7965
GO:0033033	negative regulation of myeloid cell apoptotic process	GOBP	10	yes	-0.229659	0.794805	0.0210688	0.0910201	down	6352, 4254, 596, 3579
GO:0016746	transferase activity, transferring acyl groups	GOMF	324	yes	0.10982	1.11608	0.0132737	0.0912478	up	6303, 80218, 2194, 23326, 25921, 7051, 47, 3157, 10652, 138050, 56894, 7994, 9517, 6342, 51304, 10558, 64834, 60481, 51126, 79017, 8520, 55226, 84885, 55683, 211, 171546, 51230, 10555, 64841, 204219, 79603, 254531, 51099, 51114, 9425, 129642, 4261, 1737, 253558, 2686, 84649, 23390, 137695, 9397, 284098, 57106, 79071, 151050, 2678, 56895, 165679, 9227, 126129, 24142, 55304, 494143, 79844, 80339
GO:0001953	negative regulation of cell-matrix adhesion	GOBP	28	yes	0.253758	1.28886	0.0211365	0.0912496	up	4323, 8751, 23603, 5295, 90102, 9723
GO:0010560	positive regulation of glycoprotein biosynthetic process	GOBP	13	yes	-0.214014	0.807337	0.0211503	0.0912496	down	2801, 6363, 10267, 1236, 3600
GO:0019318	hexose metabolic process	GOBP	246	yes	0.102959	1.10845	0.0212129	0.0914586	up	2597, 226, 2171, 7167, 5230, 5500, 5223, 4191, 27230, 10776, 51094, 207, 4125, 2806, 3099, 5214, 5209, 2932, 2820, 4938, 6652, 5467, 6576, 2026, 51363, 2519, 5366, 51181, 2582, 114897, 4122, 7355, 1737, 7262, 4351, 3667, 5208, 23275, 23411, 84649, 5210, 32, 2585, 3795, 2526, 89801, 3569, 84750, 5167, 7124, 2529, 5105, 648791, 2822, 5950, 51738
GO:0034605	cellular response to heat	GOBP	110	yes	0.14265	1.15333	0.0212475	0.0915461	up	3320, 10728, 2288, 26509, 9531, 2932, 573, 3281, 56892, 1965, 9688, 9529, 79902, 817, 472, 27000, 79023, 23411, 26973, 2246, 6489, 22797, 816, 3305, 286133
GO:0001562	response to protozoan	GOBP	19	yes	-0.192102	0.825222	0.0213034	0.0917255	down	3265, 958, 3394, 6693, 3662, 10538, 79679, 3569, 6556, 3592
GO:0032835	glomerulus development	GOBP	58	yes	-0.138266	0.870867	0.0213207	0.0917387	down	4643, 57216, 5420, 9688, 596, 5156, 1286, 285, 5979, 1285, 2303, 4868, 84623
GO:0045840	positive regulation of mitotic nuclear division	GOBP	37	yes	0.229213	1.25761	0.0213993	0.0920155	up	11331, 5902, 51529, 2069, 940, 1950, 255324
GO:0050662	coenzyme binding	GOMF	175	yes	0.121816	1.12955	0.013464	0.0920739	up	2597, 1718, 3945, 2194, 37, 23028, 53905, 5447, 6342, 2108, 64118, 6652, 1717, 28976, 10994, 1488, 5625, 8540, 1536, 80146, 27158, 220, 64780, 11112, 5860, 51700, 2762, 51547, 51167, 23411, 4199, 51741, 55349, 414149, 3291, 79777, 606495, 1428, 23409
GO:0008655	pyrimidine-containing compound salvage	GOBP	17	yes	0.34832	1.41669	0.0214749	0.092156	up	7378, 978
GO:0043097	pyrimidine nucleoside salvage	GOBP	16	yes	0.34832	1.41669	0.0214749	0.092156	up	7378, 978
GO:0032490	detection of molecule of bacterial origin	GOBP	10	yes	-0.229222	0.795152	0.0215304	0.0923327	down	7097, 7096, 10333
GO:0019755	one-carbon compound transport	GOBP	7	yes	0.395776	1.48554	0.0215741	0.0924582	up	360, 760, 362, 366, 6563
GO:1904814	regulation of protein localization to chromosome, telomeric region	GOBP	14	yes	0.323015	1.38129	0.0216687	0.0928018	up	908, 6950, 10694, 1736, 54552
hsa05110	Vibrio cholerae infection	KEGG	50	yes	0.201406	1.22312	0.0225992	0.0930045	up	71, 29927, 375, 11014, 10945, 9414, 523, 7082, 533, 9550, 9114, 51382, 51606, 23480, 115, 5567, 5579, 4583, 245973, 525, 5582
GO:0007626	locomotory behavior	GOBP	148	yes	-0.0942356	0.910068	0.0217939	0.0931702	down	3620, 25946, 56172, 89797, 8704, 4204, 3398, 4929, 3251, 23259, 220, 4644, 55636, 10752, 4045, 793, 1497, 64072, 2906, 23551, 53616, 84189, 9099, 2019, 6616, 6900, 7545, 4857, 3766, 491, 4987, 1812, 23544, 51168, 1137, 55079, 1621
GO:0010092	specification of animal organ identity	GOBP	25	yes	-0.178736	0.836326	0.0217972	0.0931702	down	3516, 2263, 10818, 367, 2246, 22943, 89780, 3670, 7472, 3207
[truncated: 7,200 more rows]
